# Supplementary material
Source: publisher figshare collection journal article supplement (https://gsajournals.figshare.com/ndownloader/files/27628664)
Supplement: Supplementary file 1 [file 27628664]

## Sheet: Annotation
Chromosome or contig	Protein_ID	Start	End	Strand	Gene Name	Product	GO	InterPro	PFAM	CDD	TIGRFAM	Eggnog	EggCategory	Protein Seq	Nucleotide Seq(exon only)
Chr01	GmHk_01G000001.1	3847	4098	-	-	hypothetical protein						-	-	MNKNINETKAQTRTQHDANKKTNNRTRRKHEHGQITKKKKELDRIEPISRAEALIPDDVILTRSRSLDTDYGDLDDATSCEGR	ATGAACAAGAACATTAACGAAACAAAGGCACAAACAAGAACGCAACACGACGCAAACAAGAAAACAAATAACAGAACAAGGAGAAAACACGAACATGGACAAATTACAAAGAAAAAAAAAGAATTGGATAGGATAGAACCTATATCAAGAGCCGAAGCTCTGATACCAGATGATGTGATCCTGACTAGGAGCAGATCGCTTGATACAGACTACGGAGATTTGGATGACGCCACTTCCTGTGAAGGAAGATAA
Chr01	GmHk_01G000002.1	4824	5483	+	-	hypothetical protein		IPR005162	PF03732			Retrotransposon protein	L	MAEAGDGGGDYHQLDRSQRLLLDVMTTQMQQLLNCNNEELYRRIKGLEHQMNPNAERPYGRNRRVNNGPNRIEGQDRIEGVKLSVPPFKGRSDPNAYLDWEMKIQHAFSYNDYPEEHKMKLAAATFSDFALVWLKKNQREMKREEGQEIDTWIEMRKVMRKRYVPTSYSRTMRQKLQSLIVKEYYKEMKMALVRANIEEDTKAVHDGFTNKISF	ATGGCAGAAGCTGGTGATGGTGGTGGTGATTATCATCAATTGGACAGATCTCAGCGCTTATTACTAGATGTGATGACTACACAAATGCAACAATTGTTGAACTGTAACAATGAAGAGCTCTACAGACGAATAAAAGGACTAGAGCACCAAATGAACCCAAATGCTGAGAGACCTTATGGTAGGAACAGAAGGGTCAATAATGGACCGAACCGAATAGAAGGGCAGGATAGAATTGAGGGAGTAAAACTCAGTGTTCCCCCTTTTAAAGGCAGGAGTGACCCAAACGCCTACCTTGATTGGGAGATGAAGATTCAACATGCATTCTCCTACAATGATTATCCTGAAGAGCATAAGATGAAGTTAGCAGCAGCTACATTCTCAGACTTTGCTCTTGTTTGG…
Chr01	GmHk_01G000003.1	96885	100592	-	At4g35335_0	Protein FAR1-RELATED SEQUENCE 9	GO:0008270	IPR007527;IPR018289	PF04434;PF10551			protein FAR1-RELATED SEQUENCE	S	MSITRQCPLGGGGHHVLDYLKHMQAENPAFFYAVQDVNNLACGNIFWADATSRTNYSYFGDAVILDTTYKTNRCRVPFTSFNGLNHHGQPVLFGCALIFNESESSFIWLFRTWLHAMSGRHPVSITTDLDPFIQVTVAQVLPSTRHRFCEWSIFRETRGKLAHLCQSYPAFETEFKKCVHESETIDEFESYWHSLLERFYVMDNEWLQSIYNSRQHWVPVYLRETFFGEISLNEGNEYLISFFDGYVNSSTTLQVLVRQYEKAVSSWHEKELKADYDTTNSSPVLKTPSPMEKQAASLYTRKIFMKFQEELVETLANPAIKIDDSGTITTYRVAKFGENQKSHVVTFNSFEMKASCSCQMFEFSGIICRHILSVFRAKNVLTLPSQYVLTCWTRNAKTG…	ATGAGTATCACTAGACAGTGTCCCCTTGGTGGTGGGGGTCATCACGTATTGGACTACTTGAAGCATATGCAGGCAGAGAATCCTGCTTTCTTTTATGCAGTCCAGGATGTCAATAATCTCGCGTGTGGGAATATATTTTGGGCTGATGCAACATCTAGAACAAACTACTCTTATTTTGGAGATGCTGTTATATTGGACACAACCTACAAGACTAACCGATGCCGGGTTCCATTTACCTCTTTCAATGGGTTGAATCATCATGGGCAACCTGTGTTATTTGGTTGTGCATTGATTTTCAATGAATCTGAGTCGTCATTTATATGGCTATTCAGGACTTGGCTTCATGCCATGTCTGGCCGCCACCCTGTCTCTATTACAACAGATTTGGACCCTTTCATA…
Chr01	GmHk_01G000003.2	96885	100592	-	At4g35335_0	Protein FAR1-RELATED SEQUENCE 9	GO:0008270	IPR007527;IPR018289	PF04434;PF10551			protein FAR1-RELATED SEQUENCE	S	MSITRQCPLGGGGHHVLDYLKHMQAENPAFFYAVQDVNNLACGNIFWADATSRTNYSYFGDAVILDTTYKTNRCRVPFTSFNGLNHHGQPVLFGCALIFNESESSFIWLFRTWLHAMSGRHPVSITTDLDPFIQVTVAQVLPSTRHRFCEWSIFRETRGKLAHLCQSYPAFETEFKKCVHESETIDEFESYWHSLLERFYVMDNEWLQSIYNSRQHWVPVYLRETFFGEISLNEGNEYLISFFDGYVNSSTTLQVLVRQYEKAVSSWHEKELKADYDTTNSSPVLKTPSPMEKQAASLYTRKIFMKFQEELVETLANPAIKIDDSGTITTYRVAKFGENQKSHVVTFNSFEMKASCSCQMFEFSGIICRHILSVFRAKNVLTLPSQYVLTCWTRNAKTG…	ATGAGTATCACTAGACAGTGTCCCCTTGGTGGTGGGGGTCATCACGTATTGGACTACTTGAAGCATATGCAGGCAGAGAATCCTGCTTTCTTTTATGCAGTCCAGGATGTCAATAATCTCGCGTGTGGGAATATATTTTGGGCTGATGCAACATCTAGAACAAACTACTCTTATTTTGGAGATGCTGTTATATTGGACACAACCTACAAGACTAACCGATGCCGGGTTCCATTTACCTCTTTCAATGGGTTGAATCATCATGGGCAACCTGTGTTATTTGGTTGTGCATTGATTTTCAATGAATCTGAGTCGTCATTTATATGGCTATTCAGGACTTGGCTTCATGCCATGTCTGGCCGCCACCCTGTCTCTATTACAACAGATTTGGACCCTTTCATA…
Chr01	GmHk_01G000003.3	100579	102149	-	At4g35335_0	CMP-sialic acid transporter 4						membrane	EG	MDYRKIKDEDEVRDVGVEDVGKSFLLSGTGIAIAPPGWIMDSCVVPSVVTLALTVLTSSQGILIVWSKRAGNYEYRVTTANFMVETLKCAISLVALGRIWKKGGVNEDNRLTTIFDEVIVYPIPPALYLVPYSTNEYH	ATGGATTACAGGAAAATCAAAGACGAGGATGAAGTTAGGGATGTGGGCGTTGAGGACGTTGGAAAATCATTTTTGCTGTCAGGTACCGGTATCGCTATCGCTCCTCCGGGCTGGATAATGGATAGTTGTGTTGTACCGTCAGTTGTTACACTTGCATTGACTGTTCTTACTAGTTCGCAAGGCATTCTAATCGTTTGGTCCAAGAGAGCTGGCAATTATGAGTATAGAGTCACTACTGCTAACTTTATGGTGGAGACTTTAAAATGTGCTATATCCCTTGTGGCCTTGGGAAGAATATGGAAAAAAGGCGGTGTCAATGAGGACAACAGGTTGACTACAATCTTTGATGAAGTTATAGTGTATCCTATTCCACCAGCACTTTACCTTGTCCCCTACAGC…
Chr01	GmHk_01G000004.1	104644	106113	-	-	hypothetical protein		IPR005162	PF03732			Retrotransposon protein	L	MRGNSSAGDLVPLDLEIEATCRRNNAERRRKILQERTTQPIFPELRESEVGASEVLIMAEDQPRKIEICNKVKIVGVPEDAVRLSLFSFSLAGEAKRWLHSFKGNNLKTWEKVVEKFLKKYFPESKTAEGKAAISSFHQFPDESLSESKQLLDSSAGGKIKLKTPEEAMELIENMASSDHAILRDRAHVPTKRSLLELSSQDALLAQNKLLAKQLESLTETLSKLPTQLQVGGCSIYGRAHESGCCISLDEAAKEVNYTGNQHRPGFNARGLVGYQQGSNFNQNQGQWRSHPGNQFNKDQGGSSNRPQNQAPSLYERTTKLEETFAQFLQVTMSNHKSTESTIKNLEIQVGQLSKQIADNSSRSFGANTENNPKE	ATGCGAGGCAACTCTTCTGCAGGTGATTTAGTTCCATTAGATTTGGAGATAGAGGCTACTTGCAGGAGAAACAACGCCGAGAGAAGGAGAAAAATTTTGCAGGAAAGGACAACACAACCAATCTTTCCAGAGTTAAGAGAATCTGAAGTAGGTGCCTCTGAAGTTCTAATTATGGCTGAAGATCAACCACGAAAGATTGAGATTTGCAACAAAGTGAAGATTGTCGGTGTGCCAGAAGATGCAGTGAGACTCAGTTTATTTTCATTTTCCTTGGCTGGAGAAGCTAAGAGGTGGTTGCACTCTTTTAAGGGAAACAATTTAAAGACTTGGGAGAAGGTTGTAGAGAAGTTTTTGAAGAAGTATTTTCCTGAGTCCAAGACAGCTGAAGGCAAGGCCGCT…
Chr01	GmHk_01G000005.1	122658	133897	+	FRS5_0	Protein FAR1-RELATED SEQUENCE 5	GO:0008270	IPR006564;IPR007527;IPR018289	PF03101;PF04434;PF10551			protein FAR1-RELATED SEQUENCE 5-like	S	MDNEVEVLEFDIGLGGGEGEYDDDDGGGIDEEELGVATGGGEIYLPEVDLLDLEPCEGMEFESEEAAKAFYNSYARRVGFSTRVSSSRRSRRDGAIIQRQFVCAKEGFRNLNEKRTKDREIKRPRTITRVGCKASLSVKMQDSGKWIVSGFVREHNHELVPPDQVHCLRSHRQISGAAKTLIDTLQAAGMGPRRIMSALIKEYGGISKVGFTEVDCRNYMRNNRLRSLEGDIQLVLDYLRQMHAENPNFFYAVQGDEDQSITNVFWADPKARMNYTFFGDTVTFDTTYRSNRYRLPFAFFTGVNHHGQPVLFGCAFLINESEASFVWLFKTWLMAMSGCPPVSITTDHDSAIRSAIIQVFPETRHRFCKWHIFKKCQEKLSHIFLQYPNFEAEFHKCVN…	ATGGATAACGAGGTCGAGGTGCTAGAATTTGATATTGGGCTGGGAGGAGGCGAGGGAGAATATGACGATGACGACGGAGGAGGAATTGATGAGGAGGAATTGGGTGTAGCCACTGGAGGTGGGGAAATATATCTTCCTGAGGTGGACCTCTTAGATCTTGAACCTTGCGAGGGCATGGAATTCGAGTCTGAAGAGGCTGCCAAGGCCTTCTACAATTCCTATGCCCGTCGTGTTGGGTTTAGTACTCGCGTCAGCTCATCCCGTCGTTCCAGGCGCGATGGAGCTATTATACAGAGGCAATTTGTTTGCGCAAAGGAGGGTTTCCGCAACTTGAATGAGAAACGCACGAAGGATAGAGAGATCAAGCGCCCACGAACAATTACCCGAGTCGGTTGTAAA…
Chr01	GmHk_01G000006.1	202790	207997	+	-	hypothetical protein	GO:0001671;GO:0051087	IPR036338	PF09229			AHA1, activator of heat shock 90kDa protein ATPase homolog	O	MVQLKILFSLKLRSSKMESGALVSSEKEGQQGASYTYWVRKITEDAAPLPVPRKLNPEDVPPCHSQSQSRSATLGSAWNRAGTWEEKSLNNWATPRIKELLISLGSIQFSFGRAEVEDVTKCVGDAFMVIVRNKKRVGYTYELSLKVKGEWIIQGEKKFVGGHIDVPEFSFGELDELQVEVRLSEARDILHQDKTQICNDLKLFLQPVREKLLQFEQELKDR	ATGGTGCAACTTAAAATTTTGTTTTCTTTGAAATTGAGAAGTAGTAAAATGGAGTCTGGAGCCCTAGTGTCGTCCGAGAAAGAAGGGCAGCAAGGAGCCTCGTATACGTACTGGGTTAGGAAAATAACGGAAGATGCAGCGCCTTTGCCTGTGCCTCGTAAGCTCAACCCAGAAGATGTTCCCCCTTGTCATTCTCAATCTCAATCTCGGTCTGCCACGCTTGGCTCAGCTTGGAATCGCGCTGGGACATGGGAGGAGAAAAGTCTAAACAATTGGGCAACTCCGAGAATTAAGGAGTTGCTTATCTCATTAGGCTCCATACAGTTCTCCTTTGGCAGAGCAGAAGTAGAAGATGTAACAAAATGTGTTGGCGATGCATTCATGGTGATAGTTCGGAAC…
Chr01	GmHk_01G000006.2	202858	207997	+	-	hypothetical protein	GO:0001671;GO:0051087	IPR036338	PF09229			AHA1, activator of heat shock 90kDa protein ATPase homolog	O	MESGALVSSEKEGQQGASYTYWVRKITEDAAPLPVPRKLNPEDVPPCHSQSQSRSATLGSAWNRAGTWEEKSLNNWATPRIKELLISLGSIQFSFGRAEVEDVTKCVGDAFMVIVRNKKRVGYTYELSLKVKGEWIIQGEKKFVGGHIDVPEFSFGELDELQVEVRLSEARDILHQDKTQICNDLKLFLQPVREKLLQFEQELKDR	ATGGAGTCTGGAGCCCTAGTGTCGTCCGAGAAAGAAGGGCAGCAAGGAGCCTCGTATACGTACTGGGTTAGGAAAATAACGGAAGATGCAGCGCCTTTGCCTGTGCCTCGTAAGCTCAACCCAGAAGATGTTCCCCCTTGTCATTCTCAATCTCAATCTCGGTCTGCCACGCTTGGCTCAGCTTGGAATCGCGCTGGGACATGGGAGGAGAAAAGTCTAAACAATTGGGCAACTCCGAGAATTAAGGAGTTGCTTATCTCATTAGGCTCCATACAGTTCTCCTTTGGCAGAGCAGAAGTAGAAGATGTAACAAAATGTGTTGGCGATGCATTCATGGTGATAGTTCGGAACAAGAAACGTGTTGGTTACACATATGAGTTGAGCTTAAAAGTCAAAGGG…
Chr01	GmHk_01G000007.1	211867	215851	+	cemA_0	Chloroplast envelope membrane protein	GO:0016021		PF03040			Involved in light-induced Na( )-dependent proton extrusion. Also seems to be involved in CO(2) transport (By similarity)	P	MNCAEAECAFTRGTEKCGYIFMILMSSSIVLCDNLILFNQKLLLKSFVSRGSSNFVIQLSSKTRRLNGFISKAEKHSGHSRKSSWWQKFFFEDDGNWLGLRDDDMVEAEAEAEGEGESTQELSEGDKFEAWKQRAEAIVELREAQEDGRNQAYRKWEDWLLDGDGTNGEDNTSSWEQEMRDYRENVRADSGDVPAEKGIVESARYLIFGREDDDMLYEDRVFQYASSNSAKFLAVLIIVPWAMDFLVHDYILMPFLDRYVKTVPLAAQMLDVRRYQKLQIIEELRTERGRFELEVEIGKSPPLSDDEVWWELRHKALELREEWRLENRRAFANICSLALVFTGFGADIEGTDSWEQGDKKNHVEFLNGSPPEAKSK	ATGAACTGTGCAGAAGCAGAATGTGCATTCACTCGGGGAACTGAAAAATGTGGGTATATATTCATGATCTTGATGAGCTCTTCAATTGTTTTATGCGACAACTTAATCCTCTTTAATCAGAAGCTGCTTTTGAAGTCTTTCGTCTCGCGTGGTTCATCCAACTTTGTGATTCAGTTAAGCAGCAAAACGAGGCGTCTTAACGGGTTCATTTCAAAAGCGGAAAAGCATAGTGGCCATTCAAGGAAAAGCAGTTGGTGGCAGAAATTCTTTTTCGAAGATGATGGGAATTGGCTTGGTTTGAGAGACGATGATATGGTAGAGGCTGAGGCTGAGGCTGAGGGCGAGGGTGAGAGCACACAAGAGTTATCTGAGGGCGACAAGTTTGAGGCATGGAAGCAG…
Chr01	GmHk_01G000008.1	216311	217090	-	-	hypothetical protein		IPR000477	PF00078			Retrotransposon protein	S	MLFADDIVLLGESREELNERLETWRRALETHGFRLSRSKSEYMECKFNKSRRVSNSEVKIGDHIIPQVTRFKYLGTVIQNDGEIEGDVNHRIQAGWMKWRKASGVLCDAKVPIKLKGKFYRTAVRPAILYGTECWAVKSQHETKVGVAEMRMLRWMCGKTRQDKIRNGTIRERVGVAPIVEKMVENRLRWFGHVERRPVDSVVRRVDQMERRQTIRGRGRPKKTIREVIKKDLELNDLDRSMVLDRTLWRKLIHVADLT	ATGCTTTTTGCAGATGACATAGTCCTCCTTGGAGAGTCGAGGGAGGAGTTGAATGAGAGGTTGGAAACTTGGAGACGAGCTCTAGAAACACATGGCTTTCGCCTAAGCAGAAGCAAATCGGAGTATATGGAATGTAAGTTCAACAAAAGTAGGAGGGTATCTAACTCAGAGGTGAAAATAGGAGACCATATTATCCCTCAAGTCACACGGTTTAAATATCTTGGGACTGTAATACAGAATGATGGAGAAATTGAAGGGGATGTGAATCATCGCATTCAAGCAGGATGGATGAAATGGAGAAAAGCATCGGGGGTGTTATGTGATGCAAAGGTACCGATCAAGCTAAAGGGAAAGTTTTATCGGACTGCGGTAAGACCGGCGATTTTGTACGGAACAGAA…
Chr01	GmHk_01G000009.1	228288	231968	-	TOR1L2	TORTIFOLIA1-like protein 2		IPR011989;IPR016024;IPR034085				Microtubule-associated protein	S	MKRAQGNGGLEMKQRIVGALNKVGDRDTQQIGMEELDRMAQGLRAEGIWSFLSCILDSDWEQKASIRKECVRLMGTLATYYDGLVLPHLPKMVASIVKRLRDPDSVVRDVCVNTVALLASKLGRDGEDKVFVVLVRPIFEALGEQNKHVQSSSALCLARIIDNTPHPPLSLLHKMLSRTLKLLKNPHFIAKPALLDFTRSIILAGGAPTHNILSAAISSIQDSLKHSDWSTRKAASLALADIALSAASFLGFFRASCLQSLESCRFDKVKPVRDAVMQALKYWTILPAPPDTPDPSETGSSLKENICRGDSSDLSSTTTESRHIQKVNMKSTMGRIPFSVKNYARNNHQKPDDWDVQVAVPRPHSLVEFQNKESESCSVTKQPLETMSADVTSMQDVGY…	ATGAAGAGGGCACAGGGAAATGGGGGTTTGGAGATGAAGCAGAGAATAGTAGGTGCGCTGAACAAGGTTGGGGATCGGGACACGCAGCAAATAGGGATGGAGGAGCTAGATCGAATGGCGCAGGGCTTAAGAGCGGAAGGGATATGGTCCTTCTTGTCATGCATACTAGACTCCGACTGGGAGCAGAAAGCCTCCATCAGAAAGGAGTGCGTAAGACTGATGGGAACGTTGGCCACCTACTACGATGGCCTGGTCCTTCCGCATCTTCCCAAAATGGTTGCAAGCATCGTCAAGCGCCTCAGGGATCCCGACTCTGTCGTCCGGGATGTCTGCGTCAACACGGTTGCTCTTCTCGCCTCCAAATTGGGCCGTGACGGCGAGGACAAGGTGTTTGTTGTT…
Chr01	GmHk_01G000010.1	233774	243965	-	GgCAS1_1	Cycloartenol synthase	GO:0016866	IPR008930;IPR018333;IPR032696;IPR032697	PF13243;PF13249	cd02892	TIGR01787	Squalene--hopene cyclase	I	MWKLKFAEGGNPWLRTLNNHVGRQVWEFDPKLGSPQDLLEIEKARQNFHDNRFTHKHSADLLMRMQFARENPTREVLPKVGVKDIEDVTQEIVTKTLRRAVSFHSTLQCHDGHWPGDYGGPMFLMPGLVITLSITGALNTVLTEEHRKEICRYLYNHQNKDGGWGLHIEGPSTMFGSVLSYITLRLLGEGPNDGQGEMEKARDWILGHGGATYITSWGKMWLSVLGVYEWSGNNPLPPEIWLLPYMLPFHPGRMWCHCRMVYLPMSYLYGKRFVGPISPTVLSLRKELYTVPYHDIDWDQARNLCAKEDLYYPHPLVQDILWASLHKFLEPILMHWPGKRLREKAIISALEHIHYEDENTRYICIGPVNKVLNMLCCWVEDPNSEAFKLHLPRIYDYLW…	ATGTGGAAGCTCAAGTTCGCCGAAGGAGGGAATCCATGGCTTCGGACATTGAACAATCACGTTGGAAGACAGGTGTGGGAGTTCGATCCTAAGCTTGGATCGCCGCAAGATCTCCTCGAGATTGAGAAAGCTCGCCAGAATTTTCACGATAACCGCTTTACCCACAAACACAGCGCTGATCTACTTATGCGGATGCAGTTCGCAAGAGAGAACCCAACACGTGAAGTCTTGCCCAAAGTCGGAGTTAAGGATATTGAGGATGTGACCCAAGAGATTGTGACAAAAACATTAAGAAGGGCCGTAAGTTTCCATTCAACTCTCCAGTGCCATGACGGACACTGGCCGGGAGATTATGGAGGTCCCATGTTTCTGATGCCTGGCTTGGTAATTACTCTGTCT…
Chr01	GmHk_01G000010.2	233774	243965	-	GgCAS1_1	Cycloartenol synthase	GO:0016866	IPR008930;IPR018333;IPR032696;IPR032697	PF13243;PF13249	cd02892	TIGR01787	Squalene--hopene cyclase	I	MWKLKFAEGGNPWLRTLNNHVGRQVWEFDPKLGSPQDLLEIEKARQNFHDNRFTHKHSADLLMRMQFARENPTREVLPKVGVKDIEDVTQEIVTKTLRRAVSFHSTLQCHDGHWPGDYGGPMFLMPGLVITLSITGALNTVLTEEHRKEICRYLYNHQNKDGGWGLHIEGPSTMFGSVLSYITLRLLGEGPNDGQGEMEKARDWILGHGGATYITSWGKMWLSVLGVYEWSGNNPLPPEIWLLPYMLPFHPGRMWCHCRMVYLPMSYLYGKRFVGPISPTVLSLRKELYTVPYHDIDWDQARNLCAKEDLYYPHPLVQDILWASLHKFLEPILMHWPGKRLREKAIISALEHIHYEDENTRYICIGPVNKVLNMLCCWVEDPNSEAFKLHLPRIYDYLW…	ATGTGGAAGCTCAAGTTCGCCGAAGGAGGGAATCCATGGCTTCGGACATTGAACAATCACGTTGGAAGACAGGTGTGGGAGTTCGATCCTAAGCTTGGATCGCCGCAAGATCTCCTCGAGATTGAGAAAGCTCGCCAGAATTTTCACGATAACCGCTTTACCCACAAACACAGCGCTGATCTACTTATGCGGATGCAGTTCGCAAGAGAGAACCCAACACGTGAAGTCTTGCCCAAAGTCGGAGTTAAGGATATTGAGGATGTGACCCAAGAGATTGTGACAAAAACATTAAGAAGGGCCGTAAGTTTCCATTCAACTCTCCAGTGCCATGACGGACACTGGCCGGGAGATTATGGAGGTCCCATGTTTCTGATGCCTGGCTTGGTAATTACTCTGTCT…
Chr01	GmHk_01G000011.1	244420	245170	+	-	hypothetical protein							R	MLFVLYLLSTLTIKPVPPPHLCQTRATRRWCCRHHCDGLPLSLMGIQDEEQEREGERSTAVRSHLAALVGAIDCSCETLRDCSSSQALEGEVVFSDDEDEVPAMTVVVLDAARDGGCSMVRRYLVLNLLFVVFLKVMVKQWFCNNFSDLKKLKGRKKSERETPSSW	ATGTTATTTGTCCTCTACCTCTTATCAACCCTAACAATCAAACCCGTGCCGCCACCGCACCTCTGTCAAACCCGCGCCACAAGGCGGTGGTGCTGCCGCCACCATTGCGATGGTCTACCTTTATCGCTAATGGGAATACAAGATGAAGAGCAAGAGAGGGAAGGAGAACGATCTACGGCGGTGCGCTCGCATTTGGCGGCTTTGGTGGGTGCGATAGATTGCTCCTGTGAAACATTGCGCGATTGCTCTTCGTCTCAGGCATTGGAAGGGGAGGTGGTTTTCAGTGACGATGAAGATGAGGTTCCAGCGATGACTGTAGTTGTTTTGGACGCAGCGAGAGATGGAGGTTGCTCGATGGTTCGTCGTTATCTGGTCCTTAATTTGTTGTTTGTTGTTTTC…
Chr01	GmHk_01G000012.1	250014	250259	-	-	hypothetical protein						-	-	MKGLESSTTAMTMREKKEPTRHPKGPFKNRFIRGWPTQLYKNLPCSLTTRCGTRNTPPQVRARHHKARASGTIHTTRQNWK	ATGAAGGGGTTAGAATCATCAACGACAGCCATGACCATGAGAGAAAAAAAAGAACCAACCAGGCATCCGAAAGGTCCCTTTAAAAATCGATTCATAAGGGGGTGGCCTACCCAGCTATATAAGAACTTACCATGCTCGTTAACCACCCGATGTGGGACTCGCAACACGCCCCCTCAAGTCAGGGCTCGTCACCACAAAGCAAGAGCTAGCGGAACTATCCACACCACCAGGCAGAACTGGAAATAG
Chr01	GmHk_01G000013.1	255112	266849	+	CASS	Cycloartenol synthase	GO:0016866	IPR018333;IPR032696;IPR032697	PF13243;PF13249	cd02892	TIGR01787	Squalene--hopene cyclase	I	MWKLKFSKSNEDEWIMQSVNNHIGRQFWEFDPHLGTKEERAQVEQVHKEFNKNRFKYKHSSDLLMRLQFEREKGLKTKLSKIEIQSEQDINEEVVRNTLKRALRSYSALQADDGFWPADYGGPLFLLPGLVIGLSVTGVLNVVLTPEHQSEMRRYLFNHQNEDGGWGLHIEGSSTMFCTALNYVTLRLLGEDIDGGEGAIQKARTWILHHGGVTYIPSWGKLWLSVLGVYEWSGMKPIPPETWLFPYFLPFHPGRMWCHSRLVYLPMSYLYGRRFVGPINTIILSLRKELYTIPYHLLNWNEAKNLCAKEDLYHPCPMIQNILWGFLHNIGEPLLMHWPCSKLREKALHYIMQHIHYEDENTNYICIGPVNKVLNMVCCWLENPNSHAFKYHISRIKDY…	ATGTGGAAGCTGAAGTTTTCAAAGAGCAATGAGGATGAGTGGATAATGCAAAGTGTGAATAATCATATTGGAAGACAGTTCTGGGAGTTCGATCCACATCTTGGAACCAAAGAAGAGCGAGCTCAAGTAGAACAAGTTCATAAAGAATTTAACAAGAACCGCTTCAAATATAAGCATAGTTCTGATCTCCTAATGAGACTCCAGTTTGAAAGGGAAAAAGGCTTAAAGACGAAACTAAGTAAGATAGAAATTCAGAGCGAGCAAGATATAAATGAGGAAGTTGTGCGAAACACACTGAAAAGAGCCTTGAGATCTTATTCAGCCCTACAAGCCGATGATGGATTTTGGCCTGCTGACTATGGCGGCCCCTTGTTTCTTCTACCTGGTTTGGTGATTGGA…
Chr01	GmHk_01G000013.2	259973	266849	+	CASS	Cycloartenol synthase 2		IPR008930;IPR032696	PF13243			Squalene--hopene cyclase	I	MNAGFEYFRGFSTKITLDTEDLYHPCPMIQNILWGFLHNIGEPLLMHWPCSKLREKALHYIMQHIHYEDENTNYICIGPVNKVLNMVCCWLENPNSHAFKYHISRIKDYLWLAEDGMKMQGYNGSQFWDVTFSIQAILAINLEDEYGSILKKANNFIKYSQITANSSGNLSHWYRHISKGGWPFSTADNGWPVSDCTAEGLKAAILLSNLPFETVGKPMETEQLWDAVNLILSLQNRNGGFASYELTRSYAWLEKINPTETFEDIMIDYQYGSWGICYIYGTWFGIKGLIDAGKSYQDSQSIRRGCEFLLSKQQLCGGWGESYIACQQKVYTNLEGNKSHVVNTAWAMLALIEAGQGQRDPTPLHRAAKVLINSQMENGEFPQQEITGVFNKHCTISYS…	ATGAACGCGGGATTTGAATATTTTAGGGGCTTTTCTACCAAAATTACTCTTGATACGGAAGATTTGTACCACCCATGCCCAATGATCCAGAATATTTTATGGGGTTTTCTTCACAATATTGGGGAACCTCTTCTCATGCACTGGCCGTGCTCCAAGCTAAGGGAAAAAGCACTCCATTATATAATGCAACATATACACTATGAAGATGAAAACACAAACTATATTTGTATTGGTCCCGTTAATAAGGTATTAAACATGGTTTGTTGTTGGTTGGAGAACCCCAATTCTCACGCCTTTAAGTATCACATTTCAAGAATCAAAGATTATCTCTGGCTCGCTGAGGATGGAATGAAAATGCAGGGATATAATGGTTCTCAATTTTGGGATGTGACTTTTTCT…
Chr01	GmHk_01G000013.3	263194	266849	+	CASS	Cycloartenol synthase 2	GO:0016866	IPR018333;IPR032696	PF13243		TIGR01787	Squalene--hopene cyclase	I	MTSPTNQVLNMVCCWLENPNSHAFKYHISRIKDYLWLAEDGMKMQGYNGSQFWDVTFSIQAILAINLEDEYGSILKKANNFIKYSQITANSSGNLSHWYRHISKGGWPFSTADNGWPVSDCTAEGLKAAILLSNLPFETVGKPMETEQLWDAVNLILSLQNRNGGFASYELTRSYAWLEKINPTETFEDIMIDYQCVECTSSAIQGLVLFTQRYPRHRWKEIKTCIAKAANYIESIQLANGSWYGSWGICYIYGTWFGIKGLIDAGKSYQDSQSIRRGCEFLLSKQQLCGGWGESYIACQQKVYTNLEGNKSHVVNTAWAMLALIEAGQGQRDPTPLHRAAKVLINSQMENGEFPQQEITGVFNKHCTISYSAYRNIFPIWALGEYRSRVLLCPSKGST…	ATGACAAGTCCTACAAATCAGGTATTAAACATGGTTTGTTGTTGGTTGGAGAACCCCAATTCTCACGCCTTTAAGTATCACATTTCAAGAATCAAAGATTATCTCTGGCTCGCTGAGGATGGAATGAAAATGCAGGGATATAATGGTTCTCAATTTTGGGATGTGACTTTTTCTATTCAAGCAATATTAGCTATCAATCTTGAGGATGAATATGGTTCGATTCTTAAGAAAGCAAATAATTTCATAAAATACTCACAGATCACAGCAAATAGCTCTGGTAATCTGAGTCATTGGTATCGCCACATTTCTAAAGGTGGTTGGCCTTTCTCAACTGCAGACAATGGTTGGCCTGTATCAGATTGCACTGCAGAAGGTTTGAAGGCAGCCATTTTGTTATCA…
Chr01	GmHk_01G000013.4	263194	266849	+	CASS	Cycloartenol synthase 2		IPR008930;IPR032696	PF13243			Squalene--hopene cyclase	I	MTSPTNQVLNMVCCWLENPNSHAFKYHISRIKDYLWLAEDGMKMQGYNGSQFWDVTFSIQAILAINLEDEYGSILKKANNFIKYSQITANSSGNLSHWYRHISKGGWPFSTADNGWPVSDCTAEGLKAAILLSNLPFETVGKPMETEQLWDAVNLILSLQNRNGGFASYELTRSYAWLEKINPTETFEDIMIDYQYGSWGICYIYGTWFGIKGLIDAGKSYQDSQSIRRGCEFLLSKQQLCGGWGESYIACQQKVYTNLEGNKSHVVNTAWAMLALIEAGQGQRDPTPLHRAAKVLINSQMENGEFPQQEITGVFNKHCTISYSAYRNIFPIWALGEYRSRVLLCPSKGSTAIA	ATGACAAGTCCTACAAATCAGGTATTAAACATGGTTTGTTGTTGGTTGGAGAACCCCAATTCTCACGCCTTTAAGTATCACATTTCAAGAATCAAAGATTATCTCTGGCTCGCTGAGGATGGAATGAAAATGCAGGGATATAATGGTTCTCAATTTTGGGATGTGACTTTTTCTATTCAAGCAATATTAGCTATCAATCTTGAGGATGAATATGGTTCGATTCTTAAGAAAGCAAATAATTTCATAAAATACTCACAGATCACAGCAAATAGCTCTGGTAATCTGAGTCATTGGTATCGCCACATTTCTAAAGGTGGTTGGCCTTTCTCAACTGCAGACAATGGTTGGCCTGTATCAGATTGCACTGCAGAAGGTTTGAAGGCAGCCATTTTGTTATCA…
Chr01	GmHk_01G000013.5	255112	257984	+	CASS	Cycloartenol synthase		IPR008930;IPR032697	PF13249			Squalene--hopene cyclase	I	MWKLKFSKSNEDEWIMQSVNNHIGRQFWEFDPHLGTKEERAQVEQVHKEFNKNRFKYKHSSDLLMRLQFEREKGLKTKLSKIEIQSEQDINEEVVRNTLKRALRSYSALQADDGFWPADYGGPLFLLPGLVIGLSVTGVLNVVLTPEHQSEMRRYLFNHQNEDGGWGLHIEGSSTMFCTALNYVTLRLLGEDIDGGEGAIQKARTWILHHGGVTYIPSWGKLWLSVLGVYEWSGMKPIPPETWLFPYFLPFHPGSAN	ATGTGGAAGCTGAAGTTTTCAAAGAGCAATGAGGATGAGTGGATAATGCAAAGTGTGAATAATCATATTGGAAGACAGTTCTGGGAGTTCGATCCACATCTTGGAACCAAAGAAGAGCGAGCTCAAGTAGAACAAGTTCATAAAGAATTTAACAAGAACCGCTTCAAATATAAGCATAGTTCTGATCTCCTAATGAGACTCCAGTTTGAAAGGGAAAAAGGCTTAAAGACGAAACTAAGTAAGATAGAAATTCAGAGCGAGCAAGATATAAATGAGGAAGTTGTGCGAAACACACTGAAAAGAGCCTTGAGATCTTATTCAGCCCTACAAGCCGATGATGGATTTTGGCCTGCTGACTATGGCGGCCCCTTGTTTCTTCTACCTGGTTTGGTGATTGGA…
Chr01	GmHk_01G000014.1	267285	275552	-	SPCC1672.07	U3 small nucleolar RNA-associated protein 21	GO:0005515;GO:0006364;GO:0032040	IPR007319;IPR015943;IPR017986;IPR019775;IPR024977;IPR036322	PF00400;PF04192;PF12894			WD repeat domain 36	S	MGIFEPYRAIGCITSSVPFSVQRLGTETFLTVSVGKAFQIFNCAKLNLVLVGPQLPKKISALASYREYTFAAYGNNIAVFKRAHQFATWSSHNAKVKLLLLFGDHIVSVDARGNMFLWPFKGIDENHVPFGHIMLDEKFSPSCIMHPDTYLNKVLIGSEQGPMQLWNISTKKKIFEFKGWNSPISCCVSSPALDVVAIGCTDGRIHVHNIRYDEELVTFTHSTRGSVTSLSFSTDGQPLLASGGSSGVISIWNLEKKRLQSVVREAHDSVITSLHFFANEPVLMSSSADNSVKMWIFDTSDGDPRLLRFRSGHSAPPFCLKFYANGRHILSAGQDRAFRLFSVVQDQQSRELSQWHVSKRARKLKLKEEEIKLKPMIAFDCAEIRERDWCNVVTCHMDT…	ATGGGTATATTTGAACCTTATAGAGCAATCGGATGCATCACAAGCAGCGTCCCCTTCTCTGTTCAAAGGCTCGGAACTGAAACTTTCCTTACTGTCAGCGTTGGAAAGGCTTTTCAGATTTTTAACTGTGCAAAGCTCAATTTGGTTCTCGTTGGTCCTCAACTGCCGAAGAAGATTAGTGCTCTTGCTTCTTATCGCGAATACACTTTTGCTGCATATGGAAACAACATTGCTGTTTTCAAGCGTGCACACCAGTTTGCAACTTGGAGCAGCCATAATGCTAAGGTTAAGTTGCTTCTGTTGTTTGGAGATCATATTGTCAGTGTTGATGCTCGCGGAAACATGTTCTTGTGGCCATTTAAGGGAATTGATGAGAACCATGTTCCGTTTGGGCACATC…
Chr01	GmHk_01G000015.1	275970	279959	+	APEM9_0	Protein APEM9						3-phosphoinositide-dependent protein	S	MDSDAAAAIAIWKEIEASESYLVCSMYEEAAELASSVLERLRHGHHDIDRDMLESSAMVLLQAFNQLPTKTPDILNQLKLHFVSLKAIPTLVLLTGACFQIAQGSESALASVQQFLHDFLNGWSLEHSQYSSVITEAASRDQSPRFILPVDEYLQVVELYALTLLATVQKDVDLAISWVENASLPEENRQGLLRSLHSMHSSKSTILSQSSFQQSPTNSNEAYPLKEQSVSEGLPKALKSNEKYRSKEAVTKLSERIEACFWCFRGINLKIGTTKFVITSGKIMLGCLILFIYYVFRKKQATLNRIVRRQAMAVKRALVDLWQLAFSYQVNPLAAVQPLSAATRQGQ	ATGGACTCAGACGCTGCTGCTGCGATTGCGATATGGAAAGAAATTGAGGCTTCAGAGAGCTACCTTGTTTGTTCTATGTACGAAGAAGCGGCAGAATTAGCTTCCTCTGTTTTGGAACGCTTGCGTCATGGCCATCATGATATCGATAGAGATATGTTGGAATCAAGTGCTATGGTGCTTCTTCAGGCATTCAACCAACTTCCCACCAAGACACCAGACATTCTTAATCAACTCAAACTACACTTTGTTTCACTCAAAGCTATTCCTACTCTTGTTCTTCTTACTGGAGCTTGTTTTCAAATAGCACAAGGTTCTGAATCTGCACTTGCCTCCGTTCAACAATTTCTCCACGACTTCCTTAATGGATGGTCTCTTGAACATTCACAATATTCTTCTGTC…
Chr01	GmHk_01G000016.1	281843	284415	+	PRK1_2	Pollen receptor-like kinase 1	GO:0004672;GO:0005515;GO:0005524;GO:0006468	IPR001611;IPR011009;IPR013210;IPR032675	PF00069;PF08263;PF13855			Serine Threonine protein kinase	T	MPYSKISPTLNCLPSHPSSFQTSRHFWKARMHVAPFLLHTGSLLKFRDSLENNNALLSSWNASIPPCSGSSHWPRVQCYKGHVSGLKLENMRLKGVIDVQSLLELPYLRTISLMNNDFDTEWPDINKIVGLKTLFLSNNNFSGEIPAQAFQGMQWLKKIHLSNNQFTGPIPTSLASMPRLMELRLEGNQFTGPIPNFQHAFKSFSVANNQLEGEIPASLHNMPPSSFSGNEGVCGAPLSACSSPKKKSTASIVAAAVLVIVALIVIGAVILLVLHQRRKQAGPEVSAENPSSIMFQSQQKEASSSDEGSRGSPTSSSHRSRSLRLLFVRDDREKFDYNELFRASAKMLGSGCFSSSYKVALLDGPEMVVKRFKQMNNVGREEFDEHMRRIGRLNHPNLL…	ATGCCATATTCCAAGATTTCTCCAACCCTTAATTGCCTTCCTTCACACCCATCATCATTCCAAACCAGCAGGCACTTCTGGAAGGCGCGCATGCACGTCGCACCATTCCTTCTGCACACAGGATCTCTCCTCAAATTCAGAGACTCCCTTGAAAACAACAATGCATTGTTGTCCTCATGGAATGCATCCATCCCTCCATGTTCGGGTTCATCCCACTGGCCTCGCGTTCAGTGTTACAAGGGACACGTGTCGGGGTTGAAGCTCGAGAACATGAGGCTCAAAGGTGTCATTGACGTCCAATCCCTCCTGGAGTTACCATATCTCAGAACCATAAGCCTCATGAACAACGACTTCGACACTGAATGGCCTGATATCAACAAGATTGTGGGTTTGAAGACC…
Chr01	GmHk_01G000016.2	281965	284415	+	PRK1_2	Pollen receptor-like kinase 1	GO:0004672;GO:0005515;GO:0005524;GO:0006468	IPR001611;IPR011009;IPR013210;IPR032675	PF00069;PF08263;PF13855			Serine Threonine protein kinase	T	MALLTSFITSFTLLLLFVIMITSASDTGSLLKFRDSLENNNALLSSWNASIPPCSGSSHWPRVQCYKGHVSGLKLENMRLKGVIDVQSLLELPYLRTISLMNNDFDTEWPDINKIVGLKTLFLSNNNFSGEIPAQAFQGMQWLKKIHLSNNQFTGPIPTSLASMPRLMELRLEGNQFTGPIPNFQHAFKSFSVANNQLEGEIPASLHNMPPSSFSGNEGVCGAPLSACSSPKKKSTASIVAAAVLVIVALIVIGAVILLVLHQRRKQAGPEVSAENPSSIMFQSQQKEASSSDEGSRGSPTSSSHRSRSLRLLFVRDDREKFDYNELFRASAKMLGSGCFSSSYKVALLDGPEMVVKRFKQMNNVGREEFDEHMRRIGRLNHPNLLPLVAYYYRKVEKL…	ATGGCACTCCTCACTTCTTTTATAACTTCATTCACATTATTATTATTATTTGTGATTATGATAACCAGTGCTTCAGACACAGGATCTCTCCTCAAATTCAGAGACTCCCTTGAAAACAACAATGCATTGTTGTCCTCATGGAATGCATCCATCCCTCCATGTTCGGGTTCATCCCACTGGCCTCGCGTTCAGTGTTACAAGGGACACGTGTCGGGGTTGAAGCTCGAGAACATGAGGCTCAAAGGTGTCATTGACGTCCAATCCCTCCTGGAGTTACCATATCTCAGAACCATAAGCCTCATGAACAACGACTTCGACACTGAATGGCCTGATATCAACAAGATTGTGGGTTTGAAGACCCTTTTCCTTTCAAATAACAATTTCTCCGGGGAGATTCCG…
Chr01	GmHk_01G000016.3	281965	284415	+	PRK1_2	Pollen receptor-like kinase 1	GO:0004672;GO:0005524;GO:0006468	IPR011009;IPR013210;IPR032675	PF00069;PF08263			Serine Threonine protein kinase	T	MALLTSFITSFTLLLLFVIMITSASDTGSLLKFRDSLENNNALLSSWNASIPPCSGSSHWPRVQCYKGHVSGLKLENMRLKGVIDVQSLLELPYLRTISLMNNDFDTEWPDINKIVGLKTLFLSNNNFSGEIPAQAFQGMQWLKKIHLSNNQFTGNEGVCGAPLSACSSPKKKSTASIVAAAVLVIVALIVIGAVILLVLHQRRKQAGPEVSAENPSSIMFQSQQKEASSSDEGSRGSPTSSSHRSRSLRLLFVRDDREKFDYNELFRASAKMLGSGCFSSSYKVALLDGPEMVVKRFKQMNNVGREEFDEHMRRIGRLNHPNLLPLVAYYYRKVEKLLVTDFVHNGSLAVRLHGYQALGQESLDWASRLKIVKGIAKGLEHLYKEMPSLIAAHGHLKS…	ATGGCACTCCTCACTTCTTTTATAACTTCATTCACATTATTATTATTATTTGTGATTATGATAACCAGTGCTTCAGACACAGGATCTCTCCTCAAATTCAGAGACTCCCTTGAAAACAACAATGCATTGTTGTCCTCATGGAATGCATCCATCCCTCCATGTTCGGGTTCATCCCACTGGCCTCGCGTTCAGTGTTACAAGGGACACGTGTCGGGGTTGAAGCTCGAGAACATGAGGCTCAAAGGTGTCATTGACGTCCAATCCCTCCTGGAGTTACCATATCTCAGAACCATAAGCCTCATGAACAACGACTTCGACACTGAATGGCCTGATATCAACAAGATTGTGGGTTTGAAGACCCTTTTCCTTTCAAATAACAATTTCTCCGGGGAGATTCCG…
Chr01	GmHk_01G000017.1	287291	291101	+	PUB35_0	U-box domain-containing protein 35	GO:0004672;GO:0005524;GO:0006468	IPR006016;IPR008271;IPR011009;IPR014729	PF00069;PF00582	cd01989		Serine Threonine protein kinase	T	MSRVNSEKKLGAGRVVAVAIENNKTSQHAAKWAVDNLLPKDQCLLLIHVRQRPSSVPSSDHLSEAVGDNESKELFESFRVFCNRKSIQCKEVLLEDTDISKALIDTISTNTIELLVLGAPSRGGLVRRFRTTDVPSTVSKGAPQFCTVYIISKGKILSVRSATAPLAPNKAAIAAAAAAATTPRNQLQPQQQPHPQIMRSPERFSDSQPPRNYPPRPTSERPTAFGSHGAHHPMMDEDDIISPFTRAGKTYEPSKFQDSDISFVSSGRPSVERMFPTLYEDQDSASGIALGRFSDYDGRNSFASSYSSQSQGIDDHSFSSQSRLSDCTDDVEFEMRRLKLELKQTMEMYSSVCKEAMTAKQKAMELQRWKVEEQKKLEDSSMSSSPGEAVTSSSSSMAL…	ATGTCGAGGGTGAATTCAGAGAAGAAGCTGGGTGCAGGACGTGTGGTGGCTGTGGCAATTGAGAATAACAAGACAAGCCAACATGCTGCCAAATGGGCAGTGGACAATCTTCTTCCCAAAGACCAATGTCTCTTACTAATCCATGTTAGACAAAGACCATCTTCGGTTCCATCGTCGGATCATTTGAGCGAAGCTGTGGGCGACAACGAATCCAAGGAACTTTTTGAATCATTTCGAGTCTTCTGCAATAGAAAAAGTATACAATGCAAAGAAGTGCTGCTGGAGGACACGGATATATCTAAGGCATTAATAGACACCATTTCCACGAATACCATAGAGCTTCTTGTACTTGGGGCGCCCTCAAGGGGTGGCCTTGTTAGAAGATTTCGGACAACTGAT…
Chr01	GmHk_01G000018.1	292059	294245	+	-	hypothetical protein		IPR007650	PF04570			DUF581 domain containing protein, expressed	S	MENSNSNSRKPPKNGNRMILERGVVGLGIVAAMNSTDVVVSSAKAAANFRGTTTYDYGIFYASPLNNTGTRFPHFLNSCNLCDKHLHGVDIFIYRGEKAFCSAECRETHISISNDDHQDVVKCRSRVVEHNPVTLTSSILAAA	ATGGAGAATTCAAATTCTAATTCCAGAAAACCACCAAAGAATGGGAATAGGATGATTTTGGAGAGAGGGGTAGTTGGGTTGGGCATAGTAGCAGCCATGAACTCCACTGATGTTGTTGTCTCCTCTGCTAAAGCTGCTGCTAACTTTCGTGGAACCACAACCTATGACTATGGCATTTTCTATGCTTCCCCTCTCAACAATACTGGAACCCGCTTCCCTCATTTTCTCAATTCCTGCAATCTTTGCGACAAACATCTTCATGGGGTTGACATCTTCATTTACAGAGGCGAGAAAGCGTTTTGTAGTGCAGAATGCCGTGAGACACACATTAGCATTAGCAACGATGATCACCAAGACGTAGTCAAGTGCAGATCTCGTGTTGTAGAGCACAATCCTGTC…
Chr01	GmHk_01G000019.1	297356	302611	-	ARF5_1	Auxin response factor 5	GO:0003677;GO:0005515;GO:0005634;GO:0006355;GO:0009725	IPR003340;IPR010525;IPR015300;IPR033389	PF02309;PF02362;PF06507	cd10017		auxin response factor	K	MKKKSSIKAELWHACAGPLVKLPPSGTHVIYFPQGHSEQVSASLNRDVHSQIPNYPNLPSKLLCLLYSLTLHADPQTDQVYAQITLQPLPSFDKDALLRSDLALESTKPPPDFFCKHLTASDTSTHGGFSVPRRAAEKIFPPLDYSMQPPAQELVARDLHDTVWTFRHIYRGQPKRHLLTTGWSLFVSGKRLFAGDSVLFIRDEKQQLLLGIRRANRQPTNISSSVLSSDSMHIGILAAAAHAAANNSPFTVFYNPRASPSEFVIPLAKYYKSVYSHQPSLGMRFRMMFETEDSGTRRHMGTVTGISDLDPVQWKNSQWRNLQVGWDESTAGEKRSRVSIWEIEPVTAPFFICPPPFFRSKRPRQPGMPDDELSDFDNIFKRTMPWPGDDMCVKDPQGL…	ATGAAGAAGAAGAGCAGCATAAAGGCGGAGCTGTGGCACGCTTGTGCGGGGCCTTTGGTTAAGCTTCCTCCCTCCGGCACGCACGTCATCTACTTCCCTCAAGGTCACAGCGAACAAGTCTCTGCTTCTCTCAACAGAGATGTCCACTCTCAAATCCCCAACTATCCCAATCTCCCCTCCAAGCTACTCTGTCTCCTCTACTCTCTCACTTTGCATGCTGATCCCCAAACTGATCAAGTCTACGCTCAGATTACTCTTCAACCCCTCCCTTCTTTTGACAAGGATGCTCTCTTGAGATCTGATCTCGCTCTCGAATCCACCAAGCCACCACCTGACTTCTTCTGCAAACATCTTACCGCCAGTGATACTAGCACTCACGGTGGTTTCTCCGTCCCTCGC…
Chr01	GmHk_01G000019.2	297356	302611	-	ARF5_1	Auxin response factor 5	GO:0003677;GO:0005515;GO:0005634;GO:0006355;GO:0009725	IPR003340;IPR010525;IPR015300;IPR033389	PF02309;PF02362;PF06507	cd10017		auxin response factor	K	MKKKSSIKAELWHACAGPLVKLPPSGTHVIYFPQGHSEQVSASLNRDVHSQIPNYPNLPSKLLCLLYSLTLHADPQTDQVYAQITLQPLPSFDKDALLRSDLALESTKPPPDFFCKHLTASDTSTHGGFSVPRRAAEKIFPPLDYSMQPPAQELVARDLHDTVWTFRHIYRGQPKRHLLTTGWSLFVSGKRLFAGDSVLFIRDEKQQLLLGIRRANRQPTNISSSVLSSDSMHIGILAAAAHAAANNSPFTVFYNPRASPSEFVIPLAKYYKSVYSHQPSLGMRFRMMFETEDSGTRRHMGTVTGISDLDPVQWKNSQWRNLQVGWDESTAGEKRSRVSIWEIEPVTAPFFICPPPFFRSKRPRQPGMPDDELSDFDNIFKRTMPWPGDDMCVKDPQGL…	ATGAAGAAGAAGAGCAGCATAAAGGCGGAGCTGTGGCACGCTTGTGCGGGGCCTTTGGTTAAGCTTCCTCCCTCCGGCACGCACGTCATCTACTTCCCTCAAGGTCACAGCGAACAAGTCTCTGCTTCTCTCAACAGAGATGTCCACTCTCAAATCCCCAACTATCCCAATCTCCCCTCCAAGCTACTCTGTCTCCTCTACTCTCTCACTTTGCATGCTGATCCCCAAACTGATCAAGTCTACGCTCAGATTACTCTTCAACCCCTCCCTTCTTTTGACAAGGATGCTCTCTTGAGATCTGATCTCGCTCTCGAATCCACCAAGCCACCACCTGACTTCTTCTGCAAACATCTTACCGCCAGTGATACTAGCACTCACGGTGGTTTCTCCGTCCCTCGC…
Chr01	GmHk_01G000020.1	309750	313367	-	MBD2_3	Methyl-CpG-binding domain-containing protein 2	GO:0003677;GO:0005634;GO:0008270	IPR011124;IPR016177	PF01429;PF07496	cd01396		domain protein	S	MERRGELQQQHLLTFLSPKQAFLCVPPPPVRGCVNDLKLLVLKSENQMYHGKFSLTPKNEVKDLTGSSFPSYKHSSQLDPIDVSSSSDDENDLPNDDVSNQLVLYDPVANGNNAIELAPDPLQCEPPLLPRSKPSHSVPRALPSVGVFTVQCASCLKWRLIPTKEKYEEIREHIIEQPFVCQKAREWRPDVSCDDPEDISQDGSRVWAIDKPNIAQPPAGWERLLRIRAEGSSKFADIYYIAPSGKRLRSMVEVQKFLMEHPEYTRDGVTLSQFSFQIPRPLQENYVRKRSARLTSSYEVSEPVEHQQVSPLAWVDPEGCGGRLGLPPPPFMGSHDLDTTINMSISRPAKRQATHKGSL	ATGGAAAGGAGAGGAGAGCTTCAACAACAACATCTTCTTACGTTTCTGAGTCCGAAGCAAGCATTTTTGTGTGTTCCTCCCCCTCCCGTCAGGGGATGTGTCAATGACCTCAAGTTACTTGTTTTGAAATCAGAAAATCAGATGTATCACGGTAAATTTTCCCTTACACCCAAGAATGAAGTCAAGGACTTGACAGGTTCAAGTTTTCCCAGTTACAAACATAGCAGTCAGCTGGATCCCATAGATGTTTCTTCATCTTCAGATGATGAAAATGACCTTCCTAATGATGATGTGTCTAATCAATTAGTCCTTTATGATCCTGTGGCGAATGGAAACAATGCAATTGAACTTGCACCTGATCCTCTCCAGTGTGAACCTCCATTGCTTCCAAGAAGCAAA…
Chr01	GmHk_01G000020.2	309750	313367	-	MBD2_3	Methyl-CpG-binding domain-containing protein 2	GO:0003677;GO:0005634;GO:0008270	IPR011124;IPR016177	PF01429;PF07496	cd01396		domain protein	S	MERRGELQQQHLLTFLSPKQAFLCVPPPPENQMYHGKFSLTPKNEVKDLTGSSFPSYKHSSQLDPIDVSSSSDDENDLPNDDVSNQLVLYDPVANGNNAIELAPDPLQCEPPLLPRSKPSHSVPRALPSVGVFTVQCASCLKWRLIPTKEKYEEIREHIIEQPFVCQKAREWRPDVSCDDPEDISQDGSRVWAIDKPNIAQPPAGWERLLRIRAEGSSKFADIYYIAPSGKRLRSMVEVQKFLMEHPEYTRDGVTLSQFSFQIPRPLQENYVRKRSARLTSSYEVSEPVEHQQVSPLAWVDPEGCGGRLGLPPPPFMGSHDLDTTINMSISRPAKRQATHKGSL	ATGGAAAGGAGAGGAGAGCTTCAACAACAACATCTTCTTACGTTTCTGAGTCCGAAGCAAGCATTTTTGTGTGTTCCTCCCCCTCCCGAAAATCAGATGTATCACGGTAAATTTTCCCTTACACCCAAGAATGAAGTCAAGGACTTGACAGGTTCAAGTTTTCCCAGTTACAAACATAGCAGTCAGCTGGATCCCATAGATGTTTCTTCATCTTCAGATGATGAAAATGACCTTCCTAATGATGATGTGTCTAATCAATTAGTCCTTTATGATCCTGTGGCGAATGGAAACAATGCAATTGAACTTGCACCTGATCCTCTCCAGTGTGAACCTCCATTGCTTCCAAGAAGCAAACCTTCACATTCAGTTCCTAGAGCTTTGCCTTCAGTTGGTGTTTTC…
Chr01	GmHk_01G000020.3	309750	311056	-	MBD2_3	Methyl-CpG-binding domain-containing protein 2	GO:0003677;GO:0005634;GO:0008270	IPR011124;IPR016177	PF01429;PF07496	cd01396		domain protein	S	MYHGKFSLTPKNEVKDLTGSSFPSYKHSSQLDPIDVSSSSDDENDLPNDDVSNQLVLYDPVANGNNAIELAPDPLQCEPPLLPRSKPSHSVPRALPSVGVFTVQCASCLKWRLIPTKEKYEEIREHIIEQPFVCQKAREWRPDVSCDDPEDISQDGSRVWAIDKPNIAQPPAGWERLLRIRAEGSSKFADIYYIAPSGKRLRSMVEVQKFLMEHPEYTRDGVTLSQFSFQIPRPLQENYVRKRSARLTSSYEVSEPVEHQQVSPLAWVDPEGCGGRLGLPPPPFMGSHDLDTTINMSISRPAKRQATHKGSL	ATGTATCACGGTAAATTTTCCCTTACACCCAAGAATGAAGTCAAGGACTTGACAGGTTCAAGTTTTCCCAGTTACAAACATAGCAGTCAGCTGGATCCCATAGATGTTTCTTCATCTTCAGATGATGAAAATGACCTTCCTAATGATGATGTGTCTAATCAATTAGTCCTTTATGATCCTGTGGCGAATGGAAACAATGCAATTGAACTTGCACCTGATCCTCTCCAGTGTGAACCTCCATTGCTTCCAAGAAGCAAACCTTCACATTCAGTTCCTAGAGCTTTGCCTTCAGTTGGTGTTTTCACTGTTCAATGTGCATCCTGCTTGAAATGGAGGTTGATTCCAACAAAGGAAAAATATGAAGAAATACGTGAACATATCATTGAACAACCTTTTGTT…
Chr01	GmHk_01G000020.4	310208	311056	-	MBD2_3	Methyl-CpG-binding domain-containing protein 2	GO:0003677;GO:0005634;GO:0008270	IPR011124;IPR016177	PF01429;PF07496	cd01396		domain protein	S	MYHGKFSLTPKNEVKDLTGSSFPSYKHSSQLDPIDVSSSSDDENDLPNDDVSNQLVLYDPVANGNNAIELAPDPLQCEPPLLPRSKPSHSVPRALPSVGVFTVQCASCLKWRLIPTKEKYEEIREHIIEQPFVCQKAREWRPDVSCDDPEDISQDGSRVWAIDKPNIAQPPAGWERLLRIRAEGSSKFADIYYIAPSGKRLRSMVEVQKYMFLLLLLYYLCSVF	ATGTATCACGGTAAATTTTCCCTTACACCCAAGAATGAAGTCAAGGACTTGACAGGTTCAAGTTTTCCCAGTTACAAACATAGCAGTCAGCTGGATCCCATAGATGTTTCTTCATCTTCAGATGATGAAAATGACCTTCCTAATGATGATGTGTCTAATCAATTAGTCCTTTATGATCCTGTGGCGAATGGAAACAATGCAATTGAACTTGCACCTGATCCTCTCCAGTGTGAACCTCCATTGCTTCCAAGAAGCAAACCTTCACATTCAGTTCCTAGAGCTTTGCCTTCAGTTGGTGTTTTCACTGTTCAATGTGCATCCTGCTTGAAATGGAGGTTGATTCCAACAAAGGAAAAATATGAAGAAATACGTGAACATATCATTGAACAACCTTTTGTT…
Chr01	GmHk_01G000021.1	323814	328089	+	HKT1_0	Sodium transporter HKT1	GO:0006812;GO:0008324;GO:0055085		PF02386			Low-affinity potassium transport system. Interacts with Trk system potassium uptake protein TrkA (By similarity)	P	MMKSTLSYFSRSLRFLAGLIAFHFHSFFIQLCYLMILSLVGYLGLKVSKPRNPVRLNDLDLFYTSVSASTASSMVAVEMEVFSNSQLILFTLLMFLGGEVFTSMLDLLFAGYKLQNKVSINPFPPTNHANQIELGLVLSIPHSDSENNNPCDSNIINVASCDRLKYNCLSYLTYAVLGYLVMVQFVGFSFVSLYMTLVPSARQVLKNKGIKIVTFSLFTVVSTFASCGFVPTNENMLVFKKNSGLLLLILPHVFLGNALYPPCLRLLIMVLKKVTKKEEFSYLLKNSIDVGYEHLLSDLRCCFLVATVLGFNLIQFVMLCSLEWKTKIMEGLNVYEKVVASLFQVTNARHAGESVFDLSSISSAILVLFVVMMYLPPYTTFLPVREHEKDVNKRNEKSV…	ATGATGAAGAGTACACTCTCGTACTTTTCACGCAGCCTTCGATTCTTGGCTGGTTTGATAGCCTTCCATTTCCACTCCTTTTTTATTCAACTTTGTTATTTGATGATCCTTTCTCTGGTTGGTTACTTGGGTCTTAAGGTTTCAAAGCCAAGGAACCCTGTTAGGCTCAATGACTTGGACCTCTTTTACACCTCCGTTTCTGCTTCCACAGCTTCTAGCATGGTAGCCGTTGAAATGGAGGTTTTCTCCAATTCTCAACTCATTCTCTTCACCCTTCTCATGTTTCTTGGCGGGGAAGTTTTCACTTCCATGCTCGACCTTCTATTTGCTGGTTATAAATTACAAAACAAAGTTAGCATCAATCCTTTTCCACCCACAAATCATGCAAATCAAATAGAG…
Chr01	GmHk_01G000022.1	327958	331042	-	RTase_0	putative RNA-directed DNA polymerase from transposon BS		IPR000477	PF00078	cd01650		Retroelement	S	MLPTIAFFLSMNVFGDRGLEWLTKLFNEIMRSKRMPEEWRRNTLVPIYKNKGDIQNCANYRGIKLMSHTMKLWERVIERRLRKETQVTENQFGFMPGRSTMEAIYLLRRVMEQYRMDQQDLHLIFIDLEKAYDRVPREILWKALEKKGVRVSYIRAIQDMYDRIAPRCMLFADDIVLLGESREELNERLETWRRALETHGFRLSRSKSEYMECKFNKRRRVSNSEVKIGDHIIPQVTRFKYLGSVIQDDGEIEGDVNHRIQAGLMKWRKASGVLCDAKVPIKLKGKFYRTAVRPAILYGTECWAVKSQHENKVGVAEMRMLRWMCGKTRQDKIRNGAIRERVGVAPIVEKMVENRLRLFGHVERRPVDSVVRRVDQMERRQTIRGRGRPKKTIREVIKK…	ATGCTTCCAACAATAGCTTTTTTTTTATCTATGAATGTTTTTGGAGATAGAGGTCTTGAGTGGCTCACCAAACTCTTTAATGAAATTATGAGGTCAAAACGCATGCCGGAGGAATGGAGGAGAAACACGTTAGTGCCAATCTATAAGAACAAGGGGGATATACAAAATTGTGCAAATTATAGGGGAATCAAGCTCATGAGTCATACCATGAAATTATGGGAAAGAGTGATCGAACGGAGATTAAGAAAGGAGACTCAAGTTACTGAGAATCAATTTGGTTTCATGCCGGGAAGGTCGACCATGGAAGCGATTTATTTATTACGGCGGGTGATGGAGCAATATCGCATGGACCAACAAGACTTGCACTTGATTTTTATTGACCTGGAGAAAGCGTATGAT…
Chr01	GmHk_01G000023.1	335992	338245	+	PLA2-ALPHA_0	Phospholipase A2-alpha	GO:0004623;GO:0006644;GO:0050482	IPR036444		cd04706		Phospholipase A2	I	MVPTPQLKYVLLLFYCTFAFNLLSTPACALNIGAETTGVAVSVSKECSRQCESSFCSVPPLLRYGKYCGLLYSGCPGERPCDGLDACCMKHDQCVSAKNNDYLSQECSQTFINCMNNFKNSRAPTFKGNTCDADDVIEVIHVVMEAALLAGRVLHKP	ATGGTTCCAACCCCCCAACTCAAGTATGTTCTTCTCCTCTTTTATTGTACTTTTGCCTTTAACTTGTTATCCACTCCTGCCTGTGCCCTCAACATAGGAGCTGAAACCACTGGAGTCGCTGTCTCTGTGAGCAAAGAGTGCAGTAGACAATGCGAGTCAAGTTTCTGCTCAGTTCCTCCATTATTGAGATATGGCAAGTACTGTGGACTTTTGTATAGTGGATGCCCTGGGGAAAGACCTTGTGATGGCCTTGACGCTTGTTGTATGAAGCATGATCAATGTGTGTCAGCCAAAAACAATGACTACCTAAGCCAAGAGTGCAGTCAAACATTCATAAACTGTATGAATAACTTTAAGAACTCGAGGGCTCCTACATTCAAAGGAAACACGTGCGATGCG…
Chr01	GmHk_01G000024.1	340097	341208	-	OSB2_0	Protein OSB2, chloroplastic						single-stranded dna binding protein	S	MDVASLSFVVAIVHRLHLEEQELQNFPSQVIVMVQTLNFVQGYPQPNNSISINLKPEPEPEPKHSIPSAKRNRDSSSSSPWRDLVDNPMHWRDFRESKRNGLVKPRHPDFKRKDGHSLWLSKDNERVLPKLKGLQFDVPDSISKKGGGESWNDLVQNPDNWWDNRLNKVIPFSVLSLCS	ATGGACGTAGCGTCTCTGAGTTTTGTTGTTGCCATAGTCCATAGATTACATTTGGAAGAACAGGAACTGCAGAATTTTCCAAGTCAAGTTATTGTTATGGTACAAACCCTCAACTTTGTTCAAGGATATCCCCAACCCAACAACAGCATATCAATTAATTTGAAACCTGAACCTGAACCAGAACCAAAACACTCAATACCCAGTGCAAAGAGAAACCGGGATTCTTCTTCATCGAGTCCCTGGAGAGACCTTGTAGATAATCCCATGCATTGGCGTGATTTCCGTGAAAGCAAACGCAATGGATTGGTAAAACCAAGGCACCCTGATTTCAAACGCAAGGATGGACATTCTCTCTGGCTTAGCAAGGATAATGAACGGGTTTTACCTAAACTGAAAGGA…
Chr01	GmHk_01G000025.1	341967	343343	+	ENPP3_0	Ectonucleotide pyrophosphatase/phosphodiesterase family member 3	GO:0003824	IPR017850	PF01663	cd16018		type i phosphodiesterase nucleotide pyrophosphatase	S	MMAKESSSTSTSTPLLSSTNPSSTTFTSRILLLVASMFLLAAFVLALYFSSPTSSSPSLPPPRAKLPHPVVILISSDGFRFGYQFKTPAPNIQRLIKNGTEAETGLIPVFPTLTFPNHYSIVTGLYPPHHGIVNNVFFDPLTGEKFTMQSHQPKWWLAQPLWETVLLHNLSAATYFWPGSEVPKGPWTCPKAFCQPYNESVPFQDRVDTVLSYFDLPSHQVPSFITLYFEDPDHQGHQVGPDDSQITQAVAEIDAIVGRLIQGLEQRGVFQDVHLIMVGDHGMVGTCDKKLVFLDDLAPWIQIPRDWVQYLTPILSIRPPPSVDPAHVVAKMNEGLNSGKVENGAKLRVYLKEDLPRRLHYSASDRIPPIIGLADEGFKVEQNRTGEKECGGAHGYDNA…	ATGATGGCAAAAGAATCATCATCAACATCAACATCAACCCCTCTCCTCTCCAGCACTAACCCTTCTTCCACCACTTTCACTTCCCGCATTCTCCTCTTGGTCGCCTCCATGTTCCTCCTCGCAGCCTTCGTTCTCGCCCTCTACTTCTCCTCCCCAACGTCGTCGTCGCCGTCGCTGCCTCCGCCACGCGCCAAGCTCCCCCACCCGGTGGTGATCCTCATTTCCTCCGACGGCTTCCGATTCGGGTACCAGTTCAAGACCCCCGCTCCCAACATCCAGCGTCTGATAAAAAACGGCACCGAGGCCGAGACCGGACTCATCCCTGTCTTTCCCACCCTCACCTTCCCCAACCACTACTCCATCGTCACCGGGCTCTACCCTCCCCACCACGGCATCGTC…
Chr01	GmHk_01G000026.1	346776	349758	+	Os05g0200100_0	Thioredoxin-like 2, chloroplastic	GO:0045454	IPR017937;IPR036249	PF00085	cd02947		Thioredoxin	O	MAYVDVIRLQFQSSFFSPSPLSAKRLFSPLAYSSAPAPPATLAFAPRKQLLSFKVCATVAETGQPKWWEKNAPNMIDIHSTQEFLSALSQAGDRLVIVEFYGTWCASCRALFPKLCRTAEEHPEILFLKVNFDENKPMCKRLNVKVLPYFHFYRGAEGQLESFSCSLAKFQKIKDAMEIHNTARCSIGPPVSIGDLLAEPSSVAKDRPAESV	ATGGCATATGTTGATGTTATTCGATTACAATTTCAGTCCTCTTTCTTCTCCCCCTCACCACTCTCTGCTAAGAGGCTATTCTCTCCTCTCGCCTATTCTTCTGCCCCAGCGCCACCTGCTACTCTTGCTTTCGCGCCCAGAAAGCAATTGCTTTCTTTTAAGGTATGTGCAACTGTTGCTGAAACTGGTCAGCCAAAATGGTGGGAAAAGAATGCACCAAATATGATTGACATTCACTCCACGCAAGAATTTCTGAGTGCTTTGAGTCAAGCTGGAGATAGACTAGTTATTGTTGAATTTTATGGAACTTGGTGTGCTTCTTGCCGAGCATTATTCCCCAAGCTATGCAGAACAGCTGAAGAACACCCTGAAATTCTTTTCCTCAAAGTAAATTTTGAT…
Chr01	GmHk_01G000027.1	350664	351266	+	PRA1F2_0	PRA1 family protein F2		IPR004895	PF03208			Prenylated RAB acceptor	U	MTTYGTISEEAEPSSNSNSVFVSQAKEHIQGGLGTRRPWREMLQTSHFKFPSSFFGAIQRINTNAKHFRANYVIIILLVLFLSLLGHPISLIILIVMMIAWLYLYFLRDTPLVILRFEIDERLVVISLLLITIGLLVLTNVTYNVIVGICVALVIVLVHAMIRETEDLFTMDEDVGVMKGLRDIVKVPLRQPGSSSFTLS	ATGACCACATATGGAACGATCTCAGAAGAGGCAGAGCCTTCATCAAATTCAAACTCAGTTTTCGTTTCACAGGCCAAAGAGCACATTCAAGGTGGTCTAGGCACAAGAAGACCATGGAGGGAAATGCTCCAAACTTCTCATTTCAAATTTCCATCTTCCTTCTTCGGTGCAATCCAAAGAATCAACACAAATGCCAAACATTTTCGTGCAAACTACGTTATTATCATACTGCTTGTGCTTTTCCTTAGCTTACTAGGACACCCCATTTCTTTGATCATATTAATTGTTATGATGATTGCATGGCTGTACTTATATTTCTTACGAGATACCCCTTTGGTGATCTTGAGGTTTGAGATCGATGAGCGATTGGTGGTTATCTCTTTGTTGCTGATCACCATT…
Chr01	GmHk_01G000028.1	353136	356658	+	menG_0	Demethylmenaquinone methyltransferase	GO:0008168	IPR029063	PF08241			methyltransferase, type 11	S	MTNFVGLRLHTRLSLPLPLPVLGGASHSCSATATTLSRAVIRKWNWGIKGPRRMVLGLGLGVSFLSMAGTKSFIASAKIKGGPSVDEILKNVEWPEQFPFKEEEFQRFDETPDSLFYEAPRFVTHIDDPAIAALTKYYSKVFPPSNTPGVSILDMCSSWVSHFPSGYKQERVVGLGMNEEELKRNPVLTEYAVQDLNVNPKLPFEDNSFDLITNVVSVDYLTKPLDVFKEMCRILKPGGLAIMSFSNRCFWTKAISIWTSTGDADHVMIVGSYFHYAGGFEPPQAVDISPNPGRSDPMYIVYSRKLSTA	ATGACCAATTTTGTTGGACTAAGGTTGCATACGAGGTTGTCATTGCCATTGCCATTGCCAGTGTTGGGTGGTGCTTCTCACTCTTGTTCTGCCACTGCCACTACTCTGTCAAGAGCAGTAATAAGGAAGTGGAATTGGGGAATTAAGGGTCCTCGTCGTATGGTATTGGGCCTTGGACTTGGAGTTTCCTTCTTGTCTATGGCCGGTACCAAATCCTTCATTGCCTCGGCTAAGATAAAGGGTGGTCCCTCTGTGGATGAGATACTGAAGAATGTCGAATGGCCCGAGCAGTTCCCCTTCAAGGAGGAGGAATTCCAGCGCTTTGATGAGACACCAGATTCCTTGTTCTATGAAGCACCTCGATTTGTGACGCACATTGATGATCCTGCAATTGCTGCT…
Chr01	GmHk_01G000029.1	370234	371801	-	MYBS3_0	Transcription factor MYBS3	GO:0003676;GO:0003677;GO:0008270	IPR001878;IPR006447;IPR009057;IPR017930	PF00249	cd00167	TIGR01557	Transcription factor	K	MGRKCSHCGNIGHNSRTCASFRATNFVGVRLFGVQLADISSTSSNSLSMKKSFSMDSFPSSSSPSSSFSSSRTSIGYLSDSDGLIVGAQEIRKKGVPWTEEEHRTFLVGLEKLGKGDWRGISRNYVTSRTPTQVASHAQKYFIRLATMNKKKRRSSLFDMVGNGITNPISSSNCKSSKCEIEDDVTLSLVQLQDTKLDEQKDSDKYCEAGPAGAEHEAVPLWLHLQMKSSNNNVAAVVPDLELTLAVSKGKAKTLLGLEQTQTKSSPDSFLLGPISVT	ATGGGGAGAAAGTGCTCACATTGTGGAAACATAGGTCATAATTCCAGGACCTGTGCATCTTTCAGAGCAACTAATTTTGTAGGAGTTCGTCTTTTTGGGGTTCAACTAGCTGACATATCATCAACCTCTTCTAATTCTCTTTCCATGAAGAAAAGCTTTAGCATGGATTCCTTTCCCTCTTCATCCTCTCCATCTTCCTCCTTTTCTTCCTCAAGAACCTCTATTGGCTATCTATCAGATTCAGATGGCCTCATTGTTGGAGCACAAGAGATTAGGAAGAAAGGAGTACCATGGACAGAAGAAGAGCACCGAACGTTCCTTGTTGGACTTGAGAAGCTGGGAAAAGGTGATTGGAGGGGTATCTCTAGAAACTATGTGACTTCAAGAACCCCAACCCAA…
Chr01	GmHk_01G000030.1	376656	378635	+	-	hypothetical protein						NA	S	MAEEPKVPPPSNPTLSFDPSRTVGIIKRKALIKDLAAVYHAECLAYCQELLELQTKWEEPYIDLKTPEESKKETARPSKRVFRWLMHNSFREQNMHRQRIPFACCWCS	ATGGCGGAAGAACCGAAAGTTCCACCACCTTCCAATCCTACGTTGTCGTTTGATCCTAGTCGAACGGTTGGTATTATCAAGAGGAAGGCCTTGATCAAAGACTTAGCTGCGGTATACCATGCCGAATGCCTTGCATACTGTCAAGAGCTTTTGGAACTTCAAACTAAATGGGAAGAGCCATATATTGACTTAAAAACTCCAGAGGAATCAAAAAAGGAGACAGCACGACCCTCTAAACGTGTTTTCAGGTGGTTGATGCATAACTCATTTAGAGAGCAAAATATGCACCGTCAGAGGATACCTTTTGCTTGCTGCTGGTGTAGCTGA
Chr01	GmHk_01G000031.1	379376	382560	-	LPXA_1	putative acyl-[acyl-carrier-protein]--UDP-N-acetylglucosamine O-acyltransferase, mitochondrial	GO:0008610;GO:0008780	IPR010137;IPR011004;IPR029098;IPR037157	PF00132;PF13720			Involved in the biosynthesis of lipid A, a phosphorylated glycolipid that anchors the lipopolysaccharide to the outer membrane of the cell (By similarity)	M	MMNLGYVCVRGADGEKQSKDVVAPSLGVSIGPFCSVSASAKLGNGCQLYPGSHVFGITKLGDNCTLMTSYDDHPGCTVIGSNNTIGYHAVIGVKCQDMKYKPEDECYLEVGHNNDIREHSSIHRSSKSTDRTVIGNANFIMGSCHITHDCKIGNNNILANNTLLAGHVEVEDYVHTAGVTVVHQFCHLGSFSFLGGGSLVSQYVPKYMMAAGERAELRGLNLVGLTRCGFSVAEIRSMRAAYRKIFMCVDANAVSLEERLAEVEQHEELVHVPAMRAMLQSIRNSFAENRRGICKFRHWNAS	ATGATGAATTTGGGCTATGTCTGTGTGCGTGGTGCTGATGGTGAAAAGCAAAGCAAGGATGTGGTGGCTCCTTCTCTTGGTGTTTCGATTGGTCCCTTTTGTTCTGTTAGTGCCTCTGCAAAGCTGGGGAATGGCTGTCAACTATATCCCGGAAGCCATGTTTTTGGAATTACAAAGTTAGGGGACAATTGCACGTTGATGACTTCATATGATGATCATCCTGGATGTACCGTCATTGGAAGCAATAACACAATAGGATATCACGCTGTGATTGGTGTCAAATGTCAAGACATGAAATACAAGCCAGAGGATGAATGTTACCTGGAAGTTGGACATAATAATGATATTAGGGAACATTCTTCAATCCACCGATCTTCAAAATCAACCGATAGGACAGTT…
Chr01	GmHk_01G000031.2	379376	382560	-	LPXA_1	putative acyl-[acyl-carrier-protein]--UDP-N-acetylglucosamine O-acyltransferase, mitochondrial	GO:0008610;GO:0008780	IPR010137;IPR011004;IPR029098;IPR037157	PF00132;PF13720			Involved in the biosynthesis of lipid A, a phosphorylated glycolipid that anchors the lipopolysaccharide to the outer membrane of the cell (By similarity)	M	MMNLGYVCVRGADGEKQSKDVVAPSLGVSIGPFCSVSASAKLGNGCQLYPGSHVFGITKLGDNCTLMTSYDDHPGCTVIGSNNTIGYHAVIGVKCQDMKYKPEDECYLEVGHNNDIREHSSIHRSSKSTDRTVIGNANFIMGSCHITHDCKIGNNNILANNTLLAGHVEVEDYVHTAGVTVVHQFCHLGSFSFLGGGSLVSQYVPKYMMAAGERAELRGLNLVGLTRCGFSVAEIRSMRAAYRKIFMCVDANAVSLEERLAEVEQHEELVHVPAMRAMLQSIRNSFAENRRGICKFRHWNAS	ATGATGAATTTGGGCTATGTCTGTGTGCGTGGTGCTGATGGTGAAAAGCAAAGCAAGGATGTGGTGGCTCCTTCTCTTGGTGTTTCGATTGGTCCCTTTTGTTCTGTTAGTGCCTCTGCAAAGCTGGGGAATGGCTGTCAACTATATCCCGGAAGCCATGTTTTTGGAATTACAAAGTTAGGGGACAATTGCACGTTGATGACTTCATATGATGATCATCCTGGATGTACCGTCATTGGAAGCAATAACACAATAGGATATCACGCTGTGATTGGTGTCAAATGTCAAGACATGAAATACAAGCCAGAGGATGAATGTTACCTGGAAGTTGGACATAATAATGATATTAGGGAACATTCTTCAATCCACCGATCTTCAAAATCAACCGATAGGACAGTT…
Chr01	GmHk_01G000032.1	383697	385469	+	ET2_0	Protein EFFECTOR OF TRANSCRIPTION 2						NA	S	MKLCLYLQNGAFQKTGCSSYRIHNLPQLSVSGREIHKLAPNCIVVVHLGQAQNVRARLQRYGMTGAHLNDSSFPLFHQVFSQEFSILYRWAPMQNKEDALRTETQLLSTFDYAWNTSNNGIRRPDDILQKLHQIASGTRTLSDMARALLPFTQKQVGIQIKSIKLDEADNGSYNLLPRVFSFISLRSPDTLIPYHLQCSICVSDSVGHQHNTCSIF	ATGAAGCTGTGCCTCTATTTACAAAATGGAGCTTTCCAAAAAACTGGGTGTTCAAGCTACAGGATTCATAACCTCCCACAATTATCAGTGTCAGGGCGTGAAATTCACAAGCTTGCCCCTAACTGCATAGTGGTGGTTCACCTTGGACAAGCTCAAAATGTGAGAGCACGACTACAGCGTTACGGTATGACTGGGGCTCACTTGAATGATTCCTCTTTCCCCTTGTTTCACCAAGTCTTTTCACAAGAATTCTCAATCCTTTATAGATGGGCTCCTATGCAAAACAAGGAAGATGCCCTGCGAACAGAAACTCAGCTGCTCAGCACATTTGATTATGCATGGAACACGAGCAATAATGGTATCCGGAGGCCTGATGATATTCTTCAAAAGCTACATCAA…
Chr01	GmHk_01G000033.1	386781	388139	+	PCMP-H66_0	Pentatricopeptide repeat-containing protein At2g15690, mitochondrial	GO:0005515;GO:0008270	IPR011990;IPR032867	PF01535;PF13812;PF14432		TIGR00756	Pentatricopeptide repeat-containing protein	S	MELKLHTSMASIPRAVFTHSSSSIPFCAYAVPNASRRRNGTNNSRSTHKIPPLCKGNLPNEQKLQLDHQNQNAPLPLNVDLVSLCEEGNLDQVLELMGQGAVADYRVYLALLNLCEHTRSLESGKRVHEFLRRSTFRRDVELSNRLIGMYCKCGSVKDARRVFDQIPERNISSWHLMIGGYAANGLGCDGLLVFQQMKQAGVPPDGETFELVLAACAQAEAVEEGFLHFESMKEHGIVPSMEHYLEVINILGNTGQLNEAEEFIEKIPIELGVEAWESLRNFAQKHGDLDLEDHAEEVLTCLDPSKAVADKLPPPPRKKQSDMNMLEEKNRVTEYRYSIPYKEEAHEKLGGLSGQMREAGYVPDTRYVLHDIDEEEKEKALQYHSERLAIAYGLISTPP…	ATGGAACTCAAACTCCACACATCAATGGCTTCCATTCCACGCGCAGTCTTCACCCATTCCTCTTCATCCATTCCTTTCTGCGCCTACGCGGTCCCCAATGCGAGCAGGCGCCGAAACGGCACCAACAACAGTCGTTCCACTCACAAAATCCCTCCTTTGTGTAAGGGGAACCTTCCCAATGAACAGAAATTGCAGCTCGACCATCAAAACCAAAACGCCCCATTACCCTTGAATGTGGACTTGGTGTCCCTGTGTGAAGAGGGTAACCTTGATCAAGTATTGGAACTCATGGGTCAAGGTGCTGTTGCTGATTATCGCGTTTATCTCGCGCTCTTGAATTTGTGTGAGCATACAAGGTCGCTTGAATCGGGCAAAAGGGTCCATGAATTCCTGAGAAGA…
Chr01	GmHk_01G000034.1	389136	389645	-	COAC2_2	Mitochondrial carrier protein CoAc2		IPR018108;IPR023395	PF00153			Solute carrier family 25	S	MKRHVPEESNKSIMAKLTCGSVAGLLGQTITYPLEVVRRQMQVKKLLPSDYAELKGTLKSIVSISQKQGWKQLFSGLRINYIKVVPSVAIGFTVYDTMKSYLRVPSRDEAAVEN	ATGAAGCGCCATGTCCCCGAGGAGTCCAATAAAAGTATCATGGCCAAACTCACGTGTGGATCTGTGGCAGGGTTATTGGGTCAGACCATCACGTATCCTCTTGAAGTGGTTAGGAGGCAAATGCAGGTTAAAAAACTCCTGCCATCTGATTATGCTGAATTGAAGGGGACTCTTAAATCTATTGTTTCGATTTCCCAAAAGCAAGGCTGGAAGCAACTGTTTTCAGGGCTGAGAATCAATTACATAAAGGTTGTTCCATCTGTGGCCATCGGCTTTACAGTTTATGATACTATGAAATCATACCTGAGAGTTCCATCAAGAGATGAAGCTGCGGTTGAAAATTGA
Chr01	GmHk_01G000035.1	391657	393540	+	NDL1_0	Protein NDL1		IPR004142;IPR029058	PF03096			NDRG family member	S	MSCFQGLFFCPEAASLLLHNFCIYHISPPGNELGAAAICPDDPVPSAEDLADQIIEDLNYFRLGAVMCMGISSGAYILSLFATKYRERVLGLILVSPFCKSPSWTEWFYNKVMSNLLYFYGVCGLLKECLLQRYFSKEVRDNAEFPESEIVQASRKLLDERKGINVFRFLQVINEKVYLNRPILKPSYHIYVQQLVRRRPDIMEGLKRLKCGTLIFLGDSSPFHSEALHMTSKLARRYTALVEVQGCGSMVTEEQPHAMLVPMEYFLMG	ATGTCATGTTTCCAAGGATTATTTTTCTGTCCAGAGGCAGCTTCTTTGCTTCTTCACAACTTCTGCATATATCATATCAGTCCTCCTGGGAATGAGTTGGGAGCTGCTGCAATTTGTCCTGATGATCCAGTTCCTTCTGCTGAAGACTTAGCAGATCAAATAATTGAGGATCTCAATTATTTTCGGCTTGGTGCAGTGATGTGCATGGGAATATCGTCTGGTGCTTATATCCTTTCACTGTTTGCAACGAAATATAGGGAGCGTGTTCTTGGTTTAATACTTGTATCTCCCTTTTGCAAATCTCCTTCTTGGACTGAATGGTTTTATAACAAGGTGATGTCAAATTTGCTATATTTCTATGGTGTGTGTGGCTTGTTGAAAGAGTGTTTGCTCCAGCGG…
Chr01	GmHk_01G000036.1	394954	397484	-	-	hypothetical protein						NA	S	MEITGLVPLVGENYALKLKNSMQDLLAEIPKESPNFSPFVDAFYELMQAKVDSSFEVIWVYAAINFRGRNSEKGDALDRILAAKDLFKLLSACSASICASKSIALLAPVVFAMHGVIVELFGRELILKREKKAMREVKSLVDVVLGYISICCDNKVYKEETDSVNLILPFTDLARVSVDMNGDDEGFKSLLPLVSGDVCGWICSREFHGGYLGGAVIMEAFFMKLCLSFHLVTSRDELEMNLKSWAVGSISSFQNIHFLEILMRTTIETPLPLISILKPEDEILSRKVLFDAVLLVDYPFFYLNVKYIKNLTLTRLIVTHKAVEYFRGLGDQNRAVSYIKAFSASRLPLQIIKWVTSQNGLEEKTGRANGSSPRALINWLLSLENRGIRVFEDDVLKSH…	ATGGAGATCACCGGCTTGGTCCCTCTCGTGGGTGAGAACTACGCCCTCAAGCTGAAAAATTCCATGCAAGACCTTTTGGCCGAGATTCCTAAAGAATCCCCAAATTTTTCTCCTTTCGTCGATGCGTTTTACGAATTGATGCAAGCGAAGGTTGATTCATCCTTTGAGGTGATATGGGTCTACGCTGCAATTAACTTTCGTGGTCGTAACTCGGAGAAAGGTGATGCCTTGGATCGAATATTGGCCGCAAAAGACTTGTTTAAGTTGCTATCTGCGTGTTCGGCCTCTATTTGTGCTTCGAAGAGCATCGCTTTGCTGGCTCCTGTTGTTTTCGCGATGCACGGAGTGATTGTGGAGCTGTTTGGGAGGGAATTGATATTGAAGAGAGAGAAGAAAGCA…
Chr01	GmHk_01G000037.1	398323	403185	+	-	hypothetical protein		IPR008139				NA	S	MKMKGVLWVVVVSVVVAAWIPLSHCSKKPVGVARKEDIPYIKCQVCEKLAKELYQQVQNKQAEIAPKKISEYQIIEIAENVCNLKKVEADWILRIDIVEKEDRLELVEQDSEGQCNSECKTIERACQEVIGYSDTDVAEYLYNSKPDIDSLRNYLCKDLSKACSSKPPPVPKDRAPGEPFVAKSSKEAEMEKLLKSMEGMPGAPGMKMYSRDDLMNMKNFGGEDGDEEDEDDDDDEASFPSKLGNVLRAKESGKRDWKQMVKKGIEDASMTLKKHANKVSNHIRQWWRGKRRTNSKKGGKTEL	ATGAAGATGAAGGGGGTGTTGTGGGTTGTAGTTGTATCAGTGGTGGTTGCAGCATGGATTCCCCTTTCACACTGTTCAAAGAAACCGGTGGGGGTGGCTAGAAAGGAGGACATTCCGTACATCAAGTGTCAAGTGTGTGAGAAGCTCGCTAAAGAGTTGTATCAGCAGGTTCAAAACAAGCAAGCTGAGATCGCTCCCAAAAAGATCTCGGAGTACCAAATCATTGAGATAGCGGAGAATGTTTGTAATCTGAAAAAGGTAGAAGCGGATTGGATATTGCGCATAGATATTGTGGAGAAAGAAGATAGGCTGGAGCTGGTGGAACAAGACTCTGAAGGACAATGTAATTCTGAATGCAAGACAATTGAGCGAGCCTGTCAAGAGGTCATAGGATATTCT…
Chr01	GmHk_01G000038.1	404399	407089	-	PRMT1_1	putative protein arginine N-methyltransferase 1	GO:0006479;GO:0008168	IPR029063;IPR041698	PF13649	cd02440		Protein arginine n-methyltransferase	S	MGQRKNDNNINQCSSSKEDADMNNNHLRFEEAVDESSNLDQSMCDIEESDDKTSADYYFDSYSHFGIHEEMLKDTVRTKTYQNVIYQNKFLFKNKVVLDVGAGTGILSLFCAKAGAEHVYAVECSHMADMAKEIVEANGYSNVVTVLKGKIEEIELPVAKVDIIISEWMGYFLLFENMLNSVLYARDKWLVDGGVVLPDKASLHLTAIEDADYKEDKIEFWNNVYGFDMSCIKKQAIMEPLVDTVDQNQIATNCQLLKTMDISKMAPGDASFTVPFKLVAERDDYIHALVAYFDVSFTKCHKLMGFSTGPRSRATHWKQTVLYLEDVLTICEGEAIVGSMAVAPNKKNPRDVDIMLKYSLNGRRCNVSRVQYYKMR	ATGGGTCAGCGAAAGAACGACAACAACATCAATCAGTGCTCCTCAAGCAAGGAAGACGCTGACATGAATAACAACCACCTTCGCTTTGAAGAGGCTGTCGACGAGAGTTCCAACCTCGACCAATCCATGTGCGACATCGAAGAATCCGATGATAAAACCAGCGCCGACTATTACTTCGATTCCTACTCTCATTTTGGAATTCACGAAGAGATGTTGAAGGACACTGTGAGAACCAAGACATATCAAAATGTTATTTATCAGAACAAGTTTTTATTCAAGAATAAAGTAGTTCTTGATGTTGGTGCTGGGACTGGGATTTTATCACTATTTTGTGCCAAAGCAGGGGCAGAACACGTCTATGCGGTTGAGTGCTCCCACATGGCTGACATGGCAAAGGAG…
Chr01	GmHk_01G000038.2	404399	407089	-	PRMT1_1	putative protein arginine N-methyltransferase 1	GO:0006479;GO:0008168	IPR029063;IPR041698	PF13649	cd02440		Protein arginine n-methyltransferase	S	MGQRKNDNNINQCSSSKEDADMNNNHLRFEEAVDESSNLDQSMCDIEESDDKTSADYYFDSYSHFGDVEGHCENQDISKCYLSEQNKVVLDVGAGTGILSLFCAKAGAEHVYAVECSHMADMAKEIVEANGYSNVVTVLKGKIEEIELPVAKVDIIISEWMGYFLLFENMLNSVLYARDKWLVDGGVVLPDKASLHLTAIEDADYKEDKIEFWNNVYGFDMSCIKKQAIMEPLVDTVDQNQIATNCQLLKTMDISKMAPGDASFTVPFKLVAERDDYIHALVAYFDVSFTKCHKLMGFSTGPRSRATHWKQTVLYLEDVLTICEGEAIVGSMAVAPNKKNPRDVDIMLKYSLNGRRCNVSRVQYYKMR	ATGGGTCAGCGAAAGAACGACAACAACATCAATCAGTGCTCCTCAAGCAAGGAAGACGCTGACATGAATAACAACCACCTTCGCTTTGAAGAGGCTGTCGACGAGAGTTCCAACCTCGACCAATCCATGTGCGACATCGAAGAATCCGATGATAAAACCAGCGCCGACTATTACTTCGATTCCTACTCTCATTTTGGAGATGTTGAAGGACACTGTGAGAACCAAGACATATCAAAATGTTATTTATCAGAACAAAATAAAGTAGTTCTTGATGTTGGTGCTGGGACTGGGATTTTATCACTATTTTGTGCCAAAGCAGGGGCAGAACACGTCTATGCGGTTGAGTGCTCCCACATGGCTGACATGGCAAAGGAGATTGTTGAAGCTAATGGTTACTCT…
Chr01	GmHk_01G000039.1	417977	419803	+	ACS7_0	1-aminocyclopropane-1-carboxylate synthase 7	GO:0003824;GO:0009058;GO:0030170	IPR004839;IPR015421;IPR015422;IPR015424	PF00155	cd00609		aminotransferase	E	MGIEMEQPCVELSKVAVSETHGEDSPYFAGWKAYDENPYAELTNPSGVIQMGLAENQVSFDLLEKYLEEHSEASTWGKGAPGFRENALFQDYHGLKTFRTAMASFMEQVRGGRAKFDPQRVVLTAGATAANELLTFILANPGDALLVPTPYYPGFDRDLRWRTGVNIVPIHCDSSNNFQITPEALEAAYKDAEAMNSKVRGVLITNPSNPLGVTIPLSVLEEILDFVTRKNIHLVSDEIYSGSVFSSSEFFTSVAEVLEARQYRNAERVHIVYSLSKDLGLPGFRVGTIYSYNDKVVTTARRMSSFTLISSQTQHLLASMLSDKEFTENYIKTNRERLRKRNQMIIEGLRSAGIECLKGNAGLFCWMNLSPLLEKNKPKGREGELELWNAILHQVKLNI…	ATGGGTATTGAGATGGAGCAACCCTGTGTGGAGCTTTCAAAAGTTGCAGTTTCTGAAACTCACGGGGAAGATTCCCCTTATTTTGCTGGGTGGAAAGCCTATGATGAGAACCCCTATGCTGAATTAACCAATCCCTCAGGAGTTATTCAAATGGGGTTGGCAGAAAATCAAGTTTCGTTTGATTTGCTTGAAAAGTACTTGGAAGAGCATTCAGAAGCTTCCACATGGGGAAAAGGAGCTCCTGGCTTCAGAGAGAATGCTTTGTTTCAAGACTATCATGGGCTTAAAACCTTCAGAACAGCAATGGCAAGCTTCATGGAACAAGTGAGAGGTGGGAGAGCAAAATTTGACCCTCAAAGAGTAGTACTCACTGCTGGTGCAACTGCAGCCAACGAACTC…
Chr01	GmHk_01G000040.1	422110	424053	+	PLA2-GAMMA_0	Phospholipase A2-gamma	GO:0004623;GO:0006644;GO:0050482	IPR036444				Phospholipase A2	G	MSRAAASFGILLCLFLAAAAVVNCSDQANCSTTCIAEQCDTVGIKYGKYCGVGYWGCAGEKPCDDLDACCMAHDDCVDKFGMTHVKCHKKLKNCLTRELKSGKVGFSKECPYSRAAPTMIRGMDLAILLSQLGDSVPH	ATGTCACGCGCCGCTGCTTCATTCGGAATTCTCCTCTGTCTGTTCCTTGCCGCCGCCGCCGTCGTCAACTGCTCCGATCAGGCAAACTGCAGCACCACATGCATTGCGGAGCAGTGCGACACTGTTGGAATCAAATATGGCAAGTATTGCGGGGTGGGGTACTGGGGTTGTGCTGGCGAGAAACCATGCGATGATCTTGATGCTTGCTGCATGGCCCATGACGACTGCGTTGACAAATTCGGAATGACTCATGTGAAATGTCATAAGAAATTAAAGAATTGCCTAACCAGGGAACTGAAATCTGGTAAGGTTGGATTTTCCAAGGAGTGTCCCTACAGCAGAGCTGCACCTACGATGATAAGAGGCATGGACTTGGCCATCTTGCTAAGCCAATTGGGT…
Chr01	GmHk_01G000041.1	425654	430181	+	DDB_G0289029_0	IST1-like protein	GO:0015031		PF03398			positive regulation of collateral sprouting	S	MLHRSFKPAKCKTTLKLAVSRIKLLKNKREAQIKQLKRELAQLLESGQDRTARIRVEHVVREEKTMAAYDLVEIYCELIAARLPMIESQKNCPIDLKEAVSSVIFASPRCSDLPELMDVKKQITSKYGKEFVSAAIELRPDCGLVEKLSAKAPDGPTKIKILAAIAEEHNIKWEPKSLGENDVKSSQDFLVGPSTSEKVAYAEPSQIHVPPAHDEKGPSNLHAPSQVKPVHHSSTNSYEQTASGAARKDQSTTSGVSNSEVGSSGTGSQETKFQDSYSGNNSSFPMNRQNWSMEFKDAASAAEAAAESAERASMAARAAAELSNRENMTRQYSSGSHSSSRSGLRDERSQEYTFHDDKNLSTSPVDASFHRSSSGMHNEQITATEQDNLVGPPNEYYRN…	ATGTTGCATAGAAGCTTCAAGCCCGCAAAGTGCAAAACGACATTGAAGCTCGCCGTTTCACGCATAAAGCTTTTGAAGAACAAGAGAGAAGCCCAAATAAAGCAACTCAAGAGAGAGTTGGCTCAATTGCTTGAGTCTGGTCAGGACCGAACTGCTAGAATCCGGGTTGAACATGTTGTCAGAGAAGAGAAAACGATGGCAGCTTATGATCTTGTTGAGATATACTGTGAACTTATCGCCGCACGCTTGCCCATGATCGAATCACAAAAAAACTGCCCCATTGACTTGAAGGAAGCAGTTTCAAGTGTAATATTTGCATCTCCGAGATGTTCAGACCTACCAGAGCTCATGGATGTGAAGAAGCAAATCACATCTAAGTATGGAAAAGAATTTGTCTCA…
Chr01	GmHk_01G000042.1	432675	434297	+	At4g26220_0	putative caffeoyl-CoA O-methyltransferase At4g26220	GO:0008171	IPR029063	PF01596	cd02440		O-methyltransferase	S	MENIKDPSIYRNPVILQSEDLTKYILETAVYPREPAPLKELREATNNHPWGFIATLPEAGQLMTLLLKLLNPKKTIEVGVFTGYSLLLTALNIPHDGKITAIDINRKTYEVGLPVIKKAGVEHKIDFIESPALPILDKLLEDPANEGSFDFAFIDADKENYVNYHERLIKLVKIGGLLVYDNTLWGGRVCWPEDKVPPHARSGRDAAIEFNKTITNDSRVEFALTSVGDGLNICRRVA	ATGGAAAACATCAAAGATCCATCAATTTACCGCAATCCAGTCATATTGCAGAGCGAGGACTTAACCAAGTATATTCTGGAAACTGCTGTTTACCCTAGAGAACCTGCGCCTCTAAAAGAGCTGAGGGAAGCCACTAATAATCACCCTTGGGGCTTCATTGCTACTTTACCTGAAGCGGGTCAGCTAATGACCTTACTTTTGAAGCTGTTGAATCCCAAAAAGACCATTGAAGTGGGAGTGTTTACTGGTTATTCCCTTCTCCTCACCGCACTCAACATTCCTCATGATGGAAAGATTACAGCCATAGATATTAACAGGAAAACTTATGAGGTTGGTTTACCAGTCATCAAAAAGGCTGGAGTTGAGCACAAGATTGATTTCATAGAGTCTCCAGCTCTA…
Chr01	GmHk_01G000043.1	436242	437440	+	RPL31_0	60S ribosomal protein L31	GO:0003735;GO:0005840;GO:0006412	IPR020052;IPR023621	PF01198	cd00463		(ribosomal) protein	J	MVEKAKGRKEEVVTRDTFKKKAPKAIKEIRKFAQKAMGTNDVRVDVKLNKFVWSQGIRSVPRRIRVRIARKRNDDEDAKEELYSLVTVVEIPKDELKGLGTKRGLEYCGSTMILGHPLITIAYKDC	ATGGTGGAGAAGGCGAAGGGTAGAAAGGAGGAGGTGGTTACACGTGACACATTTAAGAAGAAAGCTCCTAAAGCTATTAAGGAGATAAGGAAATTTGCCCAAAAGGCCATGGGGACCAATGATGTGAGGGTGGATGTGAAGTTGAACAAGTTTGTCTGGAGCCAGGGAATCAGGAGTGTTCCAAGGAGGATTAGAGTAAGAATTGCTCGCAAGAGAAATGATGATGAAGATGCCAAGGAAGAGCTGTACTCTCTTGTTACCGTTGTTGAGATCCCTAAGGACGAGCTCAAAGGGTTAGGCACTAAGCGGGGATTGGAGTATTGTGGAAGCACAATGATACTTGGACACCCTTTAATTACAATAGCATATAAGGATTGCTAA
Chr01	GmHk_01G000044.1	438370	439668	-	PCMP-H57_0	Pentatricopeptide repeat-containing protein At3g14330	GO:0005515	IPR011990	PF01535;PF13812		TIGR00756	Pentatricopeptide repeat-containing protein	S	MLPAISLPTNITVKTNITATSTPRTTNTHKLKTTLKSLCKWGNLDEALRLIESSKPTPIEEEESISLLLHACISRRSLEHGRKLHLHLLRSQNRVLENPTLKAKLITLYSVCGRVNEARRVFRTGDENIPEEPVWPGNFAFSIALKACSDSGNALVGRAIHAQIVKHDVEEADQVVNNALLGLYVEIGCFHEVLKVFEAMPQRNVVSWNTLIASFAGQGRMFETLAAFRVMQREGMGFSWITLTTVLPVCAQITAPLSGKEVHGQILKSRKNADVPLLNSLMDMYGIEPDGITFVALLSGCSHLGLTSEGKRLFNVMQDFGVQPSLEHYACLVDILGRSGKLDEALSVQRTFR	ATGCTCCCCGCCATTTCTCTTCCAACCAACATAACCGTCAAAACGAACATAACAGCCACTTCCACACCCAGAACCACAAATACACACAAACTCAAAACAACCCTAAAATCTCTCTGCAAATGGGGAAATTTGGACGAAGCTCTTCGCCTAATCGAATCATCGAAGCCCACACCCATTGAAGAAGAAGAAAGCATCTCTCTCCTCCTCCACGCGTGCATCTCCAGAAGGTCCTTGGAACATGGCCGAAAACTCCACTTGCACTTGCTTCGTTCTCAAAACAGAGTCTTGGAGAACCCCACTTTAAAGGCCAAGCTCATCACGCTGTATTCCGTTTGTGGCAGAGTCAACGAGGCTCGTCGCGTGTTCCGAACTGGCGATGAGAACATCCCAGAAGAACCT…
Chr01	GmHk_01G000045.1	441461	443423	+	VPS32.2_1	Vacuolar protein sorting-associated protein 32 2	GO:0007034		PF03357			Charged multivesicular body protein	U	MFSRMFGKPKQETNAVATLDKLNETLEMLEKKEKVLLKKVAAEVEKAKEFTRGKNKRAAIQCLKRKRLYEQQIEQLGNFQLRIHDQMIMLEGAKATTETVDALRTGAAAMKAMQKATNIDDVDKTMDEINEQTENMKQIQDALSAPIGAAADFDEDELEAELEELEGAELEEQLLQPATTAPAAPVQVPAGQQPTRPVPAKRTPEEDELAALQAEMAL	ATGTTTAGCCGGATGTTCGGTAAACCTAAACAGGAAACCAATGCTGTTGCCACTTTGGACAAGCTAAACGAGACACTTGAAATGCTGGAGAAAAAGGAGAAAGTGCTCCTTAAAAAGGTGGCAGCAGAAGTTGAAAAGGCCAAAGAATTCACAAGGGGGAAGAACAAAAGGGCGGCAATACAATGTCTGAAGAGGAAGAGGTTATATGAACAGCAAATAGAGCAGCTTGGAAATTTCCAGTTGCGTATTCATGACCAGATGATAATGTTGGAAGGTGCTAAAGCCACCACAGAAACGGTAGACGCGTTAAGAACTGGAGCAGCTGCTATGAAGGCTATGCAAAAAGCAACGAATATTGATGATGTTGACAAGACTATGGATGAGATCAATGAACAGACT…
Chr01	GmHk_01G000045.2	441461	443423	+	VPS32.2_1	Vacuolar protein sorting-associated protein 32 2	GO:0007034		PF03357			Charged multivesicular body protein	U	MFSRMFGKPKQETNAVATLDKLNETLEMLEKKEKVLLKKVAAEVEKAKEFTRGKNKRAAIQCLKRKRLYEQQIEQLGNFQLRIHDQMIMLEGAKATTETVDALRTGAAAMKAMQKATNIDDVDKTMDEINEQTENMKQIQDALSAPIGAAADFDEDELEAELEELEGAELEEQLLQPATTAPAAPVQVPAGQQPTRPVPAKRTPEEDELAALQAEMAL	ATGTTTAGCCGGATGTTCGGTAAACCTAAACAGGAAACCAATGCTGTTGCCACTTTGGACAAGCTAAACGAGACACTTGAAATGCTGGAGAAAAAGGAGAAAGTGCTCCTTAAAAAGGTGGCAGCAGAAGTTGAAAAGGCCAAAGAATTCACAAGGGGGAAGAACAAAAGGGCGGCAATACAATGTCTGAAGAGGAAGAGGTTATATGAACAGCAAATAGAGCAGCTTGGAAATTTCCAGTTGCGTATTCATGACCAGATGATAATGTTGGAAGGTGCTAAAGCCACCACAGAAACGGTAGACGCGTTAAGAACTGGAGCAGCTGCTATGAAGGCTATGCAAAAAGCAACGAATATTGATGATGTTGACAAGACTATGGATGAGATCAATGAACAGACT…
Chr01	GmHk_01G000046.1	449033	451646	-	MND1_0	Meiotic nuclear division protein 1	GO:0003690;GO:0007131	IPR040453;IPR040661	PF03962;PF18517			meiotic nuclear divisions 1 homolog (S. cerevisiae)	D	MSKKRGLSLEEKREKMLQIFYESQDFYLLKELEKMGPRKGVISQSVKDVVQSLVDDDLVSKDKIGTSVYFWSLPSCAGNQLRNVSRKLDSDLESSKKRHAQLVDQCEELKKGREESDERVEAIADLKAIEQKHNELKDELAKYKDNDPAAFEAMKEAIAVAHASANRWTDNIFTLRQWCSNNFPQAKEQLENLYKEVGITDDFDYLELAPVPLKTVAD	ATGTCAAAGAAAAGGGGCCTCTCATTGGAAGAGAAGCGCGAGAAGATGCTTCAAATCTTTTACGAGTCGCAAGACTTCTACCTGCTTAAGGAGCTCGAGAAGATGGGTCCCAGGAAGGGTGTCATTTCTCAGTCTGTGAAAGATGTGGTCCAAAGTTTAGTGGATGATGACCTTGTTTCCAAAGATAAAATAGGAACTTCTGTGTACTTTTGGAGTCTACCTAGCTGTGCTGGTAATCAGCTTAGGAATGTGTCCCGCAAACTTGATTCTGATCTAGAAAGCAGTAAGAAGCGGCATGCCCAACTTGTTGATCAATGTGAGGAGCTAAAGAAGGGGCGAGAGGAATCTGATGAAAGAGTGGAGGCCATTGCAGATCTAAAAGCCATTGAGCAAAAGCAT…
Chr01	GmHk_01G000047.1	453865	459319	+	At4g29180_3	putative LRR receptor-like serine/threonine-protein kinase At4g29180	GO:0004672;GO:0005515;GO:0005524;GO:0006468	IPR001245;IPR001611;IPR008271;IPR011009;IPR017441;IPR024788;IPR032675	PF07714;PF12819;PF13855	cd14066		Serine Threonine protein kinase	T	MPSSIGCILLLTLCDLVLVALVHAQQQIGFISIDCGGTPTNNEYTDEITNIRYTTDGAYIQTGVNKNISSEYAYPKNPNLPLLLSDLRSFPLGERNCYRLVAGKRGELHLIRASFLYGNYDGENKPPEFDLYVDVNFWSTVKFRNASEEVTMEIISVAQSGVTHVCLVNKGAGTPFISGLELRPLNSSIYDTEFGESASLSLFKRWDIGSTNGSGRYEDDIYDRIWSPFNSSSWESVNTSTPINVNDDGYRPPFKVIRTAARPRNGSDTLEFSWTPDDPSWKFYVYLYFAEVEQLEKTQLRKFNIAWNGSPLFDDSLIPRHLFATTLSNSKSLVANEHKISIHKTKDSTLPPILNAVEIYVARQLDALATFEEDVDAILSIKENYRIQRNWVGDPCEPK…	ATGCCAAGTTCGATCGGGTGCATACTGTTGCTGACACTTTGTGACCTTGTCCTCGTAGCTTTAGTTCATGCACAGCAACAAATAGGCTTCATAAGCATTGATTGCGGGGGTACTCCAACCAATAATGAGTACACAGATGAAATAACTAACATAAGGTACACCACTGATGGAGCCTATATACAAACTGGGGTTAATAAGAACATTTCCTCCGAGTATGCATACCCTAAGAATCCTAATCTGCCACTTCTACTCTCAGATCTCAGAAGCTTTCCTCTGGGAGAAAGGAACTGTTATAGGTTAGTAGCTGGAAAAAGAGGCGAGTTACATTTGATAAGGGCTTCCTTCTTGTATGGAAACTATGATGGAGAAAACAAGCCACCAGAGTTTGATCTCTATGTT…
Chr01	GmHk_01G000047.2	453865	457886	+	At4g29180_3	putative LRR receptor-like serine/threonine-protein kinase At4g29180	GO:0004672;GO:0005515;GO:0005524;GO:0006468	IPR001245;IPR001611;IPR011009;IPR017441;IPR024788;IPR032675	PF07714;PF12819;PF13855			Serine Threonine protein kinase	T	MPSSIGCILLLTLCDLVLVALVHAQQQIGFISIDCGGTPTNNEYTDEITNIRYTTDGAYIQTGVNKNISSEYAYPKNPNLPLLLSDLRSFPLGERNCYRLVAGKRGELHLIRASFLYGNYDGENKPPEFDLYVDVNFWSTVKFRNASEEVTMEIISVAQSGVTHVCLVNKGAGTPFISGLELRPLNSSIYDTEFGESASLSLFKRWDIGSTNGSGRYEDDIYDRIWSPFNSSSWESVNTSTPINVNDDGYRPPFKVIRTAARPRNGSDTLEFSWTPDDPSWKFYVYLYFAEVEQLEKTQLRKFNIAWNGSPLFDDSLIPRHLFATTLSNSKSLVANEHKISIHKTKDSTLPPILNAVEIYVARQLDALATFEEDVDAILSIKENYRIQRNWVGDPCEPK…	ATGCCAAGTTCGATCGGGTGCATACTGTTGCTGACACTTTGTGACCTTGTCCTCGTAGCTTTAGTTCATGCACAGCAACAAATAGGCTTCATAAGCATTGATTGCGGGGGTACTCCAACCAATAATGAGTACACAGATGAAATAACTAACATAAGGTACACCACTGATGGAGCCTATATACAAACTGGGGTTAATAAGAACATTTCCTCCGAGTATGCATACCCTAAGAATCCTAATCTGCCACTTCTACTCTCAGATCTCAGAAGCTTTCCTCTGGGAGAAAGGAACTGTTATAGGTTAGTAGCTGGAAAAAGAGGCGAGTTACATTTGATAAGGGCTTCCTTCTTGTATGGAAACTATGATGGAGAAAACAAGCCACCAGAGTTTGATCTCTATGTT…
Chr01	GmHk_01G000047.3	453865	457177	+	At4g29180_3	putative LRR receptor-like serine/threonine-protein kinase At4g29180	GO:0005515;GO:0005524	IPR011009;IPR017441;IPR024788;IPR032675	PF12819;PF13855			Serine Threonine protein kinase	T	MPSSIGCILLLTLCDLVLVALVHAQQQIGFISIDCGGTPTNNEYTDEITNIRYTTDGAYIQTGVNKNISSEYAYPKNPNLPLLLSDLRSFPLGERNCYRLVAGKRGELHLIRASFLYGNYDGENKPPEFDLYVDVNFWSTVKFRNASEEVTMEIISVAQSGVTHVCLVNKGAGTPFISGLELRPLNSSIYDTEFGESASLSLFKRWDIGSTNGSGRYEDDIYDRIWSPFNSSSWESVNTSTPINVNDDGYRPPFKVIRTAARPRNGSDTLEFSWTPDDPSWKFYVYLYFAEVEQLEKTQLRKFNIAWNGSPLFDDSLIPRHLFATTLSNSKSLVANEHKISIHKTKDSTLPPILNAVEIYVARQLDALATFEEDVDAILSIKENYRIQRNWVGDPCEPK…	ATGCCAAGTTCGATCGGGTGCATACTGTTGCTGACACTTTGTGACCTTGTCCTCGTAGCTTTAGTTCATGCACAGCAACAAATAGGCTTCATAAGCATTGATTGCGGGGGTACTCCAACCAATAATGAGTACACAGATGAAATAACTAACATAAGGTACACCACTGATGGAGCCTATATACAAACTGGGGTTAATAAGAACATTTCCTCCGAGTATGCATACCCTAAGAATCCTAATCTGCCACTTCTACTCTCAGATCTCAGAAGCTTTCCTCTGGGAGAAAGGAACTGTTATAGGTTAGTAGCTGGAAAAAGAGGCGAGTTACATTTGATAAGGGCTTCCTTCTTGTATGGAAACTATGATGGAGAAAACAAGCCACCAGAGTTTGATCTCTATGTT…
Chr01	GmHk_01G000047.4	457294	459319	+	At4g29180_3	putative LRR receptor-like serine/threonine-protein kinase At4g29180	GO:0004672;GO:0005524;GO:0006468	IPR001245;IPR008271;IPR011009	PF07714			Serine Threonine protein kinase	T	MWYPSLVILIMITDGAHTCVHGLQAELLMTVHHKNLVSFVGYCDDDNKMALIYEYMANGSLKDFLLLSDGNSHCLSWERRIQIAIDAAEGLDYLHHGCKPPIIHRDVKSANILLSQDFEAKIADFGLSREFRKDNQDQQFQVIHKDATYEKSAVMGTTGYLDPEYYKLGRLNEKSDIYSFGIVLLELLTGRPAILKGNRVMHILEWIRPELERGDLSKIIDPRLQGKFDASSGWKALGIAMSCSTSTSIQRPTMSIVIAELKQCLKLESPSDTKTFVAPPRQVYDEVYSSSEAFSYDSESITSPFPR	ATGTGGTATCCTTCATTGGTTATTTTGATTATGATAACAGATGGCGCTCATACATGTGTACATGGTTTGCAGGCTGAGCTTTTGATGACAGTTCATCACAAAAATTTGGTATCCTTCGTTGGCTACTGTGATGATGATAACAAGATGGCACTCATTTACGAGTACATGGCCAATGGCAGCCTGAAAGATTTTCTCTTGCTCTCAGATGGAAATTCACATTGCTTGAGTTGGGAAAGGAGAATACAGATAGCAATCGATGCTGCAGAGGGGTTGGATTACCTACACCATGGATGCAAGCCACCAATAATACACAGGGATGTAAAGTCAGCCAACATTCTTTTAAGTCAAGACTTTGAAGCTAAGATAGCAGATTTTGGCCTCTCCAGGGAGTTTAGGAAA…
Chr01	GmHk_01G000048.1	464414	465764	-	MYB36_0	Transcription factor MYB36	GO:0003677	IPR009057;IPR017877;IPR017930	PF00249	cd00167		Myblike DNAbinding domain containing protein	K	MGRAPCCDKSNVKRGPWSPDEDATLKNYLEKHGTGGNWIALPKKAGLKRCGKSCRLRWLNYLRPHIKLGGFTEEEDKIICTLYDTIGSRQVHYFFFFLYMNVLNMWSFIAAQLPGRTDNDVKNHWNTKLKKKFLAGNTSSTAATTSNNNVTFSNTSYSDQVKTLVLDHQKLNSADNWFDYSYNVLELEQTPIPVPFPMSQELEAFNYTAGSISCSAPPPSKEVSMLSNADNHTLWFGYDHASEDDPNLLEFVLDDDLLNHGFVSQDKSCSQVGPPSG	ATGGGAAGGGCTCCATGTTGTGACAAATCCAATGTGAAAAGAGGGCCTTGGTCTCCTGATGAAGATGCCACCCTCAAAAACTACCTTGAGAAACATGGCACAGGTGGTAACTGGATAGCTCTCCCCAAAAAAGCAGGCCTTAAGCGTTGTGGGAAGAGCTGTCGTCTAAGATGGCTAAACTATCTCAGGCCTCATATTAAGCTTGGAGGTTTCACTGAAGAGGAAGACAAAATTATCTGCACCCTTTATGACACCATCGGAAGCAGGCAAGTCCATTATTTTTTTTTTTTTTTATATATGAACGTATTGAATATGTGGTCCTTTATAGCAGCTCAACTTCCCGGGAGAACAGACAATGATGTGAAAAATCACTGGAACACCAAGCTAAAGAAAAAGTTC…
Chr01	GmHk_01G000049.1	471786	472838	-	At2g19810_0	Zinc finger CCCH domain-containing protein 20	GO:0046872		PF00642			zinc finger CCCH domain-containing protein	S	MMLGEHHRGNPTVLVPPWPAHDDPTAEMYSAFLTNDVNAGEYSPYHLQEALTALQRFLPSNETDADSDSSEAAQPDAAVDAYTCDHFRMYEFKVRRCARGRSHDWTECPYAHPGEKARRRDPRRFHYSGVACPEFRKGNCRKGDACEFAHGVFECWLHPARYRTQPCKDGTSCRRRVCFFAHTPEQLRVLPMQSPRSVANSSESYDGSPMRQVSLSSAAAAAFMSSPAASLSPPESPPSVNEMVASLRNLQLGKMKSMPHNRNVSVGSPRGSVLRPGFLSLPTTPTQQPVRSGVKCFDVWDESFEEEPVMERVESGRGIRAKMFEKLSKENSLDASASPPDLGWVSELVK	ATGATGCTCGGAGAACACCATCGCGGGAATCCGACGGTCCTCGTGCCACCGTGGCCAGCCCACGACGATCCGACGGCTGAGATGTACTCCGCGTTCTTAACAAACGACGTCAATGCTGGTGAGTACTCTCCGTACCATCTTCAAGAAGCACTAACGGCGCTGCAGCGTTTTCTGCCGTCAAACGAAACGGACGCAGACTCGGACTCCTCGGAGGCGGCTCAGCCCGACGCGGCGGTGGACGCGTACACGTGCGACCATTTCCGCATGTACGAGTTCAAGGTCCGTCGATGCGCACGTGGCAGGTCACACGACTGGACGGAGTGTCCGTACGCGCATCCCGGCGAGAAGGCCCGCCGCCGTGACCCGCGGAGGTTCCACTACTCTGGCGTGGCGTGCCCG…
Chr01	GmHk_01G000050.1	498001	500808	-	-	hypothetical protein	GO:0008270	IPR006564;IPR007527;IPR018289	PF03108;PF04434;PF10551			transposon protein	S	MAPPKEIPTLIYHSGHIVDDPVQGSTYQCTTPIFFYASRSITFTQFIRKINNRLPTRATEQVAQLLFRVPISIHLGQTRFISAQLFDNDDLRGAMETIIQNPQLNSAEFYVVTELISQPQPSSPQPSCPQLQLPPPQQLPYNNIDLNNPVSSYNNLESQDPFDIYTSYTQILSENDSFFHGQQTSFDQQNHPSSPFTPPSQLPQTQTSNRDEHPIANEDPIIRFHHENMDDFTEDEDQQFFDHINQQSDDQSDDQTDDEGVGRPTTPPSPPLQYQQPRCPVDLNFDHLPHYIDRPHFVHQQHNVQPSVGVLEVGMTFDDKSQCIRAIKEYNIRNHFDCRTIYSDQRRIHFVCKLHENGCTWSLGACNSKRHNKWIIKSIRGHHTCLVPMLTQDHRQLDK…	ATGGCTCCACCTAAAGAAATTCCGACCCTCATTTACCACAGTGGTCACATTGTAGACGATCCAGTTCAAGGATCGACGTACCAATGTACGACCCCAATATTTTTTTACGCCAGTCGTTCTATTACGTTTACACAATTCATTCGAAAAATTAACAATCGTCTTCCTACTCGAGCAACTGAACAAGTTGCTCAATTGTTATTTCGTGTCCCTATTTCAATTCATCTCGGTCAGACACGTTTTATTTCGGCTCAACTATTCGACAATGATGATCTTAGAGGCGCGATGGAAACAATTATCCAGAATCCACAATTGAATTCTGCCGAATTCTATGTTGTTACTGAGCTTATTTCTCAACCACAACCATCGTCTCCACAACCCTCATGTCCACAACTACAACTA…
Chr01	GmHk_01G000051.1	502776	504614	+	MAIL3_0	Serine/threonine-protein phosphatase 7 long form		IPR019557	PF10536			Serine threonine-protein phosphatase 7 long form	S	MDDKPLLRHQHVHRSRTTINELITSYYHTIPEPEPQIIQLLSSTGFQHIALIKQCKIDPALITALVERWRPETHTFHLPWGECTITLEDVALHLGIRVDGRVVTGPSFLHWDELCHELLGEVPPENARKGAALKLTWLLNMLRAPLPEEPTTHQLQCRCRAYIMYMIGGALIPDKSGNRVHLMYLNLLRDLNKTKKYSWGSACLANLYRELCRASSEVGKSMGGCVILLQPWAWYHMPFIAPRVPRPETTFPLAKRWSGGRLEYRATPHGDLVGYRSRIDHMESHEFSWIPYRGFEEHLPRCAYRDMEIWSACTAIICFSIVEWHQTNRVKLQFGLQQDIPVDPMNLDLLHQIDMRGNHYTDWMEYHAEWINIWKNKHNDILAGQWVEGIVTHTPTYME…	ATGGATGATAAACCTCTATTGCGTCATCAACATGTTCATCGTTCACGTACTACGATTAATGAGTTAATCACTTCCTATTACCATACAATACCTGAACCAGAACCACAAATTATACAATTATTATCGTCTACCGGGTTCCAACATATTGCCTTAATCAAACAGTGTAAAATTGATCCTGCATTGATCACTGCATTGGTTGAACGATGGAGGCCTGAAACACATACCTTTCACCTGCCATGGGGAGAGTGCACCATCACACTCGAAGATGTTGCACTTCATCTAGGCATTAGAGTCGATGGTCGTGTTGTGACTGGACCTAGCTTCTTACATTGGGATGAGTTATGCCACGAGTTACTAGGGGAAGTCCCTCCCGAAAATGCACGTAAAGGAGCCGCACTG…
Chr01	GmHk_01G000052.1	511777	514139	+	MIOX2_1	Inositol oxygenase 2	GO:0005506;GO:0005737;GO:0019310;GO:0050113;GO:0055114		PF05153			inositol oxygenase	S	MVVLIEQSELTRPQAEENNDDLVLDGGFSLLKSPSHVGFTVPDINSYGHSFRNYYDESERNKSVEELYRQQHTNQTYEFAKKMREEYGKLNKVEVGIWECCEMLDKIVDASDPDLEESQIQHALQTAEAARNDYPNEDWLHLTALIHDLGKVLLLPSFGGLPQWAVVGDSFPLGCAFHEANTHFKYFKDNPDSNNPAYNTKKGIYDEGCGLDNVMMSWGHDEYMYLVTKGNNTTLPSEALFIIRYHSFHPLYQTGAYKHLYSEEDVKNLKWLEIFHKYDLYSKSNVLIDVEKVKPYYMSLIKKVGNKTCVMPYFPPKLIW	ATGGTCGTTCTCATCGAGCAATCAGAGCTAACAAGACCGCAAGCTGAGGAGAACAATGATGATTTGGTATTGGATGGTGGTTTTTCCTTGCTCAAATCACCTTCACATGTTGGATTTACAGTCCCTGATATCAATTCATATGGTCACTCCTTCAGAAATTATTATGATGAAAGCGAAAGGAATAAGTCTGTGGAGGAACTTTACCGACAACAACACACGAATCAAACATATGAATTTGCTAAGAAGATGAGAGAGGAATATGGGAAACTGAATAAAGTAGAAGTGGGTATATGGGAATGTTGTGAGATGCTTGATAAAATTGTGGATGCAAGTGATCCTGATTTAGAAGAATCTCAAATTCAGCATGCATTGCAGACAGCTGAAGCTGCTAGAAATGAC…
Chr01	GmHk_01G000052.2	511777	514139	+	MIOX2_1	Inositol oxygenase 2	GO:0005506;GO:0005737;GO:0019310;GO:0050113;GO:0055114		PF05153			inositol oxygenase	S	MVVLIEQSELTRPQAEENNDDLVLDGGFSLLKSPSHVGFTVPDINSYGHSFRNYYDESERNKSVEELYRQQHTNQTYEFAKKMREEYGKLNKVEVGIWECCEMLDKIVDASDPDLEESQIQHALQTAEAARNDYPNEDWLHLTALIHDLGKVLLLPSFGGLPQWAVVGDSFPLGCAFHEANTHFKYFKDNPDSNNPAYNTKKGIYDEGCGLDNVMMSWGHDEYMYLVTKGNNTTLPSEALFIIRYHSFHPLYQTGAYKHLYSEEDVKNLKWLEIFHKYDLYSKSNVLIDVEKVKPYYMSLIKKYFPPKLIW	ATGGTCGTTCTCATCGAGCAATCAGAGCTAACAAGACCGCAAGCTGAGGAGAACAATGATGATTTGGTATTGGATGGTGGTTTTTCCTTGCTCAAATCACCTTCACATGTTGGATTTACAGTCCCTGATATCAATTCATATGGTCACTCCTTCAGAAATTATTATGATGAAAGCGAAAGGAATAAGTCTGTGGAGGAACTTTACCGACAACAACACACGAATCAAACATATGAATTTGCTAAGAAGATGAGAGAGGAATATGGGAAACTGAATAAAGTAGAAGTGGGTATATGGGAATGTTGTGAGATGCTTGATAAAATTGTGGATGCAAGTGATCCTGATTTAGAAGAATCTCAAATTCAGCATGCATTGCAGACAGCTGAAGCTGCTAGAAATGAC…
Chr01	GmHk_01G000053.1	520114	522478	+	GGT3_2	Glutathione hydrolase 3		IPR029055	PF01019			gamma-glutamyltransferase activity	E	MCVNVNKQNMYQNNPKDKTLGPLSMGVPGELAGLHAAWLKHGRLPWKTLFQPAIELAENGFVVTPTLGEYMAGDANKILDDPGLRKLYAPNGTLLKAGDVCRNVELGRTLEVVAEQGPQAFYNGTIGENLVKDVRDAGGILMMEDLRNYKLEVTDATTVNVMGYTVYGMPPPSSGTLALSLVLNILDSYGGPDAARGNLGLHRLIEALKHMLAVRMNLGDPNFVNIDDTIYKMLSPSFAKDIQHMIFDNTTFPPEYYMNRWSQLRDHGTSHMCIVDADRNAVSLTTTVNNHFGAGFRSTSTGILVNNEMDDFSTPTDISPDKLPPAPANFIEPNKRPLSSMTPLIITKDDQLVGVLGGSGGMNIIAAVVQVFLNHFILGMKPLDAVVSPRIYHKLMPNV…	ATGTGTGTGAATGTCAACAAACAGAATATGTATCAGAACAATCCCAAAGATAAGACCTTAGGTCCATTGTCAATGGGAGTTCCTGGTGAATTAGCTGGCCTTCATGCAGCCTGGTTGAAGCATGGACGATTGCCGTGGAAAACCTTGTTCCAACCAGCTATAGAACTTGCTGAAAATGGTTTTGTAGTTACTCCTACTCTTGGGGAGTACATGGCTGGTGATGCAAATAAGATATTAGATGATCCTGGGTTAAGAAAACTATATGCACCCAATGGAACTTTGTTGAAAGCAGGGGATGTGTGTAGAAATGTTGAACTTGGTCGCACCTTGGAGGTTGTGGCAGAGCAAGGACCACAAGCTTTCTACAATGGAACCATTGGTGAAAATTTAGTCAAGGAT…
Chr01	GmHk_01G000053.2	518487	522478	+	GGT3_2	Glutathione hydrolase 3	GO:0006751;GO:0036374	IPR029055	PF01019		TIGR00066	gamma-glutamyltransferase activity	E	MWSPQNNIMDSPLLSQNHVLPNKHTWKMILCAIVAITIVGLVVRGNTSYGILSRAEKYNDGIATNQGDIVESEVGVVATDDSRCSTIGVSMLRQGGHAVDAAVAAALCIGVVFSASSGIGGGAFMVVRSSSTSQTEAFDMRETAPLAASQNMYQNNPKDKTLGPLSMGVPGELAGLHAAWLKHGRLPWKTLFQPAIELAENGFVVTPTLGEYMAGDANKILDDPGLRKLYAPNGTLLKAGDVCRNVELGRTLEVVAEQGPQAFYNGTIGENLVKDVRDAGGILMMEDLRNYKLEVTDATTVNVMGYTVYGMPPPSSGTLALSLVLNILDSYGGPDAARGNLGLHRLIEALKHMLAVRMNLGDPNFVNIDDTIYKMLSPSFAKDIQHMIFDNTTFPPEYY…	ATGTGGAGCCCTCAAAACAACATCATGGATTCTCCTTTGTTGTCACAAAACCATGTTTTGCCCAACAAACACACATGGAAAATGATCCTTTGTGCTATCGTGGCTATCACAATTGTTGGACTAGTAGTCAGAGGCAACACTAGCTATGGAATACTGTCCAGAGCAGAAAAATATAATGATGGAATCGCAACCAATCAGGGAGATATTGTTGAATCAGAGGTGGGAGTTGTTGCAACTGATGATTCTCGGTGTTCTACAATTGGTGTTTCAATGCTTAGGCAGGGTGGACATGCTGTTGATGCTGCAGTGGCAGCTGCATTATGCATTGGTGTTGTTTTCTCAGCATCAAGTGGTATAGGAGGTGGCGCTTTCATGGTTGTTCGATCTTCTTCAACCTCT…
Chr01	GmHk_01G000053.3	518487	519907	+	GGT3_2	Glutathione hydrolase 3		IPR029055	PF01019			gamma-glutamyltransferase activity	E	MWSPQNNIMDSPLLSQNHVLPNKHTWKMILCAIVAITIVGLVVRGNTSYGILSRAEKYNDGIATNQGDIVESEVGVVATDDSRCSTIGVSMLRQGGHAVDAAVAAALCIGVVFSASSGIGGGAFMVVRSSSTSQTEAFDMRETAPLAASQV	ATGTGGAGCCCTCAAAACAACATCATGGATTCTCCTTTGTTGTCACAAAACCATGTTTTGCCCAACAAACACACATGGAAAATGATCCTTTGTGCTATCGTGGCTATCACAATTGTTGGACTAGTAGTCAGAGGCAACACTAGCTATGGAATACTGTCCAGAGCAGAAAAATATAATGATGGAATCGCAACCAATCAGGGAGATATTGTTGAATCAGAGGTGGGAGTTGTTGCAACTGATGATTCTCGGTGTTCTACAATTGGTGTTTCAATGCTTAGGCAGGGTGGACATGCTGTTGATGCTGCAGTGGCAGCTGCATTATGCATTGGTGTTGTTTTCTCAGCATCAAGTGGTATAGGAGGTGGCGCTTTCATGGTTGTTCGATCTTCTTCAACCTCT…
Chr01	GmHk_01G000054.1	524841	526538	-	At2g19790_0	AP-4 complex subunit sigma	GO:0015031	IPR016635;IPR022775	PF01217			Adaptor-related protein complex	U	MGIRFVLMVNKQGQTRLAQYYEYLTLEERRALEGEIVRKCLARNEQQCSFVEHRNYKIVYRRYASLFFLVGVDDDENELAILEFIHLLVETMDRHFGNVCELDIMFHLEKAHFMLEEMVMNGCIVETSKSNILTPIQLMDKTS	ATGGGGATCCGATTCGTACTGATGGTGAACAAGCAAGGCCAAACTCGTCTTGCTCAATATTACGAATACCTCACTCTCGAAGAGCGACGTGCCCTCGAAGGCGAAATCGTTCGCAAATGCCTCGCCCGCAACGAACAGCAGTGTTCCTTTGTTGAGCATCGCAACTACAAAATTGTTTATCGGCGCTACGCCTCTTTGTTTTTCCTCGTTGGAGTCGACGATGATGAGAATGAGCTGGCAATTTTGGAATTTATACATCTCTTGGTTGAAACTATGGATCGTCATTTCGGCAATGTGTGCGAGCTAGATATTATGTTCCATTTAGAAAAGGCGCATTTTATGTTGGAGGAGATGGTCATGAATGGTTGTATTGTGGAGACAAGCAAATCAAATATTTTG…
Chr01	GmHk_01G000055.1	530334	534970	-	PFK3_0	ATP-dependent 6-phosphofructokinase 3	GO:0003872;GO:0005524;GO:0006002;GO:0006096	IPR012004;IPR022953;IPR035966	PF00365			phosphohexokinase	G	MDSSSSSPNNNNNHHASTTKTNGFLIHPKLGFEPARSRSRLAMASPANTSEPKIVTGTAGYILEDVPHFTDYIPNLPTYPNPLQDNPAYSVVKQYFVHVDDSVPQKVVVHKDGARGVHFRRAGPRQKVYFEADEVQAAIVTCGGLCPGLNTVIRELVCGLHHMYGVKKVLGINGGYRGFYARNTITLTPKSVNDIHKRGGTVLGTSRGGHDTKKIVDSIQDRGINQVYIIGGDGTQKGASAIFEEVRKRGLKVSVVGIPKTIDNDIPVIDKSFGFDTAVEEAQRAINAAHVEAESVENGIGVVKLMGRNSGFIAMYATLASRDVDCCLIPESPFYLEGPGGLYEYIEKRLKENGHMVIVIAEGAGQELVSESVQSMSKQDASGNKLFQDVGLWISQKIR…	ATGGATTCTTCTTCTTCTTCTCCAAACAACAACAACAACCACCACGCTTCCACAACCAAAACCAACGGTTTCCTAATTCATCCCAAGCTGGGTTTCGAACCTGCCAGGTCTCGATCACGTCTTGCCATGGCTTCACCTGCCAACACCTCCGAGCCTAAGATCGTCACCGGCACAGCCGGTTACATCCTCGAAGACGTTCCGCATTTCACTGATTACATTCCCAATCTCCCAACATACCCTAATCCTTTGCAAGACAACCCTGCTTATTCAGTTGTTAAGCAGTATTTTGTGCATGTTGATGACAGCGTTCCTCAAAAGGTCGTTGTTCACAAAGATGGTGCAAGAGGGGTACATTTTAGGCGTGCTGGGCCTCGTCAAAAGGTGTACTTTGAAGCAGAT…
Chr01	GmHk_01G000056.1	551781	556382	+	NAC075_1	NAC domain-containing protein 75	GO:0003677;GO:0006355	IPR036093	PF02365			nac domain	S	MSKISNLSSVSSSDLIDAKLEEHQLCGSKQCPGCGHKFEGKPDWLGLPAGVKFDPTDQELIEHLEAKVEAKNMKSHPLIDEFIPTIEGEDGICYTHPEKLPGVTRDGLSRHFFHRPSKAYTTGTRKRRKIQNECDLQGGETRWHKTGKTRPVMVNGKQKGCKKILVLYTNFGKNRKPEKTNWVMHQYHLGQHEEEKEGELVVSKIFYQTQPRQCNWSDRSATTGEGSGEPNNSGRRDSGSGSCSSKEIVTHRDEMSAVVGVPPMTSFTHHHPLDIQQLKPDHFSFIPFRKSFDERMQVGIGEASTAREVMQASGSCEEVHERHLAQVTPHHHQLQQHAHHHQISNSAFHISRPSHPISTIISPPPLHHTSIILDDNSYHVSRIMLQNENFQQQQQQHHK…	ATGAGTAAGATCAGCAACTTGAGTTCTGTAAGCAGTTCTGATCTCATAGATGCCAAGCTTGAAGAGCATCAGTTGTGTGGATCCAAGCAGTGCCCCGGTTGCGGACACAAGTTTGAAGGGAAGCCGGATTGGCTAGGCTTGCCCGCAGGAGTGAAGTTTGATCCCACAGACCAAGAACTAATAGAACATCTTGAAGCCAAAGTGGAGGCAAAGAACATGAAATCACACCCTTTGATAGATGAGTTCATTCCCACTATTGAAGGAGAAGATGGAATTTGTTATACCCATCCGGAGAAACTTCCAGGAGTAACAAGAGATGGGTTGAGCAGGCACTTCTTCCATAGACCTTCAAAGGCTTACACAACTGGGACAAGAAAGAGGAGAAAAATTCAAAACGAA…
Chr01	GmHk_01G000056.2	551781	556382	+	NAC075_1	NAC domain-containing protein 75	GO:0003677;GO:0006355	IPR036093	PF02365			nac domain	S	MSKISNLSSVSSSDLIDAKLEEHQLCGSKQCPGCGHKFEGKPDWLGLPAGVKFDPTDQELIEHLEAKVEAKNMKSHPLIDEFIPTIEGEDGICYTHPEKLPGVTRDGLSRHFFHRPSKAYTTGTRKRRKIQNECDLQGGETRWHKTGKTRPVMVNGKQKGCKKILVLYTNFGKNRKPEKTNWVMHQYHLGQHEEEKEGELVVSKIFYQTQPRQCNWSDRSATTGEGSGEPNNSGRRDSGSGSCSSKEIVTHRDEMSAVVGVPPMTSFTHHHPLDIQQLKPDHFSFIPFRKSFDERMQVGIGEASTAREVMQASGSCEEVHERHLAQVTPHHHQLQQHAHHHQISNSAFHISRPSHPISTIISPPPLHHTSIILDDNSYHVSRIMLQNENFQQQQQQHHK…	ATGAGTAAGATCAGCAACTTGAGTTCTGTAAGCAGTTCTGATCTCATAGATGCCAAGCTTGAAGAGCATCAGTTGTGTGGATCCAAGCAGTGCCCCGGTTGCGGACACAAGTTTGAAGGGAAGCCGGATTGGCTAGGCTTGCCCGCAGGAGTGAAGTTTGATCCCACAGACCAAGAACTAATAGAACATCTTGAAGCCAAAGTGGAGGCAAAGAACATGAAATCACACCCTTTGATAGATGAGTTCATTCCCACTATTGAAGGAGAAGATGGAATTTGTTATACCCATCCGGAGAAACTTCCAGGAGTAACAAGAGATGGGTTGAGCAGGCACTTCTTCCATAGACCTTCAAAGGCTTACACAACTGGGACAAGAAAGAGGAGAAAAATTCAAAACGAA…
Chr01	GmHk_01G000057.1	565853	567697	+	LRX4_0	Leucine-rich repeat extensin-like protein 4	GO:0005515	IPR013210;IPR032675	PF08263;PF13855			Leucine-rich repeAt	S	MFLEIVRNRKQIQPIQPQLWSRCRHKHLQILDVVVKIKKFTFKGSQHLYRKSCTKLKMENSCILAFLLLILHSSTTKAAFSVGGGVGVGVGVGVGVGNGNGGGDGGSGGVVWVGGGINSPEPPRSSVPNLEGAYTALQAWKSAITEDPLKILSSWVGPNVCAYKGVFCANPQDEMVASAFPVVAGIDLNHANLKGTLVKELSLLSDLSLLHLNSNRFTGTVPDTFRDLVFLEELDLSNNQLSGPFPAATLYMPGLIYLDLRFNYFSGPLPQELFSKNLDALFLNNNQFEGEIPQNLGSSPASVINLANNKLSGSIPASLGFMGSKIKEILFLNNQLTGCIPEGVGLFTEMQVLDVSFNSLMGHLPDTLSCLQDIEVLNLAHNKLSGELSDVVCSLRSLA…	ATGTTTCTTGAAATTGTGAGAAATCGCAAACAAATACAGCCGATTCAACCACAATTATGGTCTCGTTGCAGGCACAAACACTTACAAATTCTTGACGTTGTGGTCAAAATCAAGAAATTTACATTCAAAGGAAGTCAACATCTGTACAGAAAAAGTTGTACAAAGCTAAAAATGGAGAATAGCTGCATTCTAGCTTTTCTCCTCCTCATTCTCCACTCAAGTACAACAAAAGCTGCCTTCAGTGTTGGTGGTGGAGTTGGTGTAGGTGTTGGTGTTGGTGTTGGTGTTGGCAATGGGAATGGTGGTGGTGATGGTGGCAGTGGTGGAGTGGTTTGGGTTGGTGGAGGGATTAACAGCCCAGAGCCACCTAGATCCTCAGTGCCAAATCTTGAAGGAGCT…
Chr01	GmHk_01G000058.1	568893	572660	-	APS1_0	Acid phosphatase 1		IPR005519;IPR014403;IPR023214;IPR036412	PF03767			Acid phosphatase	S	MSSLPASLRLYNELLGLGFKIFILTGKKEHQRGFTEKNLQPVGYTKWERLILGFEIFNETSFDNWVDLAAAPALPASLSLYNELKELGFKIFLLTGRSEFQRNATGANLLSSGYRDWERLILRRDRTRDLFSLLSLLTIQLTLYLPCLVLLNKFHLKFLLNETGSSDQGKPATTYNSEKRAELENEGYRIHGNSGDQWSDLGGYAVAARSFKLPNPTYYIP	ATGTCCAGTTTGCCGGCCAGTTTGAGATTGTATAACGAACTTCTCGGATTGGGTTTCAAGATATTTATCTTAACTGGAAAGAAGGAGCATCAAAGAGGTTTTACGGAGAAAAATCTTCAACCTGTCGGGTACACAAAATGGGAGAGGCTCATATTAGGATTTGAGATCTTCAATGAGACTTCCTTTGATAATTGGGTGGACTTAGCTGCAGCCCCAGCTTTGCCAGCTAGTTTGAGTTTGTATAACGAGCTTAAGGAATTGGGCTTCAAGATATTCCTCTTAACTGGGAGAAGTGAATTTCAAAGGAATGCCACAGGGGCAAACCTTCTGAGTTCAGGGTACAGAGATTGGGAGAGGCTCATCTTAAGGAGGGATCGAACCCGGGACCTTTTCTCCTTG…
Chr01	GmHk_01G000059.1	573766	577851	-	-	hypothetical protein		IPR010410	PF06219			stress-induced protein	S	MDPCPFVRLMVDSLALNLPSATKPPPVSGVHPSTTPCFCQIRITNFPSQTALLPLSSSSSGDANPEAATSAPGFHLDSAALRRLSAKPLTLRLAVYSGSTARACGISSAKLLGRLNLTLDLSAALFRPNTFHSGWLNLRKNRTGFEPEHKPAPRVHVVVRSEPDPRFVFQFGGEPECSPVVFQIQENNIRQPVFSCKFSADRNSRSRCLPSDFANNPSRWRRTLKGIRERHGRERKGWMIMIHDLSGSPVAAASMITPFVPSPGSDRVSRSNPGAWLILRPNNGASVSSWKPWGRLEAWRERGPVDGLGYKFELVTENGPANGIPIAEATMNVKKGGQFCIDYKVMRDSGLGSRLKGKGFVMGSTVEGEGKVSKPVVQVGAQHVTCMADAALFIALSAA…	ATGGATCCCTGTCCCTTCGTGCGTCTCATGGTAGACTCTTTAGCTCTCAACCTTCCCTCCGCCACCAAACCGCCACCTGTCTCCGGCGTCCACCCTTCCACTACCCCATGCTTCTGCCAAATCCGCATCACCAATTTCCCCTCTCAAACCGCGCTTCTTCCACTCTCTTCTTCCTCCTCCGGCGACGCCAACCCCGAAGCCGCAACCTCCGCCCCGGGCTTCCACCTCGACTCCGCCGCGCTCCGTCGCCTCTCCGCCAAACCTCTCACCCTCCGCCTCGCCGTCTACTCCGGCAGCACCGCCCGCGCCTGCGGCATCTCCTCCGCCAAACTCCTCGGCCGCCTCAACCTCACCCTCGACCTCTCCGCCGCGCTCTTCCGCCCCAACACCTTCCACTCC…
Chr01	GmHk_01G000060.1	583576	585801	+	PROF4_0	Profilin-4	GO:0003779	IPR027310;IPR036140	PF00235	cd00148		Binds to actin and affects the structure of the cytoskeleton. At high concentrations, profilin prevents the polymerization of actin, whereas it enhances it at low concentrations (By	O	MSWQTYVDDHLMCDIDGTGHHLSSSAIIGHDGSVWAQSSSFPQIKSDEINGIMKDFDEPGHLAPTGLHLGGTKYMVIQGEPGAVIRGKKGSGGITIKKTGQALVFGIYDEPVTPGQCNMIVERLGDYLVDQGL	ATGTCGTGGCAAACTTACGTAGATGACCACTTGATGTGCGATATCGATGGCACAGGACACCACCTCTCCTCCTCTGCCATCATCGGCCACGACGGCTCCGTCTGGGCTCAGAGTTCTTCCTTCCCTCAGATTAAGTCTGATGAGATCAATGGTATCATGAAAGATTTTGATGAACCTGGTCATCTTGCTCCTACTGGCCTCCACCTTGGAGGCACCAAATACATGGTAATACAAGGAGAGCCAGGAGCCGTCATTCGTGGGAAGAAGGGATCTGGAGGTATCACCATAAAGAAAACTGGTCAAGCATTAGTTTTCGGCATATATGATGAACCTGTTACTCCTGGACAATGCAACATGATTGTTGAGAGGTTGGGAGATTACCTTGTTGATCAGGGTCTG…
Chr01	GmHk_01G000061.1	591600	592412	+	-	hypothetical protein						NA	S	MNQNAQNFYLGMDVKRIMDGDRVGNTNWVIKEDGVEDSNDSSSIGFNSEDSICSSSSSELAEDASSSTSSNSPTHSNGPLFELSDLMSHLPIKRGLSMFYQGKAQSFTSLARVESIEDLPKKGTPYSKRMKSCKSFGGGLNSQRLLCSPKSTISKKTSRGSFASVLSKRGSFLGGSRYSIAVQQKNF	ATGAATCAGAATGCACAGAATTTTTATCTGGGGATGGATGTGAAGAGAATCATGGATGGTGATAGAGTTGGGAACACTAATTGGGTAATTAAGGAAGATGGTGTAGAAGATAGCAACGATTCATCATCCATTGGATTCAACTCAGAAGATTCTATTTGCTCTTCTTCTTCATCAGAGTTGGCCGAGGACGCTTCATCTTCAACATCTTCTAATTCACCAACACATTCAAATGGACCTTTGTTTGAATTATCAGACCTCATGAGCCACCTCCCTATTAAGAGAGGGTTATCTATGTTCTATCAAGGGAAGGCCCAGTCTTTCACTTCTTTAGCAAGGGTGGAGAGCATAGAAGATCTTCCCAAGAAAGGCACACCTTATAGTAAGAGAATGAAATCATGC…
Chr01	GmHk_01G000062.1	593612	604129	-	EMB1027_1	Arginine--tRNA ligase, chloroplastic/mitochondrial	GO:0000166;GO:0004812;GO:0004814;GO:0005524;GO:0005737;GO:0006418;GO:0006420	IPR001412;IPR005148;IPR008909;IPR009080;IPR014729;IPR035684;IPR036695	PF00750;PF03485;PF05746	cd00671	TIGR00456	arginyL-tRNA synthetase	J	MLGLGCLNLNRFSHFPSPPSLPSSRSDLLKVASRRFALSVTKTQQSPEIDNPASVKRQLAQLFDLSLRATVPDEPDVVPLIDACAVKGGVKFGDYQCNNAMGIWSKMKGKQTGFRGPPAIGQAIVNNLPPSEMIDSCSVAGPGFVNVVLSKKWIAESLQRMLIDGINSWAPRLPVKRALIDFSSPNIAKEMHVGHLRSTIIGDTLARMLEFSRVECVIRRNHVGDWGTQFGMLITNLFEKFPNPDDVSEADIGDLQAFYKASKVRFDSDPEFKLRAQQAVVRLQSGEIKYRKAWKQICDVSRAEFDKVYQRLGVQLEERGESFYNPYIPGVLEKLDNLGLIEESDGARVIYVEGVDIPLIAVKRDGGYNYFTTDLASLWYRLNEEKLEWIVYVTDIGQQ…	ATGTTAGGGTTAGGATGCTTAAACCTCAATCGATTCTCTCACTTCCCATCCCCTCCCTCTCTACCATCCTCTCGTTCCGATTTACTTAAGGTTGCGTCTCGTAGATTCGCTTTATCAGTGACTAAAACGCAGCAATCTCCAGAAATAGATAACCCGGCCAGTGTCAAAAGGCAATTGGCGCAGCTGTTTGACTTGTCTCTGAGGGCAACTGTGCCCGATGAGCCAGATGTTGTGCCGTTAATTGATGCTTGTGCTGTTAAAGGTGGCGTAAAATTTGGTGATTATCAATGTAATAATGCAATGGGTATATGGTCTAAGATGAAGGGAAAGCAGACAGGATTTAGGGGTCCCCCAGCAATTGGTCAGGCTATCGTTAACAATCTTCCTCCATCTGAAATG…
Chr01	GmHk_01G000063.1	605071	605295	+	-	hypothetical protein						NA	S	MKDAGKSHKANGKLSPETRKDRKSATGLSGSPKKGGHGGKFTWIGHGYEQVEMPHGAMDAKDPNFEDPVEIATV	ATGAAGGACGCCGGAAAGAGCCACAAGGCGAACGGAAAGCTGTCGCCGGAGACTCGGAAGGATCGGAAGTCGGCGACGGGGCTGAGCGGATCGCCGAAGAAGGGAGGCCACGGCGGGAAGTTCACGTGGATCGGCCACGGCTACGAGCAAGTTGAGATGCCGCACGGTGCTATGGACGCCAAGGACCCGAACTTCGAGGATCCTGTGGAGATCGCCACCGTGTGA
Chr01	GmHk_01G000064.1	610347	618196	+	EMB1027_0	Arginine--tRNA ligase, chloroplastic/mitochondrial	GO:0000166;GO:0004812;GO:0004814;GO:0005524;GO:0005737;GO:0006418;GO:0006420	IPR001412;IPR005148;IPR008909;IPR009080;IPR014729;IPR035684;IPR036695	PF00750;PF03485;PF05746	cd00671	TIGR00456	arginyL-tRNA synthetase	J	MAYVEVYCPASVKKQLAKEFEESLRITVPDEPDVVPSIDPCAANKAGIKFADYQCNNAMGLFAKMKGKQTGFRGPQAVGQAILNHLPQSEMIESCSVAGPGFVNIVLSKKWIAQRLERLLIDGIDKWAPRLPVKTVLVDFSSPNIAKEMHVGHLRSTIIGDTLARMFEFSRVETLIRRNHLGDWGTQFGMLIAHLFDTYPNPEDFNEAAIGDLQAFYKASKVRFDNDPEFKLRAQQSVVRLQSGEEKYHRAWQQICDISQAEFEKVYQRLGVRLEARGESYYNDLIPQTLERLDNLGLIEEDDGARVIFVEGVNIPIIAVKRDGGYNYSSTDLAALWNRLNVENVEWNIYVTDVGQWQHFDMVFKAFRRAGWLPNHENEFPKCTHIGFGLVLGEDGKRF…	ATGGCGTATGTTGAAGTATATTGTCCAGCTAGTGTTAAGAAGCAGTTGGCGAAGGAGTTTGAGGAGTCTCTCCGGATAACCGTGCCTGATGAACCCGATGTTGTGCCTTCTATTGATCCTTGCGCTGCCAACAAAGCTGGTATTAAATTCGCTGATTATCAATGTAATAATGCAATGGGTCTATTTGCTAAGATGAAAGGGAAGCAGACAGGATTCAGGGGTCCCCAGGCAGTTGGACAGGCCATACTTAACCATCTTCCGCAGTCTGAAATGATAGAATCATGCTCTGTAGCTGGTCCTGGGTTTGTGAATATTGTCTTGTCGAAGAAGTGGATAGCGCAGAGGTTAGAGAGGTTGCTGATTGATGGTATTGATAAGTGGGCACCTCGACTTCCCGTG…
Chr01	GmHk_01G000065.1	620015	647091	+	NRPC2_2	DNA-directed RNA polymerase III subunit 2	GO:0003677;GO:0003899;GO:0006351;GO:0032549	IPR007121;IPR007641;IPR007642;IPR007644;IPR007645;IPR007646;IPR007647;IPR014724;IPR015712;IPR037033;IPR037034	PF00562;PF04560;PF04561;PF04563;PF04565;PF04566;PF04567	cd00653		DNA-dependent RNA polymerase catalyzes the transcription of DNA into RNA using the four ribonucleoside triphosphates as substrates (By similarity)	K	MGLKHDPLQQPTTNQFNGGNKLPGDHCGDSGFDQRVLTAPIKSAVDKFQLIPEFLKVRGLVKQHLDSFNYFVRTDIKKIVRANNLIMASRYPHIYLRFLNVGIGKPSMMIDEVTEGLTPQTCRLSDLTYAAPICADVEYTLRSHDKPDNKRTLRVEIGRMPIMLRSCCCVLHGKDEAELAKLGECPLDPGGYFVIKGTEKVILIQEQLSKNRIIIDTDKKGNITASVTSSTEKIKTKTVIVMENEKLWLQLNKFPKKVPLMVVMKAMGMESDQEVIQMVGRDPRYSFLLLPSIEECRKCKVYTKEQALEYLDKLVKRPTYSSNSAEKEGAAFSALRDVFLANVPVDQDNFQKKCIYVAVMMRRIMDAILNKDAMDDKDYVGNKRLELSGQLISLLFEDL…	ATGGGTCTCAAGCACGATCCTTTGCAACAACCCACCACCAATCAGTTCAATGGGGGCAACAAGTTACCTGGTGACCATTGTGGTGATTCTGGTTTTGACCAAAGGGTCCTAACTGCTCCCATAAAATCTGCTGTTGACAAGTTCCAGCTTATTCCTGAGTTCCTCAAGGTTAGGGGATTGGTGAAGCAACATTTGGATTCCTTTAACTATTTTGTGAGGACAGATATAAAGAAAATCGTTCGTGCTAACAATCTTATCATGGCGAGTAGGTACCCACACATATATCTAAGGTTTTTAAATGTCGGAATTGGTAAACCATCCATGATGATTGATGAGGTTACTGAGGGCCTTACTCCACAAACGTGCCGCTTAAGTGACCTGACGTATGCGGCTCCAATA…
Chr01	GmHk_01G000065.2	620015	647376	+	NRPC2_2	DNA-directed RNA polymerase III subunit 2	GO:0003677;GO:0003899;GO:0006351;GO:0032549	IPR007121;IPR007641;IPR007642;IPR007644;IPR007645;IPR007646;IPR007647;IPR014724;IPR015712;IPR037033;IPR037034	PF00562;PF04560;PF04561;PF04563;PF04565;PF04566;PF04567	cd00653		DNA-dependent RNA polymerase catalyzes the transcription of DNA into RNA using the four ribonucleoside triphosphates as substrates (By similarity)	K	MGLKHDPLQQPTTNQFNGGNKLPGDHCGDSGFDQRVLTAPIKSAVDKFQLIPEFLKVRGLVKQHLDSFNYFVRTDIKKIVRANNLIMASRYPHIYLRFLNVGIGKPSMMIDEVTEGLTPQTCRLSDLTYAAPICADVEYTLRSHDKPDNKRTLRVEIGRMPIMLRSCCCVLHGKDEAELAKLGECPLDPGGYFVIKGTEKVILIQEQLSKNRIIIDTDKKGNITASVTSSTEKIKTKTVIVMENEKLWLQLNKFPKKVPLMVVMKAMGMESDQEVIQMVGRDPRYSFLLLPSIEECRKCKVYTKEQALEYLDKLVKRPTYSSNSAEKEGAAFSALRDVFLANVPVDQDNFQKKCIYVAVMMRRIMDAILNKDAMDDKDYVGNKRLELSGQLISLLFEDL…	ATGGGTCTCAAGCACGATCCTTTGCAACAACCCACCACCAATCAGTTCAATGGGGGCAACAAGTTACCTGGTGACCATTGTGGTGATTCTGGTTTTGACCAAAGGGTCCTAACTGCTCCCATAAAATCTGCTGTTGACAAGTTCCAGCTTATTCCTGAGTTCCTCAAGGTTAGGGGATTGGTGAAGCAACATTTGGATTCCTTTAACTATTTTGTGAGGACAGATATAAAGAAAATCGTTCGTGCTAACAATCTTATCATGGCGAGTAGGTACCCACACATATATCTAAGGTTTTTAAATGTCGGAATTGGTAAACCATCCATGATGATTGATGAGGTTACTGAGGGCCTTACTCCACAAACGTGCCGCTTAAGTGACCTGACGTATGCGGCTCCAATA…
Chr01	GmHk_01G000065.3	620015	647091	+	NRPC2_2	DNA-directed RNA polymerase III subunit 2	GO:0003677;GO:0003899;GO:0006351;GO:0032549	IPR007121;IPR007641;IPR007642;IPR007644;IPR007645;IPR007646;IPR007647;IPR014724;IPR015712;IPR037033;IPR037034	PF00562;PF04560;PF04561;PF04563;PF04565;PF04566;PF04567	cd00653		DNA-dependent RNA polymerase catalyzes the transcription of DNA into RNA using the four ribonucleoside triphosphates as substrates (By similarity)	K	MGLKHDPLQQPTTNQFNGGNKLPGDHCGDSGFDQRVLTAPIKSAVDKFQLIPEFLKVRGLVKQHLDSFNYFVRTDIKKIVRANNLIMASRYPHIYLRFLNVGIGKPSMMIDEVTEGLTPQTCRLSDLTYAAPICADVEYTLRSHDKPDNKRTLRVEIGRMPIMLRSCCCVLHGKDEAELAKLGECPLDPGGYFVIKGTEKVILIQEQLSKNRIIIDTDKKGNITASVTSSTEKIKTKTVIVMENEKLWLQLNKFPKKVPLMVVMKAMGMESDQEVIQMVGRDPRYSFLLLPSIEECRKCKVYTKEQALEYLDKLVKRPTYSSNSAEKEGAAFSALRDVFLANVPVDQDNFQKKCIYVAVMMRRIMDAILNKDAMDDKDYVGNKRLELSGQLISLLFEDL…	ATGGGTCTCAAGCACGATCCTTTGCAACAACCCACCACCAATCAGTTCAATGGGGGCAACAAGTTACCTGGTGACCATTGTGGTGATTCTGGTTTTGACCAAAGGGTCCTAACTGCTCCCATAAAATCTGCTGTTGACAAGTTCCAGCTTATTCCTGAGTTCCTCAAGGTTAGGGGATTGGTGAAGCAACATTTGGATTCCTTTAACTATTTTGTGAGGACAGATATAAAGAAAATCGTTCGTGCTAACAATCTTATCATGGCGAGTAGGTACCCACACATATATCTAAGGTTTTTAAATGTCGGAATTGGTAAACCATCCATGATGATTGATGAGGTTACTGAGGGCCTTACTCCACAAACGTGCCGCTTAAGTGACCTGACGTATGCGGCTCCAATA…
Chr01	GmHk_01G000066.1	649418	657023	+	VPS15_1	Serine/threonine-protein kinase VPS15	GO:0004672;GO:0005515;GO:0005524;GO:0006468	IPR000719;IPR001680;IPR008271;IPR011009;IPR011989;IPR015943;IPR016024;IPR017986;IPR021133;IPR036322	PF00069;PF00400;PF02985	cd13980		phosphoinositide-3-kinase, regulatory subunit 4	T	MGNKIARTTQVSASEYYLHELPSTYNLVLKEVLGRGRFFKSIQCKHDEGLVLVKVYFKRGDFLDLSDYERRLSQIKHIFTSIDHPHVWPFQFWQETDKAAYLLRQFFFHNLHDRLSTRPFLSLVEKKWLAFQLLVAVKQCHENGVCHGDIKCENVLITSSNWLYLADFASFKPTYIPYDDPSDFSFFFDTGGRRLCYLAPERFYEHGGEMQVAQDTPLKPYMDIFAVGCVVAELFLEGQPLFELSQLLAYRRGQYDPSQHLEKIPDLGIRKMILHMIQLEPESRFSAERYLKEYAAVVFPIYFSPFLHDFYRCWSPLHSDMRVLLCQSAFPEILKQMMNNKSYDDAGVNSGELLENMVAKESVSFMNDSLMKREDIGKGLVHDHYELLGDINSLLRDAK…	ATGGGGAACAAAATCGCGCGCACGACGCAAGTATCGGCTTCGGAGTACTACCTACACGAGCTGCCGTCGACGTACAATCTGGTTCTGAAGGAGGTTTTAGGTCGCGGTCGCTTCTTCAAGTCGATTCAGTGCAAACACGACGAGGGTTTGGTCCTTGTCAAGGTCTATTTCAAGCGCGGCGATTTCCTCGATCTCTCCGACTACGAGCGCCGTCTCTCTCAGATCAAACACATCTTCACTTCCATCGATCACCCTCACGTCTGGCCCTTTCAGTTTTGGCAAGAAACAGATAAAGCAGCATATCTTTTGAGACAGTTTTTCTTCCATAATCTGCATGATAGGTTAAGCACGCGCCCTTTTCTTAGTCTCGTTGAGAAGAAATGGTTGGCTTTTCAGTTG…
Chr01	GmHk_01G000066.2	649418	657023	+	VPS15_1	Serine/threonine-protein kinase VPS15	GO:0004672;GO:0005515;GO:0005524;GO:0006468	IPR000719;IPR001680;IPR008271;IPR011009;IPR011989;IPR015943;IPR016024;IPR017986;IPR021133;IPR036322	PF00069;PF00400;PF02985			phosphoinositide-3-kinase, regulatory subunit 4	T	MGNKIARTTQVSASEYYLHELPSTYNLVLKEVLGRGRFFKSIQCKHDEGLVLVKVYFKRGDFLDLSDYERRLSQIKHIFTSIDHPHVWPFQFWQETDKAAYLLRQFFFHNLHDRLSTRPFLSLVEKKWLAFQLLVAVKQCHENGVCHGDIKCENVLITSSNWLYLADFASFKPTYIPYDDPSDFSFFFDTGGRRLCYLAPEIPDLGIRKMILHMIQLEPESRFSAERYLKEYAAVVFPIYFSPFLHDFYRCWSPLHSDMRVLLCQSAFPEILKQMMNNKSYDDAGVNSGELLENMVAKESVSFMNDSLMKREDIGKGLVHDHYELLGDINSLLRDAKKNNNQSHVAENAHNSTFPENLKNLQTGKLLQTISNAFRGNDHPFLKSVTMNDLNSLMSEYDS…	ATGGGGAACAAAATCGCGCGCACGACGCAAGTATCGGCTTCGGAGTACTACCTACACGAGCTGCCGTCGACGTACAATCTGGTTCTGAAGGAGGTTTTAGGTCGCGGTCGCTTCTTCAAGTCGATTCAGTGCAAACACGACGAGGGTTTGGTCCTTGTCAAGGTCTATTTCAAGCGCGGCGATTTCCTCGATCTCTCCGACTACGAGCGCCGTCTCTCTCAGATCAAACACATCTTCACTTCCATCGATCACCCTCACGTCTGGCCCTTTCAGTTTTGGCAAGAAACAGATAAAGCAGCATATCTTTTGAGACAGTTTTTCTTCCATAATCTGCATGATAGGTTAAGCACGCGCCCTTTTCTTAGTCTCGTTGAGAAGAAATGGTTGGCTTTTCAGTTG…
Chr01	GmHk_01G000067.1	658549	663702	-	LAMP1_1	putative glutamate carboxypeptidase LAMP1		IPR003137;IPR007365;IPR007484;IPR036757	PF02225;PF04253;PF04389	cd02121;cd08022		peptidase m28	S	MKTSTTTTTTILAIATSYLFLLITPTQKSTYHSLFISDSLSDNASIYNHLKTLTRRPHVAGSKANAEAASYVVSVFTSSYIPSHIVSYEVSLTYPLSRSLVLITNPSTTFTLHQETYEGDPYADVADEVVPTFHAYAKSGTVAAPVCYVNYGRVEDYLTLKDKNGVNVSGTVVLARHGKIYRGDIVKNAYEEGAVGVVIYSDRKDYGGEEKWFPDEKWLPPSGVQVGTVYGGLGDPTTPGWASSSSGDGECERLNKDEVEKGGDVPLIPSLPVSAADGEKIMRSIGGPVAEDDWQGSKDAPIYRLGPGPGILNLSYKGQDVIATIQNVIGVIEGAEEPDRFVILGNHRDAWTFGAVDPNSGTAALLEVAQRLGKLQKKGWRPRRTILLCNWDAEEYGLI…	ATGAAAACAAGCACTACTACAACTACAACCATATTAGCCATAGCCACCTCTTACTTGTTTCTTCTGATCACGCCAACCCAAAAATCCACGTACCACTCTCTCTTCATATCCGATTCCCTATCAGACAATGCCTCCATATACAACCACCTTAAAACTCTCACCCGCAGACCCCATGTCGCAGGTTCCAAAGCCAACGCTGAAGCTGCCTCATACGTTGTCTCAGTCTTCACCTCCTCATACATACCATCACACATAGTTTCCTACGAGGTTTCTCTCACGTACCCTTTGTCACGTTCGTTGGTTCTAATAACGAACCCTTCTACAACCTTCACTCTCCACCAAGAAACCTACGAGGGTGATCCTTATGCTGACGTGGCAGATGAGGTTGTCCCCACTTTC…
Chr01	GmHk_01G000067.2	658549	659780	-	LAMP1_1	putative glutamate carboxypeptidase LAMP1		IPR007365;IPR036757	PF04253			peptidase m28	S	MKDTLQHQIFKSQLSVENLEDEISNKDINLSPIFKSIKGLEKAAIKIDSQRKEIEAGKGWITGKKDHLRVRELNDRLMMAERAFTDRDGLFGMSWYKHLIYGPSKHNDYGSQSFPGIDDAVKMAKNLHTAESWHRVQHEVWRVSRVIKQASLVLFGLLS	ATGAAAGATACTTTACAACACCAAATATTTAAATCACAGCTTAGCGTGGAGAATCTGGAGGATGAGATTTCAAATAAAGACATAAATTTGTCACCTATATTCAAGTCCATCAAGGGGCTTGAGAAAGCAGCAATCAAGATAGATAGCCAGAGAAAGGAAATAGAAGCTGGTAAAGGTTGGATAACAGGGAAGAAGGACCACTTGAGAGTGAGAGAGCTGAATGATAGATTGATGATGGCTGAGCGTGCATTCACTGACAGAGATGGCCTCTTTGGAATGTCATGGTATAAGCATTTGATTTATGGACCATCAAAACATAATGACTACGGCTCTCAATCTTTCCCTGGAATCGATGATGCTGTTAAAATGGCCAAAAATCTACATACTGCAGAATCGTGG…
Chr01	GmHk_01G000068.1	676701	679588	+	-	hypothetical protein						NA	S	MMEVTKDEAATPGSGGAQPPNPISNGNPNPNPNPNPNTPHTPRGSKGKSCKGCTYYTSLHKAKSKNPTCVGFSRALQQVPPFVVGETELEASKEGRSLANFKYACIGYSVYLDNKDSSAGSQDKTAKLPFCVGLEVVLVEKASNSDAGHVPATHKTDDEHAAPQPRRYIPPNHATEFQRNAGLVASGVAKNLNKVGNYVKDLLNDILN	ATGATGGAGGTCACCAAAGACGAAGCTGCAACGCCAGGATCAGGAGGTGCTCAACCTCCCAATCCAATTTCTAACGGTAACCCTAATCCAAATCCAAACCCTAACCCGAACACGCCTCACACCCCCAGAGGATCCAAAGGAAAATCGTGTAAGGGATGCACCTACTACACATCGCTTCATAAGGCCAAGTCCAAAAACCCCACATGCGTTGGTTTCTCCAGAGCACTCCAGCAAGTACCCCCTTTTGTTGTTGGAGAAACTGAGTTGGAAGCTTCAAAAGAGGGCCGCAGCCTTGCAAATTTCAAGTATGCATGTATTGGATACTCTGTCTACTTAGACAACAAAGATTCTTCTGCTGGCTCTCAGGATAAAACAGCAAAATTGCCCTTTTGTGTTGGT…
Chr01	GmHk_01G000069.1	687465	688990	-	IQD31_0	Protein IQ-DOMAIN 31	GO:0005515	IPR025064	PF00612;PF13178			IQ calmodulin-binding motif family protein, expressed	S	MGRATRWVKSLFGIRREKEKKLNFRCGEAKSMELCCSESTSNSTVLCHNSGTIPPNLSQAEAAWLQSFCTEKEQNKHAIAVAAATAAAADAAVAAAQAAVAVVRLTSQGRGRTMFGVGPEMWAAIKIQTVFRGFLARKALRALKGLVKLQALVRGYLVRKLATATLHSMQALVRAQARMRSHKSLRPMTTKNEAYKPHNRARRSMERFDDTKSECAVPIHSRRVSSSFDATINNSVDGSPKIVEVDTFRPKSRSRRAISDFGDEPSLEALSSPLPVPYRTPTRLSIPDQRNIQDSEWGLTGEECRFSTAHSTPRFTNSCTCGSVAPLTPKSVCTDNYLFLRQYGNFPNYMTSTQSFKAKLRSHSAPKQRPEPGPRKRISLNEMMESRNSLSGVRMQRSC…	ATGGGGAGAGCCACTAGGTGGGTGAAGAGTTTGTTTGGAATAAGAAGAGAGAAAGAGAAGAAACTAAACTTCAGGTGTGGAGAGGCTAAAAGTATGGAATTGTGTTGTTCTGAGAGTACTAGTAATTCAACAGTTTTGTGTCACAATTCAGGGACTATACCCCCCAACCTTTCTCAAGCTGAGGCTGCTTGGTTACAATCATTCTGCACAGAGAAGGAGCAAAACAAGCACGCCATCGCAGTTGCTGCTGCCACGGCGGCAGCTGCTGATGCTGCCGTGGCAGCAGCACAGGCTGCGGTGGCGGTTGTTAGGCTCACCAGCCAAGGAAGGGGTCGCACCATGTTTGGTGTTGGACCTGAGATGTGGGCTGCCATCAAGATTCAAACAGTGTTTAGAGGA…
Chr01	GmHk_01G000070.1	713004	714503	-	DTX51_0	Protein DETOXIFICATION 51	GO:0006855;GO:0015238;GO:0015297;GO:0016020;GO:0055085		PF01554	cd13132	TIGR00797	Mate efflux family protein	V	MCESKSEQMHDTEKQTELGGLLTRRGSTRTIMWDVIGEAKSLWEVAFPTALTGLIFYARSMVSMLFLGHLGDTELAAGSLAIAFANITGYSVLSGLSLGMEPLCSQAFGAKRPKLLSLTLHRCVIFLLFSSIPISLLWLNMSKIFILLNQHTHITKMAQTYLLFLLPDLLINSFLHPIRVYLRAQNVTHPVTLASLAGTLLHVAFNLALVERGLGGVAAAAAASSFSILCLLVLYLWISGVHLATWTAPSRECLTCWEPLIRLAAPSCVSVCLEWWWYEIMILLCGLLVDPTASVAAMGILIQTTSLIYVFPSSLGLAVSTSVGNELGANRGRRARMSAVVAVFFAAVMGFSAVVFATAMRRRWGRMFTGDEGILRLTGAALPILGLCELGNCPQTVGC…	ATGTGCGAATCAAAATCAGAGCAGATGCATGATACGGAAAAGCAGACAGAATTAGGTGGGTTATTAACAAGACGAGGTTCGACTAGGACAATAATGTGGGATGTGATAGGAGAAGCGAAATCCCTGTGGGAGGTGGCATTCCCGACAGCACTCACTGGTCTAATTTTCTACGCGCGTTCCATGGTCTCCATGCTGTTCCTAGGCCACCTAGGAGACACCGAACTCGCTGCGGGATCCCTAGCCATCGCCTTCGCCAACATCACTGGCTACTCAGTTCTCTCGGGTCTCTCCTTAGGTATGGAACCTCTTTGTTCCCAAGCCTTCGGAGCTAAACGCCCCAAACTCCTCTCTCTCACCCTCCATCGCTGCGTCATCTTTTTATTATTCTCTTCAATCCCC…
Chr01	GmHk_01G000071.1	740293	746442	+	HXK2_1	Hexokinase-1	GO:0001678;GO:0004396;GO:0005524;GO:0005536;GO:0005975;GO:0016773	IPR022672;IPR022673	PF00349;PF03727	cd00012		hexokinase	G	MWFNVKVAVVCTAAACAAVAVALVVRHRMRSSGKWGRAVAIVKEFEEQCGTPIGKLRQVADAMNVEMHEGLASEGGSKLKMLITYVDNLPSGDEKGVFYALDLGGTNFRTLRVHLGGKEKGVVNLESEKVSIPPHLMTGSSHELFDFVAAKLAKFVSSEPEEFHLPPGRQRELGFTFSFPVRQTSIASGNLIKWTKSFNIEDMVGEDVVGELTKSFDKIGLDMRVAALVNDTVGTVARARFSNQDVVAGVIVGTGTNAAYVESAHAIPKWHGLRPKSRETVINMEWGDFHSSHLPLTEYDQALDAESLNPGEQIFEKIISGMYLGDIVRRVLLKMAEEADFFGDTVPPKLRIPFILRTYHIVVMHHDTSSDLKVVGNKLKDILEINSTSLKMRKIVVQL…	ATGTGGTTTAATGTCAAGGTGGCGGTGGTTTGCACGGCTGCGGCGTGTGCTGCGGTGGCGGTGGCGCTGGTGGTGCGCCACCGCATGAGGAGCTCCGGAAAGTGGGGTCGCGCGGTGGCTATTGTGAAAGAGTTTGAGGAGCAGTGTGGGACCCCAATTGGGAAGCTGAGACAGGTTGCTGATGCCATGAACGTTGAGATGCATGAAGGTCTTGCTTCTGAAGGTGGCAGCAAGCTCAAGATGTTGATCACTTATGTTGATAATCTCCCTTCTGGGGATGAGAAAGGAGTATTTTATGCGTTAGACCTTGGTGGCACAAACTTTCGAACCCTTCGCGTGCATTTAGGTGGGAAGGAGAAAGGTGTTGTCAATCTAGAGTCTGAAAAAGTTTCCATTCCT…
Chr01	GmHk_01G000071.2	735672	740290	+	HXK2_1	Hexokinase-2	GO:0001678;GO:0004396;GO:0005524;GO:0005536;GO:0005975;GO:0016773	IPR022672;IPR022673	PF00349;PF03727	cd00012		hexokinase	G	MGKVAVGAAVVCAAAACAAVALVVRHRMRSSGKWGRVVAIVKEFEEQCRTPIGKLRQVADAMDVEMHAGLASEGGSKLKMLITYVDNLPSGDEKGLFYALDLGGTNFRTLRVHLGGKEKGVVKIESDEVSIPPHLMTGSSQELFDFIASKLAKFVSSEPEELHPPPGRQRELGFTFSFPVRQTSIASGNIIKWTKGFNIEDAVGEDVVGELTKSLEKIGLDMHVAALVNDTVGTVARARFSNQDVIAGVILGTGTNAAYVECAHAIPKWHGLLPKSGEMVINMEWGNFRSSHLPLTEYDHALDAESLNPGEQIFEKIISGMYLGEIVRRVLLKLAEEVDFFGDTVPPKLRIPFVLRTPDMSAIHQDTSSDLKVVGNKLKDILEINNTSLKMRKIVVELC…	ATGGGGAAGGTGGCGGTCGGAGCTGCGGTCGTTTGCGCGGCGGCGGCGTGTGCTGCGGTGGCGCTGGTGGTGCGCCACCGCATGAGGAGCTCCGGAAAGTGGGGTCGCGTGGTGGCTATTGTGAAAGAGTTTGAGGAGCAGTGTAGGACCCCAATTGGGAAGCTGAGACAGGTTGCTGACGCCATGGACGTTGAGATGCACGCGGGTCTTGCTTCTGAAGGTGGCAGCAAGCTCAAGATGTTGATCACTTATGTTGATAATCTCCCTTCTGGGGATGAGAAAGGACTCTTTTATGCATTAGACCTTGGTGGCACAAACTTCCGAACCCTTCGCGTGCATTTAGGTGGGAAGGAGAAAGGTGTTGTCAAAATAGAGTCTGATGAAGTTTCCATTCCTCCT…
Chr01	GmHk_01G000071.3	735672	740290	+	HXK2_1	Hexokinase-2	GO:0001678;GO:0004396;GO:0005524;GO:0005536;GO:0005975;GO:0016773	IPR022672;IPR022673	PF00349;PF03727	cd00012		hexokinase	G	MGKVAVGAAVVCAAAACAAVALVVRHRMRSSGKWGRVVAIVKEFEEQCRTPIGKLRQVADAMDVEMHAGLASEGGSKLKMLITYVDNLPSGDEKGLFYALDLGGTNFRTLRVHLGGKEKGVVKIESDEVSIPPHLMTGSSQELFDFIASKLAKFVSSEPEELHPPPGRQRELGFTFSFPVRQTSIASGNIIKWTKGFNIEDAVGEDVVGELTKSLEKIGLDMHVAALVNDTVGTVARARFSNQDVIAGVILGTGTNAAYVECAHAIPKWHGLLPKSGEMVINMEWGNFRSSHLPLTEYDHALDAESLNPGEQIFEKIISGMYLGEIVRRVLLKLAEEVDFFGDTVPPKLRIPFVLRTPDMSAIHQDTSSDLKVVGNKLKDILEINNTSLKMRKIVVELC…	ATGGGGAAGGTGGCGGTCGGAGCTGCGGTCGTTTGCGCGGCGGCGGCGTGTGCTGCGGTGGCGCTGGTGGTGCGCCACCGCATGAGGAGCTCCGGAAAGTGGGGTCGCGTGGTGGCTATTGTGAAAGAGTTTGAGGAGCAGTGTAGGACCCCAATTGGGAAGCTGAGACAGGTTGCTGACGCCATGGACGTTGAGATGCACGCGGGTCTTGCTTCTGAAGGTGGCAGCAAGCTCAAGATGTTGATCACTTATGTTGATAATCTCCCTTCTGGGGATGAGAAAGGACTCTTTTATGCATTAGACCTTGGTGGCACAAACTTCCGAACCCTTCGCGTGCATTTAGGTGGGAAGGAGAAAGGTGTTGTCAAAATAGAGTCTGATGAAGTTTCCATTCCTCCT…
Chr01	GmHk_01G000072.1	747774	750916	-	HSL1_0	Receptor-like protein kinase HSL1	GO:0004672;GO:0005515;GO:0005524;GO:0006468	IPR001611;IPR003591;IPR008271;IPR011009;IPR013210;IPR017441;IPR032675	PF00069;PF08263;PF13855			leucine Rich Repeat	S	MKKTTSSCDKMPILSLLSFFLFLTYANSQSQYSLLYDQEHAVLLRIKQHLQNPPFLNHWTPSNSSHCTWPEISCTNGSVTSLTMINTNITQTLPPFLCDLTNLTHVDFQWNFIPGEFPKYLYNCSKLEYLDLSQNYFVGKIPDDIDHLASLSFLSLGGNNFSGDIPASIGRLKELRSLQLYQCLLNGTFPAEIGNLSNLESLYVFSNHMLPPTKLPSSLTQLNKLKVFHMYESSLVGEIPEAIGHMVALEELDLSKNDLSGQIPNDLFMLKNLSILYLYRNSLSGEIPGVVEAFHLTDLDLSENKLSGKIPDDLGRLNNLKYLNLYSNQLSGKVPESIARLRALTDFVVFINNLSGTLPLDFGLFSKLETFQVASNSFTGRLPENLCYHGSLVGLTAYD…	ATGAAAAAAACTACCTCATCATGTGACAAAATGCCAATCCTCTCTCTTCTCTCCTTCTTCCTCTTTCTCACCTATGCAAACTCTCAGTCTCAGTACTCTTTGCTGTATGATCAAGAACATGCAGTCCTATTGAGGATAAAGCAACACCTGCAAAATCCACCGTTCCTCAATCACTGGACCCCATCAAACTCTTCACATTGCACTTGGCCAGAGATCAGCTGCACCAATGGCTCAGTCACTTCACTGACTATGATCAACACCAACATCACTCAAACACTGCCACCTTTCCTATGTGACCTCACAAACCTCACACATGTTGATTTTCAGTGGAATTTCATTCCTGGTGAATTCCCAAAATATCTCTACAACTGCTCCAAGCTTGAGTACCTTGACCTCTCA…
Chr01	GmHk_01G000073.1	752731	756075	-	HSL1_1	Receptor-like protein kinase HSL1	GO:0004672;GO:0005515;GO:0005524;GO:0006468	IPR001611;IPR003591;IPR008271;IPR011009;IPR013210;IPR017441;IPR032675	PF00069;PF00560;PF08263;PF13855	cd14066		Serine Threonine protein kinase	T	MELFTSSCLKFLFHSLVILFVLFNHANSQSQLHDQERATLLKIKEYLENPEFLSHWTPSSSSHCSWPEIKCTSDGSVTGLTLSNSSITQTIPSFICDLKNLTVVDFYNNYIPGEFPTTLYNCSKLEYLDLSQNNFVGSIPHDIDRLSNLQYLSLGYTNFSGDIPASIGRLKELRNLQFQNSLLNGTFPAEIGNLSNLDTLDLSSNNMLPPSRLHDDWTRLNKLKFFFMFQSNLVGEIPETIVNMVALERLDLSQNNLSGPIPGGLFMLENLSIMFLSRNNLSGEIPDVVEALNLTIIDLTRNFISGKIPDGFGKLQKLTGLALSINNLEGEIPASIGLLPSLVDFKVFFNNLSGILPPDFGRYSKLETFLVANNSFSGKLPENLCYNGHLLNISVYENY…	ATGGAACTATTCACCTCATCATGTCTTAAATTTCTATTTCACTCTCTTGTGATCTTATTCGTCCTCTTTAACCATGCAAACTCTCAGTCTCAGTTGCATGATCAAGAACGTGCAACTTTACTGAAGATAAAGGAATACCTTGAAAACCCTGAATTCCTTAGTCACTGGACTCCATCAAGCTCCTCTCACTGCTCATGGCCAGAGATAAAATGCACCTCCGATGGCTCAGTCACTGGATTGACTTTGTCCAACAGCAGCATCACTCAAACCATACCCTCTTTCATATGTGACCTCAAAAACCTCACAGTTGTTGATTTCTACAACAATTACATTCCCGGGGAGTTCCCAACAACTCTCTACAATTGCTCCAAGTTGGAGTACCTAGACCTGTCCCAGAAC…
Chr01	GmHk_01G000074.1	766226	766828	-	TIM17-2_0	Mitochondrial import inner membrane translocase subunit TIM17-2			PF02466			mitochondrial import inner membrane translocase, subunit	O	MGTPETSREPCPDRILDDIGGAFGMGAVGGSAFHFLKGLYNSPKGDRFVGATQAVRLNAPRVGGSFAVWGGLFSAFDCTMVYARQKEDPWNSIVAGAATGGFLSMRQGLGASARSAAFGGVLLALIEGAGIMLNKFLSAQQPMPMIMDELPPQSSTEQSWLGGWFGGGNKEETATTAGSGSETKILESFDAPPVPNFEYK	ATGGGAACACCCGAGACATCGCGCGAACCCTGCCCCGATCGCATCCTCGACGACATAGGCGGCGCCTTCGGCATGGGAGCGGTGGGTGGCTCCGCCTTCCATTTTCTCAAGGGTCTCTACAATTCCCCCAAGGGCGATCGCTTCGTCGGCGCCACCCAGGCCGTGCGCCTCAACGCCCCCCGCGTCGGCGGCAGCTTCGCCGTCTGGGGCGGCCTCTTCTCCGCCTTCGACTGCACCATGGTCTACGCGCGCCAGAAGGAGGACCCCTGGAACTCCATCGTCGCCGGCGCCGCCACCGGCGGCTTCCTCTCCATGCGCCAGGGCCTCGGCGCCTCCGCCCGCTCCGCGGCCTTCGGCGGCGTCCTCCTCGCTCTCATCGAGGGCGCCGGGATCATGCTC…
Chr01	GmHk_01G000075.1	768889	777197	+	CMT3_0	DNA (cytosine-5)-methyltransferase CMT3	GO:0003682;GO:0008168	IPR001025;IPR001525;IPR016197;IPR018117;IPR023780;IPR029063	PF00145;PF00385;PF01426	cd00024;cd04716	TIGR00675	Cytosine-specific methyltransferase	L	MPSKRKTRSSASPAAAPPSKRASRSSASRVADSAPVKSEAEEVVAASSVVKEEAQASFTDVTDGNVSDGEGTNARFVGEPVPDEEARRRWPKRYQEKEKKQSAGPKSNRNDEDEEIQQARRHYTQAEVDGCMLYKLYDDAHVKAEEGEDNYICKIVEIFEAIDGALYFTAQWYYRAKDTVIKKLAYLIEPKRVFFSEVQDDNPLDCLVEKLNIARITLNVDLEAKKETIPPCDYYCDTQYLLPYSTFVNLPSENGESGSETSSTISSETNGIGKYEVNSQPKEAFLPEESKDPEMKLLDLYCGCGAMSTGLCLGGNLSGVNLVTRWAVDLNQHACECLKLNHPETEVRNESAENFLSLLKEWQELCSYFSLVEKKVSHEKYVNLFSEDDDDTSSNEEVN…	ATGCCTAGCAAGCGCAAGACCAGATCCTCCGCCTCTCCCGCTGCCGCGCCGCCGAGCAAGCGCGCCTCCAGATCCTCCGCCTCTCGCGTCGCCGATTCCGCACCGGTCAAATCTGAAGCCGAGGAAGTTGTGGCAGCTTCCTCTGTCGTCAAAGAAGAGGCGCAAGCAAGCTTCACGGACGTTACTGACGGCAACGTTAGCGATGGCGAGGGGACTAACGCCAGATTCGTCGGAGAGCCTGTTCCCGACGAGGAAGCCCGGCGCCGCTGGCCGAAACGGTACCAGGAAAAGGAAAAGAAGCAATCCGCTGGGCCAAAATCAAACAGAAACGATGAAGACGAGGAGATTCAACAAGCTCGACGTCACTACACTCAGGCAGAAGTAGATGGGTGCATGCTT…
Chr01	GmHk_01G000076.1	779929	783723	+	-	hypothetical protein	GO:0016757	IPR029044	PF13506			Glycosyl transferase, family 2	M	MASLDSLDFSLFRLSTDFCSPFAIFVQAQGCIINLILAFGWACAAFVRNREINRIKKSMRNGNNFAFLCHDISELEHSNQTDLPSVTVIMPLKGFGEHNLHNWKTQLTSLYGGPQEYLLVVESTEDPAYHAVAKLITELEDSVKARIIIAGLSTTCSQKIHNQLVGVEAMHKDSKYVLFLDDDVRLHPGSIGALVREMEKNPKIFIQTGYPLDLPSGSLGSYCIYEYHMPCSMGFATGGQTFFLWGGCMMAIFLQMHSEDFRQDNCGVVSGLRDGGYSDDMTLAAIAGAHKKLISSPAVAVFPHPLASDLNFGRYWNYLRKQTFVLESYVTKVNQVMNRALFAVHCYFSWGFVAPYCMAVIHVAAALRFRAREYSLEEMDYSSGGENTTFPL	ATGGCTTCCTTAGACTCTCTCGATTTCTCCCTCTTCCGTCTCAGCACTGACTTCTGCTCTCCTTTTGCCATTTTCGTTCAGGCGCAGGGATGTATAATAAACCTAATCCTTGCTTTTGGGTGGGCTTGTGCTGCATTTGTCAGGAACCGAGAAATAAATAGAATAAAGAAGAGTATGCGGAATGGCAATAACTTTGCATTCCTTTGTCATGATATTAGTGAACTTGAGCACTCCAATCAGACTGATCTTCCAAGTGTAACAGTAATTATGCCCCTAAAAGGATTTGGAGAACACAATCTCCATAACTGGAAGACTCAGTTAACATCGCTTTATGGTGGCCCTCAAGAATATCTTTTAGTAGTTGAAAGTACAGAGGATCCTGCATACCATGCTGTAGCT…
Chr01	GmHk_01G000076.2	779929	785212	+	-	hypothetical protein	GO:0016757	IPR029044	PF13506			Glycosyl transferase, family 2	M	MASLDSLDFSLFRLSTDFCSPFAIFVQAQGCIINLILAFGWACAAFVRNREINRIKKSMRNGNNFAFLCHDISELEHSNQTDLPSVTVIMPLKGFGEHNLHNWKTQLTSLYGGPQEYLLVVESTEDPAYHAVAKLITELEDSVKARIIIAGLSTTCSQKIHNQLVGVEAMHKDSKYVLFLDDDVRLHPGSIGALVREMEKNPKIFIQTGYPLDLPSGSLGSYCIYEYHMPCSMGFATGGQTFFLWGGCMMAIFLQMHSEDFRQDNCGVVSGLRDGGYSDDMTLAAIAGAHKKLISSPAVAVFPHPLASDLNFGRYWNYLRKQTFVLESYVTKVNQVMNRALFAVHCYFSWGFVAPYCMAVIHVAAALRFRAREYSLEEMDYSSGGLTMVWILATCTLIS…	ATGGCTTCCTTAGACTCTCTCGATTTCTCCCTCTTCCGTCTCAGCACTGACTTCTGCTCTCCTTTTGCCATTTTCGTTCAGGCGCAGGGATGTATAATAAACCTAATCCTTGCTTTTGGGTGGGCTTGTGCTGCATTTGTCAGGAACCGAGAAATAAATAGAATAAAGAAGAGTATGCGGAATGGCAATAACTTTGCATTCCTTTGTCATGATATTAGTGAACTTGAGCACTCCAATCAGACTGATCTTCCAAGTGTAACAGTAATTATGCCCCTAAAAGGATTTGGAGAACACAATCTCCATAACTGGAAGACTCAGTTAACATCGCTTTATGGTGGCCCTCAAGAATATCTTTTAGTAGTTGAAAGTACAGAGGATCCTGCATACCATGCTGTAGCT…
Chr01	GmHk_01G000076.3	779929	783723	+	-	hypothetical protein	GO:0016757	IPR029044	PF13506			Glycosyl transferase, family 2	M	MASLDSLDFSLFRLSTDFCSPFAIFVQAQGCIINLILAFGWACAAFVRNREINRIKKSMRNGNNFAFLCHDISELEHSNQTDLPSVTVIMPLKGFGEHNLHNWKTQLTSLYGGPQEYLLVVESTEDPAYHAVAKLITELEDSVKARIIIAGLSTTCSQKIHNQLVGVEAMHKDSKYVLFLDDDVRLHPGSIGALVREMEKNPKIFIQTGYPLDLPSGSLGSYCIYEYHMPCSMGFATGGQTFFLWGGCMMAIFLQMHSEDFRQDNCGVVSGLRDGGYSDDMTLAAIAGAHKKLISSPAVAVFPHPLASDLNFGRYWNYLRKQTFVLESYVTKVNQVMNRALFAVHCYFSWGFVAPYCMAVIHVAAALRFRAREYSLEEMDYSSGGENTTFPL	ATGGCTTCCTTAGACTCTCTCGATTTCTCCCTCTTCCGTCTCAGCACTGACTTCTGCTCTCCTTTTGCCATTTTCGTTCAGGCGCAGGGATGTATAATAAACCTAATCCTTGCTTTTGGGTGGGCTTGTGCTGCATTTGTCAGGAACCGAGAAATAAATAGAATAAAGAAGAGTATGCGGAATGGCAATAACTTTGCATTCCTTTGTCATGATATTAGTGAACTTGAGCACTCCAATCAGACTGATCTTCCAAGTGTAACAGTAATTATGCCCCTAAAAGGATTTGGAGAACACAATCTCCATAACTGGAAGACTCAGTTAACATCGCTTTATGGTGGCCCTCAAGAATATCTTTTAGTAGTTGAAAGTACAGAGGATCCTGCATACCATGCTGTAGCT…
Chr01	GmHk_01G000076.4	779929	785212	+	-	hypothetical protein	GO:0016757	IPR029044	PF13506			Glycosyl transferase, family 2	M	MASLDSLDFSLFRLSTDFCSPFAIFVQAQGCIINLILAFGWACAAFVRNREINRIKKSMRNGNNFAFLCHDISELEHSNQTDLPSVTVIMPLKGFGEHNLHNWKTQLTSLYGGPQEYLLVVESTEDPAYHAVAKLITELEDSVKARIIIAGLSTTCSQKIHNQLVGVEAMHKDSKYVLFLDDDVRLHPGSIGALVREMEKNPKIFIQTGYPLDLPSGSLGSYCIYEYHMPCSMGFATGGQTFFLWGGCMMAIFLQMHSEDFRQDNCGVVSGLRDGGYSDDMTLAAIAGAHKKLISSPAVAVFPHPLASDLNFGRYWNYLRKQTFVLESYVTKVNQVMNRALFAVHCYFSWGFVAPYCMAVIHVAAALRFRAREYSLEEMDYSSGGLTMVWILATCTLIS…	ATGGCTTCCTTAGACTCTCTCGATTTCTCCCTCTTCCGTCTCAGCACTGACTTCTGCTCTCCTTTTGCCATTTTCGTTCAGGCGCAGGGATGTATAATAAACCTAATCCTTGCTTTTGGGTGGGCTTGTGCTGCATTTGTCAGGAACCGAGAAATAAATAGAATAAAGAAGAGTATGCGGAATGGCAATAACTTTGCATTCCTTTGTCATGATATTAGTGAACTTGAGCACTCCAATCAGACTGATCTTCCAAGTGTAACAGTAATTATGCCCCTAAAAGGATTTGGAGAACACAATCTCCATAACTGGAAGACTCAGTTAACATCGCTTTATGGTGGCCCTCAAGAATATCTTTTAGTAGTTGAAAGTACAGAGGATCCTGCATACCATGCTGTAGCT…
Chr01	GmHk_01G000076.5	783983	785212	+	-	hypothetical protein						Glycosyl transferase, family 2	M	MGYVSLTMVWILATCTLISLFSMWNLTRIEVLLCNILSPEAPRLSLASYNWFKVFVAMLVGNFLYPISAIRSHFTQSINWSGIIYHLKDGKINKIHRIPRRQDVAPVFTDLGGKHLYGKKGMPTKGSFLSSLSKRLFQWRQPKKSE	ATGGGCTATGTTAGTTTAACAATGGTGTGGATCCTAGCCACATGCACTCTTATTTCACTTTTCTCAATGTGGAACTTGACAAGGATAGAAGTTCTACTTTGCAACATATTGTCCCCAGAGGCACCTCGACTTTCTCTGGCTTCTTATAATTGGTTTAAAGTATTCGTTGCAATGCTGGTGGGCAACTTTTTATACCCTATATCTGCAATTCGTTCTCATTTTACTCAGTCTATCAATTGGTCTGGCATTATATACCATTTGAAAGATGGAAAAATCAACAAGATACATAGAATACCAAGAAGGCAGGATGTGGCTCCAGTTTTCACTGACTTGGGAGGAAAACATTTGTATGGAAAGAAAGGGATGCCTACCAAGGGCTCATTCCTTAGTTCTTTGTCC…
Chr01	GmHk_01G000076.6	783983	785212	+	-	hypothetical protein						Glycosyl transferase, family 2	M	MGYVSLTMVWILATCTLISLFSMWNLTRIEVLLCNILSPEAPRLSLASYNWFKVFVAMLVGNFLYPISAIRSHFTQSINWSGIIYHLKDGKINKIHRIPRRQDVAPVFTDLGGKHLYGKKGMPTKGSFLSSLSKRLFQWRQPKKSE	ATGGGCTATGTTAGTTTAACAATGGTGTGGATCCTAGCCACATGCACTCTTATTTCACTTTTCTCAATGTGGAACTTGACAAGGATAGAAGTTCTACTTTGCAACATATTGTCCCCAGAGGCACCTCGACTTTCTCTGGCTTCTTATAATTGGTTTAAAGTATTCGTTGCAATGCTGGTGGGCAACTTTTTATACCCTATATCTGCAATTCGTTCTCATTTTACTCAGTCTATCAATTGGTCTGGCATTATATACCATTTGAAAGATGGAAAAATCAACAAGATACATAGAATACCAAGAAGGCAGGATGTGGCTCCAGTTTTCACTGACTTGGGAGGAAAACATTTGTATGGAAAGAAAGGGATGCCTACCAAGGGCTCATTCCTTAGTTCTTTGTCC…
Chr01	GmHk_01G000077.1	787166	789635	-	CB5LP_1	Cytochrome B5-like protein	GO:0020037	IPR018506;IPR036400	PF00173			cytochrome b5	CI	MATEERKPMEDDKELLEKKLGRNHGQQTHTMNNTYISFAEEKEETNECAKNSKKSVLQILNLNSAQYVCINAYPFLVFAVSDWIKRQSFRICIMVLLVGLTLLLGLFLAVLLFNPRHRKSGHKAKAQASLNVDKASKSYSKTEVSLHNKRTDCWIIIKNKVYDVTSYVEEHPGGDSILAHAGDDSTEGFFGYAFIPICPLMIAYLY	ATGGCGACAGAGGAGAGGAAACCCATGGAGGACGACAAGGAACTATTGGAGAAAAAACTAGGGAGGAACCACGGGCAGCAAACACACACCATGAATAATACCTATATCAGCTTCGCGGAGGAGAAGGAGGAGACCAACGAATGTGCCAAAAATTCCAAGAAAAGTGTCTTACAAATTCTTAATCTGAACAGTGCTCAATATGTTTGCATTAACGCATACCCTTTTCTTGTATTCGCCGTTTCAGATTGGATTAAGCGCCAAAGTTTCCGAATTTGCATAATGGTATTGCTAGTTGGGCTTACATTGCTTTTGGGTCTCTTCCTCGCTGTTCTTCTATTCAACCCACGACACCGCAAATCTGGGCATAAGGCAAAAGCTCAAGCCAGTTTAAACGTTGAT…
Chr01	GmHk_01G000077.2	785887	789033	-	CB5LP_1	Cytochrome B5-like protein	GO:0020037	IPR018506;IPR036400	PF00173			cytochrome b5	CI	MNRNSAQYVCINAYPFLVFAVSDWIKRQSFRICIMVLLVGLTLLLGLFLAVLLFNPRHRKSGHKAKAQASLNVDKASKSYSKTEVSLHNKRTDCWIIIKNKVYDVTSYVEEHPGGDSILAHAGDDSTEGFFGPQHATRVFDMIEDFYIGDLEQ	ATGAACAGGAACAGTGCTCAATATGTTTGCATTAACGCATACCCTTTTCTTGTATTCGCCGTTTCAGATTGGATTAAGCGCCAAAGTTTCCGAATTTGCATAATGGTATTGCTAGTTGGGCTTACATTGCTTTTGGGTCTCTTCCTCGCTGTTCTTCTATTCAACCCACGACACCGCAAATCTGGGCATAAGGCAAAAGCTCAAGCCAGTTTAAACGTTGATAAGGCATCAAAATCCTACAGTAAAACAGAAGTTTCGTTGCATAACAAGAGAACAGACTGTTGGATAATCATCAAGAACAAGGTATATGATGTTACCTCATATGTGGAAGAACATCCAGGTGGTGATTCCATTCTTGCACATGCAGGAGATGATTCAACTGAAGGGTTTTTTGGACCA…
Chr01	GmHk_01G000078.1	792753	796446	+	P85_0	Senescence/dehydration-associated protein At4g35985, chloroplastic		IPR009686	PF06911			Senescence-associated protein	S	MGCNSSKAEPPLENSIHHHHHHHHAEFQKPKTLKQEVVLQIPGCKVHLMDEGEAIELAQGHFTIMKIMDKNVPLATTIKVGNSVQWPLTKDEPVVKVDALHYLFSLPVKDGGEPLSYGVTFPEQCYGNMGMLDSFLKDQSCFSGLERNKKSDLNWEDFAPRVEYYNHFLARAIAGGTGQIVKGIFMCSNAYTNQVQKGGETILNTAAEKNNGSVVTESMNQRSDATKNNATNENLKRVRKLTNMTEKLTKSLLDGVGIMSGSMMTPVLKSQPGQAFLKMLPGEVLLASLDAVNRVFEAAEAAEKQTFSATSQAATRMVSNRFGEEAGEATEHVFATAGHSVNTAWNVSKIRKAINPASSANAAGALRNSAKNRNVIY	ATGGGTTGCAATAGCTCCAAGGCTGAACCACCGTTGGAAAACTCCATCCATCATCATCATCATCATCATCATGCAGAGTTCCAAAAACCCAAAACTCTCAAACAAGAAGTAGTGCTGCAGATTCCAGGATGCAAAGTTCATCTGATGGACGAAGGCGAAGCCATAGAACTGGCACAAGGTCACTTCACAATCATGAAGATCATGGACAAGAACGTGCCACTAGCAACCACCATAAAAGTTGGAAACAGTGTTCAGTGGCCTCTAACGAAAGATGAGCCAGTGGTGAAGGTGGATGCTCTTCACTACCTGTTCTCTCTGCCTGTAAAAGATGGTGGTGAGCCTCTAAGCTATGGTGTCACCTTTCCAGAACAGTGCTATGGGAACATGGGGATGTTAGAT…
Chr01	GmHk_01G000079.1	808579	818587	+	ABCB8_0	Putative ABC transporter B family member 8	GO:0005524;GO:0016021;GO:0016887;GO:0042626;GO:0055085	IPR003593;IPR011527;IPR017871;IPR027417;IPR036640	PF00005;PF00664	cd03249		(ABC) transporter	V	MGSPKMDEAETRKLEMERKERASIATILRYADWIDVVLMLMGAVGAIGDGMSTNVLLLFASRIMNSLGYSNNLQSTKTYMAEVEKCSLYFVYLGLAAMVVAFMEGYCWSKTSERQVLKIRYKYLEAVLRQEVGFFDSQEATTSEIINSISTDTSLIQEVLSEKVPLFLMHSSSFISGVAFATYFSWRLALVAFPTLLLLIIPGMIYGKYLIYLSKSTVKEYGKANSIVEQALSSIKTVYSFTAEKRIIGRYSDILCRTSRLGIKQGIAKGIAVGSTGLSFAIWAFLAWYGSRLVMYKGESGGRIYASGISFIMCGLSLGVVLPDLKYFTEASVAASRIFDMIDRTPLIDGEDTKGLVSESISGRLDFEHVKFTYPSRPDMVVLNDFNLQVEAGKTVALV…	ATGGGTTCTCCAAAAATGGATGAGGCTGAGACACGTAAGTTAGAGATGGAAAGAAAAGAGAGAGCTTCCATAGCAACTATTTTGAGATATGCTGATTGGATTGATGTTGTGCTCATGTTAATGGGTGCTGTGGGAGCAATAGGAGATGGCATGTCCACAAATGTTTTGTTGCTCTTTGCTAGCCGTATCATGAACAGCTTAGGTTACAGTAATAACCTACAAAGTACCAAGACTTACATGGCTGAGGTTGAAAAGTGCAGCTTATATTTTGTCTACTTGGGATTAGCAGCAATGGTGGTGGCCTTCATGGAAGGGTATTGCTGGAGCAAGACAAGTGAGAGGCAGGTACTGAAAATTCGTTACAAGTACTTGGAAGCTGTCCTAAGACAAGAAGTAGGG…
Chr01	GmHk_01G000080.1	821161	822224	-	PHP2	Pseudo histidine-containing phosphotransfer protein 2	GO:0000160					Histidine kinase	T	MESSDEMHSKIITMKQSFFDEGFLIPTQFQELELLQDRDNMNFVRDVFCLFFTDMTRQFSEIEQILREEIDGQPREDMNRLLQRLKGSVLSIGALKILNGVNKMIQLSEEGNLERIMAAFEQVKMESVNLRAKVEPYFQVINAH	ATGGAGAGTTCCGATGAGATGCACAGCAAAATTATAACGATGAAACAATCTTTCTTCGATGAGGGATTTCTGATTCCAACCCAGTTTCAAGAGCTGGAGCTGCTACAAGACAGAGACAATATGAACTTTGTTAGGGATGTTTTTTGTTTGTTCTTCACGGATATGACTAGACAGTTTTCTGAGATTGAGCAAATTCTTCGAGAAGAAATTGATGGTCAGCCAAGGGAAGACATGAATAGGTTACTTCAACGACTCAAGGGAAGTGTGTTAAGCATTGGTGCTCTCAAGATTTTGAACGGAGTCAATAAGATGATACAACTTTCCGAAGAAGGCAACTTGGAAAGGATCATGGCTGCTTTTGAACAGGTGAAGATGGAGAGTGTAAATCTTAGGGCGAAA…
Chr01	GmHk_01G000081.1	824637	829157	+	hxnY_0	2-oxoglutarate-Fe(II) type oxidoreductase hxnY	GO:0016491;GO:0055114	IPR026992;IPR027443	PF03171;PF14226			2OGFe(II) oxygenase	S	MGKQSTPQFSALNCIDLSNPDINQSVNLLKEACLDSGFFYVVNHGISQEFMDEVFAQSKKFFSLPHNEKMKTLRNEQHRGYTPVLDELLDPENQVHVGDYKEGYYIGVEKGEDDPQSKKPFYGPNNWPAPDVLPGWRETMEKFHLETLEVGKAVAKMIALALDLDANYFDRPEILGEPIAILRLLHYEGQVSDPSKGLYGAGAHTDFGLITLLATDDVPGLQICRDRDAKPQKWEDVAPLKGAFIVNLGDMLERWSNCVFKSTLHRVLGNGQGRYSIAYFLEPSLDCLVECLPTCKSDSNPPKYPPILCHDYMTQRYKDTHADLNIYKKQQA	ATGGGAAAACAGAGCACACCCCAATTCTCTGCCCTCAACTGCATCGATCTCTCCAACCCCGACATCAACCAATCCGTCAACTTACTCAAAGAGGCATGTTTGGATTCCGGTTTTTTCTACGTTGTCAATCATGGAATAAGCCAGGAATTCATGGACGAGGTTTTTGCGCAGAGCAAGAAGTTCTTCTCTCTTCCTCACAACGAGAAGATGAAGACTCTCAGGAATGAACAACACAGGGGATACACCCCTGTTCTTGATGAGTTGCTTGATCCTGAAAACCAAGTACATGTAGGAGATTACAAAGAGGGGTATTATATTGGAGTTGAAAAAGGTGAAGATGATCCACAATCGAAGAAACCTTTTTATGGACCGAATAACTGGCCCGCACCAGATGTTCTG…
Chr01	GmHk_01G000082.1	831758	836145	-	MAOX_0	NADP-dependent malic enzyme	GO:0004470;GO:0004471;GO:0051287;GO:0055114	IPR012301;IPR012302;IPR015884;IPR036291;IPR037062	PF00390;PF03949	cd05312		malic enzyme	C	MESTLKALRDGESVLDLSPRSTVSGGVEDVYGEDHATEDQLVTPWNFSVASGYCLLRDPQYNKGLAFTEKERDAHYLRGLLPPTITSQQLQGKQLINNIRQYQVPLQKYQAMMELQASFFNSSYIETNERLFYKLLIDNVEELLPIVYTPVVGEACQKYGSIFKRPQGLFISLKEKGKILEVLKNWPEKSIQVIVVTDGERILGLGDLGCQGMGIPVGKLALYTALGGVRPSACLPITIDVGTNNEKLLNDEFYIGLRQKRATGQEYSELLHEFMTAVKQNYGEKVLVQFEDFANHNAFELLAKYGTTHLVFNDDIQGTASVVLAGVVAALKLIGGTLADHTFLFLGAGEAGTGIAELIALEMSKQTKTPIEETRKKIWLVDSKGLIVGSRKASLQHFK…	ATGGAGAGCACACTTAAGGCCCTGAGAGATGGTGAATCAGTGCTTGATCTGAGTCCAAGATCCACCGTCAGCGGCGGCGTCGAAGATGTCTACGGTGAAGATCATGCTACTGAAGACCAACTTGTCACCCCATGGAATTTCTCAGTTGCCAGTGGGTATTGTTTGCTTAGAGATCCACAATACAACAAAGGGCTTGCTTTCACTGAGAAAGAGAGGGATGCACACTATTTGCGTGGACTACTACCTCCAACAATTACCTCCCAGCAACTTCAGGGGAAGCAGTTGATAAACAATATCCGACAGTATCAGGTTCCCTTGCAAAAGTATCAGGCTATGATGGAACTTCAGGCAAGCTTTTTCAACTCATCATATATAGAGACAAATGAAAGGCTGTTTTAC…
Chr01	GmHk_01G000083.1	842405	844243	-	SKIPA_0	SNW/SKI-interacting protein A	GO:0000398;GO:0005681		PF02731			SNW domain containing 1	A	MATLKELLPPAKSSSTAYYDHTNDPWFKQRFSSEEEEKSAAAAAAKQKPVPPYLKRAGFVPRKIEDFGDGGAFPEIHVAQYPLDMGREKSGAKPGSKILPVTVDANGNVAYDAIVRQSENARKIVYTQQKDLIPKFLKNDEDDDDVVSDDEAQKQIEETMQETKAALEKIVNVRLSAAQPKNVPKQNSDAKYIKYKPSQQSDAFNSGAKERVIRMVEMPVDPLEPPKFKHKRVPKASGSPPVPVMHSPPRPVTVKDQQDWKIPPCISNWKNPKGYTIPLDKRLAADGRGLQEVQINDNFAKLSEALYVAEQKAREAVAMRSKVQKEMMLKEKERKEQELRALAQKARSERIGGERIGVVPAAPPAVAVDEDDMRVDYEHEKENPRERDRERSFVKESRE…	ATGGCCACTCTGAAAGAGCTTCTTCCTCCTGCAAAATCCTCCTCCACCGCCTACTACGACCACACCAACGATCCATGGTTCAAGCAGCGTTTCTCCTCAGAAGAGGAGGAGAAATCCGCCGCCGCCGCCGCCGCCAAGCAGAAGCCCGTTCCCCCCTACCTGAAGCGCGCCGGCTTCGTTCCTCGGAAAATCGAGGACTTCGGAGACGGCGGCGCCTTCCCTGAGATCCACGTTGCACAGTATCCTCTCGACATGGGAAGAGAAAAGTCCGGCGCCAAACCTGGATCCAAAATCCTCCCTGTCACCGTCGACGCTAACGGCAACGTTGCCTACGATGCCATCGTGAGGCAAAGCGAGAACGCAAGAAAAATTGTCTACACGCAGCAGAAGGATCTTATC…
Chr01	GmHk_01G000084.1	846226	858347	-	RDR5	putative RNA-dependent RNA polymerase 5	GO:0003968		PF05183			rna polymerase	K	MAENHNHRDLLILPPSVEALIESICRDQNRPPLDYSTRHRLKLQGEEQSLRILNKIAATRIRLSFAGFVNHMLDDINHQNNNNNNNNNNKNNSHSQPEPSTRQQTSPTRPPRPTPSSLLHALGELEFRKAFLILSYIGRESLENCITDAKIRSLKDLPMAKFEKTIWEDFGEKCIYDQSDRQLHRDWNSGRTHVYQCFVFPDGNLRFKGPILQSTRTHLQKTLGDDNVLLVKFAEDGSGKNFRTHAEEANALYGKFGKEGIRVGLRLYRFFVFKDGGNEEKQKDPTSSTVKCYFVRMQSGCSADEGADYILSNKTVSEARTLFMHAHMLLPNLNKYMARFSLILSKTLKLNIDLTTVSVQKIPDEYCKDANGNIMVDNEKPRILTDGTGFISRDLALLC…	ATGGCAGAAAATCACAACCACCGTGACCTGCTTATTCTTCCGCCCTCGGTGGAGGCTCTGATCGAGAGCATCTGCCGCGACCAGAACCGGCCTCCGCTCGATTACAGCACCCGCCACCGTCTCAAACTACAGGGCGAGGAACAATCCCTTCGCATTCTCAACAAAATCGCCGCCACCCGTATCCGATTATCTTTCGCAGGCTTCGTCAACCACATGCTCGACGACATCAACCACCAAAACAATAATAATAATAACAATAACAACAATAAAAACAATTCTCACTCTCAACCTGAGCCCTCCACGCGACAACAAACCTCTCCCACGCGCCCTCCCCGACCCACGCCCTCCTCGCTATTGCACGCGCTCGGAGAATTGGAGTTCCGAAAAGCCTTTCTCATT…
Chr01	GmHk_01G000085.1	864525	864826	+	-	hypothetical protein							R	MLRNGQEVAVPPNTILNTVNAKDQIYGEVSMSFAVRWKDVLDRLWHFIDKDQNFHTVIYNQNLDKPVIVAG	ATGTTGCGAAATGGCCAAGAGGTCGCGGTTCCACCAAATACTATTTTAAACACCGTTAACGCCAAAGACCAGATTTACGGTGAAGTTAGTATGTCATTTGCTGTGAGGTGGAAAGACGTACTTGACCGCTTATGGCATTTCATTGACAAGGATCAAAATTTCCATACCGTTATCTACAACCAAAATTTGGACAAACCAGTCATTGTAGCAGGGTGA
Chr01	GmHk_01G000086.1	867041	868392	+	rpsF_0	30S ribosomal protein S6	GO:0003735;GO:0005840;GO:0006412;GO:0019843	IPR014717;IPR035980	PF01250	cd15465	TIGR00166	Binds together with S18 to 16S ribosomal RNA (By similarity)	J	MPPYDCMFLFKPHIRKEAVMDLVVRVGKHVCRRNGVVTDIKSLGKVQLGYGVKKLDGRYYQGLLMQMSMMATPEINKELHYLNKEDRLLRWLLVKQRNTKFGLDSYGDEGRYELSKLSQIGKHGDEDEDEDDEEYEVNEEETVN	ATGCCTCCTTATGATTGTATGTTTCTGTTTAAGCCCCATATAAGGAAGGAAGCTGTCATGGATTTAGTTGTGAGGGTGGGAAAGCATGTGTGCAGAAGAAATGGGGTTGTCACTGATATCAAGAGTCTCGGAAAAGTTCAGTTGGGCTATGGTGTGAAAAAGCTAGATGGCAGATATTATCAGGGCCTACTGATGCAAATGAGCATGATGGCTACACCTGAAATCAACAAAGAGTTGCATTACCTAAACAAGGAAGACCGGTTACTGCGTTGGCTTTTGGTTAAGCAGCGTAATACAAAATTTGGGCTTGACTCCTATGGTGATGAAGGTAGATATGAGCTAAGCAAATTGTCCCAGATCGGTAAACATGGTGATGAGGATGAGGATGAAGATGATGAG…
Chr01	GmHk_01G000087.1	869879	877732	-	GC1_0	Golgin candidate 1	GO:0007030		PF09787			NA	U	MDSWLKAAEGLFEVVDRRAKAVASDLSEEQGDLKSPASNGQGSQGKKTKSKPKAQKGLSDSSTTISDTTQEKSGSPSAPADIATSIDKVDPEIIDGSASTSTNQPKEPRPSDATSPLLGSSLSKMLGDDVGKHDPDDVETLVNDADIGVATIAANGDTVQESASDVCEMDPPPAPKEIEGPSDEPTSTGQIIKSRDLDASKNVDIEKSESVASDTAPNNDTILKDSDVKLESVVDEKSQEDHKTDISPKKVQDQLDEAQGLLKTTKSTGQSKEARLARVCAGLSSRLQEYKSENAQLEELLTSERELSKSYEASIKQLQKDLSESKREVTRVESNMVEALAAKNAEIEALLSSMDAVKRQAALSEGNLASLQASMESMMRNRELSETRMMQALREELAS…	ATGGATTCGTGGCTCAAAGCCGCTGAAGGTTTATTTGAAGTTGTAGATCGACGAGCGAAGGCTGTTGCCAGTGACTTATCAGAGGAGCAGGGTGATCTTAAGTCTCCAGCATCAAATGGGCAAGGATCTCAGGGCAAGAAGACAAAATCAAAACCAAAGGCTCAAAAGGGACTATCCGACTCATCAACTACAATTAGTGATACTACTCAGGAGAAAAGTGGATCTCCATCAGCACCTGCGGACATAGCAACTTCAATAGACAAAGTTGATCCTGAAATAATTGATGGGAGCGCTTCAACATCTACAAACCAACCAAAGGAGCCACGACCTAGCGATGCAACATCACCCTTGTTAGGCTCTTCATTATCAAAAATGCTAGGCGATGATGTTGGTAAACAT…
Chr01	GmHk_01G000088.1	887076	887678	-	-	hypothetical protein		IPR008480	PF05553			Avr9 Cf-9 rapidly elicited protein 146	S	MEMEASPKQIVARKLWNIGRIVFLMLRKSKLAADFNLNLLLKRGKLAATKAIANTILTLHLHRSQNDDDAVYYPRDYEFSCSNSPALFHVIKRSTNKHHRRRHRHYDDDVSTVQKVLEILNNNNNNKVATASPLPGFGKSPIGRKLRITDSPFPLKDEEGGDNQVDVAAEEFIKRFYKDLDLQQKMAAIESPYRYNLWDR	ATGGAAATGGAAGCAAGCCCAAAGCAAATAGTGGCAAGGAAGCTATGGAACATAGGACGCATAGTGTTCCTGATGTTGAGAAAGAGCAAACTCGCCGCTGACTTCAACCTCAACTTGTTGCTCAAACGCGGCAAGCTCGCCGCCACAAAGGCCATAGCCAACACCATCCTCACGCTCCACCTCCACCGCTCCCAAAACGACGACGACGCCGTTTATTACCCGCGCGACTACGAGTTCAGCTGCAGCAACAGCCCCGCGCTCTTCCACGTCATCAAACGCAGCACCAATAAGCACCACCGCCGCCGCCACCGCCACTACGACGACGACGTTTCCACCGTTCAGAAAGTGCTCGAAATACTCAACAACAACAACAACAACAAGGTCGCTACTGCTTCTCCG…
Chr01	GmHk_01G000089.1	902575	903096	+	LFS_0	Lachrymatory-factor synthase		IPR019587;IPR023393	PF10604	cd07821		Polyketide cyclase / dehydrase and lipid transport	S	MEPIEQGSQPEKEKWKGKATTEVKGAKAEQVWPLLEDFFGLDKWFPTLSTCIPVEGISGQPGCVRFCAGFKTPVDDGKQTVNWTKQKLLFIDPTQRVFSYSIVDGNVGFHSYVSTLKVLPMAEGCEIEWLYEVEPVEGWKLEHLDSFIDTGLQVMAQRMQAALKTMEEAVFMA	ATGGAGCCAATTGAACAAGGAAGCCAACCTGAAAAGGAAAAATGGAAGGGCAAGGCCACAACAGAAGTAAAAGGAGCCAAAGCAGAACAAGTTTGGCCTCTTTTGGAGGATTTCTTTGGCCTTGACAAGTGGTTCCCCACTCTCTCTACATGCATTCCAGTTGAAGGTATCTCTGGCCAACCTGGGTGTGTTCGCTTCTGCGCTGGTTTCAAGACCCCTGTGGATGATGGCAAACAAACTGTGAATTGGACTAAGCAGAAACTGCTATTCATTGACCCAACTCAACGGGTTTTTAGCTATTCGATCGTGGATGGGAATGTAGGATTTCACTCCTACGTTTCAACTTTGAAGGTGCTGCCAATGGCTGAGGGGTGTGAGATTGAGTGGCTATATGAAGTT…
Chr01	GmHk_01G000090.1	909296	917682	+	STT3A_0	Dolichyl-diphosphooligosaccharide--protein glycosyltransferase subunit STT3A	GO:0004576;GO:0006486;GO:0016020		PF02516			oligosaccharyl transferase STT3 subunit	S	MAASNAHNGTTTNSIRHAFGNVLAFFILLLIGVLAFSIRLFSVIKYESVIHEFDPYFNYRVTQFLTKNGIYDFWNWFDDRTWYPLGRVIGGTVYPGLTLTAGTLWWVLNSLNIPLSVETVCVFTAPIFSAFASWATYLLTKEVKGAGAGLTAAVLLAMVPSYISRSVAGSYDNEAVAIFALIFTFYLYIKTLNTGSLFYATLNSIAYFYMVCSWGGYTFIINLIPMHVLLCIVTGRYSSRLYIAYAPLVVLGTLLAALVPVVGFNAVMTSEHFASFLVFIIIHVVALVHYIKGILSPKMFKVAVALVVSVGLAVCCAMVAVLVALVASSPTKGWSGRSLSLLDPTYASKYIPIIASVSEHQPPTWPSYFMDINVLAFLVPAGIIACFSPLSDASSFVVL…	ATGGCGGCCTCCAATGCTCACAACGGCACCACCACCAACTCCATCAGGCACGCCTTCGGCAACGTCCTCGCGTTCTTCATCCTTCTCCTGATCGGCGTTCTGGCCTTCTCGATCCGTCTCTTCTCCGTTATAAAGTATGAGAGTGTTATCCACGAGTTTGATCCTTATTTCAACTATAGAGTCACCCAGTTTTTGACAAAGAATGGGATATACGATTTCTGGAACTGGTTTGATGATCGAACTTGGTATCCCCTCGGTCGTGTAATTGGTGGGACTGTCTATCCTGGTTTGACGTTGACAGCAGGCACCTTATGGTGGGTACTGAATTCCCTAAACATACCTCTCTCAGTTGAAACTGTTTGTGTGTTTACTGCACCTATATTCTCAGCCTTTGCTTCA…
Chr01	GmHk_01G000091.1	921238	926491	-	PATROL1_0	Protein unc-13		IPR014770;IPR014772	PF05664			Protein of unknown function (DUF810)	S	MSAKRHNQSAGMPVHSVEDLPGAPFGDAGSSFSESELRETAYEILVGACRSSGPKPLTFISQSERGDRDRAAPAPSLHRSLTSTAASKVKRALGLKTSSSRGSSKRAATTGELVRVQMRISEQSDTRIRRALLRIAAGQLGKRMESVVLPLELIQLFRSLDFPTQQEYEAWLRRNLKVLEAGLLLHPHLPLDKSDPSAQSLQHIIHRAFEKPMDIGKNGESMQTFRTVVMSLACRSSDGSISETCHWADGFPLNLWIYQTLLEACFDLHAESSVIEEVDEVLELIKKTWVMLGINEMLHNICFAWILFHRYVVTGQVENDLLFASSNLLAEVGKDTGGSKDPIYSKILRNTLSLILSWAEKGLLAYHHTFHNGNIESMESVVSLAVLSAKILEDISHDY…	ATGTCCGCAAAGAGGCACAATCAAAGCGCCGGCATGCCGGTTCACTCGGTTGAGGATCTTCCCGGAGCTCCGTTCGGCGACGCGGGTTCGAGTTTCTCCGAATCGGAGCTCCGGGAGACGGCCTACGAGATCCTCGTGGGGGCGTGCCGGAGTTCGGGGCCGAAGCCGCTGACTTTCATATCGCAGTCGGAGAGGGGGGATCGGGATAGGGCGGCGCCGGCGCCGTCGTTGCACCGGTCGCTGACTTCGACGGCGGCGAGCAAGGTGAAGAGGGCGCTGGGGCTCAAAACGTCGTCGTCGAGGGGAAGCAGCAAGCGCGCCGCGACGACGGGGGAGTTGGTGAGAGTGCAGATGAGGATTTCGGAGCAGAGTGATACCAGAATTAGAAGAGCACTGCTC…
Chr01	GmHk_01G000092.1	935432	937427	+	IFRH_0	Isoflavone reductase		IPR008030;IPR036291	PF05368			Isoflavone reductase	S	MTKREVGLCWSILRRQWERARFFVVGGTGYVGRRIVKASLEQGHETYVLQRPEIGLDIEMMQMLLSFKKQGAHLVEASVSDHQNLVEAVKLVDVVICTMSGVHFLLSQLVGAAQTCGGHQGCREHQAVYMDEDDVATYTVKTIDDPRTLNKTVYLRPPENILTQRQLIEKWEKLIGKQLEKSSINEQDFLASMKGCLTNFEIGEGGEEASELYPEVKYTRMDEYLKVYI	ATGACCAAACGTGAAGTTGGCCTTTGCTGGTCCATTTTGCGCAGGCAATGGGAAAGAGCAAGGTTCTTTGTTGTGGGGGGAACTGGGTATGTTGGGAGGAGAATAGTGAAAGCAAGTTTAGAACAAGGCCATGAAACCTATGTTCTTCAACGTCCAGAGATAGGTCTAGACATTGAGATGATGCAGATGCTGCTTTCATTCAAGAAGCAAGGTGCTCACCTTGTGGAGGCTTCTGTCTCTGATCACCAGAACTTGGTGGAAGCTGTGAAGCTTGTGGATGTTGTGATTTGCACCATGTCTGGGGTTCATTTTTTGCTCTCACAACTTGTTGGTGCAGCTCAAACTTGTGGAGGCCATCAAGGCTGCAGGGAACATCAAGCTGTTTATATGGATGAAGAT…
Chr01	GmHk_01G000093.1	938394	940901	-	PHL11_0	Myb family transcription factor PHL11	GO:0003677	IPR006447;IPR009057;IPR017930;IPR025756	PF00249;PF14379		TIGR01557	Myb-like DNA-binding domain	K	MEGGGREGYNGVIMTMTRDPKPRLRWTADLHDRFVDAVTKLGGPDKATPKSVLRLMGLKGLTLYHLKSHLQKYRLGQQAQKQNEEVHKENSRCSYVNFSNRSLAPNTSYRGDDEGGEIPIAEALRCQIEVQKRLEEQLKVQKKLQMRIEAQGKYLQSVLEKAQRSLSLDGPGSLEASRAELTEFNSALSNFMENMNKDSKQNIIEVNNFYSKSHGSAFYNQEVGREQNRDQKPKVEGGSIQFDLNIKGSNDLVSAGGAEMDANMVSSYRV	ATGGAGGGTGGTGGAAGAGAAGGTTATAATGGAGTCATCATGACGATGACACGAGACCCAAAGCCGAGGCTACGGTGGACGGCAGATCTCCATGACCGGTTTGTGGATGCAGTCACAAAGCTTGGTGGCCCCGATAAGGCGACTCCCAAGTCTGTTCTGAGGTTAATGGGCTTGAAAGGGCTGACACTATATCATTTGAAGAGCCATTTACAGAAGTATAGACTTGGACAGCAGGCTCAAAAACAAAATGAGGAAGTGCACAAAGAGAATAGTAGATGTTCGTATGTAAATTTTAGTAATCGTTCTTTGGCACCAAACACCAGTTACAGAGGTGATGATGAAGGGGGAGAAATCCCAATAGCAGAAGCATTGAGGTGTCAGATTGAAGTTCAAAAGAGA…
Chr01	GmHk_01G000094.1	953873	957210	+	-	hypothetical protein		IPR036259				NA	S	MKEVTVEAEGGAPGVVQEGGKGTTVRPDIHNSAMKILRAREPYNGYTEEVGEKPSGFEVMGWYLYEFCFYFVQTVLVPVVFPLIISQLQPLPAADSLQEWNKNHPTKHCSQKEFHLYSKLTNHTIRTSGGSNFSALEWTSIAWATGLALAAPILGFISFHLDGHFPKLITAAATGIGVFFCLPAGFFKVTAIFIPYIAGIVAASTVASAAHTHHLGLMIRCFTGPTLKRSEFSIRQAVSSRLSLHATAAGCLGAALISSFTYHMLRELNYNDRDVMSLWVVSIFSGLIWLVGVLHIVTAIGRTTDSISFSSRLHPFSIFKYPHAIGGLAGVFLSSFTTMSIFTGGVIFIVGQLCIKPLHLLYLWLTYFLFPLVSLSLLQPLLHVIKMNSVKMQIVGFLL…	ATGAAAGAGGTGACGGTTGAAGCTGAAGGAGGAGCACCAGGAGTGGTGCAAGAGGGTGGAAAAGGAACCACGGTTAGGCCAGACATACACAACAGTGCCATGAAAATTTTGAGGGCTAGAGAGCCTTATAATGGGTACACTGAGGAAGTGGGAGAGAAGCCCTCAGGGTTTGAGGTTATGGGGTGGTACCTTTATGAGTTTTGCTTCTACTTTGTTCAAACTGTGCTTGTTCCTGTTGTGTTCCCTCTCATTATCAGTCAGCTACAGCCTCTCCCTGCTGCAGATTCACTTCAGGAATGGAACAAAAACCACCCAACCAAGCACTGCTCACAAAAGGAATTTCATCTGTATAGCAAACTGACAAATCACACCATAAGAACCAGTGGTGGATCAAACTTC…
Chr01	GmHk_01G000095.1	960752	963999	+	-	hypothetical protein	GO:0003735;GO:0005840;GO:0006412	IPR037229	PF01632			ribosomal protein L35	S	MLRSLTKLRCFAAVQSRQVLSPPSSRRLLHHSPPPQPLHSASNFRISRPSFISSSWPLHASHPSPSLVQVRHASSKERKRKPVPPTVSKVKKTKMKSYSSFKSRFRTMNDGNIRRWKEGKRHNAHLKSKKSKRRLRKPGIVPVAYAKVMKKLNFSA	ATGCTTCGTAGCTTGACGAAACTTCGTTGTTTCGCCGCCGTTCAATCACGCCAAGTTCTATCACCTCCCTCTTCTCGCCGTCTCCTCCACCACTCGCCGCCGCCGCAACCGCTTCACTCCGCTTCCAATTTCCGCATTTCTCGTCCTTCCTTCATTTCCTCCTCATGGCCTCTCCACGCATCTCATCCTTCCCCTTCCTTGGTTCAAGTGCGACATGCTTCGTCCAAGGAGAGAAAGCGAAAGCCGGTGCCTCCAACCGTTTCCAAGGTTAAGAAAACCAAAATGAAATCTTATTCGTCTTTCAAGTCCAGATTCAGAACAATGAATGATGGGAACATCAGGCGCTGGAAGGAGGGCAAGCGTCACAATGCTCATCTCAAGTCAAAGAAATCAAAACGT…
Chr01	GmHk_01G000096.1	966365	970310	-	PLGG1_0	Plastidal glycolate/glycerate translocator 1, chloroplastic		IPR007300	PF04172			cytolysis	M	MGTSKSCKSEELCTELLESQTGDTSTGSVIQTLRLQVFGVLHWVVSLGLILAIDFLLKKAFVAASIEFPSALFGMFCIFSVLIILDCAIPSAAVALMKFFEPGIMFIQRWLPLFYVPYLVVLPLSLKDIPPSSAIKICFIVVGGWLATLCVTGMTAIGVRKAVKTELIDAEPMEKPSPFSSIELWAWTGIFLISFVASLVYPTALGTRARTYLPFLLASTVLGYMIGSGLPSSVKKVLHPIIFCAASAEVTAVVFGFLSKSGLDPVLGYYLTNSSSDPGAGDILMGFLGSVILSFAFSMFKQRKLVKRHAAEIFTSVIISTLFSLYSTALVGRLVALEPSLTVSILPRCITVALALSIVSFFEGANASVTAAAVVVTGLVGANFVQATLDKLRLRDPIA…	ATGGGTACCTCGAAAAGTTGCAAAAGTGAAGAACTTTGCACAGAACTACTCGAATCCCAAACTGGGGACACTTCCACTGGGTCTGTGATTCAAACTTTGCGTCTTCAAGTATTTGGGGTGCTACATTGGGTTGTTTCACTAGGCCTCATTCTGGCCATTGACTTTCTCTTGAAGAAAGCCTTCGTAGCAGCTTCGATTGAGTTCCCAAGTGCTCTGTTTGGGATGTTCTGTATTTTCTCTGTTTTGATTATTCTTGATTGTGCTATACCTTCTGCTGCTGTGGCTTTGATGAAGTTTTTTGAACCAGGGATTATGTTCATTCAGAGATGGCTCCCTTTGTTCTATGTTCCCTATTTGGTTGTGCTGCCCCTTTCTCTTAAAGATATTCCCCCTTCTTCT…
Chr01	GmHk_01G000097.1	972370	977334	-	4CLL6_0	4-coumarate--CoA ligase-like 6	GO:0003824	IPR020845;IPR025110;IPR042099	PF00501;PF13193	cd05904		Amp-dependent synthetase and ligase	IQ	MATNANCEMPLTHHPHWFSPKSGIYHSKHAPVDLPNDPFLDLVSFIFSHRHNGVSALVDSSSGCSISYPKLLPLVKSVASGLHRMGVSQGDVVLLLLPNSIYYPIVFLAVLYIGAIVTPLNPLSSVYEIRRQVSECGVSLAFTVPENEKKLEPLGISVIAVPENEKGLKDGCFSCFCDLISCDFDLPKRPVIKQDDTAGILYSSGTTGVSKGVVLSHKNLVAMVELFVRFEASQYEGSCLRNVYLAVLPMFHVYGLSLFAVGLLSLGSTVVVMRKFDIDEVVRVIDEYKVTHFPVVPPMLTALIKRAKGVNGGEFQSLVQVSSGAAPLSMGVINEFIRAFPNVDFIQGYGMTESTAVGTRGFNTEKFRNYSSIGLLAPNMEAKVVDWNTGAFLPPGSSG…	ATGGCAACAAACGCAAACTGCGAAATGCCCCTCACACACCACCCTCATTGGTTCTCTCCAAAATCCGGAATTTACCACAGCAAACACGCCCCCGTGGACCTTCCCAACGACCCTTTTCTCGACCTTGTTTCCTTCATTTTTTCCCACCGCCACAATGGGGTTTCGGCCCTCGTTGATTCTTCATCTGGGTGTTCCATTTCCTACCCAAAGTTGCTACCTTTGGTAAAATCCGTTGCTTCTGGTCTTCACAGAATGGGTGTTTCACAAGGTGACGTGGTTCTGCTTCTTCTCCCTAATTCCATTTACTATCCCATTGTGTTCTTGGCTGTTCTCTATATAGGTGCTATTGTTACACCCTTGAATCCTCTTAGTAGTGTCTATGAAATACGCAGGCAGGTT…
Chr01	GmHk_01G000098.1	979796	986337	-	At1g32090_0	CSC1-like protein At1g32090	GO:0016020	IPR027815;IPR032880	PF02714;PF13967;PF14703			transmembrane protein 63C	S	MATLADIGVSAAINILSAFAFLLAFALLRIQPINDRIYFPKWYISGDRSSPRRSGGNFVGKFVNLNFRTYLTFLNWMPQALRMSESEIISHAGLDSAAFLRIYTLGLNIFVPITLVALLVLIPVNVSSGTLFFLKKELVVSDIDKLSISNVPPKSIRFFVHIALEYLFTIWICFLLYKEYDHIASMRLHFLASQRRRVDQFAVVVRNIPHMSGHTISDTVDSFFQTNHPEHYIGHQAVYNANKFAKFAKRRDRLQNWLDYYQLKFERHPDKRPTVKNGFLGFWGGKVDAIEYYKHSIKELDTMMTMERQKIIKDPKSILPVAFLSFKSRWGASVCAQTQQSKNPTLWLTDWAPEPRDVYWQNLAIPFVSLNIRKLIISLSVFALVFFYMIPIAFVQSLA…	ATGGCAACCCTTGCAGACATTGGGGTCTCAGCTGCCATCAACATTCTCTCAGCCTTTGCCTTCTTGCTGGCTTTTGCTCTTCTGAGAATCCAACCCATCAATGATAGAATCTACTTTCCAAAGTGGTATATCAGTGGAGATAGAAGCAGTCCAAGGAGGTCTGGTGGGAATTTTGTGGGAAAATTTGTGAACCTCAATTTCAGAACTTACCTCACTTTCCTGAACTGGATGCCACAAGCTCTCAGAATGAGTGAGTCTGAGATTATTAGCCATGCTGGCCTTGACTCTGCTGCTTTCCTTAGAATCTATACTCTCGGCTTAAATATTTTTGTTCCAATCACACTTGTGGCACTCCTTGTACTTATACCAGTCAACGTATCAAGTGGGACATTATTTTTC…
Chr01	GmHk_01G000099.1	992314	996181	-	KPPR_0	Phosphoribulokinase, chloroplastic	GO:0005524;GO:0005975;GO:0008974;GO:0016301	IPR006083;IPR027417	PF00485	cd02026		uridine kinase	F	MAACTVYSTQSLSTNCSISTPSKTQLSFFHQKQVVFWRNSKKGSCSSRRSYVITCAAGDSQTVVIGLAADSGCGKSTFMRRLTSVFGGAAEPPKGGNPDSNTLISDTTTVICLDDYHSLDRTGRKEKGVTALDPRANDFDLMYEQVKALKDGIAVEKPIYNHVTGLLDPPELIKPPKILVIEGLHPMFDSRVRDLLDFSIYLDISNEVKFAWKIQRDMAERGHSLESIKASIEARKPDFEAYIDPQKQYADAVIEVLPTQLIPDDNEGKILRVRLIQKEGVKYFSPVYLFDDGSTISWIPCGRKLTCSYPGIKFFYGPETYYGNEVSVVEMDGQFDRLDELIYVESHLSNLSTKFYGEVTQQMLKHADFPGSNNGTGLFQTIVGLKIRDLYEQLIASKA…	ATGGCAGCTTGCACTGTCTACTCAACACAATCTCTGAGCACAAATTGCTCCATCTCAACCCCATCAAAGACGCAACTCAGTTTTTTCCACCAAAAGCAGGTAGTTTTCTGGAGGAACAGCAAGAAGGGCAGCTGCAGCAGCAGAAGAAGCTATGTGATAACATGTGCAGCAGGTGACTCACAGACAGTGGTGATTGGCCTGGCTGCAGACTCAGGGTGTGGGAAGAGCACCTTCATGAGGAGGCTGACCAGTGTGTTTGGAGGAGCAGCAGAGCCACCAAAGGGTGGCAACCCTGACTCCAACACTCTCATCAGTGACACCACCACTGTCATATGCTTGGATGATTACCACTCTTTGGACAGAACTGGAAGAAAGGAGAAGGGTGTCACTGCCCTTGAC…
Chr01	GmHk_01G000100.1	1000505	1005733	-	SCAMP4_0	Secretory carrier-associated membrane protein 4	GO:0015031;GO:0016021		PF04144			secretory carrier membrane protein	U	MNRHHDPNPFEEEEVNPFSNGTTAPASKSRIPPLASESLGFGQRHDATVDIPLDTTNDSKKKGQELAAWEADLKRREKEIKRREEAVSRAGVPVDDKNWPPFFPIIHHDIANEIPVHAQRLQYLAFASWLGIVLCLGFNVVAVTVCWIRGGGVKIFFLAVIYALLGVPLSYVLWYRPLYRAMRTDSALKFGWFFMLYLLHIGFCIFAAIAPPIVFHGKSLTGILAAIDVFSDHVLVGIFYLIGFGMFCLEALLSFWVLQKIYMYFRGHK	ATGAATCGCCACCACGATCCCAATCCCTTCGAAGAAGAAGAAGTCAATCCTTTTTCGAATGGCACTACTGCTCCTGCATCAAAGTCACGTATTCCACCATTAGCATCTGAGTCACTGGGCTTTGGTCAAAGGCATGATGCTACAGTTGATATTCCTTTGGATACTACAAATGACTCCAAGAAAAAAGGTCAAGAGCTAGCAGCTTGGGAAGCAGATTTAAAACGGAGAGAGAAGGAAATAAAAAGAAGAGAAGAGGCTGTTTCTAGAGCTGGTGTTCCTGTTGATGATAAGAATTGGCCTCCATTTTTCCCAATCATTCACCATGATATTGCCAATGAGATACCAGTTCATGCTCAGAGGCTTCAATATTTGGCCTTTGCAAGTTGGTTAGGAATTGTT…
Chr01	GmHk_01G000101.1	1008271	1012441	+	Os07g0301200_0	DEAD-box ATP-dependent RNA helicase 5	GO:0003676;GO:0005524	IPR001650;IPR011545;IPR014001;IPR014014;IPR027417	PF00270;PF00271	cd00079;cd00268		purine NTP-dependent helicase activity	L	MGRKHDAVLASEPVAEEAPCSPELDSEKKKKKKKKNKNKDKHQTESSPKRKLDEHDPQNGTESKKKKKKHHESKGNAEETNGDSNNNNGNGANREETATDGSVVVTGNNAGEAKYAAVKSFADSGLPENVLECCKGFEKPSPIQSRAWPFLLDGRDLIGIAATGSGKTLAFGIPAVMHVLGKRKGKSSKGRNPLGLVLSPTRELAQQISDVMCDAGRSCGVQSICLYGGTSKGPQISSLKSGIDIVIGTPGRIQDLIEMGICCLKEVSFVVLDEADRMLDMGFEQIVRSILGQTCSDRQMVMFSATWPLPVHYLAQEFMDPNPVKVVVGSEDLAANHDVMQIVEVLDDRSRDKRLVALLEKYHKSQRNRVLVFVLYKLEAKRVENMLQEGGWKVVSIHG…	ATGGGTCGGAAACACGACGCCGTTTTGGCCAGCGAACCTGTCGCCGAAGAAGCCCCCTGCAGCCCTGAGCTCGATTCCGAGAAGAAGAAGAAGAAGAAAAAGAAGAACAAAAACAAAGACAAGCACCAAACCGAAAGCAGCCCCAAACGAAAGCTCGACGAACACGACCCCCAAAACGGCACCGAATCGAAGAAGAAAAAGAAGAAGCACCACGAGTCCAAGGGGAACGCCGAGGAAACCAACGGCGATAGCAACAACAACAACGGCAATGGTGCTAATCGCGAGGAAACGGCGACGGATGGGTCTGTTGTGGTCACCGGTAACAATGCGGGAGAGGCGAAATACGCCGCGGTGAAGAGCTTCGCGGATTCGGGGCTGCCGGAGAACGTGCTGGAGTGC…
Chr01	GmHk_01G000102.1	1018090	1032455	+	RPM1_0	Disease resistance protein RPM1	GO:0043531	IPR003591;IPR027417;IPR032675;IPR038005;IPR041118	PF00931;PF18052	cd14798		leucine Rich Repeat	S	MADSSVSFLLDKLTLLLQAEVNLQRGVREDVQHIKYELERHRGILRVADALEDKDPELKAWVKRVRDVAHDMEDAIDEFSLRLVDQHGQGNSSSFHVNFFIRHRIASNIQNIKSRVDIISQGRPNIAGIGSGSSQRLRLDSQGDALLLEEADLVGIDKPKRQLSDLLFNEEAGRAVIPIYGMGGLGKTTLAKQVYDDPKVKKRFRIHAWINVSQSFQLEVLLKDLVQQLHNVIGKPSPEAVGQMKSDQLKELIKNLLQQSRYLIVLDDVWHVKVWDSVKLALPNNNRGSRVMLTTRKKDIALYSCAELGKDFNLEFLPEEESWYLFCKKTFQGNPCPPYLEAVCRNILKMCGGLPLAIVAIGGALATKNRANIEEWQMVYRSFGSEIEGNDKLEDMKKV…	ATGGCAGATAGTTCAGTATCGTTTTTACTGGACAAGCTGACTTTGTTACTTCAAGCAGAAGTGAATCTGCAGAGAGGGGTCCGTGAAGATGTTCAGCACATCAAATATGAACTAGAACGCCACAGGGGCATCTTGAGGGTGGCTGATGCTCTGGAAGACAAAGACCCTGAACTCAAAGCATGGGTTAAACGAGTAAGAGATGTTGCTCATGACATGGAAGATGCTATAGATGAATTTAGCCTTCGCCTTGTTGATCAACATGGACAAGGCAACAGTTCTTCTTTTCATGTGAATTTTTTCATCCGGCATAGGATTGCTTCAAATATACAAAATATCAAATCCAGAGTGGACATTATCTCCCAGGGACGTCCAAACATAGCTGGGATTGGCTCAGGCTCA…
Chr01	GmHk_01G000103.1	1035851	1042847	-	-	hypothetical protein						NA	S	MEKMSDDILLDDWEDALLEQLIQTEEQFVLTSSSSAPKPLPPPPPPPPSAVVSFSPPRELSQRPTTSITVDSPSPSPTPNPISDNKDLEIDRLKRELEQAAKQIANLEKERVKLKKERDKKEDQLKSISSRNEENACTKFSKSKSSDTGQNDRDFGTHAPNSHKISSKFQNGVSSNDPIVETTFKAKGVEIATVSHQEAQGALPLHDDLSAYLDLSQKLLAIWGSPTDNKMGTNVISKLLVGCQRDFHNLFGCMNMSLPSEITRDFLSDLSSSGVAFHYLKDRFHTPEAAKLSNFYLALTKIADGTGVLETLIEPLLDLSGMENVVIIHSSLCVLHMVLKLLLELEKNVGRRLMSGLGLITMMKTRENGMSSQCTLLRNNVFIEGLCVGKGYVDSGVKD…	ATGGAGAAGATGAGCGATGACATACTGTTGGACGATTGGGAAGACGCGTTGCTGGAGCAGTTAATCCAAACCGAAGAGCAGTTTGTCCTCACTTCCAGTTCCAGCGCACCAAAACCACTTCCTCCGCCACCGCCTCCGCCTCCTTCCGCCGTCGTTTCCTTCTCGCCCCCGCGAGAGCTCTCTCAGAGGCCCACCACAAGTATCACTGTCGACTCGCCCTCTCCCTCTCCCACTCCCAATCCAATCTCCGATAATAAAGACCTCGAAATCGACCGCTTAAAGAGGGAGCTGGAACAAGCGGCGAAGCAGATTGCAAATCTGGAAAAGGAGCGTGTCAAGTTAAAGAAAGAAAGAGACAAGAAAGAAGATCAGCTCAAATCCATATCTTCGAGGAATGAA…
Chr01	GmHk_01G000104.1	1047027	1050287	+	-	hypothetical protein						NA	S	MVGIFSRFSVGRNVHRRTQSALDEREVMPPNPEAVAAVASAATATSHGIEVAVEFKPVEHPIEPLDNDRPIQCPLPEPSILNDGRIWKERVSATVGRRGDLPVMKEGGTLESEDAGARPRTSRSNRMILPSVSAPEHNILKLLDECNASGI	ATGGTGGGTATATTTTCGAGATTCTCTGTCGGAAGAAATGTCCACCGACGAACGCAAAGTGCCCTGGATGAGAGGGAAGTGATGCCCCCAAACCCAGAGGCTGTTGCTGCAGTGGCAAGTGCTGCAACTGCCACTTCTCATGGAATTGAAGTGGCTGTGGAGTTTAAGCCAGTTGAACATCCGATTGAACCACTTGACAATGATAGGCCAATTCAGTGCCCGTTGCCAGAACCATCTATTCTTAACGATGGAAGAATATGGAAAGAACGAGTATCTGCTACTGTGGGGAGAAGAGGGGACCTGCCAGTGATGAAGGAAGGGGGAACACTTGAATCTGAAGATGCTGGAGCTAGACCACGAACATCCCGGTCTAACCGAATGATCTTACCATCTGTTAGT…
Chr01	GmHk_01G000105.1	1056363	1060695	+	RPN9B	26S proteasome non-ATPase regulatory subunit 13 B		IPR000717;IPR036390	PF01399			26S proteasome non-ATPase regulatory subunit	O	MAALQYLESLRNAHPELSDWYNSLADLYQNKLWHQLTLKLEQFVALAVFQAGDALIQLYHNFITDFETKINLLKLAHFAVIVSRQYAEKEAAVGYLGGVIQKLQDTREQRIEEPILYIKMQIAILKLEQGDQKECKKLLEDGKSTLDSMTDIDPSVYASYYWVSSQFHKTRQEFAEFYKSALLYLAYTSVESLSDSFKLDLAFDLSLSALLGDNIYNFGELLAHPIIKSLMGTKVEWLYYILQAFNAGDLLQYQELCRVHNAALRAQPALVQNEQKLSEKINILCLMEIIFSRPSEDRTIPLSVIAERTKLSIENVEHLLMKSLSVHLIEGIIDQVEGTVHVSWVQPRVLGIQQIKSLRDRLDSWTGKVHTALLSIEAETPDLIGS	ATGGCTGCTCTGCAATACTTGGAATCGCTGCGCAACGCGCATCCTGAGCTCTCCGATTGGTACAATTCGCTGGCGGATCTATACCAGAACAAGCTCTGGCACCAGCTTACCCTCAAGCTTGAGCAGTTCGTGGCTCTCGCCGTCTTCCAGGCCGGTGATGCATTAATACAATTATATCACAATTTCATCACAGACTTTGAGACCAAAATCAACCTTCTCAAGCTTGCGCATTTCGCTGTTATAGTTTCTCGGCAGTATGCTGAGAAAGAAGCTGCGGTTGGTTATCTTGGAGGGGTTATTCAGAAACTTCAAGATACTAGAGAGCAGCGCATAGAAGAACCTATTCTTTACATTAAGATGCAAATAGCAATATTAAAGCTTGAGCAAGGTGATCAAAAG…
Chr01	GmHk_01G000106.1	1065950	1071757	-	XLG3_1	Extra-large guanine nucleotide-binding protein 3	GO:0003924;GO:0007165;GO:0007186;GO:0019001;GO:0031683	IPR011011;IPR011025;IPR027417	PF00503	cd00066		Guanine nucleotide binding protein (G protein) alpha	S	MDQNRGESWRELVKKMLPPGASIPADASNLDYSIAMEYVGPPVSYDVPRVEPFDANSRAIPTAQPLSGSQRSSTHGGHMVIEPIPLPVSRIAGVTSSPNQSPRVSGSSDSVVSVLQNPDLSSASPSASPASVHNPPSNPPKPGNEAKRAPVVTFNTVDRRQRKEVEVVKPVYSEYVGVLKERKKKKIRVCYRCGKGKWETKESCIVCNAKYCSNCVLRAMGSMPEGRKCVTCIGQPIDESRRLKLGKYSRVLSRLLSPLEVKQIMKAEKECSANQLRPEQLIVNGLPLKPEEMAELLGCPLPPRKLKPGRYWYDKESGLWGKEGEKPDRIISSNLNFTGKLSLDASNGNTEVYMNGREITKLELRVLKLANVQCPRDTHFWVYDDGRYEEEGQNNIRGN…	ATGGATCAAAATAGGGGAGAGAGCTGGAGGGAATTAGTGAAGAAGATGCTTCCTCCTGGTGCTTCCATACCTGCTGATGCTTCTAATCTTGATTACTCCATAGCAATGGAATATGTTGGTCCACCAGTTTCATATGATGTACCAAGAGTTGAGCCCTTTGACGCAAACTCAAGAGCAATTCCCACTGCTCAACCACTCTCTGGATCACAAAGATCAAGTACTCATGGGGGCCATATGGTGATTGAACCAATCCCTCTACCGGTGTCTCGTATTGCTGGCGTAACGAGCTCTCCTAATCAAAGTCCAAGGGTGTCAGGAAGTTCAGATTCTGTGGTTTCTGTCTTACAGAACCCAGATCTTTCTTCTGCGTCACCTTCGGCTTCGCCTGCTTCAGTTCAT…
Chr01	GmHk_01G000106.2	1065950	1071757	-	XLG3_1	Extra-large guanine nucleotide-binding protein 3	GO:0003924;GO:0007165;GO:0007186;GO:0019001;GO:0031683	IPR011011;IPR011025;IPR027417	PF00503	cd00066		Guanine nucleotide binding protein (G protein) alpha	S	MDQNRGESWRELVKKMLPPGASIPADASNLDYSIAMEYVGPPVSYDVPRVEPFDANSRAIPTAQPLSGSQRSSTHGGHMVIEPIPLPVSRIAGVTSSPNQSPRVSGSSDSVVSVLQNPDLSSASPSASPASVHNPPSNPPKPGNEAKRAPVVTFNTVDRRQRKEVEVVKPVYSEYVGVLKERKKKKIRVCYRCGKGKWETKESCIVCNAKYCSNCVLRAMGSMPEGRKCVTCIGQPIDESRRLKLGKYSRVLSRLLSPLEVKQIMKAEKECSANQLRPEQLIVNGLPLKPEEMAELLGCPLPPRKLKPGRYWYDKESGLWGKEGEKPDRIISSNLNFTGKLSLDASNGNTEVYMNGREITKLELRVLKLANVQCPRDTHFWVYDDGRYEEEGQNNIRGN…	ATGGATCAAAATAGGGGAGAGAGCTGGAGGGAATTAGTGAAGAAGATGCTTCCTCCTGGTGCTTCCATACCTGCTGATGCTTCTAATCTTGATTACTCCATAGCAATGGAATATGTTGGTCCACCAGTTTCATATGATGTACCAAGAGTTGAGCCCTTTGACGCAAACTCAAGAGCAATTCCCACTGCTCAACCACTCTCTGGATCACAAAGATCAAGTACTCATGGGGGCCATATGGTGATTGAACCAATCCCTCTACCGGTGTCTCGTATTGCTGGCGTAACGAGCTCTCCTAATCAAAGTCCAAGGGTGTCAGGAAGTTCAGATTCTGTGGTTTCTGTCTTACAGAACCCAGATCTTTCTTCTGCGTCACCTTCGGCTTCGCCTGCTTCAGTTCAT…
Chr01	GmHk_01G000107.1	1087935	1093625	+	PCMP-H11_1	Pentatricopeptide repeat-containing protein At1g31920	GO:0000814;GO:0005515;GO:0008270;GO:0071985	IPR008570;IPR011990;IPR032867;IPR036388;IPR036390	PF01535;PF05871;PF13041;PF14432		TIGR00756	Pentatricopeptide repeat-containing protein	S	MSGTSVLCQSHLLSLPNSPPQSSELNAKFNEQGWLSLLKRCKSMEEFKQVHAHILKLGLFYDSFCGSNLVASCALSRWGSMEYACSIFSQIEEPGSFEYNTMIRGNVNSMDLEEALLLYVEMLERGIEPDNFTYPFVLKACSLLVALKEGVQIHAHVFKAGLEVDVFVQNGLISMYGKCGAIEHAGVVFEQMDEKSVASWSSIIGAHASVEMWHECLMLLGDMSGEGRHRAEESILVSALSACTHLGSPNLGRCIHGILLRNISELNVVVKTSLIDMYVKCGSLEKGLCVFQNMAHKNRYSYTVMIAGLAIHGRGREAVRVFSDMLEEGLTPDDVVYVGVLSACSHAGLVNEGLQCFNRMQFEHMIKPTIQHYGCMVDLMGRAGMLKEAYDLIKSMPIK…	ATGAGTGGGACATCTGTCCTTTGCCAATCCCATCTTTTGTCACTGCCAAATAGTCCACCCCAAAGCTCTGAATTGAATGCAAAGTTCAATGAGCAGGGATGGTTGTCTTTGCTCAAGAGATGCAAGAGCATGGAAGAATTCAAGCAAGTACATGCCCATATTCTAAAATTGGGTCTCTTCTATGATTCTTTCTGTGGCAGCAATCTTGTTGCCTCTTGTGCTCTATCTAGATGGGGCAGCATGGAGTATGCTTGCTCAATCTTCAGTCAGATTGAGGAACCTGGTAGCTTTGAGTACAATACCATGATTAGAGGAAATGTCAATAGCATGGATCTAGAAGAAGCTTTGTTGCTTTATGTTGAGATGCTTGAAAGAGGAATTGAACCTGACAACTTCACC…
Chr01	GmHk_01G000108.1	1094932	1098386	-	DAGLA_0	Sn1-specific diacylglycerol lipase alpha	GO:0006629	IPR029058	PF01764	cd00519		triglyceride lipase activity	S	MVLSKVVKKVTGRLEQMQPEAPKNTMQVVFMLAEAMRYGYTETLGTWNLFDLPTAIIHAVTDKDKKTVASECDERSDCVQLKAPGVLDELYEVKKLLTRAMLFSSRKRFGAFLFAAGFAKEDVLLRKRTARILKPAFTVIRDKESKCLFVFIRGTRSIKDTLTDAIAAPIPFSHRFISSDGKLRRNNTVSGHAHRGMVTAARWIRRHCTSTLLDALQENPDFKIKIIGHSLGGGTAALLTFMLREMKQFSSCTCVMCSDMANPSSQLYFFAAACMTLELAEFGKPFITSIINGYDIVPTLSASSVHDFIYKVHAQTTSPSLIKMGRIKDKNILTAVGSRLSFAKAITGHAVTRCTQVVKKHQQRTQSLLPCSQRENIETSDDLVKASQSWETSCETLLT…	ATGGTTTTATCAAAAGTGGTTAAGAAGGTTACCGGAAGGCTTGAACAGATGCAGCCTGAGGCGCCCAAAAACACTATGCAAGTTGTGTTCATGTTAGCAGAAGCCATGAGGTACGGTTACACCGAGACACTGGGTACATGGAACCTCTTCGACTTGCCCACAGCCATCATTCACGCTGTCACGGACAAGGATAAGAAAACAGTTGCAAGTGAATGCGATGAAAGAAGTGATTGTGTGCAGCTGAAAGCCCCAGGAGTCTTGGATGAGTTATATGAGGTGAAGAAATTGTTGACACGGGCCATGCTTTTCAGTAGCAGAAAACGGTTTGGAGCATTTTTATTTGCTGCTGGATTCGCCAAGGAGGATGTCCTCCTAAGAAAGAGAACAGCTCGGATTCTA…
Chr01	GmHk_01G000109.1	1125411	1126910	-	-	hypothetical protein						Lipase (class 3)	S	MTLELAEFGKPFIISIINGYDIVPTLSVSSVHDFISEGRDRSNDQNILTAVRSHIPIAKAIAGHAITRCTEVVKKHKHGTRSLLPWHIRENIDSSPSSKSDNIAEAYGSSETNFESLLTEEHLIMESMSDDDEYNSSSEGSDGDDSDGDEDELSNKVGKLKLGKEVATNKNIAEEESDCPITTSSRRRLYPPGRIMHIIPIAHSSENPNSNHNGCDEKHVSLYETPRELYGKLRLSRRMILDHKSNKYLKVLQQLINQLEKESFKYHGG	ATGACATTGGAGTTAGCCGAATTTGGGAAGCCCTTTATCATTTCCATTATCAATGGTTATGACATAGTGCCTACATTGTCAGTTTCTTCTGTTCATGATTTCATTTCTGAGGGTCGCGATCGGAGCAATGATCAAAACATCCTAACCGCAGTTAGATCTCACATACCAATCGCAAAAGCCATTGCAGGACATGCAATAACCCGCTGCACAGAGGTTGTGAAGAAACATAAACACGGAACTCGCTCATTGCTTCCCTGGCACATACGTGAGAATATTGACTCATCGCCAAGCTCAAAATCAGATAACATAGCTGAAGCTTATGGATCATCTGAGACAAATTTTGAATCTCTCTTGACTGAAGAGCACTTAATCATGGAGTCTATGTCAGATGATGACGAA…
Chr01	GmHk_01G000110.1	1133664	1135481	+	PCMP-H11_0	Pentatricopeptide repeat-containing protein At1g31920	GO:0005515;GO:0008270	IPR011990;IPR032867	PF01535;PF13041;PF14432		TIGR00756	Pentatricopeptide repeat-containing protein	S	MSGTSVLCQSHLLSLPNSPLQSSELNAKFNEQGWLSLLKRCKSMEEFKKVHAHILKLGLFYDSFCGSNLVASCALSRWGSMEYACSIFRQIEEPGSFEYNTMIRGNVNSMDLEEALLLYVEMLERGIEPDNFTYPFVLKACSLLVALKEGVQIHAHVFNAGLEVDVFVQNGLISMYGKCGAIEHAGVVFEQMDEKSVASWSSIIGAHASVEMWHECLMLLGDMSREGRHRAEESILVSALSACTHLGSPNLGRCIHGILLRNISELNVVVKTSLIDMYVKCGSLEKGLCVFQNMAHKNRYSYTVMIAGLAIHGRGREALRVFSDMLEEGLTPDDVVYVGVLSACSHAGLVKEGFQCFNRMQFEHMIKPTIQHYGCMVDLMGRAGMLKEAYDLIKSMPIK…	ATGAGTGGGACATCTGTCCTTTGCCAATCCCATCTTTTGTCACTGCCAAATAGTCCACTCCAAAGCTCTGAATTGAATGCAAAGTTCAATGAGCAGGGATGGTTGTCTTTGCTCAAGAGATGCAAGAGCATGGAAGAATTCAAGAAAGTACATGCCCATATTCTAAAATTGGGTCTCTTCTATGATTCTTTCTGTGGCAGCAATCTTGTTGCCTCTTGTGCTCTATCTAGATGGGGCAGCATGGAGTATGCTTGCTCAATCTTCAGGCAGATTGAGGAACCTGGTAGCTTTGAGTACAATACCATGATTAGAGGAAATGTCAATAGCATGGATCTAGAAGAAGCTTTGTTGCTTTATGTTGAGATGCTTGAAAGAGGAATTGAACCTGACAACTTCACC…
Chr01	GmHk_01G000111.1	1137867	1139742	-	Dagla_0	Sn1-specific diacylglycerol lipase alpha	GO:0006629	IPR029058	PF01764			Lipase (class 3)	S	MWKIIGHSLGGGTAALLTFMLREMKQFSSCTCVMCSDMANPSSQLYFFAAACMTLELAGFGKPFITSIINGYDIVPTLSASSLHDFIYKVLAQTTSPSLIKMGRIKDKNILTAVGSRLSFAKAITGHAVTRCTQVVKKHQQRTQSLLPCSQRENIETSDDLVKASQSWETSCETLLTEEHVIIESVSDDEEYNSSSEGSDGDDDDSDDDKDKLSNIHAKDKEATTTKNITEEESVCPVPTSVNLDRHPLYPPGKIMHIVPENNNSNRKYPDKKRIYLYETPTQFYGKLRFSRGIILDHLTKKYLKKLQQLINRLEKEQSKFGGL	ATGTGGAAGATCATTGGGCATTCACTTGGTGGTGGTACTGCTGCACTGTTGACATTTATGCTTAGAGAAATGAAGCAGTTCTCTTCATGTACTTGTGTCATGTGTTCTGATATGGCCAATCCTTCTTCACAACTGTATTTTTTTGCAGCTGCGTGTATGACATTGGAGTTAGCCGGATTCGGGAAGCCCTTTATCACTTCCATTATAAATGGTTATGACATAGTGCCTACATTGTCAGCTTCTTCTCTTCACGATTTCATTTACAAGGTGCTTGCTCAAACTACTTCTCCCAGCCTAATTAAGATGGGTCGGATTAAGGATAAAAACATCCTAACTGCAGTTGGATCTCGCTTATCATTTGCGAAAGCCATCACAGGACATGCAGTAACTCGTTGCACC…
Chr01	GmHk_01G000112.1	1143576	1148904	-	-	hypothetical protein	GO:0005515	IPR020683;IPR026961;IPR036770	PF12796;PF13962	cd00204		Ankyrin Repeat	S	MINKDVKAIFSTSSTGRTVLHVAVIAGYENIVRNLVKIGKEKLVKMQDNYDYTALALAAEYTGNVNMAKCMVDQKKGGKDLLLIKTKGGEIPVLLSAAKGYKDMTRYLYSQTQLEAFIDKNSHIGVLLLARCITAEIFDVALSLIHRIPKLPLTHESDGQRPLYALAHMPCAFPSGSGFGRLQQLLYDILRLERVELQNLCRITIHNCGKTIRIVPDVTDQVEGLHVAQEEGQQNNSFVGRFCDMALNFPPVKLLGRLLIFLYLLFQNYILLKFSSGISEIYEQKKTHRLVLEILNCLCQRISEYKESQLREASAYDAMLQAAKLGIIEFIDEMRKTTPDLLWAIDKNKRGIFAHAILNRRKDVFRLLNRVNGRKEIIRCSADVFGNTLLHLAGYLGPS…	ATGATCAATAAAGATGTCAAGGCCATATTTTCCACCTCCTCTACGGGGAGGACCGTTCTTCACGTTGCAGTGATTGCTGGGTACGAAAACATTGTGAGGAATTTGGTGAAGATAGGGAAAGAGAAACTAGTTAAAATGCAAGACAACTATGATTACACTGCCCTTGCTCTCGCTGCTGAATATACCGGAAACGTGAACATGGCAAAGTGCATGGTGGATCAGAAGAAGGGAGGGAAGGATCTGCTACTGATAAAGACAAAAGGTGGTGAAATCCCTGTTCTTCTTTCTGCTGCTAAGGGCTACAAAGACATGACTCGCTATCTTTACTCTCAGACTCAGCTTGAAGCGTTCATCGACAAAAATTCCCACATTGGGGTTTTGCTTCTTGCACGATGCATC…
Chr01	GmHk_01G000113.1	1160230	1164081	+	RGA4_0	Putative disease resistance protein RGA4	GO:0005515;GO:0043531	IPR002182;IPR027417;IPR032675	PF00931;PF13855			leucine Rich Repeat	S	MAQPERKSMDAAILVDSISDILKCSLAPPATRLSAKDLQQFQNHLEGIRDMVQKANNNINSQDSYVLAWLLEVKEVVNDLEDLIEVLRHKESATANATRSLIKASQNMAHRLKVTHHVKKASEELKRFLTEAQNLSFSKEARNIERKLLDTVAKFENTLVAVGRENVKKEIINQLKQFVNSGGDGVVPVVTIVGVPGIGKTKLARLVCEDEQVKAHFGEQIWVHGNRETLDVESIATPVAGTVKKGNRFLLVLDDLRDENVEECLHKLRKRLTEAVGAILITTRSNFVANYKIPGTVKLYALRGLNQEESWSLFQQIREQGSSNHINESVEREKVKEYCGGGVPMKIITIARLLNCSESPLSEAVLKEEFLQELKFTYYHQLPMHQKLCYVYCSLFPQD…	ATGGCACAACCAGAGCGCAAATCAATGGATGCAGCTATTCTTGTGGATTCCATATCTGACATCTTAAAATGCTCACTGGCACCACCAGCAACACGCCTCTCGGCAAAGGACCTTCAACAGTTTCAAAACCATCTCGAAGGGATCCGTGACATGGTTCAAAAGGCGAACAACAACATTAACTCCCAAGATTCCTATGTTCTTGCTTGGTTACTCGAGGTCAAGGAAGTGGTCAACGATTTGGAGGATTTGATTGAGGTTCTACGTCACAAGGAGAGTGCCACTGCCAATGCCACAAGATCTCTCATCAAAGCCAGCCAAAACATGGCGCATCGCCTCAAAGTCACGCACCATGTCAAGAAAGCCTCTGAGGAGCTCAAACGCTTCTTAACCGAGGCACAA…
Chr01	GmHk_01G000114.1	1165461	1186352	-	DAGLA_2	Craniofacial development protein 2	GO:0006629	IPR029058;IPR036691	PF01764	cd00519;cd09076		triglyceride lipase activity	S	MILSRVLRGAAGKLEKRPAEAPQSLMDIVLTLAEAIRFGYAETLGTWHLFDLPRAILYTIMDKGKKTIPMECGERSDCVQLKDPKILDELYEIRKCLTRTMLFSKKRFRAFLLAAGIPKEDVLLRKKRARILKPAFTVIRDKESKCLLVFIRGTQSLKDTLTDAIGAPVSFNHFICSDDGELKRNNKVSGHGHRGMVAAARWIKKHCTTILLEDLRRHPDFQIKIVGHSLGGGTAVLLTYMLREIKQFSSCTSASVSLELAEFGKPFITSIINDSDIVPTLSAYSIHDFIFEGQIKHKKILNAARSAVVSRLPFASTAKAIADHAVTRGTQVVKKHKERTRLLLSLSQQPENVGALSSSKSDNLAEASRSTETSYEVSEEIIISESTSDEDESIFSSDD…	ATGATATTGTCGAGAGTGCTTAGAGGGGCTGCCGGGAAGCTTGAAAAGAGGCCAGCTGAGGCACCCCAAAGTCTCATGGACATAGTGCTCACCTTAGCAGAAGCCATCAGGTTCGGTTATGCTGAGACACTGGGCACATGGCACCTCTTCGACTTGCCCAGAGCCATCCTTTACACTATCATGGACAAGGGTAAGAAAACAATTCCAATGGAATGTGGGGAAAGAAGTGATTGTGTACAACTGAAGGACCCCAAAATACTAGACGAGTTATATGAGATAAGAAAATGCTTGACACGGACCATGCTTTTCAGCAAAAAACGGTTTCGTGCGTTTTTACTGGCTGCTGGAATCCCCAAAGAGGATGTTCTCCTACGGAAGAAAAGAGCTAGGATTCTAAAG…
Chr01	GmHk_01G000114.2	1165461	1186352	-	DAGLA_2	Craniofacial development protein 2	GO:0006629	IPR029058;IPR036691	PF01764	cd00519;cd09076		triglyceride lipase activity	S	MILSRVLRGAAGKLEKRPAEAPQSLMDIVLTLAEAIRFGYAETLGTWHLFDLPRAILYTIMDKGKKTIPMECGERSDCVQLKDPKILDELYEIRKCLTRTMLFSKKRFRAFLLAAGIPKEDVLLRKKRARILKPAFTVIRDKESKCLLVFIRGTQSLKDTLTDAIGAPVSFNHFICSDDGELKRNNKVSGHGHRGMVAAARWIKKHCTTILLEDLRRHPDFQIKIVGHSLGGGTAVLLTYMLREIKQFSSCTSASVSLELAEFGKPFITSIINDSDIVPTLSAYSIHDFIFEGQIKHKKILNAARSAVVSRLPFASTAKAIADHAVTRGTQVVKKHKERTRLLLSLSQQPENVGALSSSKSDNLAEASRSTETSYEVSEEIIISESTSDEDESIFSSDD…	ATGATATTGTCGAGAGTGCTTAGAGGGGCTGCCGGGAAGCTTGAAAAGAGGCCAGCTGAGGCACCCCAAAGTCTCATGGACATAGTGCTCACCTTAGCAGAAGCCATCAGGTTCGGTTATGCTGAGACACTGGGCACATGGCACCTCTTCGACTTGCCCAGAGCCATCCTTTACACTATCATGGACAAGGGTAAGAAAACAATTCCAATGGAATGTGGGGAAAGAAGTGATTGTGTACAACTGAAGGACCCCAAAATACTAGACGAGTTATATGAGATAAGAAAATGCTTGACACGGACCATGCTTTTCAGCAAAAAACGGTTTCGTGCGTTTTTACTGGCTGCTGGAATCCCCAAAGAGGATGTTCTCCTACGGAAGAAAAGAGCTAGGATTCTAAAG…
Chr01	GmHk_01G000114.3	1165461	1179043	-	DAGLA_2	Sn1-specific diacylglycerol lipase alpha	GO:0006629	IPR029058	PF01764	cd00519		Lipase (class 3)	S	MAEAAGKLEKRPAEAPKTLMDTVLTLAEAIRFGYAETLGKWHLLDLPRAILYSVMDKGKKTVAVECAERSDCVQLKDPELLKELYELKKCLTQTMLFSKKRFRAFLFAAGFVKEDVLLRKRRARILKPAFTVILNKESKCLLVFIRGTRSIKDTLTDAIGAPVSFSHFICSDGELKKRDTVSGHGHRGMVAAARWIKKHCTTILLDALRQYPDFQIKIVGHSLGGGTAALLTFMLRETKQFASCTCVTFGPAACMSFELAEFGKPFITSIINGYDIVPTLSGSSVHDFVAEGKIKRKKILNAARSSITAIGSRLPFASTAKAIADHAVTRGTQVVMKNKQKTRSLLPWSRREKTEALPSSKSDNLAEACGSSETSCGVVEEIKISDSTSDEYDESKSSS…	ATGGCGGAAGCCGCCGGAAAGCTTGAAAAGAGGCCAGCCGAGGCGCCCAAAACATTGATGGACACAGTTCTTACGTTAGCAGAAGCCATAAGGTTCGGTTACGCCGAGACACTGGGCAAATGGCACCTCTTGGACTTGCCAAGAGCCATCCTTTACTCTGTCATGGACAAGGGTAAGAAAACAGTTGCAGTTGAATGCGCTGAAAGAAGTGACTGTGTACAACTGAAAGACCCCGAATTATTAAAGGAGTTATATGAGCTCAAAAAATGCTTGACACAGACCATGCTTTTCAGCAAAAAACGTTTTCGTGCCTTTTTATTTGCTGCTGGATTTGTCAAGGAGGATGTCCTCCTAAGGAAGAGAAGAGCTCGGATTCTGAAGCCCGCTTTCACAGTTATA…
Chr01	GmHk_01G000115.1	1195234	1197901	-	AE7_0	Protein AE7		IPR002744;IPR034904	PF01883			Family with sequence similarity 96, member	S	MVTGYPFSDCFYLYQPPGSIFHFSVKLQLLAKMVTELINANPIIYEKKERRAPSAPSAPHDEYAVEPIDQQEDPEHPYSLEELKVITEEAVEVDDQRNYVRVTFTPTVEHCSMATVIGLCLRVKLMRSLPSRYKVDIRVAPGSHATEAAVNKQLNDKERVAAALENPNLLNMVDDCLASSYD	ATGGTAACTGGTTATCCTTTCAGTGATTGTTTTTATCTGTATCAACCCCCTGGCAGTATTTTTCATTTTTCAGTTAAGTTGCAACTCTTGGCCAAAATGGTAACTGAGTTAATCAATGCGAACCCTATCATATATGAAAAGAAAGAGCGTCGAGCTCCATCTGCTCCATCTGCTCCCCATGATGAGTATGCTGTCGAACCAATCGACCAACAAGAGGACCCTGAGCATCCATATTCCTTGGAAGAGCTTAAGGTGATTACTGAGGAAGCAGTTGAAGTTGATGATCAGCGTAACTATGTGAGGGTTACATTTACTCCAACAGTGGAACATTGCAGTATGGCAACGGTTATAGGTCTATGCTTACGTGTCAAGCTCATGAGAAGCTTGCCTTCACGATAC…
Chr01	GmHk_01G000116.1	1200531	1203903	+	At3g17800_1	UV-B-induced protein At3g17800, chloroplastic		IPR008479	PF05542			Protein of unknown function (DUF760)	S	MLVSGAISDVLVVLPPSASLRLPEFRHLHAFTVSDAKGFLSGGFLKSCPSSYNPKHYNELYNFRARGLVARASADPRDNLVPFAPLQFESPVGQLLEQISNTHPHLLPAAIDQQLENLQTARDAQNESSDSSLDSLYKRIAEVKEKEKRTTLEEILYCSIVHKFLENNISMIPKISATSDPTGRVDLWPNQELKLEGVHSPEAFEMIQSHLSLVLGDRLVGPLQTVVQISKIKLGKLYAASIMYGYFLKRIDERFQLERSMGTLPKDFGKAKSFDEPSPGIKLWDPDSLIIVHDYDNDSDHMDTDEGRSFRLRAYVMQLDAETLQRLATVRSKEAISLIEKQTQALFGRPDIRVSEDGSIETSNDELLSLTFSGLTMLVLEALAFGSFLWDKENYVESK…	ATGCTGGTTTCGGGTGCTATTAGCGACGTTTTGGTGGTGCTTCCACCTTCGGCATCTCTCAGACTTCCGGAATTTCGCCATTTGCATGCTTTCACAGTTTCTGACGCCAAGGGTTTTCTGTCTGGGGGATTTCTTAAAAGCTGTCCTTCATCTTACAATCCCAAGCACTACAATGAACTCTACAATTTCCGAGCTAGAGGCTTAGTTGCAAGAGCATCTGCTGATCCAAGGGATAATTTGGTGCCATTTGCTCCCCTCCAATTTGAGTCACCAGTTGGTCAGCTTTTGGAACAAATCTCAAATACCCATCCGCATCTACTACCAGCAGCCATTGATCAACAACTAGAGAATCTTCAGACTGCTAGAGATGCTCAGAATGAATCTTCTGATTCATCTCTT…
Chr01	GmHk_01G000116.2	1200531	1203903	+	At3g17800_1	UV-B-induced protein At3g17800, chloroplastic		IPR008479	PF05542			Protein of unknown function (DUF760)	S	MLVSGAISDVLVVLPPSASLRLPEFRHLHAFTVSDAKGFLSGGFLKSCPSSYNPKHYNELYNFRARGLVARASADPRDNLVPFAPLQFESPVGQLLEQISNTHPHLLPAAIDQQLENLQTARDAQNESSDSSLDSLYKRIAEVKEKEKRTTLEEILYCSIVHKFLENNISMIPKISATSDPTGRVDLWPNQELKLEGVHSPEAFEMIQSHLSLVLGDRLVGPLQTVVQISKIKLGKLYAASIMYGYFLKRIDERFQLERSMGTLPKDFGKAKSFDEPSPGIKLWDPDSLIIVHDYDNDSDHMDTDEGRSFRLRAYVMQLDAETLQRLATVRSKEAISLIEKQTQALFGRPDIRVSEDGSIETSNDELLSLTFSGLTMLVLEALAFGSFLWDKENYVESK…	ATGCTGGTTTCGGGTGCTATTAGCGACGTTTTGGTGGTGCTTCCACCTTCGGCATCTCTCAGACTTCCGGAATTTCGCCATTTGCATGCTTTCACAGTTTCTGACGCCAAGGGTTTTCTGTCTGGGGGATTTCTTAAAAGCTGTCCTTCATCTTACAATCCCAAGCACTACAATGAACTCTACAATTTCCGAGCTAGAGGCTTAGTTGCAAGAGCATCTGCTGATCCAAGGGATAATTTGGTGCCATTTGCTCCCCTCCAATTTGAGTCACCAGTTGGTCAGCTTTTGGAACAAATCTCAAATACCCATCCGCATCTACTACCAGCAGCCATTGATCAACAACTAGAGAATCTTCAGACTGCTAGAGATGCTCAGAATGAATCTTCTGATTCATCTCTT…
Chr01	GmHk_01G000117.1	1206540	1210540	+	IWS1_0	Protein IWS1 1	GO:0005634	IPR035441	PF08711			IWS1 homolog (S. cerevisiae)	S	MGYEDNPYRDEDGEPLMDYDDIQSDREPSPEPRRQDDDFDEDVDEWRGRDRSQTPVYDTDPSRSKPRKRLIKKSDAGKQAVEPELEDEDVEGYVPEAMFDEADTGRKRKKGKEGGSGKKEKRMKGEKSFGSSGGKSGSKFGSGKKGFGGKAGKDHDGEVKEMWDTIAGGDSEDDQEGVRNVDDDNFIDDTGVEPAYYGSDEPRSPVDAPQAEEGEEDEEIKDLFKIGKKKKKNERSPAEIAYLVETVMAELEVTAEEDAELNRQGKPAINKLKKLNLLTEVLSKKQLQLEFLDHGVLTLLKNWLEPLPDGSLPNINIRSEVLKILNDFPIDLEQYDRREQLKKSGLGKVIMFLSKSDEEISANRKLAKELVDKWSRPIFNKSTRFEDMRNVEDDRVPYR…	ATGGGCTACGAAGACAATCCGTATCGTGACGAGGACGGAGAGCCCTTGATGGACTACGACGACATTCAATCCGATCGCGAGCCATCTCCCGAGCCTCGCCGCCAGGACGACGATTTCGATGAGGACGTCGACGAGTGGCGCGGCCGTGATCGGTCGCAGACGCCGGTCTATGACACCGATCCGTCGCGGTCGAAGCCGCGGAAGAGGCTGATCAAGAAGAGCGACGCCGGGAAGCAGGCGGTGGAGCCGGAGCTTGAGGATGAGGACGTGGAGGGGTATGTTCCGGAGGCGATGTTCGACGAGGCGGACACTGGAAGGAAGAGGAAGAAGGGGAAGGAGGGTGGGAGTGGGAAGAAGGAGAAGAGGATGAAGGGGGAGAAGAGTTTTGGGAGCAGCGGT…
Chr01	GmHk_01G000118.1	1214255	1215061	+	KIN12A_1	Kinesin-like protein KIN-12A	GO:0003777;GO:0005524;GO:0007018;GO:0008017	IPR027417;IPR036961	PF00225			Kinesin family member	Z	MLLNFMMSMQLNLLDCGKTYTMWGPANCLSHENDQQGLAPRVFQQLFARISEEQTKHSENQLSYQCHCSFLEIYNEPIMDLLDPNQKNLQEWSKELILLGHMVPVMWSQLISRGRCPRNSDITI	ATGTTGTTGAATTTCATGATGTCTATGCAATTAAACTTACTAGATTGTGGGAAGACTTATACAATGTGGGGTCCTGCCAATTGTTTATCGCATGAAAATGATCAACAAGGACTTGCCCCCCGTGTTTTTCAGCAACTCTTTGCACGCATAAGTGAAGAGCAAACTAAGCATTCTGAAAACCAACTCAGCTATCAGTGCCACTGCTCTTTTCTTGAGATATACAATGAGCCAATCATGGATTTGTTGGATCCAAATCAGAAAAACCTACAGGAATGGAGCAAGGAACTTATCCTCCTTGGGCACATGGTCCCGGTTATGTGGTCTCAGTTGATATCACGAGGACGATGTCCAAGAAATTCAGACATAACCATTTGA
Chr01	GmHk_01G000118.2	1213475	1213929	+	KIN12A_1	hypothetical protein						Kinesin family member	Z	MKRFMLPRNPLSDAAELPSSPSPTPTTSFAKLRPSSHKHKPSKENDLPSDPNLVTPSPAKLKSPLPPRPPSSNPLKRKLTIVDALTDNSLRFRHQGYCQDEAIVFGQGRRRSHSSEGFQ	ATGAAGCGCTTCATGCTCCCAAGAAACCCTCTCAGCGACGCAGCAGAGCTTCCTTCTTCGCCAAGCCCAACCCCAACTACCAGCTTTGCCAAACTCCGTCCCTCTTCTCACAAACACAAACCCTCCAAAGAGAACGACCTTCCCTCCGATCCCAATCTCGTTACTCCCTCCCCTGCCAAATTGAAGAGCCCCTTGCCCCCAAGACCCCCTTCTTCCAACCCTCTCAAGCGCAAGCTCACCATCGTTGATGCCCTAACCGACAATTCTCTTCGATTTCGGCATCAAGGTTATTGTCAGGATGAGGCCATTGTCTTCGGACAAGGACGAAGGAGATCCCACAGTTCAGAAGGTTTTCAATGA
Chr01	GmHk_01G000118.3	1213475	1213929	+	KIN12A_1	hypothetical protein						Kinesin family member	Z	MKRFMLPRNPLSDAAELPSSPSPTPTTSFAKLRPSSHKHKPSKENDLPSDPNLVTPSPAKLKSPLPPRPPSSNPLKRKLTIVDALTDNSLRFRHQGYCQDEAIVFGQGRRRSHSSEGFQ	ATGAAGCGCTTCATGCTCCCAAGAAACCCTCTCAGCGACGCAGCAGAGCTTCCTTCTTCGCCAAGCCCAACCCCAACTACCAGCTTTGCCAAACTCCGTCCCTCTTCTCACAAACACAAACCCTCCAAAGAGAACGACCTTCCCTCCGATCCCAATCTCGTTACTCCCTCCCCTGCCAAATTGAAGAGCCCCTTGCCCCCAAGACCCCCTTCTTCCAACCCTCTCAAGCGCAAGCTCACCATCGTTGATGCCCTAACCGACAATTCTCTTCGATTTCGGCATCAAGGTTATTGTCAGGATGAGGCCATTGTCTTCGGACAAGGACGAAGGAGATCCCACAGTTCAGAAGGTTTTCAATGA
Chr01	GmHk_01G000118.4	1213475	1213929	+	KIN12A_1	hypothetical protein						Kinesin family member	Z	MKRFMLPRNPLSDAAELPSSPSPTPTTSFAKLRPSSHKHKPSKENDLPSDPNLVTPSPAKLKSPLPPRPPSSNPLKRKLTIVDALTDNSLRFRHQGYCQDEAIVFGQGRRRSHSSEGFQ	ATGAAGCGCTTCATGCTCCCAAGAAACCCTCTCAGCGACGCAGCAGAGCTTCCTTCTTCGCCAAGCCCAACCCCAACTACCAGCTTTGCCAAACTCCGTCCCTCTTCTCACAAACACAAACCCTCCAAAGAGAACGACCTTCCCTCCGATCCCAATCTCGTTACTCCCTCCCCTGCCAAATTGAAGAGCCCCTTGCCCCCAAGACCCCCTTCTTCCAACCCTCTCAAGCGCAAGCTCACCATCGTTGATGCCCTAACCGACAATTCTCTTCGATTTCGGCATCAAGGTTATTGTCAGGATGAGGCCATTGTCTTCGGACAAGGACGAAGGAGATCCCACAGTTCAGAAGGTTTTCAATGA
Chr01	GmHk_01G000118.5	1214255	1215061	+	KIN12A_1	Kinesin-like protein KIN-12A	GO:0003777;GO:0005524;GO:0007018;GO:0008017	IPR027417	PF00225			Kinesin family member	Z	MLLNFMMSMQLNLLDCGKTYTMWGPANCLSHENDQQGLAPRVFQQLFARISEEQTKHSENQLSYQCHCSFLEVDCLLIVSFCVPDLLNNFSLVLLAQSLFLQIYNEPIMDLLDPNQKNLQEWSKELILLGHMVPVMWSQLISRGRCPRNSDITI	ATGTTGTTGAATTTCATGATGTCTATGCAATTAAACTTACTAGATTGTGGGAAGACTTATACAATGTGGGGTCCTGCCAATTGTTTATCGCATGAAAATGATCAACAAGGACTTGCCCCCCGTGTTTTTCAGCAACTCTTTGCACGCATAAGTGAAGAGCAAACTAAGCATTCTGAAAACCAACTCAGCTATCAGTGCCACTGCTCTTTTCTTGAGGTTGATTGTCTCTTAATTGTTTCTTTTTGTGTTCCTGACCTACTTAACAATTTTAGTTTAGTCCTTTTGGCACAAAGTTTGTTTTTGCAGATATACAATGAGCCAATCATGGATTTGTTGGATCCAAATCAGAAAAACCTACAGGAATGGAGCAAGGAACTTATCCTCCTTGGGCACATGGTC…
Chr01	GmHk_01G000119.1	1222675	1225245	+	DAGLA_1	Sn1-specific diacylglycerol lipase alpha	GO:0006629	IPR029058	PF01764	cd00519		Lipase (class 3)	S	MEVKNEKKAPSVERRHIEAPKNLMDVVSILMEAIKSLGYKEKWHILNLPRAIASAVLDTGKKTVARECGERSDCVQLKAPEVIKELYEIKKLLTRTLLFSRKRFHGFLFAAGIDKEDVLLRKRTAGIVRPAFTVIRDIESKSVLVFIRGTRSLKDTLTDALCKPVSFEHRRNNNIVSGHAHHGMVSAASWILHRCTPVLKEALDQYPHFKIKIVGHSLGGGTAALLTFKLREIQEFSSSTCVTFGPGM	ATGGAGGTGAAGAATGAAAAGAAAGCCCCGAGTGTTGAACGGAGGCATATTGAGGCGCCCAAAAATTTGATGGATGTAGTGTCCATATTAATGGAAGCCATAAAGTCGCTCGGTTACAAGGAGAAATGGCACATCCTCAACTTGCCCAGAGCCATTGCTTCCGCTGTGTTGGACACGGGTAAGAAAACAGTTGCAAGAGAATGCGGTGAAAGAAGTGATTGTGTACAGCTGAAGGCCCCCGAAGTCATAAAGGAGTTATATGAGATAAAGAAATTGTTGACACGGACCTTGCTTTTCAGCAGAAAACGGTTTCATGGGTTCTTATTTGCTGCTGGAATCGACAAGGAGGATGTCCTCCTAAGAAAGAGAACAGCTGGGATTGTAAGGCCAGCTTTCACG…
Chr01	GmHk_01G000120.1	1229633	1234846	+	-	hypothetical protein		IPR026961	PF13962			Ankyrin Repeat	S	MKRVFCEDSNSPRQTKFQRIPPGDGKKPRELFSESHLEMVKAGEKWAKDTAGSFTLVGTLITTIMFAAAFTVPGGNHQETGAPIFLHDHIFTLFIIADAISLFTSSTSVLIFIGILTSRYAEKDFLKTLPLKLLCGLVTLFLSVVAMMVAFCASLAMMLKGYQRLIIAAMSLASIPVIVLVPSQLRLFLEIFNSTMNATYIK	ATGAAAAGGGTTTTCTGTGAGGACTCTAATTCTCCCAGACAGACCAAGTTCCAAAGGATTCCACCTGGAGATGGTAAGAAGCCCCGCGAGCTGTTCAGTGAAAGCCACCTGGAGATGGTGAAAGCTGGTGAGAAATGGGCAAAAGACACAGCTGGTTCTTTCACTCTTGTGGGTACTCTCATCACTACCATCATGTTCGCTGCGGCTTTCACTGTCCCCGGTGGAAACCATCAAGAAACTGGAGCACCCATCTTCTTACACGATCACATATTCACTTTGTTTATCATAGCAGATGCAATATCTCTCTTTACTTCTTCCACTTCAGTTCTGATCTTCATTGGGATCCTCACGTCGCGTTATGCTGAGAAGGATTTCCTCAAGACACTGCCGTTGAAGTTA…
Chr01	GmHk_01G000121.1	1234998	1237464	+	IWS1_1	Protein IWS1 1						IWS1 homolog (S. cerevisiae)	S	MVRSYTVYTRGKPFNSRKNRTINATTYMQYVQKCKGSRIQPRSGQSSSRQHASRPEATPLDFVVRPQSKIDPEEIRARAKQAAQDQQRMKVDVTNLTFVNCPLQMNKKLQQLRAPKKKQLQATKLSVEGRGGDPVSSINGNLKERDVMKIHPYTAFVYSFSAAGNPKYI	ATGGTGAGATCATACACAGTCTACACACGTGGTAAGCCCTTTAATTCGCGCAAAAACAGGACAATTAATGCAACTACATATATGCAATATGTGCAAAAATGTAAAGGTTCCAGAATCCAGCCTAGGTCTGGACAGTCCTCTTCTAGGCAGCATGCATCAAGGCCGGAAGCAACACCTTTGGATTTTGTGGTCCGTCCCCAGTCTAAAATTGATCCAGAAGAAATTAGAGCACGAGCAAAACAAGCTGCACAAGATCAGCAGCGTATGAAGGTTGATGTGACCAATTTGACCTTTGTGAACTGTCCACTGCAGATGAATAAGAAATTGCAGCAATTGAGGGCACCAAAAAAGAAGCAGCTTCAGGCTACAAAACTGAGCGTGGAAGGTCGTGGTGGAGAT…
Chr01	GmHk_01G000122.1	1240033	1243281	-	RGA4_1	Putative disease resistance protein RGA4	GO:0005515;GO:0043531	IPR002182;IPR003591;IPR027417;IPR032675;IPR041118	PF00931;PF13855;PF18052			leucine Rich Repeat	S	MDVTILADAISDILGRTGSSLALPKENVKEFEDVLRKINDVVHKAKQNNSLDPNVLLWLKEVKDKVNDLNDLMDDLPHKQGNAAIISLIKTGQSMVHRHKVTQQLKKATGLLKSFATEGEKLSFTQEAKKNERKLKDISGDKFVAVGRENAKKEIVDQLKLFVKNSGNGAVSFPVVTIVGVAGIGKTKLARLVCEDEEVKALFGSPTWVQGNHETFDVESVATCVTKIVDQGNRFLLVVDGLKDEESLQKLQRKLACVSGVVLVTTRNNFVANNIAVSGAVKPYALQGLNQDESWLLFQQIRGQGSSNIKEDVERQIVWEYCGGVPMKIATAAKLIKCSESSFFRDKLEEEFLQELKFTYYHQLSMHQKLCFVYCSLFPQDHVIEAEKLIHLWMAEGFL…	ATGGACGTAACTATTCTTGCCGATGCCATATCCGACATCCTAGGACGCACTGGCTCCTCCCTTGCACTCCCAAAGGAGAATGTTAAAGAGTTTGAAGATGTTCTCAGAAAGATCAATGACGTGGTTCACAAGGCCAAGCAGAACAACTCCCTAGACCCCAATGTTCTGCTTTGGTTGAAAGAGGTCAAGGACAAGGTCAACGACTTGAACGATTTGATGGATGATCTCCCTCACAAGCAGGGAAACGCTGCCATAATATCGCTCATCAAAACTGGCCAAAGCATGGTGCATCGTCACAAAGTCACACAACAACTCAAGAAAGCTACTGGGCTGCTCAAAAGCTTCGCAACGGAGGGAGAAAAATTGTCCTTCACCCAAGAAGCAAAGAAGAACGAGAGA…
Chr01	GmHk_01G000123.1	1251663	1255892	-	Dagla_1	Sn1-specific diacylglycerol lipase alpha	GO:0006629	IPR029058	PF01764	cd00519		triglyceride lipase activity	S	MITSIVVRKAAGKLEKRPAEAPKTLMDTVLTLAEAIRFGYAETLGKWHLFDLPRAILYSIMDKRKKTVTIECSERSDCVQLTDPEILKELYELKRCLTLTMLFSKKRFRTFLFAAQFAKDDVLLRKKKARILKPAFTVIRDKKSKCLFVFIRGTRSIKDTLTDAIGAPVSFNHYICSDGELKRKNEVAGHAHRGMVAAAGWIKKHCTPILLDALRRYPDFEIKIVGHSLGGGTAALLTYMLREIKQFSSCTCVTFGPAACMTLGLAEFGKPFITSIINGFDMVPTLSACSVHDFISEGLIKRKKILNAARNAVVSRLPFASTAKAIAARGSQVVMKNKQRTRSLLPWSRRKNTEALASSKSENLAEACRSIETSCEFEVAEETSDEDDGSKSSSEESDD…	ATGATAACGTCGATAGTGGTTAGGAAGGCCGCCGGAAAGCTTGAAAAGAGGCCAGCCGAGGCGCCCAAAACATTGATGGACACAGTGCTTACGTTAGCAGAAGCCATAAGGTTCGGTTACGCCGAGACACTGGGCAAATGGCACCTCTTTGATTTGCCAAGAGCTATCCTTTACTCTATCATGGACAAGCGTAAGAAAACAGTTACAATCGAATGTAGCGAAAGAAGTGATTGTGTGCAACTCACAGACCCCGAAATATTAAAGGAGTTGTATGAGCTGAAAAGATGCTTGACACTGACCATGCTTTTCAGCAAAAAACGGTTTCGTACGTTTTTATTCGCTGCTCAATTCGCCAAGGACGATGTCCTCCTAAGGAAGAAAAAAGCTCGGATTCTAAAG…
Chr01	GmHk_01G000123.2	1251663	1255892	-	Dagla_1	hypothetical protein		IPR029058				triglyceride lipase activity	S	MITSIVVRKAAGKLEKRPAEAPKTLMDTVLTLAEAIRFGYAETLGKWHLFDLPRAILYSIMDKRKKTVTIECSERSDCVQLTDPEILKELYELKRCLTLTMLFSKKRFRTFLFAAQFAKDDVLLRKKKARILKPAFTVIRDKKSKCLFVFIRGTRSIKDTLTDAIGAPVSFNHYICSDGELKRKNEVAGHAHRGMVAAAGWIKKHCTPILLDALRRYPDFEIKGLIKRKKILNAARNAVVSRLPFASTAKAIAARGSQVVMKNKQRTRSLLPWSRRKNTEALASSKSENLAEACRSIETSCEFEVAEETSDEDDGSKSSSEESDDDEEEQILSATQNITNQNISEDELLNQVKGLELETEDDIPNTHAQEKEATTTKDFTTLNISEDDIPNIHAQEKEA…	ATGATAACGTCGATAGTGGTTAGGAAGGCCGCCGGAAAGCTTGAAAAGAGGCCAGCCGAGGCGCCCAAAACATTGATGGACACAGTGCTTACGTTAGCAGAAGCCATAAGGTTCGGTTACGCCGAGACACTGGGCAAATGGCACCTCTTTGATTTGCCAAGAGCTATCCTTTACTCTATCATGGACAAGCGTAAGAAAACAGTTACAATCGAATGTAGCGAAAGAAGTGATTGTGTGCAACTCACAGACCCCGAAATATTAAAGGAGTTGTATGAGCTGAAAAGATGCTTGACACTGACCATGCTTTTCAGCAAAAAACGGTTTCGTACGTTTTTATTCGCTGCTCAATTCGCCAAGGACGATGTCCTCCTAAGGAAGAAAAAAGCTCGGATTCTAAAG…
Chr01	GmHk_01G000124.1	1271638	1278122	+	ITN1_0	Ankyrin repeat-containing protein ITN1	GO:0005515	IPR020683;IPR025314;IPR026961;IPR036770	PF12796;PF13961;PF13962	cd00204		Ankyrin Repeat	S	MAATNLAARGIVLESLTRDNYDNWSALVKNYLMGEGLWGVVTSVSEISAKPKTDCENWKRENAKALHIIQLACGSEILNQIRHVETAKEAWNRLGALYSSQLKGDPDIEQGFVDDTLHEYKQLHRYVESGDWKNAKSIIYTDDTAIFSTSSTGRTVLHIAVIAGYENIVRELVKKGKEKLVKMQDNCDYTALALAAELTGNHKIAKCMVDPKKGGKDLLTMKTKDAEIPVLLSAAKGHKDMTRYLYSQTSLDQFRNKNSHNGLLLLTRCITAEIFDVALNLIHRIPQLPLIHESDDLRPLYALARMPSAFPSGCGFGRLQQFIYNILILEKQEQQKLCRIVPDIAQVECHAQAEASYVDLEELEKGQHNSNASFAGRLYGLILDLPPVKLLGGLLIFVY…	ATGGCAGCTACAAACCTTGCAGCCCGTGGAATAGTTCTGGAATCGCTTACAAGAGACAATTACGACAACTGGAGTGCTCTTGTGAAGAACTATCTAATGGGTGAAGGTCTGTGGGGCGTTGTCACGTCTGTTTCAGAAATTAGTGCGAAACCTAAAACTGATTGTGAGAATTGGAAGAGGGAAAATGCCAAGGCTTTGCATATCATTCAGCTAGCATGTGGTTCAGAGATTCTTAATCAGATTAGACATGTTGAAACAGCAAAAGAAGCTTGGAACAGATTGGGCGCGTTATACAGTTCACAATTAAAAGGCGATCCAGATATTGAGCAAGGTTTCGTGGACGATACTCTCCATGAATATAAACAGCTGCACAGATATGTGGAGAGTGGTGATTGGAAA…
Chr01	GmHk_01G000125.1	1279768	1280587	-	ITN1_1	Ankyrin repeat-containing protein ITN1		IPR026961	PF13962			Ankyrin Repeat	S	MPHRNNPAPLPLVVTLNCVEDCSLEFESLAGVATAVEEVVDPKCKEARNDDDKKPHELFTERHKELVKAGEKWAKETANSFTLVGTLITTIMFAAVFTVPGGNTQDTGVPIFLKEKIFTAFVVADAISLFTSATSVLICIWIVASRYAEQDFLRRLPYKLLLSIFYLFLSEVSMIFAFCAALGILLKNYWAYKRLFIGGVISGSIPVIILVPSQLTLMYKIFRSTISNPFRIRKKI	ATGCCTCACCGTAACAACCCTGCACCTCTCCCCCTCGTCGTGACCCTAAACTGCGTCGAGGACTGTTCCCTCGAATTCGAATCCCTAGCCGGCGTCGCCACCGCGGTGGAGGAAGTTGTGGATCCCAAGTGTAAGGAAGCCAGAAATGATGACGATAAGAAGCCTCATGAGCTATTCACTGAAAGGCACAAGGAGCTGGTGAAAGCTGGAGAGAAATGGGCAAAAGAAACCGCTAATTCTTTTACACTTGTGGGTACTCTCATCACTACTATCATGTTCGCTGCGGTCTTCACTGTCCCAGGTGGAAACACGCAAGATACTGGAGTGCCCATTTTCTTAAAGGAGAAGATATTTACTGCATTTGTGGTCGCAGATGCAATATCTCTCTTCACTTCTGCC…
Chr01	GmHk_01G000126.1	1288322	1296416	-	CRK29_0	Cysteine-rich receptor-like protein kinase 29	GO:0004672;GO:0005524;GO:0006468	IPR001245;IPR002902;IPR008271;IPR011009;IPR017441;IPR038408	PF01657;PF07714	cd14066		Serine Threonine protein kinase	T	MLPVIPRGQFIMSTISGMQLFFLCCLYLIIVICEASFGPSYEYSKYCNNSNGNYTANSIYQTNLNTLLSTLTSHTEIDYGFYNFSHGQNSDKVYAIGLCRGDVKPDECRSCLNNSRVSLTRLCPKQLEAINWEEKCMLRYSNRAIFHTMDASFSYHMNNVNNATDAEEFNKVLGELLRNLSDKAASGDPRRKYAADTAVFANLQTIYGLVQCTPDLSRQDCGKCLHWSLADFGNVFKNKVGAVVLRPSCNVRYEIYPFYDEPTPSASVPLSLKEKGNSLRTTIAIVVPTVLVVVALLIFISIYFRRRKLARKNLLADEDDDEIELAESLQFNFDTIKVATNNFSDSNKLGEGGFGAVYQGRLSNGQVIAVKRLSSDSGQGGVEFKNEVLLLAKLQHRNL…	ATGTTACCTGTCATTCCCAGAGGACAATTTATAATGTCTACTATTTCTGGTATGCAGCTTTTCTTTCTTTGTTGCTTGTATCTAATAATAGTAATATGTGAAGCCAGCTTCGGACCAAGTTATGAATACTCCAAATACTGTAATAACAGTAATGGAAACTACACAGCCAATAGCATCTACCAAACCAACCTCAATACCCTCTTATCCACCCTCACTTCCCACACAGAAATCGACTATGGTTTCTACAATTTCTCGCATGGCCAAAACTCAGACAAAGTATACGCAATAGGGTTATGCAGAGGAGATGTTAAGCCAGACGAATGTCGCAGCTGCCTCAACAATTCTAGAGTTAGTCTCACACGGTTGTGTCCAAAGCAGTTAGAGGCAATCAATTGGGAA…
Chr01	GmHk_01G000127.1	1305979	1315895	-	BZIP16_2	bZIP transcription factor 16	GO:0003700;GO:0006355	IPR012900	PF00170;PF07777;PF16596	cd14702		Transcription factor	K	MGISQTVQNGKENLTGQRHRTTIHGFLSLSLPFVCFLSSSADQVLFLLLLQLWRIHSFSLSGWFNVYFEDTDISMGSSEMDKTPKEKESKTPPPPPTSQEQSSTTSTGTINPEWPGFQAYSPIPPHGFLASNPQAHPYMWGVQEITGQATMDQARMVAGGNRGMGTGAVIFRWCVGIEQWLVSSQLQNIGGPAAIDNHEYDCTRERLLQLQKHMQQFMPPYGTPPHPYVAMYPPGGIYAHPSMPPGSYPFSPFAMPSPNGIAEASGNTPGSMEADGKPPEVKEKLPIKRSKGSLGSLNMITGKNNEHGKTPGTSANGIHSKSGESASEGEGTSEGSDANSQNDSQLKSGGRQDSFEDEPSQNGSLAYTAQNGGLNTPHTVVNQTMSIIPISAGGAPGAV…	ATGGGGATTTCACAAACTGTGCAAAATGGGAAGGAAAATCTCACTGGACAGCGACACCGTACGACGATTCATGGGTTCCTCTCCCTGTCGCTTCCTTTTGTTTGTTTTTTGTCATCCTCGGCAGATCAGGTTTTGTTTTTGCTTCTGCTCCAGCTTTGGAGGATCCACAGTTTCTCTCTGAGTGGGTGGTTTAATGTATATTTTGAAGATACTGATATAAGTATGGGCAGCAGTGAGATGGATAAAACTCCAAAAGAGAAGGAGTCAAAGACGCCGCCACCACCACCTACGTCACAGGAGCAGTCTTCGACCACCAGCACTGGAACAATTAATCCTGAGTGGCCTGGCTTTCAGGCATATTCTCCTATACCTCCACATGGTTTCTTGGCATCAAATCCC…
Chr01	GmHk_01G000127.2	1305979	1315895	-	BZIP16_2	bZIP transcription factor 16	GO:0003700;GO:0006355	IPR012900	PF00170;PF07777;PF16596	cd14702		Transcription factor	K	MGISQTVQNGKENLTGQRHRTTIHGFLSLSLPFVCFLSSSADQVLFLLLLQLWRIHSFSLSGWFNVYFEDTDISMGSSEMDKTPKEKESKTPPPPPTSQEQSSTTSTGTINPEWPGFQAYSPIPPHGFLASNPQAHPYMWGVQQQFMPPYGTPPHPYVAMYPPGGIYAHPSMPPGSYPFSPFAMPSPNGIAEASGNTPGSMEADGKPPEVKEKLPIKRSKGSLGSLNMITGKNNEHGKTPGTSANGIHSKSGESASEGEGTSEGSDANSQNDSQLKSGGRQDSFEDEPSQNGSLAYTAQNGGLNTPHTVVNQTMSIIPISAGGAPGAVPGPTTNLNIGMDYWGTPASSNIPALGRKVPSTAVAGGMVTVGSRDSAQSQLWLQDERELKRQRRKQSNRES…	ATGGGGATTTCACAAACTGTGCAAAATGGGAAGGAAAATCTCACTGGACAGCGACACCGTACGACGATTCATGGGTTCCTCTCCCTGTCGCTTCCTTTTGTTTGTTTTTTGTCATCCTCGGCAGATCAGGTTTTGTTTTTGCTTCTGCTCCAGCTTTGGAGGATCCACAGTTTCTCTCTGAGTGGGTGGTTTAATGTATATTTTGAAGATACTGATATAAGTATGGGCAGCAGTGAGATGGATAAAACTCCAAAAGAGAAGGAGTCAAAGACGCCGCCACCACCACCTACGTCACAGGAGCAGTCTTCGACCACCAGCACTGGAACAATTAATCCTGAGTGGCCTGGCTTTCAGGCATATTCTCCTATACCTCCACATGGTTTCTTGGCATCAAATCCC…
Chr01	GmHk_01G000127.3	1305979	1315895	-	BZIP16_2	bZIP transcription factor 16	GO:0003700;GO:0006355	IPR012900	PF00170;PF07777;PF16596	cd14702		Transcription factor	K	MGISQTVQNGKENLTGQRHRTTIHGFLSLSLPFVCFLSSSADQVLFLLLLQLWRIHSFSLSGWFNVYFEDTDISMGSSEMDKTPKEKESKTPPPPPTSQAYSPIPPHGFLASNPQAHPYMWGVQQQFMPPYGTPPHPYVAMYPPGGIYAHPSMPPGSYPFSPFAMPSPNGIAEASGNTPGSMEADGKPPEVKEKLPIKRSKGSLGSLNMITGKNNEHGKTPGTSANGIHSKSGESASEGEGTSEGSDANSQNDSQLKSGGRQDSFEDEPSQNGSLAYTAQNGGLNTPHTVVNQTMSIIPISAGGAPGAVPGPTTNLNIGMDYWGTPASSNIPALGRKVPSTAVAGGMVTVGSRDSAQSQLWLQDERELKRQRRKQSNRESARRSRLRKQAECDELAQRA…	ATGGGGATTTCACAAACTGTGCAAAATGGGAAGGAAAATCTCACTGGACAGCGACACCGTACGACGATTCATGGGTTCCTCTCCCTGTCGCTTCCTTTTGTTTGTTTTTTGTCATCCTCGGCAGATCAGGTTTTGTTTTTGCTTCTGCTCCAGCTTTGGAGGATCCACAGTTTCTCTCTGAGTGGGTGGTTTAATGTATATTTTGAAGATACTGATATAAGTATGGGCAGCAGTGAGATGGATAAAACTCCAAAAGAGAAGGAGTCAAAGACGCCGCCACCACCACCTACGTCACAGGCATATTCTCCTATACCTCCACATGGTTTCTTGGCATCAAATCCCCAGGCTCACCCTTATATGTGGGGTGTCCAGCAGCAATTTATGCCTCCCTATGGTACT…
Chr01	GmHk_01G000128.1	1317754	1319439	+	ATJ49_0	Chaperone protein dnaJ 49		IPR001623;IPR024593;IPR036869	PF00226;PF11926	cd06257		DNAJ heat shock N-terminal domain-containing protein	O	MAEAESEALRLKAMAESKFKASNNAKSALKYANRAHRLCPHLAGVPETVAALSVLAAPDWYRALGAEPFASSSVIRRQYKKLALLLHPDKNPHVASEEAFKLLGEAFRFLSDRNRRREYDAELRRKIEAAESESETFWTACSTCRLLHQFERRYLGQELVCPSCEKGFRAVEAVQSDDDGDVRVRSRRLKLKEMEKREIGVEGKVGNAKEGRLGKRMCSVGEVLERAKPSNSKRVKKNGEEMMTLAEFQSQVKRKLQGEKLKAKGNEKEKEKEDGIEKRRNRAERRQGLRNNGGLEVGEVRGLKKSVKPAIEEKRKGLRIEKHRGGSSGGDLEDMAVLDSDFYDFDKDRVEKSFKKGQVWAVYEDEDGMPRNYALIDETVSVNPFGVRISWLDVQNSGD…	ATGGCAGAAGCAGAATCCGAAGCGCTGCGCCTCAAGGCCATGGCGGAGTCCAAGTTCAAAGCCTCCAACAACGCCAAATCCGCTCTCAAGTACGCCAACCGCGCCCACCGCCTCTGCCCGCACCTCGCCGGCGTGCCGGAGACCGTCGCTGCCCTCTCCGTCCTCGCCGCGCCGGACTGGTACCGCGCCCTCGGCGCCGAGCCCTTCGCGAGCAGCAGCGTCATCCGGAGGCAGTACAAGAAGCTCGCGCTGCTCCTCCACCCCGACAAGAACCCCCACGTGGCCTCCGAGGAGGCCTTCAAGCTCCTCGGCGAGGCCTTCCGCTTTCTCTCCGACAGAAACCGCCGCCGCGAGTACGACGCCGAGCTTCGACGTAAAATCGAGGCGGCGGAGAGTGAG…
Chr01	GmHk_01G000129.1	1331402	1334443	+	XTH30_0	putative xyloglucan endotransglucosylase/hydrolase protein 30	GO:0004553;GO:0005618;GO:0005975;GO:0006073;GO:0010411;GO:0016762;GO:0042546;GO:0048046	IPR008263;IPR010713;IPR013320;IPR016455	PF00722;PF06955	cd02176		xyloglucan endotransglucosylase hydrolase protein	G	MDHRLRCFVTIPKIPFLLLLSLILVFSYVNAAFDLATIPFNDGYSPLFGDSNVVRSEDGNGVQLRLDRYTGSGFISSSMYQYGFFSSRIKLPSNYTAGICVAFYTSNGDVFEKSHDELDFEFLGNVAGKPWRFQTNLYGNGSTKRGREERYRLWFDPTKEFHRYSILWTAKNVIFYIDEVPIREVLRSEEMGGDYPSKPMSLYATIWDASNWATSGGKYKVNYKYAPFVTEFKDLVLKGCSADPIQEVSGTESCSDQHADLEAQDYAAVTPMRRLAMQRFRQRYMYYSYCYDTLRYPVPQPECVIVPSEKQRFKETGRLKFGGSHRRQSRRRGRTTTPVDDTDQGDM	ATGGATCATAGGTTACGTTGTTTTGTGACAATACCCAAAATTCCTTTTCTATTGCTACTTTCTCTGATTCTCGTCTTCAGTTACGTTAACGCAGCCTTCGACCTCGCTACTATACCCTTCAACGATGGCTATTCTCCGCTCTTCGGAGATAGCAACGTTGTTCGCTCCGAGGATGGCAACGGCGTACAACTCCGCCTCGATCGCTACACAGGTTCGGGTTTCATTTCCTCCAGTATGTACCAGTATGGATTCTTCAGCTCGAGAATCAAGTTGCCATCGAATTATACTGCTGGTATTTGCGTGGCCTTTTATACATCAAACGGTGATGTGTTCGAGAAGTCCCATGACGAGTTGGACTTTGAATTCCTAGGTAATGTCGCCGGAAAACCATGGCGGTTT…
Chr01	GmHk_01G000130.1	1341309	1345898	-	CSLD3_0	Cellulose synthase-like protein D3	GO:0016020;GO:0016760;GO:0030244	IPR013083;IPR029044	PF03552;PF14570			Glycosyl transferase, family 2	M	MLAEVEAAFKVAGPALILFLQCGVVHCIAMASKFKSVSSIRKITHLSGDMDQEDANGGRASLDNYSVHIPPTPDNQPMEISLERSNSRRVEDQYASSSLFTGGFNQLTRAHLKDKVTESESSHPQMAGAKGSSCAVPGCDGSLMTNERGLDVVPCECNYKICRDCYMDALRAGEGICPGCKDPYKEPEVQGGVANSQALPLPPPPGANKMDKSLSFLRSKNNEFDHAKWLFETKGSYGYGNAMWPNKEEEVDASSGSGSDWMGGDPNVFKEKQWRPLTRKLSISAAILSPYRLMILVRLVVLVFFLKWRVENPNEDAIWLWGMSVVCEIWFAFSWLLDQLPKLFPVNRVADLDVLKEKFETPNPTNPTGKSDLPGIDMFVSTADPEKEPPLVTANTILS…	ATGCTTGCAGAAGTTGAAGCAGCGTTTAAGGTTGCCGGGCCGGCATTGATTTTGTTTCTGCAGTGTGGTGTGGTTCATTGCATTGCCATGGCTTCTAAATTCAAGAGTGTGTCCTCCATTCGGAAGATCACGCATCTGAGCGGTGATATGGATCAGGAGGATGCGAATGGGGGAAGGGCTAGTCTTGATAACTACTCAGTTCACATTCCTCCAACGCCTGATAACCAGCCTATGGAGATTTCGCTGGAGAGGTCGAATTCTCGGAGAGTGGAGGACCAATACGCTTCTAGTTCTTTGTTCACCGGTGGCTTTAATCAGCTCACACGCGCTCATTTGAAGGACAAAGTGACTGAGTCAGAATCCAGCCACCCCCAGATGGCTGGTGCAAAAGGGTCCTCT…
Chr01	GmHk_01G000131.1	1355275	1359816	-	abhd17c_1	Alpha/beta hydrolase domain-containing protein 17C	GO:0016787	IPR029058	PF01738			Hydrolase	S	MGCMVSQLAAKFAFFPPSPPTYQLKKSGEDGKLTVVSAAAPIPHADDTSLDVLLVDTKHGNKIVAFYLRNPYARLTLLYSHGNAADLGQLYDLFVQLKVNLRVNLMGYDYSGYGASTGKPSESSTYADIEAIYECLETEYGVSQEDVILYGQSVGSGPTLHLAAKLPRLRGVVLHSGILSGLRVLCHVKFTFCFDIYKNINKIKKVKCPVLVIHGTEDDVVNWLHGNGLWKMARESYDPLWIKGGGHCNLELYPDYIRHLCKFIQEMESMTTEKRLKKIRQSANQSKSNTGCTCSRCCRVKCCRVKCPECSNCCCCMNVSWSINCPECCWRPSCKCCCFPKFRSCFGSICCTKWSWPSCCATKCSLSLPSCCCCYPKRARPNCCMSCFCWQCCVGKHSD…	ATGGGGTGCATGGTGTCTCAGCTAGCCGCGAAATTCGCCTTCTTTCCGCCGTCTCCGCCGACGTACCAGCTCAAGAAGAGCGGCGAGGACGGCAAGCTCACGGTGGTCTCCGCGGCGGCTCCGATTCCCCACGCCGATGACACCTCCCTGGACGTTCTCCTCGTCGACACGAAGCATGGGAACAAGATTGTGGCGTTTTATCTCAGAAACCCCTACGCGCGGCTCACTCTTCTCTATTCTCATGGCAATGCCGCTGACTTGGGTCAACTCTATGATCTCTTCGTGCAACTCAAGGTCAATCTTAGAGTTAATCTCATGGGATATGACTACTCTGGATATGGAGCATCTACTGGCAAGCCTAGTGAATCCAGCACATATGCTGACATAGAGGCAATATAT…
Chr01	GmHk_01G000131.2	1355275	1359816	-	abhd17c_1	Alpha/beta hydrolase domain-containing protein 17C	GO:0016787	IPR029058	PF01738			Hydrolase	S	MGCMVSQLAAKFAFFPPSPPTYQLKKSGEDGKLTVVSAAAPIPHADDTSLDVLLVDTKHGNKIVAFYLRNPYARLTLLYSHGNAADLGQLYDLFVQLKVNLRVNLMGYDYSGYGASTGKPSESSTYADIEAIYECLETEYGVSQEDVILYGQSVGSGPTLHLAAKLPRLRGVVLHSGILSGLRVLCHVKFTFCFDIYKNINKIKKVKCPVLVIHGTEDDVVNWLHGNGLWKMARESYDPLWIKGGGHCNLELYPDYIRHLCKFIQEMESMTTEKRLKKIRQSANQSKSNTGCTCSRCCRVKCCRVKCPECSNCCCCMNVSWSINCPECCWRPSCKCCCFPKFRSCFGSICCTKWSWPSCCATKCSLSLPSCCCCYPKRARPNCCMSCFCWQCCVGKHSD…	ATGGGGTGCATGGTGTCTCAGCTAGCCGCGAAATTCGCCTTCTTTCCGCCGTCTCCGCCGACGTACCAGCTCAAGAAGAGCGGCGAGGACGGCAAGCTCACGGTGGTCTCCGCGGCGGCTCCGATTCCCCACGCCGATGACACCTCCCTGGACGTTCTCCTCGTCGACACGAAGCATGGGAACAAGATTGTGGCGTTTTATCTCAGAAACCCCTACGCGCGGCTCACTCTTCTCTATTCTCATGGCAATGCCGCTGACTTGGGTCAACTCTATGATCTCTTCGTGCAACTCAAGGTCAATCTTAGAGTTAATCTCATGGGATATGACTACTCTGGATATGGAGCATCTACTGGCAAGCCTAGTGAATCCAGCACATATGCTGACATAGAGGCAATATAT…
Chr01	GmHk_01G000132.1	1376077	1384822	-	PLSB_1	Glycerol-3-phosphate acyltransferase, chloroplastic	GO:0004366;GO:0006650;GO:0016746	IPR016222;IPR023083;IPR038114	PF01553;PF14829			glycerol-3-phosphate acyltransferase	I	MSTTGSSAYHCVAHLPNNKTMFMLSTPPTTTFFATPRVLPFLSSKLSSSSSSSTASSSPCCSSITPKVKSKDNNNCYLVSAKHSPANMSASVSSRTFLNARNEQELLAGIRKEVEAGSLPANVAAGMEEVYNNYKSAVIQSGDPKSKEIVLSNMIALLDRIFLDVTDPFVFQPHHKAKREPFDYYVFGQNYIRPLVDFKNSYVGNMPLFIEMEEKLKQGHNIILMSNHQTEADPAIIALLLETRLPYIAENMTYVAGDRVITDPLSKPFSIGRNLICVYSKKHMLDDPALVEMKRNANIRALKEMAMLLRSGSQIVWIAPSGGRDRPDPHTGEWAPAPFDTSSVDNMRRLVEHSGPPGHVYPLAILCHDIMPPPLKVEKEIGEKRIISFHGTGISVAPA…	ATGAGCACGACCGGTTCTTCGGCTTACCACTGTGTGGCACACCTCCCAAATAATAAGACTATGTTTATGCTCTCTACGCCGCCAACAACCACATTCTTCGCTACGCCTAGGGTTCTTCCGTTTCTCTCTTCAAAACTTTCTTCTTCTTCTTCTTCTTCTACTGCGTCGTCCTCGCCTTGTTGCTCCTCCATCACTCCCAAGGTTAAATCCAAAGATAACAACAATTGCTACCTCGTCTCCGCTAAACATTCTCCCGCTAACATGTCCGCTTCGGTTTCGTCACGCACCTTCCTCAACGCTCGGAACGAACAAGAGCTTCTAGCTGGAATCAGGAAAGAAGTAGAAGCTGGATCTCTGCCTGCTAATGTTGCTGCAGGAATGGAAGAAGTGTACAATAAC…
Chr01	GmHk_01G000132.2	1376077	1384822	-	PLSB_1	Glycerol-3-phosphate acyltransferase, chloroplastic	GO:0004366;GO:0006650;GO:0016746	IPR016222;IPR023083;IPR038114	PF01553;PF14829			glycerol-3-phosphate acyltransferase	I	MSTTGSSAYHCVAHLPNNKTMFMLSTPPTTTFFATPRVLPFLSSKLSSSSSSSTASSSPCCSSITPKVKSKDNNNCYLVSAKHSPANMSASVSSRTFLNARNEQELLAGIRKEVEAGSLPANVAAGMEEVYNNYKSAVIQSGDPKSKEIVLSNMIALLDRIFLDVTDPFVFQPHHKAKREPFDYYVFGQNYIRPLVDFKNSYVGNMPLFIEMEEKLKQGHNIILMSNHQTEADPAIIALLLETRLPYIAENMTYVAGDRVITDPLSKPFSIGRNLICVYSKKHMLDDPALVEMKRNANIRALKEMAMLLRSGSQIVWIAPSGGRDRPDPHTGEWAPAPFDTSSVDNMRRLVEHSGPPGHVYPLAILCHDIMPPPLKVEKEIGEKRIISFHGTGISVAPA…	ATGAGCACGACCGGTTCTTCGGCTTACCACTGTGTGGCACACCTCCCAAATAATAAGACTATGTTTATGCTCTCTACGCCGCCAACAACCACATTCTTCGCTACGCCTAGGGTTCTTCCGTTTCTCTCTTCAAAACTTTCTTCTTCTTCTTCTTCTTCTACTGCGTCGTCCTCGCCTTGTTGCTCCTCCATCACTCCCAAGGTTAAATCCAAAGATAACAACAATTGCTACCTCGTCTCCGCTAAACATTCTCCCGCTAACATGTCCGCTTCGGTTTCGTCACGCACCTTCCTCAACGCTCGGAACGAACAAGAGCTTCTAGCTGGAATCAGGAAAGAAGTAGAAGCTGGATCTCTGCCTGCTAATGTTGCTGCAGGAATGGAAGAAGTGTACAATAAC…
Chr01	GmHk_01G000133.1	1387372	1387911	-	-	hypothetical protein							R	MADAEFSAARKDRLKAAMVKLVAAQLHLESTLDALLLKLPSRTSHHPSSSSVQSPPSPPPSRLTAPPCLVPMQHNQSPLPTPLPTPTSSTMPTPPSMPPSLPMLTAPPCPAPVQPFLPPLSGLLPMPALHLLNLGLVRTAISFNKLISIVPLYGTAMTAYKLQPVAFALCTIANPGAPE	ATGGCGGATGCCGAATTTTCTGCCGCTCGCAAGGATCGCCTTAAGGCCGCCATGGTCAAACTTGTTGCAGCTCAACTCCACCTCGAATCCACACTGGATGCCCTTCTTCTAAAACTGCCTTCGAGAACCAGCCACCACCCATCTTCTTCCTCCGTGCAGTCACCACCGTCGCCTCCACCTTCCAGGCTGACTGCACCTCCATGCCTCGTACCGATGCAACACAACCAATCACCCTTGCCTACTCCGCTACCCACGCCGACTTCATCAACCATGCCGACTCCGCCGTCCATGCCGCCTTCGCTTCCCATGCTGACTGCGCCTCCATGTCCTGCACCCGTGCAACCATTCCTTCCACCATTGTCGGGTCTACTTCCTATGCCTGCTCTTCATCTGCTCAAT…
Chr01	GmHk_01G000134.1	1392105	1396033	+	At1g32220_0	Uncharacterized protein At1g32220, chloroplastic		IPR016040;IPR036291	PF13460			epimerase dehydratase	GM	MASFLSFLPAVSARPIPTSAFSPKRPLFQTPPALHFKNHRFAVSCSYAEAGVYANSSSNTIDVVADVRSERIVVLGGNGFVGSSICKAAVSKGIEVISLSRSGRPTYSGDVFYVNWDEVLVGATAVVSTLGGFGSEEQMKRINGEANVVAVNAAKEYGIPKFILISVHDYNLPSFLLSSGYFTGKRKAESEVLSKYPNSGIVLRPAFIYGKRRVDGFELPLDLVGEPAEKILRAVENFTKPLSSLPASDLLLAPPVSVDDVALAVINGVTDDDFFGIFTIDQIKEAANKVRV	ATGGCGTCGTTTTTGTCTTTTCTCCCTGCCGTTTCCGCTCGTCCCATTCCCACCAGCGCCTTCTCTCCCAAAAGACCTCTCTTTCAAACTCCACCCGCCTTGCATTTCAAAAATCACCGGTTTGCAGTTAGTTGCAGTTATGCAGAAGCAGGTGTCTATGCTAATTCTAGCTCTAACACCATAGATGTTGTGGCTGATGTTAGAAGTGAGCGGATTGTAGTCTTAGGAGGGAATGGCTTTGTTGGTTCTTCCATATGCAAGGCAGCAGTGTCCAAGGGCATAGAAGTCATAAGCCTAAGCAGGTCAGGGAGACCTACTTACTCAGGAGATGTTTTTTATGTAAACTGGGATGAAGTACTTGTTGGAGCTACTGCAGTTGTTTCAACACTTGGAGGTTTT…
Chr01	GmHk_01G000135.1	1397992	1400696	-	-	hypothetical protein						NA	S	MGKEGDLWDDSSLINAFDQAISTFNKMHSSGKHKGAATAREADTIIGENGSNVDTTRDADTNIPATDVPDSGETGNLSKLEENHQTESQVDQPCLDSTSGQDIQNAQNGYAYAQGGDDYNQLVVQYYELEEKRAKILEHLNQYGGWNYQNVAADSSSGVPYSNFQDYSMAAYQVSDPNAVCTCCPCYSQCLPAPCTSVPGCSLGGSSVGKQCNDLSVEKDHKMSFPCEDGEIHKMAMGAAEKALSTIRTTISGDFNVNEGKERNNSEPEKINGSETDLAAVLNAWYSAGFYTGKYLAEQSIQNGRQN	ATGGGGAAGGAAGGAGATCTATGGGACGATTCATCTCTCATCAATGCCTTCGACCAAGCTATTTCTACTTTCAACAAAATGCATAGCAGCGGCAAACACAAAGGCGCCGCCACGGCTCGAGAGGCGGACACAATCATCGGAGAAAATGGCTCCAATGTTGACACTACAAGGGATGCTGATACGAATATTCCAGCTACTGATGTGCCTGATTCAGGTGAAACTGGTAATTTGTCAAAGTTGGAAGAAAATCATCAAACAGAGTCACAGGTGGATCAACCTTGTCTGGATTCAACAAGTGGCCAAGACATCCAGAATGCGCAGAACGGTTATGCATATGCACAAGGTGGAGATGATTATAATCAGTTAGTTGTGCAATACTATGAACTTGAGGAGAAAAGG…
Chr01	GmHk_01G000136.1	1407623	1413328	+	ROC3_0	Homeobox-leucine zipper protein ROC3	GO:0003677;GO:0006355;GO:0008289;GO:0043565	IPR002913;IPR009057;IPR017970;IPR023393	PF00046;PF01852	cd00086;cd08875		Homeobox-leucine zipper protein	K	MYGDCQVMSSMGGNVVVNSDTLFSSSIQNSSFNFIPTMPFQPFPSMKEEDGILRGKEEMESGSGSEQLVEDKSGYEQESHEEPTKKKRYHRHTARQIQEMESLFKECPHPDDKQRLKLSHELGLKPRQVKFWFQNRRTQMKAQQDRADNMILRAENETLKSENYRLQAALRNVICPNCGGPCIMGADMGFDEHQLRIENARLREELERVCCLTTRYTGRPIQTMAADPTLMAPSLDLDMNMYPRHFSDPIAPCTEMIPVPMLPPEASPFSEGGVLMEEEKSLALELAASSMAELVKMCQTNEPLWIQSSEGEREVLNFEEHARMFVWPQNLKNRSELRTEASRDTSVVIINSVTLVDAFLDAQKWMELFPTIVSRAKTVQIISSGASGLASGTLQLMCA…	ATGTATGGGGATTGCCAAGTTATGTCAAGTATGGGAGGGAACGTAGTAGTAAACTCAGACACTCTCTTCTCCTCCTCGATCCAGAACTCTAGCTTCAACTTCATCCCCACCATGCCCTTTCAACCTTTTCCTTCCATGAAAGAAGAAGATGGGATCTTGCGAGGGAAGGAAGAGATGGAAAGTGGATCAGGAAGTGAACAATTAGTTGAAGACAAATCAGGGTATGAACAAGAGAGTCATGAAGAACCCACAAAGAAGAAACGTTATCACAGGCACACTGCTCGCCAGATCCAAGAAATGGAATCTTTGTTCAAGGAATGCCCACACCCGGATGATAAGCAGAGGCTGAAACTGAGCCATGAATTGGGTCTTAAACCGCGCCAGGTCAAGTTCTGGTTC…
Chr01	GmHk_01G000137.1	1430724	1436430	+	JMJ706_0	Lysine-specific demethylase JMJ706		IPR003347;IPR003349;IPR004198	PF02373;PF02375;PF02928			jumonji domain protein	S	MWRAWERLRNEMVERRVTLSKEARNGLEFLKRKRLQRAKFVTATQTSVANMMSRSGNALRASASCGPRFHGNANVFSKRKVDKFDTNDLDWTDKILECPVYSPTKEEFEDPLIYLQKIAPEASKYGICKIISPLSASVPAGVVLMKEKAGFKFTTRVQPLRLAEWDTEDKVTFFMSGRNYTFRDFEKMANKVFARRYCSAGCLPATYLEKEFWHEIGCGKMETVEYACDVDGSAFSSSPTDQLGNSKWNLKKLSRLPKSILRLLETSIPGVTEPMLYIGMLFSIFAWHVEDHYLYSINYHHCGASKTWYGIPGHAALDFERVVREHVYTNDILSSDGEDGAFDVLLGKTTLFPPNILLEHEVPVYKAVQKPGEFIITFPRAYHAGFSHGFNCGEAVNFA…	ATGTGGCGAGCCTGGGAGCGACTTCGTAATGAAATGGTGGAAAGAAGAGTGACTTTATCAAAGGAAGCTAGAAATGGGTTAGAATTTTTGAAGCGTAAAAGGCTTCAGCGTGCAAAATTTGTCACTGCCACCCAGACAAGTGTTGCTAACATGATGAGCAGAAGTGGAAATGCTTTAAGAGCTTCAGCATCATGTGGCCCAAGATTTCATGGTAATGCTAATGTCTTTTCCAAGCGCAAGGTGGATAAGTTTGATACAAATGACCTGGATTGGACTGATAAAATTCTAGAATGTCCTGTGTATTCTCCAACAAAGGAGGAATTTGAGGATCCTTTAATTTATTTGCAAAAGATTGCTCCAGAAGCTTCTAAATATGGTATATGCAAGATTATTTCCCCT…
Chr01	GmHk_01G000138.1	1462730	1467117	+	KAN2_0	putative transcription factor KAN2	GO:0003677	IPR009057			TIGR01557	Transcription factor	K	MELFPAQPDLSLQISPPNANPTSSWRRSTEEDMDLGFWKRALDSRNSIQSTMAKQDSCFDLSLSNPKASDNNNSNLIHHHHFQTSNATTIINPFQLPFQQNHFFHQQQQPLFQPQHQSLSQDLGFLRPIRGIPVYQNPPPIPFTQHHHLPLEASTTTPSIISNTNTGSTPFHSQALMRSRFLSRFPAKRSMRAPRMRWTSTLHARFVHAVELLGGHERATPKSVLELMDVKDLTLAHVKSHLQMYRTVKTTDRAAASSGQSDVYDNGSSGDTSDDLMFDIKSSRRSDLSVKQGRSSVNQDKKYHGLWGNSSREAWLHGKTKADSVGNVPSYLEKEMDPKCLSYERISDGSSSSNLSGSSPKKPNLDLEFSLGQPL	ATGGAGCTATTCCCAGCACAACCAGACTTGTCCTTACAAATCAGCCCTCCAAACGCCAATCCCACATCAAGTTGGAGGAGAAGCACAGAAGAAGACATGGATTTGGGGTTTTGGAAGAGAGCCTTGGACTCAAGAAACTCCATTCAATCAACAATGGCCAAACAAGACTCTTGCTTCGACCTCTCCCTCTCCAATCCAAAAGCCTCAGATAACAACAACTCCAACCTCATTCATCACCACCACTTCCAAACAAGTAATGCCACCACCATCATCAACCCTTTCCAACTACCCTTTCAGCAAAACCACTTCTTCCACCAGCAGCAGCAGCCACTGTTCCAACCTCAGCACCAAAGCCTAAGCCAAGACCTTGGCTTTCTAAGACCCATTAGAGGAATCCCA…
Chr01	GmHk_01G000139.1	1482099	1485807	+	SKL2	putative inactive shikimate kinase like 2, chloroplastic		IPR007052;IPR008978;IPR031322	PF01202			Shikimate kinase	S	MATVPARLCYLSTNPTTRNLNFSVLKPNVLSLRSFSLPQKHYLRLRPCKCSSTAPVSTTTYEFSDGSSEVELRLNIGGLDVRSSRDILVDTNDTSLAIRVLRPGSPITLIETNPLFDRVKSSETIWLVSALESTWKKSGSSLWLLSDLSDLDRYIDDDQLVVNFKKQDPDLKWPDIMESWESLTAGSPQLLQGTSIYLVGDSTEINQKVAQELATGLGYTPLSTKELLELYTKQTVDSWLLAEGSDSVAEAESAVLESISSHARAVVATLGGQHSAAGRAGKWQHLYAGFTVWLSKTEALDEDSARLETHKNVKDGIISYTNADVVVKLQGWDPAYAKSVAQACLSALKQLIQSDKKLPGKKSLYIRLGCRGDWPNIKPPGWDPSSEGNTTLGTQ	ATGGCAACTGTTCCTGCTCGTCTCTGTTATCTCTCCACAAACCCCACAACCAGAAACCTCAACTTCTCAGTTTTAAAACCAAATGTGTTGTCACTGCGTTCATTCTCTCTTCCTCAAAAACACTATCTTCGTCTCCGTCCCTGCAAGTGTTCCTCCACCGCCCCCGTGTCCACCACCACCTACGAGTTTTCTGATGGTTCTTCGGAGGTGGAGTTAAGATTAAACATAGGAGGTTTGGATGTCCGAAGCTCCAGAGATATATTGGTTGATACAAATGATACCTCTTTAGCTATCAGAGTGTTGCGGCCAGGATCTCCCATCACACTCATAGAAACTAATCCTCTTTTTGATAGGGTTAAATCCTCCGAAACAATATGGTTGGTTTCTGCACTTGAAAGT…
Chr01	GmHk_01G000140.1	1498941	1501683	+	PG1_0	Plastoglobulin-1, chloroplastic		IPR006843	PF04755			FiBrilliN	S	MVQISVSVVSLYRHPVPMALLAVTSRAPFLFSPNPKTLSLSSFYSHLSLSPRSPRFPSLRFRSATGDASDAGKPVGKISDEWGEDYDPEAEALTSKLPDSDPPKDEDEWQEGGAPDAGGYVDGGNGTPVTGAEDPAEEEVDDKLEALKRALVDTLYGTELGIRAGSEVRAEVSELVSQLEAANPTLAPVEEPALLNGNWVLLYTASSELLPLLAAGRLPLLKVDKITQTIDTSSSTIINSTTLSSPFASLSFSASASFEVRTPTRIQVTFKEGSIQPPEIKSNVELPENVDIFGQKLSLQPLQQSLGPLQGLVENISRVISGQPPLKIPIPGERTSSWLLTTYLDKDLRISRGDGGLFVLAREGSPLLDQ	ATGGTTCAGATATCAGTTTCGGTGGTTTCACTCTATCGCCACCCAGTTCCGATGGCTCTCCTCGCCGTCACTTCGCGCGCTCCCTTCCTCTTCTCCCCAAACCCTAAAACACTTTCTCTATCCTCTTTCTACTCCCACCTCTCTCTCTCTCCTCGCTCTCCCAGGTTCCCTTCTCTCCGCTTCCGCTCTGCCACCGGAGACGCCAGCGACGCCGGCAAGCCCGTCGGTAAGATCTCCGACGAGTGGGGCGAGGACTACGATCCCGAGGCCGAAGCATTGACCTCCAAGCTTCCCGACTCGGACCCTCCCAAGGACGAGGACGAGTGGCAGGAAGGAGGGGCGCCCGACGCCGGCGGCTACGTCGACGGCGGGAACGGAACTCCGGTCACCGGAGCTGAG…
Chr01	GmHk_01G000141.4	1487127	1491092	-	RCD1_3	Inactive poly [ADP-ribose] polymerase RCD1	GO:0003950	IPR022003	PF12174			inactive poly ADP-ribose polymerase RCD1-like	S	MEAKIAKALDRVALNLKRKRATRYAAHLSGASQPMLGHWSSLTSQTSKAVKRMRLGGYRNRLTNAGPHIGRSLARRFLNYKKSGRLERLMFYENGEWLDFPKDVVDLVKKDLEVKKAAVEIESNGYHLLFDFLHLHKVDLKTGLQQPIALIDEAGCCFFPEIYAASDEEPYNLSKQECGKSPDSYASNEIKLHLEVEINGVDQSRLSECSGESNALVKGIQIDTKQNCCQYDVEVEDSINKKDCGNVGEDIQQHQDIGLDAYTESVYGILDLNSVQKMFLKGMSSFGSTDSDIAEIYQCSGASMQARWELFQKQAELTKKNHGEANIRYAWLASSKGELSTMMNYGLSHYGLSGSKCTYGIGVHLAAVTCPDASVRYCDVDENGVRHLALCRVIMGNME…	ATGGAAGCAAAAATCGCAAAGGCATTGGATAGGGTTGCACTCAATCTGAAGCGCAAGCGAGCGACCCGATATGCTGCACATTTAAGTGGAGCTTCGCAGCCAATGTTAGGGCATTGGTCATCTCTTACGTCACAAACAAGCAAGGCTGTCAAACGCATGAGATTGGGTGGATATAGAAACAGGCTGACAAATGCTGGTCCTCATATTGGACGGTCCTTAGCTAGGCGTTTTTTGAATTATAAAAAGAGTGGGAGACTGGAGCGTTTGATGTTCTATGAGAATGGGGAATGGTTGGACTTTCCAAAGGATGTTGTTGACTTGGTTAAGAAGGATCTTGAAGTCAAGAAGGCAGCTGTGGAGATAGAATCAAATGGGTATCATCTTTTGTTTGATTTTTTA…
Chr01	GmHk_01G000142.1	1512647	1513235	+	-	hypothetical protein						NA	S	MHRQSLGSPSPKVPKLITDEDDDAPKPHRLSLSLSSPPPTPPHKFVHLIPLLTLLCFFVLYLFSHSPSPSDLNHFTGFNRSPSHRLDLAKKIGGDIGQYMDVKRSDVLAIRSLQQLPKPRPHRKLADF	ATGCATAGACAATCCTTGGGTTCTCCTTCTCCCAAAGTCCCCAAGCTCATCACCGACGAAGACGACGATGCTCCCAAACCTCACCGTCTCAGTCTCAGCCTCTCCTCGCCGCCGCCTACGCCGCCGCACAAGTTCGTCCACCTCATTCCTCTCCTCACTCTCCTCTGCTTCTTCGTCCTCTACCTCTTCTCCCACTCTCCCTCTCCATCAGACTTGAATCATTTCACCGGATTCAACCGCTCGCCCTCGCACCGTCTAGATTTGGCGAAGAAGATCGGCGGCGACATTGGACAATACATGGATGTAAAAAGAAGCGATGTTTTGGCGATCCGAAGTTTGCAACAGCTTCCGAAACCTCGCCCTCACCGGAAACTCGCCGATTTTTAA
Chr01	GmHk_01G000143.1	1518763	1521829	-	BPA1_1	Binding partner of ACD11 1	GO:0003676	IPR012677;IPR035979	PF00076			actin cytoskeleton protein	S	MTIKTVKVSNVSLGATEQDIKEFFSFSGDIEYVELRSHDERSQIAYITFKDSQGAETALLLSGATIVDMPVTITQDPDYQLPPAALASSVRETQTPGGADSALRKAEDVVSGMLAKGFILGKDAVNKAKTFDEKHQLSSTASAKVASFDQKIGLSEKISAGATVVSDRVREVDQKFQVSEKTKSAFAAAEQTVSNAGSALMKNRYVLTGASWVTGAFSKVSKAAGEVGQKTKEKVEGAEEHQKRKVEDQYAQVLSESPKAAEASEQKSSKPAPAQGLIL	ATGACGATAAAAACTGTTAAAGTCAGTAACGTTTCCTTGGGAGCAACTGAGCAAGACATTAAGGAGTTCTTTTCATTTTCTGGTGATATTGAATATGTTGAACTACGGAGCCATGATGAACGATCTCAAATTGCTTATATTACCTTCAAGGATTCACAGGGAGCTGAGACTGCACTACTGCTTTCAGGGGCAACAATAGTCGATATGCCAGTTACAATAACTCAGGATCCAGATTACCAGCTTCCACCTGCTGCGTTAGCGTCATCTGTAAGAGAAACTCAAACTCCTGGTGGTGCTGACTCTGCTTTACGGAAGGCAGAGGATGTGGTCTCCGGCATGCTAGCCAAGGGCTTTATCTTAGGAAAAGATGCTGTCAACAAAGCAAAGACCTTTGATGAG…
Chr01	GmHk_01G000143.2	1518763	1521829	-	BPA1_1	Binding partner of ACD11 1	GO:0003676	IPR012677;IPR035979	PF00076			actin cytoskeleton protein	S	MTIKTVKVSNVSLGATEQDIKEFFSFSGDIEYVELRSHDERSQIAYITFKDSQGAETALLLSGATIVDMPVTITQDPDYQLPPAALASSVRETQTPGGADSALRKAEDVVSGMLAKGFILGKDAVNKAKTFDEKHQLSSTASAKVASFDQKIGLSEKISAGATVVSDRVREVDQKFQVSEKTKSAFAAAEQTVSNAGSALMKNRYVLTGASWVTGAFSKVSKAAGEVGQKTKEKVEGAEEHQKRKVEDQYAQVLSESPKAAEASEQKSSKPAPAQGLIL	ATGACGATAAAAACTGTTAAAGTCAGTAACGTTTCCTTGGGAGCAACTGAGCAAGACATTAAGGAGTTCTTTTCATTTTCTGGTGATATTGAATATGTTGAACTACGGAGCCATGATGAACGATCTCAAATTGCTTATATTACCTTCAAGGATTCACAGGGAGCTGAGACTGCACTACTGCTTTCAGGGGCAACAATAGTCGATATGCCAGTTACAATAACTCAGGATCCAGATTACCAGCTTCCACCTGCTGCGTTAGCGTCATCTGTAAGAGAAACTCAAACTCCTGGTGGTGCTGACTCTGCTTTACGGAAGGCAGAGGATGTGGTCTCCGGCATGCTAGCCAAGGGCTTTATCTTAGGAAAAGATGCTGTCAACAAAGCAAAGACCTTTGATGAG…
Chr01	GmHk_01G000145.1	1524371	1528880	+	SYP22_0	Syntaxin-22	GO:0005484;GO:0006886;GO:0016020;GO:0016192	IPR006011;IPR006012;IPR010989	PF05739;PF14523	cd00179;cd15840		SYNtaxin	U	MSFQDIEAGRSFASRRNLINGKQDPTQAVASGIFQINTAVSTFQRLVNTLGTPKDTPELRDKLHKTRLHIGQLVKDTSAKLKQASEIDHNVEVNASKKIADAKLAKDFQAVLKEFQKAQRLSAERETAYTPFVPQALLPSSYTASEVDIGSDKTPEQRALLVESRRQEVLFLDNEISFNEAIIEEREQGIQEIQSQIGEVNEIFKDLAVLVHEQGAMIDDIGSNIEHSHEATAQAKSQLAKASKTQRSNSSLTCLLLVIFGIVLLIVIIVLAA	ATGAGCTTTCAGGACATCGAGGCCGGCCGTTCCTTCGCTTCCCGGCGAAATCTAATCAACGGCAAACAAGACCCCACGCAGGCGGTGGCTTCCGGCATCTTTCAGATCAACACCGCCGTCTCCACGTTCCAGAGACTCGTCAACACCCTCGGAACCCCCAAGGACACCCCCGAACTCCGCGATAAGCTGCACAAGACGAGACTGCACATTGGACAATTGGTGAAGGATACTTCGGCTAAGCTTAAGCAAGCTAGTGAGATTGATCACAACGTTGAAGTTAATGCAAGTAAGAAGATAGCAGATGCGAAGCTTGCAAAAGATTTTCAGGCGGTGTTGAAAGAATTTCAGAAGGCACAGCGTCTTTCAGCGGAGAGGGAAACTGCTTACACTCCTTTTGTT…
Chr01	GmHk_01G000146.1	1531152	1534029	+	SAMBA_0	Protein SAMBA						NA	S	MNSSSPAHSSLSTTAVVGGGGGGGGSSNATVSIDDFHLPCDPISSQERKDEAMLVLKSDLMAALNKEVKSLVEDNWKFEGPRSRIHLVSHRGGGHLYRPTEISKNWNLTPPK	ATGAATAGTTCATCGCCGGCCCACTCTTCACTATCGACGACGGCGGTTGTAGGCGGCGGTGGTGGTGGCGGCGGCAGCAGCAACGCCACTGTTTCCATTGACGATTTTCATCTCCCGTGTGATCCCATCTCGTCGCAAGAGCGTAAAGACGAGGCCATGCTAGTTTTAAAATCAGATCTCATGGCTGCACTCAACAAGGAGGTTAAATCATTGGTTGAAGATAACTGGAAGTTTGAAGGGCCACGTTCGCGGATCCACCTCGTATCACATCGAGGTGGTGGTCATCTCTATAGGCCCACAGAAATTTCAAAGAATTGGAATTTGACTCCACCAAAATAG
Chr01	GmHk_01G000147.1	1535256	1536227	-	MKK10	Mitogen-activated protein kinase kinase 10	GO:0004672;GO:0005524;GO:0006468	IPR008271;IPR011009;IPR017441	PF00069	cd06623		mitogen-activated protein kinase kinase	T	MLSLPKPHSDFPFQTHIPAVLPSPFSHVDSSPGIIKDLSDLEKLAVLGHGNGGIVYKVYHTKNRSFYALKVLRLNENGIGILEAEILKRVNSPYIVRCHAVFDNDNCSEGDIGFVMEYMEGGSLHDVLQEHHRLPEEVISVLAKRVLEGLNYLHGMHIVHRDIKPSNLLVNDKGEVKIADFGVSHVVEGKFEVSDSNAGTCAYMSPERIDPDRWGGENADEFAGDVWATGVVMLECFLGYFPLIGPGQRPDWATLMCAICFGEKLEMPEKASPEFQNFVRRCLEKNWRKRATVLELLHHPFVGRNCCCSSTGLGDYVLRGQVH	ATGCTTTCCTTACCAAAACCACATTCAGATTTTCCATTTCAAACACACATACCAGCAGTGCTGCCATCCCCATTTTCCCATGTAGATTCTTCTCCAGGCATCATCAAGGACCTTTCAGACCTTGAGAAACTAGCAGTTCTTGGCCATGGCAATGGCGGCATAGTCTACAAAGTTTATCACACGAAGAACCGTTCCTTTTATGCATTGAAGGTCTTACGCTTGAATGAGAATGGCATTGGCATCCTCGAGGCCGAGATTCTAAAACGAGTGAATTCGCCGTATATAGTAAGGTGTCATGCAGTTTTTGACAATGACAACTGCAGTGAGGGTGACATTGGCTTTGTCATGGAATACATGGAAGGAGGATCGTTGCACGATGTGTTGCAAGAACACCACAGG…
Chr01	GmHk_01G000148.1	1538483	1542207	-	HSFA1D_1	Heat stress transcription factor A-1d	GO:0003700;GO:0005634;GO:0006355;GO:0043565	IPR036388;IPR036390	PF00447			Transcription factor	K	MDGGGSTPAAPIPNANAPPPFLSKTYDMVEDPSTDAIVSWSATNNSFIVWDPPQFARDLLPKYFKHNNFSSFVRQLNTYGFRKVDPDRWEFANEGFLKGQKHLLRSITRRKPAHGQNHQQPQQPHGQSSSVGACVEVGKFGLEEEVERLKRDKNVLMQELVRLRQQQQTTDNQLQTMVQRLQGMEQRQQQMMSFLAKAVQSPGFFAQFVQQQNDSNRRITEVNKKRRLKQEGMAETEHAATPDGQIIKYQPMVNEAAKAMLRQIMKWDTSCVESLNKNSDNYVIGDASSSSSGMDSSSSSGWTSGVTLKEVSPASVQSSHVPAATGTQGHVPSTVKPEILSVPQAVASEKVMKDGAHDPPSIPVSQADVMIPDLPPITEMVTGNILDIPEENYMATETD…	ATGGACGGCGGCGGGTCCACTCCGGCGGCGCCGATTCCGAACGCGAACGCGCCGCCGCCTTTTCTGAGCAAGACCTACGACATGGTGGAGGACCCTTCCACCGACGCGATCGTGTCGTGGAGCGCAACGAACAACAGCTTCATCGTGTGGGACCCTCCGCAGTTTGCCAGAGACCTTTTGCCCAAATACTTCAAACACAACAACTTCTCCAGCTTCGTTAGACAGTTAAACACTTACGGTTTCAGGAAGGTTGATCCAGATCGCTGGGAATTTGCAAATGAGGGTTTTTTGAAGGGTCAAAAGCACTTGCTTAGGAGTATTACACGACGAAAACCTGCCCATGGTCAAAATCATCAACAGCCTCAGCAACCGCATGGACAGAGTTCATCGGTAGGGGCA…
Chr01	GmHk_01G000148.2	1539493	1542207	-	HSFA1D_1	Heat stress transcription factor A-1d	GO:0003700;GO:0005634;GO:0006355;GO:0043565	IPR036388;IPR036390	PF00447			Transcription factor	K	MDGGGSTPAAPIPNANAPPPFLSKTYDMVEDPSTDAIVSWSATNNSFIVWDPPQFARDLLPKYFKHNNFSSFVRQLNTYGFRKVDPDRWEFANEGFLKGQKHLLRSITRRKPAHGQNHQQPQQPHGQSSSVGACVEVGKFGLEEEVERLKRDKNVLMQELVRLRQQQQTTDNQLQTMVQRLQGMEQRQQQMMSFLAKAVQSPGFFAQFVQQQNDSNRRITEVNKKRRLKQEGMAETEHAATPDGQIIKYQPMVNEAAKAMLRQIMKWDTSCVESLNKNSDNYVIGDASSSSSGMDSSSSSGWTSGVTLKEVSPASVQSSHVPAATGTQGHVPSTVKPEILSVPQAVASEKVMKDGAHDPPSIPVSQADVMIPDLPPITEMVTGNILDIPEENYMATETD…	ATGGACGGCGGCGGGTCCACTCCGGCGGCGCCGATTCCGAACGCGAACGCGCCGCCGCCTTTTCTGAGCAAGACCTACGACATGGTGGAGGACCCTTCCACCGACGCGATCGTGTCGTGGAGCGCAACGAACAACAGCTTCATCGTGTGGGACCCTCCGCAGTTTGCCAGAGACCTTTTGCCCAAATACTTCAAACACAACAACTTCTCCAGCTTCGTTAGACAGTTAAACACTTACGGTTTCAGGAAGGTTGATCCAGATCGCTGGGAATTTGCAAATGAGGGTTTTTTGAAGGGTCAAAAGCACTTGCTTAGGAGTATTACACGACGAAAACCTGCCCATGGTCAAAATCATCAACAGCCTCAGCAACCGCATGGACAGAGTTCATCGGTAGGGGCA…
Chr01	GmHk_01G000149.1	1551408	1558410	-	At1g05670_0	Pentatricopeptide repeat-containing protein At1g05670, mitochondrial	GO:0005515	IPR011990	PF01535;PF12854;PF13041		TIGR00756	Pentatricopeptide repeat-containing protein	S	MELKLRLRYFTTKNKLRCQCNAIVHTRKTPPSLQPFFSSPQQFGPTKPPELAILCRQQARTGSFFQISLRGRGGCDCKMRSIMALVVESIYGENIVSLERWKGLRCLQIHIHVDVLGEIAITANLNFLNQLETTFAQIHVKEGTVSNLQCPEAKCACMIPTGLLKPFLDDTDYERWESMILEKTLASMSDAVYCPRYEASDFADVLGPSANTEEASNASSCLFQLGIDECFFMSLICFLGCGLIRRQVHFQRQCLFRFYSSASSALMLEDHVFDESPKSHFVINRPAPHVPATRSELFPLVSRVFKSLSWSVARKKKFGNWVECHGFSHSISCFRIIVHAFALAGMRLEVWALLRDIVGFCNEAKYDTFELFSAFLDSPQHVERSGVVFDVLISVFASN…	ATGGAATTAAAATTAAGATTAAGATATTTTACCACTAAGAACAAATTAAGGTGCCAATGTAACGCCATAGTTCACACGCGGAAGACTCCTCCTTCACTCCAACCCTTCTTCTCCTCACCACAACAATTTGGGCCCACCAAACCACCCGAACTTGCAATACTGTGTCGCCAACAAGCCCGAACCGGGTCCTTCTTCCAAATCTCACTCCGTGGTAGAGGAGGATGTGATTGCAAGATGAGAAGTATTATGGCACTTGTGGTGGAGTCAATTTATGGAGAAAACATTGTCAGCCTTGAGAGGTGGAAAGGCCTGCGTTGTTTACAGATACATATACACGTTGATGTTTTGGGTGAAATTGCCATCACTGCTAACTTGAACTTTCTCAATCAACTTGAGACT…
Chr01	GmHk_01G000150.1	1564530	1566756	+	Alg14_0	UDP-N-acetylglucosamine transferase subunit ALG14	GO:0006488		PF08660			asparagine-linked glycosylation 14 homolog (S. cerevisiae)	S	MHTNFLCGFQMAWLPIFGKRKPSCKDSNLQGIVLSIVKDLTLGRGVVAEICEEDDEDVSVALTDILKLPLMDKSNGCSFSSISSIAVFSSAVFVVSLILVRLLYVLYCSSKPLSKRASKPFSTLIILGSGGHTAEMLNLLAVLQKGRFNPRFYIAAATDNMSLQKAQLLENSLAAENATRVTDTAQFMKIYRSREVGQSYITSVWTTFVAMVHALWLMIKIRPEVILCNGPGTCIPLCAIAFIFKVLGIRWSLIFYVESIARVRRLSLRGLLLYKLRMADKLFVQWPQLQRQYPRATYAGRLM	ATGCATACCAACTTCCTATGTGGATTTCAAATGGCTTGGTTGCCCATTTTTGGTAAAAGAAAACCCAGTTGCAAAGATTCTAATCTACAGGGGATTGTGTTGTCCATAGTTAAAGATCTCACGCTTGGTAGGGGTGTGGTGGCTGAGATTTGTGAAGAGGATGATGAAGATGTAAGTGTAGCTCTGACTGATATCTTGAAGCTACCTCTGATGGATAAAAGCAATGGCTGCAGCTTCTCTAGCATATCTTCAATTGCTGTCTTTTCAAGTGCTGTTTTTGTTGTCTCCTTGATTTTGGTTCGTCTCCTTTATGTCTTATACTGTAGCAGCAAGCCCTTGAGCAAAAGGGCTTCAAAACCTTTTAGTACCCTTATTATTTTAGGATCAGGTGGTCATACT…
Chr01	GmHk_01G000151.5	1584202	1585445	+	ABCB10_1	ABC transporter B family member 10	GO:0005524;GO:0016021;GO:0016887	IPR003593;IPR017871;IPR027417;IPR036640	PF00005	cd03249		(ABC) transporter	V	MTHQMVVTHVLRVYTFCRYGSVLMEKELASFKSIMKAFFVLIVTALAMGETLALAPDLLKGNQMVASVFEVMDRKSGISCEVGEELKTVDGTIELKRINFSYPSRPDVIIFKDFNLRVPAGKSVALVGQSGSGKSSVISLILRFYDPTSGRVLIDGKDITRLNLKSLRRHIGLVQQEPALFATSIYENILYGKEGASDSEVIEAAKLANAHNFISGLPEGYSTKVGERGVQLSGGQRQRVAIARAVLKNPEILLLDEATSALDVESERIVQQALDRLMQNRTTVMVAHRLSTIRNADQISVLQDGKIIDQGTHSSLIENKNGAYYKLVNLQQQQHQL	ATGACTCATCAAATGGTGGTTACCCATGTGCTGAGAGTGTATACCTTTTGCAGGTATGGATCTGTTTTAATGGAAAAGGAGCTTGCTAGCTTTAAATCAATTATGAAGGCATTTTTTGTTTTGATAGTAACAGCACTGGCCATGGGGGAGACATTGGCCCTGGCCCCAGACCTTTTGAAAGGGAATCAAATGGTTGCATCAGTTTTTGAAGTGATGGATAGAAAGTCAGGAATATCATGTGAGGTTGGAGAAGAGTTGAAGACAGTGGATGGAACAATCGAGCTCAAAAGAATCAATTTCAGCTACCCTTCAAGGCCAGATGTAATTATTTTCAAGGATTTCAATCTAAGAGTTCCTGCAGGCAAGAGTGTTGCCTTAGTGGGGCAAAGTGGTTCTGGT…
Chr01	GmHk_01G000151.6	1584202	1585445	+	ABCB10_1	ABC transporter B family member 10	GO:0005524;GO:0016021;GO:0016887	IPR003593;IPR017871;IPR027417;IPR036640	PF00005	cd03249		(ABC) transporter	V	MTHQMVVTHVLRVYTFCRYGSVLMEKELASFKSIMKAFFVLIVTALAMGETLALAPDLLKGNQMVASVFEVMDRKSGISCEVGEELKTVDGTIELKRINFSYPSRPDVIIFKDFNLRVPAGKSVALVGQSGSGKSSVISLILRFYDPTSGRVLIDGKDITRLNLKSLRRHIGLVQQEPALFATSIYENILYGKEGASDSEVIEAAKLANAHNFISGLPEGYSTKVGERGVQLSGGQRQRVAIARAVLKNPEILLLDEATSALDVESERIVQQALDRLMQNRTTVMVAHRLSTIRNADQISVLQDGKIIDQGTHSSLIENKNGAYYKLVNLQQQQHQL	ATGACTCATCAAATGGTGGTTACCCATGTGCTGAGAGTGTATACCTTTTGCAGGTATGGATCTGTTTTAATGGAAAAGGAGCTTGCTAGCTTTAAATCAATTATGAAGGCATTTTTTGTTTTGATAGTAACAGCACTGGCCATGGGGGAGACATTGGCCCTGGCCCCAGACCTTTTGAAAGGGAATCAAATGGTTGCATCAGTTTTTGAAGTGATGGATAGAAAGTCAGGAATATCATGTGAGGTTGGAGAAGAGTTGAAGACAGTGGATGGAACAATCGAGCTCAAAAGAATCAATTTCAGCTACCCTTCAAGGCCAGATGTAATTATTTTCAAGGATTTCAATCTAAGAGTTCCTGCAGGCAAGAGTGTTGCCTTAGTGGGGCAAAGTGGTTCTGGT…
Chr01	GmHk_01G000152.1	1595205	1597414	+	MYB39_0	Transcription factor MYB39	GO:0003677	IPR009057;IPR017930	PF00249	cd00167		Myblike DNAbinding domain containing protein	K	MGRSPCCEENVGVKKGPWTPEEDEKLIDYISKHGHGSWRTLPKRAGLNRCGKSCRLRWTNYLTPDIKRGKFSEEDERIIINLHSVLGNKWSKIATHLPGRTDNEIKNYWNTHIRKKLLKMGIDPETHKPRTDLNHLMSLSQLLGTSNLSSAMNTTWGNNPLGLQPDITQLAKIQLLQNLLQLMNNYSFVNVGNNPYLLSNPNLNPLFLNGTNLFQTNKEPHVVFSGSEEYANPGLYSQAQSECSQQDVSKSWADLEGGSIPQDTDYNKISNTTTSRENQAENPLPALVAFSTKMGTFNQMDSNIAQTSTESPSNTFFDDWEKLLDDETSGRSYWKEILDLTSTSASPILW	ATGGGAAGGTCACCATGCTGTGAAGAGAATGTTGGTGTAAAGAAAGGGCCATGGACGCCAGAAGAAGATGAGAAGCTGATTGATTATATCAGCAAACACGGCCATGGCAGTTGGAGAACACTTCCAAAGCGTGCAGGTCTCAATAGGTGTGGTAAGAGCTGCAGATTAAGGTGGACAAACTATCTGACGCCTGATATCAAGAGAGGCAAATTCAGTGAAGAAGATGAGAGGATTATCATCAACCTTCATTCAGTTCTCGGAAACAAGTGGTCAAAGATTGCAACCCATCTGCCAGGACGAACCGACAATGAGATCAAGAACTATTGGAACACTCACATAAGGAAAAAGCTTCTGAAGATGGGTATTGATCCAGAAACTCACAAGCCAAGGACAGACTTG…
Chr01	GmHk_01G000153.1	1599682	1600485	+	-	hypothetical protein						NA	S	MKRVLVEVLIDQRNKSNKGDRNGKAITYNSAAQVLSKRFGTQWYGIVSDILSQNGFDWDSTKYMINVENENAWNEYVKSRDEAKQFLFKVIPNWDDIIGLCAKDRATRIEAENALDTNYLMSKEANEEEGIHSMSVDLEESSSATKKKTCTSRSGEKEGIVASINEVASSLKVFAKVTMQKVEIKKQMVIKEAKEMVEEMHNELKNAPYLESGLRQKKKSLID	ATGAAACGTGTATTAGTTGAAGTTCTTATAGACCAAAGGAATAAAAGTAACAAAGGTGACAGAAATGGGAAAGCAATAACATACAATAGTGCAGCTCAAGTTTTGTCTAAGCGTTTTGGAACGCAATGGTATGGAATTGTTAGTGATATTCTTAGTCAAAATGGGTTTGATTGGGATAGTACAAAATACATGATTAATGTTGAAAATGAAAATGCATGGAATGAATATGTCAAGTCACGTGATGAAGCTAAACAATTCCTATTCAAGGTCATTCCTAATTGGGATGATATTATAGGCTTATGTGCCAAGGATAGAGCTACTAGAATTGAAGCAGAGAATGCATTGGATACAAATTATCTCATGAGCAAGGAAGCAAATGAAGAGGAAGGAATTCATAGT…
Chr01	GmHk_01G000154.1	1604351	1605013	-	ITPK5	Inositol-tetrakisphosphate 1-kinase 5		IPR040464;IPR041429	PF05770;PF17927			inositol-tetrakisphosphate 1-kinase	G	MAEEKRFRIGYALLPKKQNSFIRDSLVNLARSRGIDLIRVDPNRSLTDQGPFDCVLHKLYDDDWKRQLTDFTVKYPNVVVLDSPESIERLHNRILMLQVVSELNVDDRSETFGIPKQIVIYDKDTFFDRRNWEALKFLVIAKPLVADGSAKSHKMALVFNHDGLNSLKPPVVVQEFVNHGGVIFKVYVAGERVRCVKWKSLSDVGEDELVRASEDLQRFL	ATGGCGGAGGAAAAACGGTTCCGAATAGGGTATGCGCTGTTGCCGAAGAAGCAAAACAGCTTCATCCGAGACTCGCTCGTGAATCTCGCGAGATCTCGCGGGATAGACCTGATCCGGGTCGACCCGAACCGGAGCCTAACGGATCAAGGTCCATTCGATTGCGTCCTCCACAAGCTCTATGACGACGATTGGAAGCGTCAATTAACGGATTTCACCGTTAAGTACCCTAATGTCGTTGTTCTGGACTCGCCGGAATCGATCGAGAGGCTCCACAACCGGATTTTGATGCTGCAGGTGGTGTCGGAGCTGAACGTCGATGACCGGAGCGAGACGTTCGGGATTCCGAAGCAGATTGTGATATACGACAAGGATACATTCTTCGACCGGCGGAACTGGGAG…
Chr01	GmHk_01G000155.1	1613874	1616442	+	At4g09580_0	putative membrane protein At4g09580		IPR032816	PF09335			Snare associated golgi protein	S	MENEGVNTVVVEQQPVASTSKFPLSFWETTVASTVALVFAVGLLGVYLTMPDSDYSFLKLPRTLQDLQLLRDNLESYTSDYTAQVLVGYCVTFMIPGTVFMSLLAGALFGVFKGVALVVFTATAGASSCYFLSKLIGRPILSSLWPEKLKFFQTQVAKRRKGLLNYMLFLRLTPTLPNTFINFASPIVDVPYHIFFLATVIGLIPAAYVTVKAGLALGELQSVGDLYDFNSIATLFLIGVVSVTPTLMSKNES	ATGGAGAACGAGGGTGTAAACACGGTGGTGGTGGAGCAACAACCTGTGGCATCCACGTCCAAGTTTCCGTTGAGCTTTTGGGAAACCACGGTGGCTTCAACGGTGGCGCTGGTTTTCGCGGTGGGCCTTCTCGGCGTCTACCTCACCATGCCCGATTCCGATTACAGCTTCCTCAAACTCCCTCGTACCCTCCAAGACCTTCAACTCCTACGGGATAACCTTGAGAGCTATACAAGTGACTACACTGCACAAGTCTTGGTGGGGTACTGCGTGACTTTCATGATTCCAGGGACTGTGTTCATGTCATTGCTTGCTGGAGCACTCTTTGGAGTCTTTAAAGGTGTGGCTCTGGTTGTTTTCACTGCCACTGCAGGAGCTTCTTCATGCTATTTCCTGTCT…
Chr01	GmHk_01G000156.1	1619730	1623998	-	RBM34_0	RNA-binding protein 34	GO:0003676	IPR012677;IPR034220;IPR034221;IPR035979	PF00076	cd12394;cd12395		Rna-binding protein	S	MGKKKQKNPQQSSETDAVSTPSSIFSKLFANAPEQTTATAAASLFSDDNPFRRKSAPLSYSTNRTQNPNNGDHPVNTDSSEEKKRKRTKDKTSAPAPDTVSVIEPLEEPGKKRKRDSDEGKDLSVGAEAIGKRKRKRDEVEKEWEEKKYGAVEEGIENKTVGIKRKTLDDPADMMVSKEGFDNEDKLLRTVFVGNLPLKVKKKTLLKEFKKFGEVESVRIRSVPIQDTKKPRKGAILAKKINDAADSVHAYIVFKTEQSAQASLAHNMSLVEGNHIRVDRACPPRKKHKGESTPLYDNKRTVFVGNLPFDVKDEELYKLFCGISNLESSIEAIRVVRDPHLNVGKGIAYVLFKTKEAAKFVVKKRNLKLRDRELRLCHAKADATPSKRPNPSSAHAPST…	ATGGGTAAGAAGAAACAAAAGAACCCGCAACAATCCTCCGAAACCGACGCCGTTTCAACCCCTTCCAGCATTTTCAGCAAACTCTTCGCCAACGCGCCGGAACAGACCACCGCAACCGCCGCTGCCTCTCTATTTTCCGATGACAATCCCTTTCGAAGAAAATCCGCTCCACTTTCTTACTCAACAAACCGCACTCAAAACCCTAACAATGGCGACCACCCCGTGAACACCGATTCCAGCGAGGAGAAGAAGCGGAAGAGGACCAAAGACAAAACCTCAGCCCCAGCCCCCGACACCGTTTCCGTAATCGAACCTTTGGAGGAACCGGGGAAGAAGAGGAAACGCGATTCCGACGAGGGAAAAGACCTTAGTGTGGGTGCAGAAGCGATAGGGAAGAGG…
Chr01	GmHk_01G000157.1	1627809	1628878	-	-	hypothetical protein	GO:0005515	IPR013026				NA	S	MTINHPMHKGCSLNTFIEVRGDRSFPHSNLKSLIKKTMQASLIRTGSVPVQNTVLPGSPRVSLTRQASFSGDKSHAHSPRFSIHSSHSNNRRSSSERDDENFGVRRDLNRTGSPSFSPIVPHEEDFLSDAAPRKLGIRPEDLQFGEGDGGFHRGAPITGGNGGERMKIGAYYEEMLRSNPTDALLLRNYGKFLHEVEKDTVRAEEFYGRAILANPGDGELLSLYGTLIWETQRDEDRAKSYFDQAIHAAPNDCTVLGSYAHFMWEAEEEEEEEEVNGGATEITATEMIVAF	ATGACCATTAACCACCCAATGCATAAAGGGTGTTCGTTGAACACTTTTATAGAAGTGAGGGGTGATCGATCTTTTCCACACTCAAACCTAAAGAGTCTCATAAAAAAAACTATGCAAGCTTCTCTCATCCGAACCGGCTCCGTGCCGGTCCAGAACACGGTTCTCCCCGGTTCACCGCGAGTCTCACTCACGCGCCAAGCCTCCTTCTCCGGCGACAAGAGCCACGCGCATTCTCCCAGGTTTTCAATCCATTCTTCCCACTCCAACAACCGCAGATCCTCGTCGGAGCGCGACGACGAGAATTTCGGCGTTCGCCGGGATCTGAACCGAACCGGATCGCCCTCGTTTTCACCAATCGTACCTCACGAAGAAGACTTCCTCTCCGACGCCGCTCCGCGC…
Chr01	GmHk_01G000158.1	1638775	1641737	+	SNL6_0	Cinnamoyl-CoA reductase-like SNL6	GO:0003854;GO:0006694;GO:0016616;GO:0055114	IPR036291	PF01073	cd08958		Nad-dependent epimerase dehydratase	M	MAPSFDTSTHTVCVMDASGHLGFSLVQRLLQRGYTVHASVQSYGEENLFNGISSDPDKLRVFRSDPFDYHSIIDALRGCSGLFYSFEPPFDQPNYDEYMADVEVRAAHNVLEACAQTETIDKVIFTSSATAVVWREDRKTMELDLDERHWSDVNFCRKFKLWHGVSKTMAEKSAWALAMDRGVNMVSINAGLLMAHDLSVKHPYLRGAAEMYEDGVFVTVDLGFLVDAHICVYEDVSSYGRYLCFNHIINTHDDAVQLARKLTPGASSSLQQSDDYGKSFIEQRINNKKLNKLMVDFEA	ATGGCCCCTTCATTCGACACAAGTACTCATACGGTATGCGTGATGGATGCTTCGGGCCACTTGGGCTTCAGCCTGGTCCAAAGACTCCTCCAAAGGGGCTACACCGTTCATGCCTCCGTTCAATCATATGGGGAAGAAAACCTTTTCAATGGAATTTCATCTGATCCCGATAAGCTTAGGGTTTTTCGATCTGACCCATTTGATTACCATAGCATAATCGATGCTCTCCGAGGTTGCTCTGGTTTGTTCTACTCATTCGAACCTCCCTTTGACCAACCAAATTATGATGAATACATGGCAGACGTGGAAGTAAGAGCAGCACACAACGTGCTGGAAGCATGTGCTCAGACAGAAACTATAGATAAAGTGATTTTCACTTCCTCAGCTACCGCAGTTGTT…
Chr01	GmHk_01G000159.1	1645956	1646367	-	-	hypothetical protein						NA	S	MKLDMMTLKQSLFEAKKIQDETIDDNNRMSTSIEELWVALQDAQKNIITLKTEIRELEEKLDTANKNSRNSSQKDKYWLENKDRSQFETQSSLNVRGNNSTILEDISC	ATGAAGCTTGATATGATGACCTTGAAACAGAGTCTTTTCGAGGCCAAGAAAATCCAGGATGAAACTATAGATGATAATAATAGAATGAGTACATCAATTGAGGAGCTCTGGGTAGCATTGCAGGATGCCCAAAAAAACATCATCACTCTCAAAACAGAAATTAGGGAACTTGAAGAGAAGCTTGATACTGCCAACAAAAACTCTAGAAATTCTTCTCAAAAGGATAAGTACTGGCTGGAAAACAAGGACAGATCACAGTTTGAGACTCAATCTTCCTTGAATGTGCGAGGCAACAACTCTACCATACTGGAGGACATAAGTTGCTGA
Chr01	GmHk_01G000160.1	1647434	1648300	+	ATL29_0	RING-H2 finger protein ATL29		IPR001841;IPR013083	PF13639	cd16461		zinc ion binding	O	MQTTKYDVFARLKANYSETVLPPPPPPPQITPSTLISFTVVVAVVCFVGFSILCFFRCCFVNISSTTLVHLSPNASPFRGLDPSQLQAFPTFLYATVKDLRKEKNQYSLECAICLLEFDHDSMLRLLTVCYHVFHQECIDLWLRSHKTCPVCRTDLDQSPLITNKSPEHQNEDNIVEQEISTDHHHVCIDVKEGDDSEGMQEQKIEFARSHSTGHSIVMVRGEGRHADKYTLRLPENVAFKIVKGGHNYSKSCSSSKDMARLAAPCRNCGYVQTVFQSSSSRSDIKNI	ATGCAAACGACCAAGTACGATGTCTTCGCCAGACTCAAAGCAAACTACTCCGAAACCGTACTTCCGCCACCACCGCCACCGCCACAAATCACCCCGTCGACGCTAATATCCTTCACCGTGGTGGTGGCGGTGGTCTGCTTCGTGGGTTTCAGTATTCTCTGCTTCTTCAGGTGCTGTTTCGTGAACATAAGCTCCACCACCCTCGTTCATCTTTCTCCCAATGCTTCTCCCTTCAGAGGCCTCGACCCTTCACAGCTGCAAGCGTTCCCCACGTTCCTCTACGCCACCGTGAAGGATCTCCGCAAGGAGAAGAATCAGTATTCATTAGAATGCGCCATTTGCTTGTTGGAGTTCGACCATGACAGCATGCTGAGACTCTTAACCGTTTGCTACCATGTT…
Chr01	GmHk_01G000161.1	1653232	1654326	-	Os04g0590900_0	E3 ubiquitin-protein ligase Os04g0590900		IPR001841;IPR013083	PF13639	cd16454		zinc ion binding	O	MASLGNPKSWVPYMNNKDCSQGFCSLYCPQWCYVIYPPPPPFEFPDDDSSPNFSPLVIAVIGVLVSAFLLVSYYTIISKYCGSRESSQSENHEENVELEEDHNPSLHEPWHAPTIGLDEALIKSITVCKYKKGDGLVEVTDCSVCLSEFQDDESVRLLPKCSHAFHLPCIDTWLKSHSSCPLCRASIFTFNAAALHVASPVTEPPSRNDTSSGNQRADENIVAVARDSELDAVEGEVTLTHGGAVSKSALRALSDLGNLRGRHSVIEIRDEGYDSIRRTVSMDHSFQRGSGLSIADVLHVNQEHEGCSNGAGPSKNSRGESSKSSYRRKVLHCVLSPIAMKRSFSSGRFSLSRNGRGRQWVLPV	ATGGCTTCGCTAGGCAACCCAAAAAGTTGGGTTCCATACATGAACAACAAAGACTGTTCTCAAGGATTTTGTAGCTTGTACTGTCCACAGTGGTGCTATGTAATCTACCCTCCTCCTCCTCCCTTTGAATTTCCCGATGATGATTCAAGTCCAAATTTCTCACCTCTAGTTATTGCAGTCATTGGGGTCTTGGTCAGTGCTTTTCTCCTTGTGAGCTACTACACCATAATATCCAAGTACTGTGGCAGCAGAGAATCTTCACAAAGCGAAAACCACGAAGAAAACGTTGAATTGGAAGAGGATCACAACCCTTCACTCCACGAGCCTTGGCATGCTCCAACAATTGGCTTAGATGAGGCTCTGATCAAGTCCATAACGGTTTGCAAGTACAAGAAAGGT…
Chr01	GmHk_01G000162.1	1658456	1662275	-	CP31A_0	ribonucleoprotein, chloroplastic	GO:0003676	IPR012677;IPR035979	PF00076			Rna-binding protein	S	MAATLESAFILFAPQRFSNSHRFSAKAPISIKLHASTSLFFSSKSSFKTGRLCFQLCSTLQEVAATEETPELTQPTDNVKKLYVVNLSWSLTAADINDLFAQSGTVTDVEIIKSKDGRSKGYAFVTMASGEEAQAAVDKFDSYELSGRIIRVELAKRFKKPPSPPPPPGPRPGETRHVIYASNLAWKARSTHLRQLFAENFKTPSSARVVFDSPSGRSAGYGFVSFLTKEDAEAAISTVDGKELMGRPLRLKFSEKKDKAGREKDEDQDKDAGSEEDEDEGSDARPEES	ATGGCGGCTACTTTAGAATCAGCCTTCATCCTCTTCGCACCTCAACGGTTCTCCAATAGCCATCGTTTCTCTGCAAAAGCACCGATCTCCATCAAGCTCCATGCTTCCACCTCCCTTTTCTTCTCTTCCAAGTCCTCCTTCAAAACGGGAAGACTCTGCTTCCAGTTATGCTCCACTTTGCAAGAGGTAGCAGCAACAGAAGAAACACCTGAGCTAACGCAACCAACAGACAACGTAAAGAAGCTGTACGTGGTTAACTTGTCTTGGTCTCTGACGGCGGCAGACATCAATGACCTCTTTGCCCAAAGCGGAACCGTAACCGACGTCGAGATAATAAAGAGCAAAGACGGGAGGAGCAAGGGCTATGCCTTCGTTACTATGGCTTCCGGGGAAGAGGCT…
Chr01	GmHk_01G000163.1	1667319	1679138	+	TRN2_0	Protein TORNADO 2	GO:0016021	IPR018499	PF00335			Tetraspanin family	S	MDCPSITLSILVFHEQLATTLFAKMAMSNNVIGCINFVAVILSIPIIGAGIWLTNGDADSCVQFLQWPVIILGVLILVVALAGFIGAFFRVSWLLIVYLVAMLVLVILLVSLVAFVYMVTLRGHGNIEPNRAYLEYRMDDFSGYLRRRVRSSFKWDRIRSCLSQTNMCAELNQSYRMAQDFFNARLTPMQSGCCKPPTQCAYTFVNPTYWISPINTAADMDCLQWSNDQTQLCYNCDSCKAGLLANLRKEWRRANVILIITVIVLIIVYLVGCCAFRNVKTEDLFRKYKQGYT	ATGGATTGTCCAAGCATCACTCTCTCCATTTTGGTTTTTCATGAACAACTAGCAACCACCCTTTTTGCTAAGATGGCAATGAGCAACAATGTGATCGGATGCATAAACTTCGTGGCCGTGATCCTCTCAATCCCGATCATCGGCGCCGGAATCTGGCTAACAAACGGGGATGCCGATTCATGCGTCCAGTTCCTGCAATGGCCCGTCATCATCCTCGGAGTCCTCATCCTCGTCGTGGCCCTTGCAGGTTTCATCGGAGCCTTCTTCAGAGTCTCGTGGCTCCTCATCGTTTACCTCGTTGCCATGCTCGTCCTCGTCATACTCTTAGTGTCTTTGGTCGCTTTTGTTTACATGGTCACGCTTCGGGGACACGGCAACATCGAACCTAACCGCGCTTAC…
Chr01	GmHk_01G000164.1	1695007	1696706	-	-	hypothetical protein		IPR006734	PF04640			zinc-binding protein	S	MAIENQDTAVREIKPKNRRIMGAGGPDDEDNRWPPWLKPLLKESFFVQCKLHADSHKSECNMYCLDCMNGPLCSLCLAHHKDHRAIQIRRSSYHDVIRVSEIQKVLDITGVQTYIINSARVVFLNERPQPRPGKGVTNTCEVCERSLLDSFRFCSLGCKIVGTSKNFQKRKKQSMAMSSDSEDSYSSNSVHGLKKNCKVQSFTPSTPPPTSVNYRTAKRRKGIPHRAPMVGLIIEY	ATGGCAATTGAAAACCAAGACACCGCTGTCAGAGAAATCAAGCCCAAGAACAGGAGAATCATGGGTGCTGGAGGGCCTGATGATGAGGACAATAGGTGGCCACCGTGGTTGAAGCCACTGCTGAAAGAGAGCTTCTTTGTTCAATGCAAGTTGCATGCTGATTCTCACAAGAGCGAATGCAACATGTATTGCTTGGACTGTATGAATGGCCCTCTCTGCTCTCTCTGCCTCGCCCACCACAAAGATCACCGTGCAATCCAGATTAGGAGGTCCTCATACCATGATGTGATCAGGGTCTCTGAGATTCAGAAGGTGTTGGACATCACTGGTGTCCAAACCTACATTATCAACAGCGCAAGGGTGGTGTTTTTGAACGAGAGGCCTCAACCAAGGCCTGGA…
Chr01	GmHk_01G000165.1	1710601	1711020	-	At1g65750_0	Putative ribonuclease H protein At1g65750	GO:0003676;GO:0004523	IPR012337;IPR036397	PF13456	cd06222		Retrotransposon protein	S	MKDVFGKGNKSACGGVLQDHNVSFICGFGANLGGCLVLIAELKAMMVGLKLAWSRRFQKICVNFDSPLEVELLSEECYMLHPCYNIIREIHLVHKNEREITWNHIYREANKLHMVWLSMLWKMASLVFLNLLLVLFSKL	ATGAAAGATGTTTTCGGAAAAGGGAATAAGTCAGCTTGTGGAGGAGTGTTGCAAGATCACAATGTATCTTTCATTTGTGGGTTTGGTGCTAATCTTGGTGGGTGCTTAGTTCTCATTGCTGAGTTGAAGGCGATGATGGTTGGTCTCAAATTGGCTTGGTCAAGGAGGTTTCAGAAGATTTGCGTGAACTTCGATTCTCCCTTGGAAGTGGAACTTCTTTCTGAAGAGTGTTATATGTTGCACCCTTGTTATAATATCATTAGGGAGATCCATTTAGTCCACAAAAACGAGAGAGAGATTACTTGGAATCATATATATAGAGAAGCCAACAAGTTGCATATGGTTTGGCTAAGCATGCTATGGAAGATGGCTTCACTAGTGTTTTTGAATTTGCTCCTA…
Chr01	GmHk_01G000166.1	1720285	1720933	+	-	hypothetical protein						ribosomal protein L19	J	MTLFFVEASIHNIICFKATMRSFELVSWLKVNFHKSWLGDFGMDSHLVHRYAHLLCPCLSNTLGFLLGLIIGGSVYGKVSWISVGIGLDEVCRPRELKGLGIKNNIKHFNIVLLRKWRWRMMAKRKSLWCLVLKSKYENLDDMSFRRVSHLNFIL	ATGACTCTTTTCTTTGTGGAGGCATCTATACACAATATCATATGCTTTAAGGCAACTATGAGAAGCTTTGAGTTAGTATCATGGCTTAAAGTCAATTTTCACAAAAGTTGGTTGGGTGATTTTGGAATGGATTCTCACCTTGTTCATAGGTATGCTCACTTGTTATGCCCTTGCCTTTCAAATACCTTGGGATTCCTATTGGGACTAATCATAGGAGGGAGTGTGTATGGAAAAGTATCTTGGATAAGCGTAGGAATAGGCTTAGATGAGGTTTGTAGGCCGAGGGAGCTCAAAGGGTTAGGTATAAAGAATAATATTAAACATTTCAATATTGTTTTGCTTAGGAAATGGAGGTGGAGAATGATGGCGAAGAGGAAGTCATTATGGTGTCTTGTCCTA…
Chr01	GmHk_01G000167.1	1727363	1729019	+	-	hypothetical protein						NA	S	MALYLDEEEIWKCPKHPSKRRRSGICHICLRDRLVTLCPDCANVRPCSCYATSSSSSSSSSSSFSRFSGASDSVGRVHNLIEREPGLRRSRSMAIPFLRSRSRFSGGGGGDRVLDLDSARESPAMNGSRSARSFWSMFKSQKSSRHGGGEQEWEAKKILAEERDGDGSINPVMARSRSVAVTAVARVSGDGELRPRTKGKGWFFPSPMKAFRQSKVSKVVQEHSPFTILILVRYGSAGNVEFAICNLEYKYNDRKVIGDNVDCSMPQF	ATGGCGTTGTACCTGGACGAAGAAGAGATTTGGAAGTGCCCGAAGCATCCATCGAAGCGAAGAAGAAGCGGAATTTGCCATATTTGCCTTCGCGACCGTCTCGTAACTCTTTGCCCTGACTGTGCTAACGTGCGCCCCTGTTCCTGCTACGCCACCAGCTCCTCCTCCTCTTCTTCCTCTTCGTCTTCCTTCTCGCGTTTTTCCGGCGCCAGCGACTCCGTCGGCCGCGTCCACAACCTCATCGAGCGGGAGCCAGGGCTGCGACGCTCGCGCTCCATGGCGATTCCGTTTCTCCGATCGAGGTCGCGGTTCTCCGGCGGCGGCGGAGGAGATAGGGTTTTGGATCTCGATAGCGCGAGGGAGTCGCCGGCGATGAACGGAAGCCGGTCGGCGAGGTCG…
Chr01	GmHk_01G000168.1	1739677	1740180	+	At3g02910_0	Putative gamma-glutamylcyclotransferase At3g02910		IPR009288;IPR013024;IPR036568	PF06094	cd06661		Gamma-glutamylamine cyclotransferase	S	MERESEKAKPHLIFAYGTLKRGFPNHYLMEELRSKDDAVLLGSYVTNEPYPLVCGPHGIPYLIKLPGSGHRVKGEVYAVSEEAVVVLDEFEGVSAGYYERLAVTAAEEEGGGKVEAEAYWGHRRFGEVLWKMKGEVGLREYGEKEAREYVRKEDRSGGRNTILDLVP	ATGGAGAGAGAGAGCGAAAAGGCGAAACCGCACTTGATCTTCGCGTACGGCACGTTGAAGCGAGGCTTTCCGAACCACTATCTGATGGAGGAGTTGAGGAGCAAAGACGACGCCGTTTTGCTTGGCAGCTACGTGACGAACGAGCCTTATCCGCTGGTGTGTGGGCCCCACGGGATCCCATACCTGATCAAACTACCCGGGTCGGGGCATCGCGTGAAGGGCGAGGTCTATGCCGTGTCGGAGGAGGCGGTGGTTGTGCTGGACGAGTTCGAAGGCGTGAGCGCGGGGTATTACGAGCGGTTAGCGGTGACGGCGGCGGAGGAGGAGGGAGGGGGGAAGGTGGAGGCGGAGGCGTATTGGGGACACAGGAGATTCGGTGAAGTGTTGTGGAAGATGAAG…
Chr01	GmHk_01G000169.1	1741602	1742604	-	-	hypothetical protein						NA	S	MESQTSTREKESLNLREVPEADKTLGLDMAKGSAFCKMGEGWTCIITKTEGPDAGKVFVKCGENCTCTIEGEAVSQELNLPPDVVSSSGSGAFCKCGEGWSCVIFRTEGPDAGSGKGFAECAGQCSCTIDDKST	ATGGAGTCCCAGACTTCCACACGAGAGAAGGAGTCTCTCAATCTCAGGGAAGTCCCAGAAGCAGATAAAACCTTGGGCTTGGACATGGCCAAGGGCAGCGCATTCTGCAAGATGGGTGAAGGTTGGACATGTATCATAACTAAAACTGAGGGGCCTGATGCTGGCAAAGTTTTCGTTAAATGTGGTGAAAATTGCACCTGTACCATTGAGGGCGAAGCAGTGTCCCAAGAATTGAATTTGCCACCTGATGTTGTGAGCAGCAGTGGCAGTGGAGCATTCTGCAAGTGTGGTGAAGGGTGGAGTTGTGTCATTTTCAGGACTGAAGGCCCTGATGCAGGCTCTGGCAAGGGCTTTGCTGAATGCGCTGGACAGTGTTCTTGTACTATTGATGACAAATCC…
Chr01	GmHk_01G000170.1	1758231	1761774	-	UBP20_1	Ubiquitin carboxyl-terminal hydrolase 20	GO:0006511;GO:0016579;GO:0036459	IPR018200;IPR028889;IPR038765	PF00443			ubiquitin carboxyl-terminal hydrolase	O	MCLSLSSPAMASEEPMDAPPAPNLLSETLSAAELVADLGGDYALFPPGGGSTEFRQLDDDVSSSLWSSALVSNSRVSAVAPESWIAPQGNWLLPENEGSDNAESASEVVPSKMGAGLVNLGNTCFLNAILQCFTHTVPLVQGLRSSTHPIPCSGHKDGFCVICALRIHVERSLAASGGTFSPLEFVNNLKYFSSDFRRYQQEDAHEFMQCTLDKLERCFLGLKKSNLNFEDVNLVEKVFGGRLISKLQCSTCDHTSNTFEPLIDMSLEIDNVDSLPSALESFTKVENIDDNLQCDNCKEEVSMEKQLMLDQTPSVAAFHLKRFKTDGILVEKIDKHIDFPLELDLQPYTIKVMEDPGAENDVPLKYDLYAIVVHTGLSSTSGHYFCFVRSAPDTWHKLD…	ATGTGTCTCTCACTCTCTTCACCAGCTATGGCATCCGAGGAGCCAATGGATGCTCCCCCCGCGCCGAATCTGCTTTCCGAAACCCTAAGTGCCGCCGAATTGGTCGCCGATTTGGGCGGTGATTACGCTCTGTTCCCGCCCGGCGGCGGTTCTACCGAGTTCCGGCAGCTCGACGACGACGTCTCGTCTTCGCTTTGGTCGTCGGCGTTGGTTTCGAATTCGCGCGTCTCCGCAGTGGCGCCGGAATCGTGGATTGCTCCACAAGGAAATTGGCTCTTACCTGAAAATGAAGGTTCAGACAATGCTGAATCTGCCTCTGAAGTCGTGCCTTCTAAGATGGGAGCAGGGCTTGTGAATCTTGGCAATACTTGCTTTCTCAATGCTATTCTGCAATGCTTT…
Chr01	GmHk_01G000170.2	1758231	1761774	-	UBP20_1	Ubiquitin carboxyl-terminal hydrolase 20	GO:0006511;GO:0016579;GO:0036459	IPR018200;IPR028889;IPR038765	PF00443			ubiquitin carboxyl-terminal hydrolase	O	MCLSLSSPAMASEEPMDAPPAPNLLSETLSAAELVADLGGDYALFPPGGGSTEFRQLDDDVSSSLWSSALVSNSRVSAVAPESWIAPQGNWLLPENEGSDNAESASEVVPSKMGAGLVNLGNTCFLNAILQCFTHTVPLVQGLRSSTHPIPCSGHKDGFCVICALRIHVERSLAASGGTFSPLEFVNNLKYFSSDFRRYQQEDAHEFMQCTLDKLERCFLGLKKSNLNFEDVNLVEKVFGGRLISKLQCSTCDHTSNTFEPLIDMSLEIDNVDSLPSALESFTKVENIDDNLQCDNCKEEVSMEKQLMLDQTPSVAAFHLKRFKTDGILVEKIDKHIDFPLELDLQPYTIKVMEDPGAENDVPLKYDLYAIVVHTGLSSTSGHYFCFVRSAPDTWHKLD…	ATGTGTCTCTCACTCTCTTCACCAGCTATGGCATCCGAGGAGCCAATGGATGCTCCCCCCGCGCCGAATCTGCTTTCCGAAACCCTAAGTGCCGCCGAATTGGTCGCCGATTTGGGCGGTGATTACGCTCTGTTCCCGCCCGGCGGCGGTTCTACCGAGTTCCGGCAGCTCGACGACGACGTCTCGTCTTCGCTTTGGTCGTCGGCGTTGGTTTCGAATTCGCGCGTCTCCGCAGTGGCGCCGGAATCGTGGATTGCTCCACAAGGAAATTGGCTCTTACCTGAAAATGAAGGTTCAGACAATGCTGAATCTGCCTCTGAAGTCGTGCCTTCTAAGATGGGAGCAGGGCTTGTGAATCTTGGCAATACTTGCTTTCTCAATGCTATTCTGCAATGCTTT…
Chr01	GmHk_01G000171.1	1780767	1782740	+	MYC2_0	Transcription factor MYC2	GO:0046983	IPR025610;IPR036638	PF00010;PF14215	cd00083		anthocyanin-containing compound biosynthetic process	K	MNLWTDENSSVMEAFMSSSDLSSIWPSPAPPQSTAVFNQDTLQHRLQALIEGARETWTYAIFWQSSYDYSGSTLLGWGDGYYKGDDDKAKAKAKAKVKVTSAAEQDHRKKVLRELNSLISGSSSSSAASDDVDEEVTDTEWFFLVSMTQSFVNGGGLPGQAFFNSAPVWVTGGDRLSASACERARQGHVFGLQTLVCIPSANGVVELGSTELIFQNPDLMNKVKVLFNFSNNNFDMGSSWPATSADQGENDPSSLWLSDPEVRDSINTVAATPSVSVPAQTQGISISKTMQLESSIQTPGSSTLTETPSSIHAIPQNQSVFSRELNFSEYGFDPKTGNNQNHHSLKPESGEILSFGESKRTSYGGVNGNSNSNSHFFSGQSPFVAAADENTNKNNINNN…	ATGAATCTGTGGACGGACGAGAACTCCTCGGTGATGGAGGCCTTCATGTCGTCCTCCGATCTCTCCTCAATCTGGCCCTCGCCGGCGCCGCCGCAATCCACGGCGGTCTTCAATCAGGACACCCTCCAGCATCGCCTGCAGGCCTTGATCGAAGGCGCCCGAGAGACCTGGACCTACGCCATCTTCTGGCAGTCCTCTTATGACTATTCTGGCTCCACTCTCCTCGGCTGGGGCGACGGTTACTACAAAGGCGACGACGACAAAGCCAAAGCCAAGGCCAAGGCCAAGGTCAAGGTCACTTCCGCCGCCGAGCAGGACCACCGCAAAAAAGTTCTCCGCGAACTCAACTCCCTGATCTCCGGCTCCTCCTCCTCCTCCGCCGCCTCCGACGACGTCGAC…
Chr01	GmHk_01G000172.1	1791992	1795205	-	-	hypothetical protein						NA	S	MRYCNVTPILKMENNHSAAGTQDSSMMKSVDQRVRSKARNDIMTRRLKNRERQRRYRARKRLEAETKKSFVVEETPAVQVELQPNRNHNNNNNFVTRIYCKRDWKKDARRAHVFKHQQMNGSIDPPTIISVPEVTCLAIGNKPESVPEREIQSGSSGVVSTDTPRVVLGRRDWKAEARRKKN	ATGAGGTATTGCAATGTTACCCCTATTCTGAAAATGGAAAACAATCATAGTGCAGCTGGAACACAAGATAGTTCTATGATGAAGTCTGTTGATCAAAGAGTACGTTCAAAAGCGCGTAATGACATAATGACTCGACGTCTGAAGAATCGAGAGAGACAACGAAGATATAGGGCACGTAAGCGTCTAGAAGCCGAAACAAAGAAGTCATTTGTTGTAGAAGAGACACCAGCTGTGCAAGTAGAACTACAACCAAACAGGAACCACAACAACAACAACAACTTCGTCACCCGTATCTATTGTAAACGAGATTGGAAAAAGGATGCAAGACGAGCCCATGTTTTTAAGCATCAACAAATGAATGGATCTATTGATCCTCCAACCATAATTAGTGTACCTGAG…
Chr01	GmHk_01G000174.1	1798498	1799454	+	IKU1_0	Protein HAIKU1		IPR008889	PF05678			VQ motif	S	MDNSKNRHNDSLGVNKLGKNIRKSPLHQPNFANNAARQQPQPQVYNISKNDFRDIVQQLTGSPSQDPPPRPPHNPPKPQSMRLQKIRPPPLTPINRPRMPPPMPMPAAPPSVPYNNAIPRPAQFGQPPTPPGDIWSNTTESPISAYMRYLQNSIMDPGQRGNQVQPQPHPYPQPQVPGNVQPHPPPLSALLPNPPIPMYPSLRFNGPVPPMNATNPPVPSLPSPQANGPPPLLPSPTSQFLLPSPTGYMNLLSPRSPYPLLSPGIQFPSPLTPNFPFSSMAQPGILGPGPQPPPSPGLMFPLSPSGFFPISSPRWREH	ATGGATAACTCCAAAAACAGGCATAATGATAGTTTGGGTGTGAATAAGTTGGGGAAAAATATAAGGAAGAGCCCTTTGCACCAGCCCAATTTTGCTAATAATGCTGCTAGGCAACAACCTCAGCCTCAGGTTTACAACATTAGCAAGAACGATTTCAGGGACATTGTTCAGCAGCTTACTGGATCACCCTCCCAGGATCCTCCACCTAGACCTCCACACAATCCACCAAAGCCGCAGAGCATGAGGCTGCAGAAAATTAGGCCTCCCCCGTTAACGCCCATCAATCGGCCTCGCATGCCGCCGCCAATGCCCATGCCTGCTGCCCCTCCTTCCGTTCCGTACAATAATGCCATACCAAGACCTGCTCAGTTTGGACAACCGCCTACTCCGCCTGGGGAT…
Chr01	GmHk_01G000175.1	1812298	1812963	-	PYL1	Abscisic acid receptor PYL1		IPR019587;IPR023393	PF10604	cd07821		abscisic acid receptor	S	MEKAESSASTSEPDSDENHHRHPTNHHINPPSGLTPLEFASLIPSVAEHHSYLVGSGQCSSLLAQRVQAPPDAVWSVVRRFDKPQTYKHFIKSCAVKEPFHMAVGVTRDVNVISGLPAATSTERLDLLDDIRCVTGFSIIGGEHRLRNYRSVTTVHSFEDDADDGKIYTVVLESYVVDVPDGNTEEDTRLFADTVVKLNLQKLASVTEGTNRDGDGKSHSR	ATGGAGAAAGCCGAGAGCTCCGCCTCCACATCGGAGCCAGACTCCGACGAGAACCACCACCGCCACCCGACGAACCACCACATCAACCCTCCCTCCGGCCTCACCCCGCTCGAGTTCGCCTCCCTCATCCCCTCCGTCGCCGAGCACCACTCCTACCTCGTCGGCTCCGGGCAATGCTCCTCACTCCTCGCCCAGCGCGTCCAAGCGCCGCCCGACGCCGTCTGGTCCGTCGTCCGCCGCTTCGACAAGCCCCAAACCTACAAGCACTTCATCAAGAGCTGCGCCGTCAAAGAGCCCTTTCACATGGCCGTCGGCGTCACTCGGGACGTCAATGTCATCTCCGGCCTCCCCGCCGCCACCAGCACCGAACGCCTCGACCTCCTCGACGACATCCGCTGC…
Chr01	GmHk_01G000176.1	1821302	1822817	-	-	hypothetical protein							R	MDSSGSSLPLSHYSTQTSGESSSSQGSKREICYSFPTFNNLPNNGEKGLVPIKTPEISLEKCVSEKQEIKNSCLPKQQVVKNRTKKNEKKCKLATFKTTRLLIYALYWFFLFTAFGSTLSINRHLCGWV	ATGGATTCTAGTGGCAGCTCTCTCCCTTTGTCCCATTATTCCACACAAACTTCTGGGGAGTCTTCGTCCAGCCAGGGTTCCAAGAGAGAAATATGCTACTCATTTCCAACTTTCAACAATCTCCCAAATAATGGAGAGAAAGGATTAGTTCCTATCAAGACACCTGAAATATCCCTGGAAAAATGTGTGAGTGAGAAGCAAGAAATTAAAAACTCGTGCCTTCCTAAGCAGCAGGTGGTGAAGAATAGAACAAAGAAGAATGAAAAGAAATGCAAATTGGCCACATTTAAAACTACTAGGTTGCTGATATACGCTTTATATTGGTTTTTTCTTTTTACTGCTTTTGGCTCCACCCTGAGCATTAATAGACATTTATGTGGTTGGGTTTGA
Chr01	GmHk_01G000177.1	1825202	1826476	-	BOU_1	Mitochondrial carnitine/acylcarnitine carrier-like protein		IPR018108;IPR023395	PF00153			Solute carrier family 25	S	MGDVAKDLTAGTVGGAAQLIVGHPFDTIKVKLQSQPTPLPGQLPKYSGAIDAVKQTVAAEGPRGLYKGMGAPLATVAAFNAVLFTVRGQMEALLRSHPGATLTINQQVVCGAGAGVAVSFLACPTELIKCRLQAQSVLAGTGTAAVAVKYGGPMDVARQVLRSEGGVKGLFKGLVPTMAREVPGNAAMFGVYEALKRLLAGGTDTSGLGRGSLMLAGGVAGAAFWLMVYPTDVVKSVIQVDDYKNPKFSGSIDAFRRISASEGIKGLYKGFGPAMARSVPANAACFLAYEMTRSALG	ATGGGAGATGTGGCAAAGGACCTAACAGCTGGGACTGTTGGAGGGGCAGCACAACTGATAGTTGGACACCCATTTGACACCATCAAGGTCAAGCTCCAGAGCCAGCCAACACCACTCCCCGGCCAGCTTCCCAAGTATTCTGGTGCAATTGATGCTGTCAAGCAGACGGTGGCAGCTGAAGGGCCAAGGGGTTTATACAAGGGTATGGGAGCCCCACTTGCCACAGTAGCTGCCTTCAATGCTGTCCTGTTTACAGTTAGGGGACAAATGGAAGCATTACTGAGGTCGCATCCCGGTGCTACCCTCACAATAAATCAGCAGGTTGTTTGTGGAGCTGGAGCTGGAGTTGCTGTTTCTTTTCTAGCTTGCCCAACTGAATTGATCAAATGCAGATTGCAA…
Chr01	GmHk_01G000177.2	1825202	1826476	-	BOU_1	Mitochondrial carnitine/acylcarnitine carrier-like protein		IPR018108;IPR023395	PF00153			Solute carrier family 25	S	MGDVAKDLTAGTVGGAAQLIVGHPFDTIKVKLQSQPTPLPGQLPKYSGAIDAVKQTVAAEGPRGLYKGMGAPLATVAAFNAVLFTVRGQMEALLRSHPGATLTINQQVVCGAGAGVAVSFLACPTELIKCRLQAQSVLAGTGTAAVAVKYGGPMDVARQVLRSEGGVKGLFKGLVPTMAREVPGNAAMFGVYEALKRLLAGGTDTSGLGRGSLMLAGGVAGAAFWLMVYPTDVVKSVIQVDDYKNPKFSGSIDAFRRISASEGIKGLYKGFGPAMARSVPANAACFLAYEMTRSALG	ATGGGAGATGTGGCAAAGGACCTAACAGCTGGGACTGTTGGAGGGGCAGCACAACTGATAGTTGGACACCCATTTGACACCATCAAGGTCAAGCTCCAGAGCCAGCCAACACCACTCCCCGGCCAGCTTCCCAAGTATTCTGGTGCAATTGATGCTGTCAAGCAGACGGTGGCAGCTGAAGGGCCAAGGGGTTTATACAAGGGTATGGGAGCCCCACTTGCCACAGTAGCTGCCTTCAATGCTGTCCTGTTTACAGTTAGGGGACAAATGGAAGCATTACTGAGGTCGCATCCCGGTGCTACCCTCACAATAAATCAGCAGGTTGTTTGTGGAGCTGGAGCTGGAGTTGCTGTTTCTTTTCTAGCTTGCCCAACTGAATTGATCAAATGCAGATTGCAA…
Chr01	GmHk_01G000178.1	1830812	1831260	-	At5g65687_0	putative sphingolipid transporter spinster 1						major facilitator Superfamily	G	MLNYVDRGAIASNGVNGSLATCTDSGICRGGSGIQWSSIICIYGWTSNCFPIFTTTTTTNHMENGGWWFDTMLDVNIIYAHLGLITSGMTILLKKKKMILGFTICLEEC	ATGCTAAACTATGTGGATCGAGGAGCTATAGCCAGTAACGGCGTCAATGGAAGTCTTGCAACTTGCACTGATTCTGGTATTTGCAGAGGTGGCAGTGGAATTCAATGGAGTTCTATCATCTGCATTTATGGTTGGACTTCTAATTGCTTCCCAATATTTACTACTACTACTACTACCAATCATATGGAAAATGGTGGATGGTGGTTTGATACTATGTTGGATGTGAATATCATATATGCACATTTGGGGCTGATCACAAGTGGTATGACAATCCTGTTGAAAAAGAAAAAAATGATATTGGGCTTTACGATATGTTTGGAAGAGTGCTGA
Chr01	GmHk_01G000179.1	1833750	1842800	-	SS4_1	putative starch synthase 4, chloroplastic/amyloplastic		IPR013534	PF08323			starch synthase activity	G	MGTLFFFHSPIPHFSLPSMPKPIALPPLSCLRNNGDVNSLHEQKSEGNKNVDMSQSMCDDDQNVKQDNIWQLFKEAQQNILYLNKQRLGAIEKLDKTNREKQSLLSKIKKLEAEKQAGAGKDNLSTCSELLLRIDAMVLSSMISAGEASELRSLVMNHKVSLADVFNIISHKKDPELLGELRRFSDGHKKNGFHIVHICTEMTPLVPRGSVASYVTGISRALQRKGHLVEVILPKYASLNLDEVQGLHEVNVEVTSYFNGQLHGNRIWTGVVFGIGVTLIEPKYYSSFFSHEMIYGYPDDFERFSYFCRASLDYIVKCGKQPDVLHLHNWETAIVGPLFWDTFVKQGIEQPDKLALCGLDPLRLHRPDRLQDNTNTQLVNILKGGVVYSNRVVIMSSIY…	ATGGGGACATTGTTTTTCTTCCATTCACCGATTCCTCACTTTTCACTCCCTTCCATGCCAAAACCCATTGCACTTCCTCCTCTTTCTTGTTTGAGGAATAATGGAGATGTCAATAGCTTACATGAACAGAAGTCAGAGGGTAACAAAAATGTGGACATGTCCCAGTCCATGTGTGATGATGACCAGAATGTGAAACAAGATAATATTTGGCAATTGTTCAAAGAAGCTCAACAGAACATACTATACTTGAACAAACAACGCCTTGGGGCCATTGAGAAACTTGACAAAACAAACAGAGAAAAACAGTCGCTTCTCAGTAAGATAAAGAAGTTGGAAGCAGAAAAACAGGCTGGTGCTGGTAAAGATAACCTATCAACTTGTTCAGAATTGCTGCTTCGG…
Chr01	GmHk_01G000179.2	1833750	1842800	-	SS4_1	putative starch synthase 4, chloroplastic/amyloplastic		IPR013534	PF08323			starch synthase activity	G	MGTLFFFHSPIPHFSLPSMPKPIALPPLSCLRNNGDVNSLHEQKSEGNKNVDMSQSMCDDDQNVKQDNIWQLFKEAQQNILYLNKQRLGAIEKLDKTNREKQSLLSKIKKLEAEKQAGAGKDNLSTCSELLLRIDAMVLSSMISAGEASELRKMTPLVPRGSVASYVTGISRALQRKGHLVEVILPKYASLNLDEVQGLHEVNVEVTSYFNGQLHGNRIWTGVVFGIGVTLIEPKYYSSFFSHEMIYGYPDDFERFSYFCRASLDYIVKCGKQPDVLHLHNWETAIVGPLFWDTFVKQGIEQPDKLALCGLDPLRLHRPDRLQDNTNTQLVNILKGGVVYSNRVVIMSSIYPKHVIVHNLSHELEPTLNVHRDKLVIAPYGLDKSTWDPSTDYFLPENF…	ATGGGGACATTGTTTTTCTTCCATTCACCGATTCCTCACTTTTCACTCCCTTCCATGCCAAAACCCATTGCACTTCCTCCTCTTTCTTGTTTGAGGAATAATGGAGATGTCAATAGCTTACATGAACAGAAGTCAGAGGGTAACAAAAATGTGGACATGTCCCAGTCCATGTGTGATGATGACCAGAATGTGAAACAAGATAATATTTGGCAATTGTTCAAAGAAGCTCAACAGAACATACTATACTTGAACAAACAACGCCTTGGGGCCATTGAGAAACTTGACAAAACAAACAGAGAAAAACAGTCGCTTCTCAGTAAGATAAAGAAGTTGGAAGCAGAAAAACAGGCTGGTGCTGGTAAAGATAACCTATCAACTTGTTCAGAATTGCTGCTTCGG…
Chr01	GmHk_01G000180.1	1846308	1852952	-	PCKA_1	Phosphoenolpyruvate carboxykinase (ATP)	GO:0004611;GO:0004612;GO:0005524;GO:0006094;GO:0017076	IPR008210;IPR013035;IPR015994	PF01293	cd00484		Phosphoenolpyruvate Carboxylase	C	MASNGNGSVANGNGSARNGLAKIQTQKKHDGICHDDSGPTVKAQTIDELHSLQKKKSAPTTPVTGFQAPFATLTEEERHKQQLQSISASLASLTRETGPKLVKGDPARKSDTQKVTHVHHHVSTPTIVVSDSSLKFTHVLYNLSPAELYEQAIKYEKGSFITSTGALATLSGAKTGRSPRDKRVVKDDLTENELWWGKGSPNIEMDEHTFMVNRERAVDYLNSLDKVFVNDQFLNWDTENRIKVRIVSARAYHSLFMHNMCIRPTPEELENFGTPDFTIYNAGQFPCNRYTHYMTSSTSIDLNLARREMVILGTQYAGEMKKGLFGVMHYLMPKRQILSLHSGCNMGKDGDVALFFGLSGIVSADHRLNRYNVAPHTYPTICTGKTTLSTDHNRYLIGD…	ATGGCGTCGAACGGGAATGGCAGCGTTGCGAACGGTAACGGGAGCGCTAGGAACGGACTTGCGAAGATTCAGACGCAGAAGAAGCATGACGGGATTTGTCACGACGACAGCGGTCCAACGGTGAAGGCTCAGACCATTGACGAGCTTCACTCGCTGCAGAAGAAGAAATCCGCACCCACCACCCCCGTTACGGGGTTTCAGGCTCCTTTCGCCACCCTCACCGAAGAAGAACGTCATAAGCAACAACTCCAATCCATCAGTGCATCTCTGGCATCACTGACCAGAGAAACTGGACCGAAACTGGTGAAGGGAGACCCAGCTAGGAAGTCAGATACCCAGAAGGTTACTCACGTGCACCATCATGTCAGCACTCCCACCATTGTTGTCAGCGACAGTTCT…
Chr01	GmHk_01G000180.2	1846308	1852952	-	PCKA_1	Phosphoenolpyruvate carboxykinase (ATP)	GO:0004611;GO:0004612;GO:0005524;GO:0006094;GO:0017076	IPR008210;IPR013035;IPR015994	PF01293	cd00484	TIGR00224	Phosphoenolpyruvate Carboxylase	C	MASNGNGSVANGNGSARNGLAKIQTQKKHDGICHDDSGPTVKAQTIDELHSLQKKKSAPTTPVTGFQAPFATLTEEERHKQQLQSISASLASLTRETGPKLVKGDPARKSDTQKVTHVHHHVSTPTIVVSDSSLKFTHVLYNLSPAELYEQAIKYEKGSFITSTGALATLSGAKTGRSPRDKRVVKDDLTENELWWGKGSPNIEMDEHTFMVNRERAVDYLNSLDKVFVNDQFLNWDTENRIKVRIVSARAYHSLFMHNMCIRPTPEELENFGTPDFTIYNAGQFPCNRYTHYMTSSTSIDLNLARREMVILGTQYAGEMKKGLFGVMHYLMPKRQILSLHSGCNMGKDGDVALFFGLSGTGKTTLSTDHNRYLIGDDEHCWGDNGVSNIEGGCYAKCI…	ATGGCGTCGAACGGGAATGGCAGCGTTGCGAACGGTAACGGGAGCGCTAGGAACGGACTTGCGAAGATTCAGACGCAGAAGAAGCATGACGGGATTTGTCACGACGACAGCGGTCCAACGGTGAAGGCTCAGACCATTGACGAGCTTCACTCGCTGCAGAAGAAGAAATCCGCACCCACCACCCCCGTTACGGGGTTTCAGGCTCCTTTCGCCACCCTCACCGAAGAAGAACGTCATAAGCAACAACTCCAATCCATCAGTGCATCTCTGGCATCACTGACCAGAGAAACTGGACCGAAACTGGTGAAGGGAGACCCAGCTAGGAAGTCAGATACCCAGAAGGTTACTCACGTGCACCATCATGTCAGCACTCCCACCATTGTTGTCAGCGACAGTTCT…
Chr01	GmHk_01G000181.1	1894304	1897274	-	IAA8_0	Auxin-responsive protein IAA8	GO:0005515	IPR033389	PF02309			auxin-responsive protein	K	MMSPPAVVTEEEGRSNVSSTVASGSSQSLDRFSQNGAGLKERNYLGLSDCSSVDSSASTVPSLCDEKKENMNLKATELRLGLPGSQSPEREPDLFSLSPAKLDEKPLFPLLPTKDGICLSAQKTVVSGNKRGFADTMDGFSQGKFAGNTGMNAMLSPRPSGAQPSAMKEIPSKLQERPCSTKNGTGHNHTGASISGSAPASKAQVVGWPPIRSFRKNSMATTTNKNNDEVDGKPGVGALFVKVSMDGAPYLRKVDLRSYTTYQELSSALEKMFLSCFTLGQCGSHGAPGREMLSESKLRDLLHGSEYVLTYEDKDGDWMLVGDVPWEMFIDTCKRLKIMKGSDAIGLVCLSRFSCLSSQGHGKVQKQELGYPGLLVV	ATGATGTCGCCGCCGGCGGTGGTAACGGAGGAGGAGGGGCGGAGCAACGTGTCGTCGACCGTGGCGTCCGGTTCTTCGCAATCCTTGGACCGTTTCTCTCAGAATGGGGCTGGATTGAAAGAACGAAATTACTTAGGGTTATCTGATTGCTCATCAGTTGATAGCAGTGCCTCTACTGTGCCAAGCTTGTGTGATGAGAAAAAGGAGAACATGAATTTGAAGGCTACAGAGTTGAGGCTGGGTCTTCCCGGATCCCAATCGCCTGAAAGGGAGCCGGATCTTTTCTCTTTAAGCCCAGCAAAGCTTGATGAGAAGCCACTGTTCCCTTTGCTTCCTACTAAAGACGGGATTTGCTTGTCGGCGCAAAAAACTGTTGTTTCTGGCAACAAAAGAGGTTTT…
Chr01	GmHk_01G000182.1	1913292	1913871	+	At5g65660_0	Uncharacterized protein At5g65660						hydroxyproline-rich glycoprotein	S	MEGQDLSPPRMDTSRPSLGFPLGTALLLIIIFSLSGIFSCCYHWDKLRSFRQSLSHPHPAPSHTQSQPYTEVKQSKGESLPVLMPGDEVPKFIAMPCPCQPSRLETIVVTVEKPPHKPPLVVAPLC	ATGGAGGGCCAAGATCTCTCGCCACCTCGCATGGACACATCTCGACCGTCCCTCGGCTTCCCCTTGGGCACTGCCCTCCTCTTGATCATCATCTTCAGCCTCAGCGGCATCTTCTCTTGTTGCTACCACTGGGACAAGTTACGCTCCTTCCGTCAATCTCTCTCTCATCCCCACCCTGCTCCCTCCCACACCCAATCCCAACCCTACACGGAGGTGAAGCAAAGCAAGGGTGAGAGTTTGCCGGTGTTGATGCCTGGGGATGAAGTGCCTAAGTTCATAGCCATGCCTTGCCCGTGCCAACCTTCCCGGCTGGAGACTATCGTTGTCACCGTCGAGAAGCCGCCGCACAAACCGCCGCTCGTGGTGGCGCCTTTGTGTTAA
Chr01	GmHk_01G000183.1	1920396	1927366	+	-	hypothetical protein						Retrotransposon protein	L	MRLRTASGDVVPINLEIEATCRRNNAARRRREQDTEGSRWRNQGNQYKEQRNQQPYQPPYQHPSQGPNQQDKPTNIEELLLQFIQETRSHQKSTDATIRNLEVQMGQLAQDKAERPTRTFGANTEKNPKEECKAVLTRGQRKAQEEGKMTSRKRRAVPTPGEASNWDTSRFTSEIAWHRYQDNIQLRNILPERNVELGPGMFDEFLQELRRRRWDQVLTHLPEKRIDVALVKEFYSNLYDPEDHSPRFCRVRGQVVRFDADTINDFLDTPVILEDGEEYTAYTRYLSTHPILTPSRPHCALQGGALSLMLMVSPGSS	ATGCGACTTAGGACTGCATCTGGAGACGTGGTCCCTATCAACTTGGAAATCGAAGCCACTTGTCGGCGTAACAATGCTGCAAGAAGAAGAAGGGAACAGGACACTGAAGGAAGCAGGTGGAGGAATCAGGGAAACCAGTACAAGGAGCAGAGGAATCAACAACCGTACCAACCGCCATACCAGCATCCTAGCCAGGGCCCCAATCAGCAAGACAAGCCCACCAACATAGAAGAGCTCTTGCTGCAATTCATCCAGGAGACACGGTCCCATCAGAAGAGCACGGATGCAACCATTCGGAATCTGGAAGTTCAAATGGGCCAATTGGCACAAGACAAAGCTGAAAGACCCACTAGAACTTTCGGGGCTAACACAGAGAAGAATCCAAAAGAAGAATGCAAG…
Chr01	GmHk_01G000184.1	1937415	1939647	+	-	hypothetical protein	GO:0003677	IPR009057		cd00167		NA	S	MPARNFSVHTPRRSPRFLPQQNHDTPNPKSAKLSVSANKSEKCAVGSRRSPRLNNVEEQSPPLRRSPMLNNEPVGKQLKGTRVKKGGVTATKENRVVSDEGFGGGRKKERNRKRVEVETQESVVSDEGFGGGIKKERNRKRVEVGTQENGVVSDEGFGGGRKKERNWKRVKVKTKENRVVLDEGIGGGAKKEENGKRVKTKANRVVSDEGFGGGRKKGENGEKRKRGGEEISKGWTKEQELALQRAYFAAKPSPHFWKNVSKLVPGKSQQDCFDRIHCDYMTPPQTQPHSRAKTLKSSPIHQFSISASKLLKPIDKTVRKSNVLKPKNIITQKSIEKLLQHHLKVDLDREVDIFSVLEPNTDFSTNALQPSEALSTPKQQKENKGFLQNCTETSSSSHK…	ATGCCAGCCAGAAACTTCTCCGTCCACACCCCACGAAGGTCACCCAGGTTCCTCCCCCAACAAAACCACGACACTCCCAACCCCAAATCTGCGAAACTCAGCGTTTCTGCCAACAAATCGGAGAAGTGCGCTGTTGGGTCGAGAAGATCTCCGAGGCTGAACAACGTTGAAGAACAATCTCCCCCTCTGAGACGATCTCCCATGTTGAACAACGAGCCAGTCGGTAAACAATTGAAAGGCACTAGAGTGAAGAAGGGTGGTGTAACTGCAACGAAGGAAAATCGTGTCGTTTCGGACGAGGGTTTTGGTGGAGGAAGAAAGAAGGAGAGAAACAGGAAGAGGGTTGAAGTGGAAACGCAAGAAAGTGTCGTTTCGGACGAGGGGTTTGGTGGAGGAATA…
Chr01	GmHk_01G000185.1	1948761	1950195	-	BHLH93_0	Transcription factor bHLH93	GO:0046983	IPR036638	PF00010	cd00083;cd04873		Transcription factor	K	MELSQLGFLDELLAPRKDTTWSNALSTGLNELLLPSGWSFDSFDENQGLATLNPSFAAFSTPLDHRFECPYGSEAAYPFVDGFTLPELDSSYTRNDESAPLLPQEDNPSLEDEEFGFLGRDNQSLEQAKIGCKIEEQVTEIPVFNMGLCGEKKPKSKKLEGQPSKNLMAERRRRKRLNDRLSMLRSIVPKISKMDRTSILGDTIDYMKELLERIGKLQEEEIEEGTNQINLLGISKELKPNEVMVRNSPKFDVERRDQDTRISICCATKPGLLLSTVNTLEALGLEIHQCVISSFNDFSMQASCSGAAEQRNCMNQEEIKQALFRNAGYGGRCL	ATGGAGCTTTCTCAACTTGGTTTTCTGGATGAGCTACTTGCTCCAAGAAAAGACACTACTTGGAGTAATGCTTTGTCAACTGGGTTGAATGAGTTACTACTCCCTAGTGGTTGGAGCTTTGACTCTTTTGATGAGAACCAAGGTTTAGCTACTTTGAATCCCTCATTTGCTGCATTTTCCACTCCACTAGACCACAGATTTGAATGCCCTTATGGAAGTGAAGCAGCATACCCTTTTGTTGATGGCTTCACATTGCCTGAGCTTGATTCTTCATACACCAGGAATGATGAGTCAGCACCACTTTTGCCACAAGAGGATAACCCATCATTGGAGGATGAAGAGTTTGGCTTTCTGGGAAGGGATAACCAGAGCTTGGAACAAGCAAAAATTGGCTGCAAA…
Chr01	GmHk_01G000186.1	1975886	1980967	-	GRDP1_0	Glycine-rich domain-containing protein 1		IPR009836	PF07173			Protein of unknown function (DUF1399)	S	MEPQQEMEWNEAQKIPISVDLEVVAKKQLQFLATVDKNRHLYDGPALDRAIYRYNACWIPLLAKHSESPIFEGPLVVPLDCEWIWHCHRLNPVRYKTDCEELYGRVLDNFGVATTVEGICGWQTEEIWNKLYPDEPYNADLVNLLPEDISKRISKLEKYTKYDLISAAKRQSPFFYQVSRTHMKNDLFIKEAVARYKGFLHLIKRNKEKGIKRFCVPTYDIDLIWHSHQLHPVAYCKDLNEALGKVLEHDDTDSDRTKGKKLDLGFSGTTRQWEVTFGTRYWKAGAMYRGNAPSPITSNPFPSSITCKKVVSSNEYPQEISLPDRKVMEVLLEFIGVKNLPEGQEGDLCVLFSKSQPDAFFDAKRRLSILSVSREKQVASFRCEPTGELLFELMSSSSS…	ATGGAACCACAACAAGAAATGGAGTGGAATGAGGCCCAAAAGATTCCAATAAGCGTGGACCTTGAGGTCGTAGCAAAAAAACAGCTTCAGTTCCTTGCAACTGTTGATAAGAACCGTCACCTCTATGACGGTCCTGCCCTTGACAGAGCTATCTATAGGTACAATGCTTGTTGGATTCCCTTGCTTGCCAAGCATTCCGAGTCTCCGATTTTTGAAGGGCCATTGGTAGTTCCTCTTGACTGTGAATGGATTTGGCACTGTCACAGGCTCAACCCGGTAAGGTACAAAACTGACTGTGAGGAACTTTATGGACGGGTACTTGACAACTTTGGTGTTGCCACTACTGTTGAAGGAATTTGTGGCTGGCAAACTGAAGAAATCTGGAATAAATTGTATCCT…
Chr01	GmHk_01G000187.1	1984137	1988530	-	At4g37920_0	Uncharacterized protein At4g37920						NA	S	MKGYKVWTSTFNSSTTTTFIPFNNNLSPNYPLTPPSYTASNCFPSFQSQRPKLIAQNFKPHILLCTSLPSPQASSASTAQAEEHEVEIAKGYTMTQFCDKMIDFFLNEKTKSKEWRKYLIFREEWKKYRDRFYNRCQRRADMENDPVMKEKFISLRRKLKKIDDEMEGHYELLMEIQDSPMDINAIVARRRKDFTGEFFHYLSLISDTYDSLEDRDGISRLGSRCLSAVSAYDNTLENIETLDAAQAKFDDILNSPSIDIACQKIKSLAKAKELDSSLILLISSAWAKAKESTTMKNEVKDIMYQLYRATKSSLRSITPKEIKLLKHLLNIIDPEERFSALATAFTPGDEHEAKDPNALYTTPKELHKWIKIMLDAYHLNKEETDLREARQMTDPVVIQ…	ATGAAAGGCTACAAGGTTTGGACCTCAACCTTCAACAGCAGCACCACCACCACCTTCATCCCTTTCAATAATAATCTCTCCCCAAATTACCCGTTAACCCCTCCATCCTATACTGCTTCAAACTGCTTCCCATCCTTCCAAAGCCAAAGACCAAAACTTATAGCTCAGAATTTCAAACCCCACATTCTTCTATGCACCTCTCTGCCCAGTCCACAGGCAAGCAGTGCTTCCACAGCTCAAGCTGAGGAGCATGAGGTTGAAATTGCAAAGGGTTACACTATGACACAATTTTGTGACAAAATGATAGATTTCTTTTTGAATGAAAAAACGAAATCAAAAGAATGGAGGAAGTACCTGATATTTAGAGAGGAGTGGAAAAAATACAGGGATAGATTTTAC…
Chr01	GmHk_01G000188.1	1995431	1999144	+	ABCG17	ABC transporter G family member 17	GO:0005524;GO:0016020;GO:0016887	IPR003593;IPR013525;IPR017871;IPR027417	PF00005;PF01061			(ABC) transporter	V	MTQANGHRRVDQTVIDIKKPPVSFTGGLVFECLTYTVTKKKKVEEKWSNQEVDLLHEITSYAPKGCITAVMGPSGAGKSTLLDGLAGRIASGSLKGRVSLDGATVSASLIKRTSAYIMQEDRLFPMLTVYETLMFAADFRLGPLSLADKKQRVEKLIDQLGLTSSRNTYIGDEGTRGISGGERRRVSIGVDIIHGPSLLFLDEPTSGLDSTSAHSVIEKVHDIARGGSTVILTIHQPSSRIQLLLDHLIILARGQLMFQGSPQDVALHLSRMPRKIPKGESPIELLIDVIQEYDQSEVGVEALAEFARTGVKPPPLSGQQQHSVSSVAPSSHLSHRYEENSQDLSYSSQVSRRVVDGFDHSLRSSHNNNTSMSWSTGNSAAFLKFTPSRLKNDHKLQNT…	ATGACTCAAGCCAATGGCCACCGTCGTGTTGATCAAACAGTGATTGACATAAAGAAACCGCCGGTGAGCTTCACCGGGGGTCTGGTGTTCGAGTGCCTCACTTACACCGTTACAAAGAAGAAGAAGGTTGAGGAGAAGTGGTCGAATCAAGAGGTGGACCTGCTGCATGAAATCACTAGCTATGCACCAAAGGGTTGCATCACTGCAGTGATGGGCCCTAGTGGCGCAGGAAAGTCCACTCTCTTGGATGGCCTTGCTGGGAGGATTGCGAGTGGGAGCCTCAAAGGGAGGGTCTCCTTGGATGGGGCAACTGTGAGTGCAAGCTTGATCAAGAGAACTTCTGCATATATCATGCAGGAAGATAGGCTTTTCCCAATGCTAACTGTCTATGAGACTTTG…
Chr01	GmHk_01G000189.1	2004932	2011444	+	NORK_2	Nodulation receptor kinase	GO:0004672;GO:0004713;GO:0005524;GO:0006468	IPR001245;IPR011009;IPR013210;IPR017441;IPR020635;IPR024788;IPR032675	PF07714;PF08263;PF12819			nodulation receptor	T	MIQVLQPNGVTSLSDYDGVTRYLDIKTGCGISASGSATEGFENIACCADSNYTDPQTTLNYTTDYRWFPDKGSCRRTKDVLNEKVRLFFVDEGKRCYNLPTIKNKVYLIRGTFPFNGVNSSFNVSIGVTQLGAVRSSGLQDLEIEGIFRATKDYIDFCLVKGEVDPFISQLELRPLPEEYLHDLPASVLKLISRNSFWGTKDEIRFPTDPSDRIWKATSSSLSALLLSSNVSNFDLKSNVTPPLQVLQTAVTHPDRLQFVLSGLDIEDNEYRVFLYFLELNSTVKAGKRVFDIYVNGEIKKERFDILAGGSNYTYTVLNVSANGLLNLTLVKASGAEFGPLLNAYEVLQMRSWIEETNQKDVEGIQKIREELLLQNQDNKALESWTGDPCFFPWQGITC…	ATGATTCAAGTTTTACAGCCCAATGGGGTAACCTCTCTTTCAGATTATGATGGAGTTACCAGATATTTGGATATTAAGACTGGTTGTGGCATATCGGCTTCTGGCTCTGCAACTGAAGGCTTTGAAAACATAGCATGCTGTGCTGATTCAAACTACACAGATCCCCAAACCACCTTAAATTACACAACAGATTACAGATGGTTCCCTGATAAAGGAAGTTGCAGAAGAACTAAAGATGTGTTAAATGAAAAAGTTCGACTGTTTTTTGTAGATGAAGGAAAGAGATGTTACAACTTGCCAACAATTAAGAATAAAGTATATCTGATAAGGGGCACATTTCCATTCAACGGTGTAAATTCTTCCTTTAATGTCTCAATTGGGGTAACACAGTTAGGTGCA…
Chr01	GmHk_01G000189.2	2004932	2012552	+	NORK_2	Nodulation receptor kinase	GO:0004672;GO:0005524;GO:0006468	IPR008271;IPR011009;IPR013210;IPR017441;IPR024788;IPR032675	PF00069;PF08263;PF12819			nodulation receptor	T	MIQVLQPNGVTSLSDYDGVTRYLDIKTGCGISASGSATEGFENIACCADSNYTDPQTTLNYTTDYRWFPDKGSCRRTKDVLNEKVRLFFVDEGKRCYNLPTIKNKVYLIRGTFPFNGVNSSFNVSIGVTQLGAVRSSGLQDLEIEGIFRATKDYIDFCLVKGEVDPFISQLELRPLPEEYLHDLPASVLKLISRNSFWGTKDEIRFPTDPSDRIWKATSSSLSALLLSSNVSNFDLKSNVTPPLQVLQTAVTHPDRLQFVLSGLDIEDNEYRVFLYFLELNSTVKAGKRVFDIYVNGEIKKERFDILAGGSNYTYTVLNVSANGLLNLTLVKASGAEFGPLLNAYEVLQMRSWIEETNQKDVEGIQKIREELLLQNQDNKALESWTGDPCFFPWQGITC…	ATGATTCAAGTTTTACAGCCCAATGGGGTAACCTCTCTTTCAGATTATGATGGAGTTACCAGATATTTGGATATTAAGACTGGTTGTGGCATATCGGCTTCTGGCTCTGCAACTGAAGGCTTTGAAAACATAGCATGCTGTGCTGATTCAAACTACACAGATCCCCAAACCACCTTAAATTACACAACAGATTACAGATGGTTCCCTGATAAAGGAAGTTGCAGAAGAACTAAAGATGTGTTAAATGAAAAAGTTCGACTGTTTTTTGTAGATGAAGGAAAGAGATGTTACAACTTGCCAACAATTAAGAATAAAGTATATCTGATAAGGGGCACATTTCCATTCAACGGTGTAAATTCTTCCTTTAATGTCTCAATTGGGGTAACACAGTTAGGTGCA…
Chr01	GmHk_01G000189.3	2011446	2012552	+	NORK_2	Nodulation receptor kinase	GO:0004672;GO:0005524;GO:0006468	IPR001245;IPR011009	PF07714			nodulation receptor	T	MCAKVADFGFSKYAPQEGDSNVSLEVRGTAGYLDPEYYKTQQLSEKSDVFSFGVVLLEIVSGREPLDIKRPRNEWSLVEWAKPYIRVSKMDEIVDPGIKGGYHAEAMWRVVEVALQCLEPFSAYRPNMVDIVRELEDALIIENNASEYMKSIDSLGGSNRYSIVIEKRVLPSTSSTAESTITTQALSHPQPR	ATGTGTGCTAAGGTTGCCGATTTTGGTTTCTCAAAATATGCTCCTCAGGAAGGAGACAGTAATGTTTCCCTTGAAGTAAGAGGAACTGCAGGGTACCTGGATCCTGAGTACTACAAAACCCAGCAATTGTCTGAGAAGAGTGATGTTTTCAGCTTTGGCGTGGTTTTACTTGAAATTGTGAGCGGCAGGGAACCTCTCGACATAAAGAGGCCACGGAACGAGTGGAGCTTGGTTGAATGGGCTAAGCCATACATTAGAGTATCAAAGATGGATGAAATTGTGGATCCTGGCATCAAGGGAGGATACCATGCAGAGGCAATGTGGAGAGTAGTGGAAGTAGCCCTGCAATGTCTTGAACCCTTCTCAGCATATAGACCAAACATGGTTGACATTGTCCGG…
Chr01	GmHk_01G000190.1	2014825	2015282	-	BRK1_0	Protein BRICK 1	GO:0007015;GO:0031209;GO:0044877					BRICK1, SCAR WAVE actin-nucleating complex subunit	S	MARAGGITNAVNVGIAVQADWENREFISHISLNVRRLFDFLVQFEATTKSKLASLNEKLDVLERRLELLEVQVGNASANPSLFAT	ATGGCTCGCGCAGGAGGGATAACAAACGCAGTGAACGTGGGAATCGCAGTGCAAGCCGATTGGGAGAACCGCGAATTCATCTCTCACATTTCTCTCAACGTTCGTCGCCTCTTCGACTTCCTCGTCCAATTCGAGGCTACGACGAAGAGCAAGTTGGCGTCTTTAAATGAGAAGCTGGATGTGTTGGAGCGGAGATTGGAGCTGCTTGAAGTTCAAGTGGGCAATGCTTCGGCCAACCCTTCTCTTTTTGCCACATGA
Chr01	GmHk_01G000191.1	2016658	2024653	-	OOP_0	Organellar oligopeptidase A, chloroplastic/mitochondrial	GO:0004222;GO:0006508;GO:0008233	IPR024077;IPR034005	PF01432	cd06456		oligopeptidase a	E	MRRSSLVGALLIANMLMATRLTLTLPFSSSIPPLLNRTYRSLSHLKQFPKSHPCPLWSSSFSFCLHTLRKSTSPLRASSSLSTPSMAASSLDEGNPLLQNFVFPPFDVVEPKHVRPGIRALLGKLEHELEELERSVEPSWPKLVEPLEKIIDQLSVVWGMVNHLKAVKDSSELRSAIEDVQAEKVKFQLRLGQSKPIYNAFKAIQESPNWQTLSDARKRIVESQIKEAVLNGVSLEDDKRESFNKIEQELEKLSQKFGENVLDATKKFEKLITDKTEIEGLPATALGLAAQSAVSKGHENATAENGPWIITLDAPSFIAVMQHARNRSLREEIYRAYVSRASSGDLDNTGIIDQILKLRLEKAKLLNYNNYAEVSMATKMATVDKAEELLEKLRRSSWD…	ATGAGACGGTCATCTCTAGTGGGTGCCCTTCTTATAGCAAACATGCTAATGGCAACACGCCTTACCCTCACTCTCCCTTTCTCTAGCTCAATCCCTCCACTCTTAAACCGCACTTATCGTTCCCTTTCACACCTCAAACAATTCCCAAAATCCCACCCTTGTCCCCTCTGGTCCTCTTCCTTCTCCTTCTGCCTCCACACACTCCGCAAGTCCACTTCCCCTCTTCGCGCTTCTTCCTCCCTTTCTACTCCCTCCATGGCTGCGTCTTCATTAGACGAAGGCAATCCTCTTCTGCAGAATTTCGTGTTCCCACCCTTCGATGTCGTTGAGCCCAAACACGTGCGACCCGGCATTCGCGCCCTCCTCGGCAAGCTGGAACATGAATTGGAGGAACTCGAA…
Chr01	GmHk_01G000193.1	2040116	2040442	+	-	hypothetical protein						NA	S	MSNSTQMEKDLTMTVQRSSYFPRCMMSPSCLPIHNEYEYSRIHYNPRKRVRRWRNILRRFMRESKTLCRSKPMSFQYDPVSYSQNFDEGCHLDEPRPGLQDVKWDSHH	ATGTCAAACTCCACACAAATGGAAAAGGATCTCACAATGACAGTGCAGCGATCCTCTTACTTCCCCAGGTGCATGATGTCCCCTTCGTGCTTGCCAATCCACAACGAGTACGAGTACTCGCGAATCCACTACAACCCCAGAAAGAGGGTGAGAAGGTGGAGGAACATCCTCAGAAGGTTCATGAGGGAGAGCAAGACCTTGTGTAGATCCAAACCTATGTCATTTCAATATGATCCTGTTAGCTACTCCCAGAACTTCGATGAGGGCTGCCATCTTGATGAACCTAGGCCAGGGTTGCAAGATGTTAAGTGGGATTCACATCATTGA
Chr01	GmHk_01G000194.1	2044659	2059676	-	AGL21_0	Agamous-like MADS-box protein AGL21	GO:0000977;GO:0003677;GO:0003700;GO:0005634;GO:0006355;GO:0045944;GO:0046983	IPR002487;IPR033896;IPR036879	PF00319;PF01486	cd00265		Transcription factor	K	MGRGKIVIERIDNSTSRQVTFSKRRKGLIKKAKELAILCDAQVGLVIFSSTGKLYEYASTSMKSIIERYNTCKEEHHRQMNPESEVKREAEILRQQLQNLQENHRQLMGEQLYGLSVRNLQDLENQLELNLQGVRMKKEQILKDEIQELNRKGNLIFQENVELYKKVFGTTDMATTSRNAFVPLSYGMHAAGGNPQELVQLQLCQPEQEVCETSDTATK	ATGGGAAGGGGGAAGATTGTGATTGAAAGGATCGACAATTCCACTAGCCGGCAAGTGACTTTCTCAAAGAGAAGAAAGGGATTGATCAAGAAAGCCAAAGAGCTAGCAATCCTCTGCGATGCACAAGTTGGCCTTGTCATATTCTCCAGCACGGGAAAGCTTTATGAATATGCCAGCACCAGCATGAAATCAATCATCGAGAGATATAACACGTGCAAGGAAGAACATCACCGTCAGATGAATCCAGAATCTGAAGTCAAAAGGGAGGCAGAAATTCTAAGGCAGCAACTACAGAATCTACAAGAAAACCATCGGCAATTGATGGGAGAACAGCTATATGGTCTGAGTGTGAGAAACCTACAAGATCTAGAGAATCAACTGGAACTGAATCTCCAAGGT…
Chr01	GmHk_01G000195.1	2071008	2071823	-	LEC2_1	Agglutinin-2	GO:0030246	IPR001220;IPR013320;IPR016363;IPR019825	PF00139	cd06899			R	MASHAAQNPKSVFLMTFLLLITSAKSDSFSFNLPRFEPDALNILLDGSAKTTGGVLQLTKKDKRGNPTQHSVGLSAFYAALHLSDAKTGRVANFATEFSFVVNTKGAPLHGDGFTFYLASLDFDFPDNSSGGFLGLFNKKTAFNTSLNQVVAVEFDSFANEWDPNFPESDSPHIGIDINSIRSVATAPWPLDIQPQGSIGKARISYQSSSKILSVSVAYPNSPVKLNATVLSYPVNLGAVLPERVLFGFSAATGDLVETHDILSWSFNSFL	ATGGCCAGCCATGCAGCTCAAAACCCTAAATCTGTTTTCCTTATGACCTTCCTCTTGCTAATCACCAGCGCCAAATCAGACTCATTTTCTTTCAACCTACCCAGATTTGAGCCAGATGCTTTAAACATACTACTCGATGGTAGTGCCAAGACAACAGGTGGAGTGCTACAACTCACCAAAAAGGACAAAAGAGGAAACCCTACACAACACAGCGTTGGCCTCTCAGCATTCTATGCAGCACTTCATCTCTCCGACGCAAAAACTGGGAGAGTCGCAAACTTCGCCACCGAGTTCTCCTTCGTCGTGAACACAAAGGGTGCACCACTCCACGGCGACGGCTTCACCTTCTACCTTGCATCACTCGACTTTGATTTCCCAGACAACTCAAGTGGTGGCTTC…
Chr01	GmHk_01G000196.1	2072922	2073788	+	LEC2_0	Agglutinin-2	GO:0030246	IPR013320;IPR016363	PF00139	cd06899		Legume lectin domain	S	MAFPNSKPNLLQSLSPLIKFFIPFLLLLQHQSVKSQQQPPSPMSAYETVGFDFSFFDKDDPNVLLIGNASVSGGALRLTNTDQLGKPVPHSVGRVVHITPIHLWNKNNGHLADFTSDFSFVVNPKGSALRGDGFAFFLTSANLNFLIPKNSSGGYLGLFKPETALDPSKNQIVAIEFDSFTNDWDPNSPNQSPHVGIDVDSIKSVATVPWPSELEPDNAVAHASLNYNSEDKRLSVFVGYPDNRNATVSAIVDLRNVLPEWISVGFSASTGDLVETHDILNWSFEAAL	ATGGCTTTCCCCAACTCAAAACCTAACCTCCTTCAATCTCTTAGTCCCCTTATCAAATTTTTCATCCCTTTCCTCTTGTTGCTACAACATCAAAGTGTCAAGTCACAACAACAACCCCCATCCCCAATGTCAGCATACGAAACCGTTGGCTTTGACTTCTCTTTTTTCGACAAAGATGATCCAAACGTACTTTTGATCGGCAATGCCTCAGTATCTGGTGGGGCTCTAAGGTTAACCAACACCGACCAACTTGGCAAACCAGTTCCACACAGTGTTGGAAGAGTAGTGCATATCACACCGATACACCTCTGGAACAAGAACAACGGACATCTCGCAGACTTCACCTCTGATTTCTCCTTTGTCGTGAACCCTAAGGGTTCAGCCCTTCGTGGTGATGGC…
Chr01	GmHk_01G000197.1	2090649	2097973	+	rhiE_0	Rhamnogalacturonate lyase	GO:0003824;GO:0005975;GO:0030246	IPR010325;IPR011013;IPR013784;IPR029411;IPR029413	PF06045;PF14683;PF14686	cd10316;cd10317;cd10320		Rhamnogalacturonate lyase	S	MVFCNSIRVFLGKTLENVKMKVERVSIFQWWVRVAVQLSLILLGAFSDRVSSIRSVSTSPPVKLNTENPHQVVISNGIVSLNLSKPEGHIIGIYNGINNLLEPKNKEDDRGYLDVVWNEPGKPGIFERIDGTHFSVIAANENIVEISFLRTWTASMKGSSVPMNIDKRYILRRGDYGFYSYAIFNRPSGLPAVEVYQIRIVFKLDEARFHYMAISDARQRNMPSMRDRLSGQSLAYPEAVLLTHASEPQFKGEVDDKYQYSSENKDNTVHGWITQDDSAPVGFWLITPSNEFRHAGPIKQDLTSHVGPTTLSMFVSTHYAGKEVAMVFGEGETYKKVFGPVFVYLNSVPNKSQFRSLWSDAVEQLSNEVRRWPYDFVGSKDFLPPNQRGTVTGRLLVLD…	ATGGTTTTCTGTAACTCTATTAGGGTCTTTCTGGGAAAGACATTGGAGAATGTCAAGATGAAGGTGGAAAGGGTTTCAATATTCCAGTGGTGGGTTAGAGTAGCTGTGCAGCTCAGCTTAATCTTGCTTGGTGCCTTTTCTGATAGAGTCTCATCAATTAGAAGCGTTTCGACGTCTCCTCCAGTAAAGCTGAATACCGAAAATCCTCACCAGGTGGTGATTAGCAACGGCATCGTTTCCCTCAATTTGTCAAAGCCCGAGGGCCATATCATTGGAATATATAATGGAATTAACAATTTACTTGAGCCAAAAAATAAAGAAGACGATAGAGGTTACTTGGACGTCGTTTGGAACGAACCAGGAAAACCTGGCATATTTGAGAGAATCGATGGGACACAT…
Chr01	GmHk_01G000198.1	2103213	2107619	-	CAD_1	putative mannitol dehydrogenase	GO:0008270;GO:0016491;GO:0055114	IPR011032;IPR013149;IPR013154;IPR020843;IPR036291	PF00107;PF08240	cd05283		alcohol dehydrogenase	C	MASSQPEMEHPKKVFGWAARDSSGLLSPFNFSRRETGEKDLVFKVQYCGICHSDLHMLKNEWGNTTYPLVPGHEIAGVVTEVGSKVQKFKVGDRVGVGCMIGSCRSCESCDENLENYCPKMILTYGVKYFDGTITHGGYSDLMVADEHFVVRIPDNLPLDAAAPLLCAGITVYSPLRYYGLDKPGLNLGVVGLGGLGHMAVKFAKALGANVTVISTSPNKKKEAIENIGADSFVVSREQDQMQAVMGTMDGIIDTVSAVHPLVPLIGLLKPHGKLVMVGAPEKPLELPAFSLLMGRKMVGGSSIGGMKETQEMIDFAAKHGVKPDIEVIPIDYVNTAIERLAKADVKYRFVIDIGNTLKPSS	ATGGCGTCGTCACAACCAGAGATGGAGCATCCAAAGAAGGTTTTTGGTTGGGCTGCTCGGGACTCATCTGGGCTTCTCTCCCCATTCAACTTCTCCAGAAGAGAAACGGGGGAGAAAGATTTGGTATTCAAAGTGCAATACTGTGGAATATGCCACTCAGATCTACATATGTTAAAGAACGAGTGGGGCAACACAACCTATCCTCTGGTTCCTGGGCACGAGATTGCTGGTGTGGTAACAGAAGTTGGAAGCAAGGTGCAAAAGTTCAAAGTTGGAGACCGGGTAGGTGTGGGGTGCATGATTGGATCCTGTCGTTCATGTGAAAGCTGTGATGAAAATCTTGAGAATTACTGCCCCAAAATGATTCTCACATACGGTGTCAAGTATTTTGATGGCACC…
Chr01	GmHk_01G000199.1	2120756	2123197	+	CAD_0	putative mannitol dehydrogenase	GO:0008270;GO:0016491;GO:0055114	IPR011032;IPR013149;IPR013154;IPR020843;IPR036291	PF00107;PF08240	cd05283		alcohol dehydrogenase	C	MAAQAEIEHPRKAFGWAARDSSGLLSPFNFCRREPGEKDVAFRVLYCGICHSDLHSIKNEWGTSIYPMVPGHEVAGVVTEVGSKVEKFKVGDKVGVGCLVDSCRTCQNCCDNLENYCPQSTFTYGAKYRDGTITYGGYSDSMVADEHFVVRIPDRLPLDAAAPLLCAGITVYSPLRYYGLDKPGLHVGVVGLGGLGHMAVKFAKAFGAKVTVISTSPNKKEEAIQNLGADSFLISRDQDQMQAAMGTFDGIIDTVSAVHPLLPLIGLLKSHGKLVMVGAPEKPLELPVFPLLAGRKIVAGSLIGGLKETQEMIDFAAKHNVKPDIEVIPMDYVNTAMERLLKADVKYRFVIDIGNTLKF	ATGGCAGCACAAGCTGAAATTGAGCATCCTAGGAAGGCATTCGGATGGGCAGCTAGGGATTCTTCCGGTCTTCTCTCCCCTTTCAATTTCTGCAGAAGGGAACCCGGTGAGAAAGATGTGGCATTCAGAGTGTTGTACTGTGGGATATGCCACTCGGACCTCCACAGCATAAAGAACGAATGGGGTACTTCCATCTATCCAATGGTTCCTGGGCATGAGGTAGCTGGTGTAGTAACAGAGGTGGGAAGCAAAGTAGAGAAGTTCAAAGTTGGGGACAAGGTTGGTGTGGGATGCCTGGTTGATTCCTGCCGCACCTGCCAAAACTGTTGTGACAATCTTGAGAATTATTGTCCTCAATCTACGTTCACATATGGTGCCAAATATAGAGATGGAACCATC…
Chr01	GmHk_01G000200.1	2125246	2125449	+	-	hypothetical protein						-	-	MTFCSVSDRETGPAVEQVVVVIVVVEDVGRGTAQSDEERKVVVVLWNAVVQRKVCSVGFRERPECRA	ATGACCTTCTGCAGTGTCAGTGACCGGGAAACCGGTCCCGCCGTTGAGCAAGTTGTTGTTGTTATTGTTGTTGTTGAAGACGTTGGCCGTGGTACCGCCCAGTCCGATGAGGAAAGGAAGGTTGTTGTTGTTCTGTGGAACGCCGTTGTTCAGAGGAAGGTTTGCTCCGTTGGGTTTCGCGAACGCCCAGAATGTCGTGCATGA
Chr01	GmHk_01G000201.1	2138846	2139859	+	DOF5.7_0	Dof zinc finger protein DOF5.7	GO:0003677;GO:0006355		PF02701			zinc finger protein	S	MSPDDTPPPKPATAKDQETQSSGGGRKSSSTRPQEQGLKCPRCDSPNTKFCYYNNYSLTQPRHFCKTCRRYWTKGGALRNVPIGGGCRKNKKVKSSRLSCDSKDSGSSSSELGGLKFLHSLSPSMDFHLGGLPFPRLHHHHPPTPYNHFSSFGDTSSASSCFNLDPSPGTTPSSSFAALNNYPFSYNGAIQGMSSLNVHSGLASSIESLSSINQDLHWKLQQQRLAMLFGGDNNNQKDHSGVNQIENLAQKPQPIMFQNLEISKPGTFPVGNSRKEQGSSGDTHTPSTEWFFGNSYASVTPTPTTSSGGPGNDNASNWSSGGVHAWGDVPQQYSALP	ATGTCACCCGATGACACACCACCTCCAAAGCCTGCCACAGCAAAAGACCAAGAGACTCAAAGTTCCGGTGGTGGCAGAAAAAGCTCCTCCACAAGGCCCCAAGAGCAAGGTCTCAAGTGTCCACGATGTGACTCACCTAACACCAAATTCTGCTACTACAACAACTACAGCCTCACACAGCCAAGGCATTTCTGCAAGACATGTAGAAGATACTGGACAAAAGGTGGGGCTTTGCGCAACGTCCCTATTGGCGGTGGTTGTAGAAAGAACAAGAAGGTGAAGTCATCAAGGCTCTCATGTGACTCCAAAGACTCTGGTTCCTCCTCTTCAGAACTTGGTGGCCTCAAATTCCTTCATTCTCTTTCTCCTTCCATGGACTTTCACCTTGGAGGGTTACCC…
Chr01	GmHk_01G000202.1	2147005	2153217	-	KIN14R_0	Kinesin-like protein KIN-14R	GO:0003777;GO:0005524;GO:0007018;GO:0008017	IPR019821;IPR021720;IPR027417;IPR036961	PF00225;PF11721	cd01366		Kinesin family member	Z	MDPTQSNDVQQYPQTLISEPKDSPMHDANESLFDSMVCDSSSRLVPTGLTRSDNAEEECFMFVNAGGDAFSEAAGGITFLGDTYFDGGNVMRTNEQIVEGGDYPFIYQSARLGSFCYRFANLPPGDYVVDLHFVEIININGPKGMRVFNVYIQDEKACFSVLSELDIYAVVGANKPLQMVDSRVSVKDDGVILIRFESITGSPVVSGICIRRATKASVPQVTRDYIKCSSCAAQIEIPSSQMKVMQAKSTAKYKSKIKELTMQCDLKAKECYEAWMSLTAKNEQLEAVQMELDKVTFKLLTTDQTVEKQAESLRNISNRYELDKKKWAEAINSLQEKIKLMKSDYSKLSFEAHECVDSIPELNKMVFAVQELVKQCEDLKVKYSEEMAKRKKLFNEVQE…	ATGGATCCGACTCAATCGAACGACGTTCAGCAATACCCACAAACCCTAATCTCAGAGCCTAAAGATTCTCCAATGCACGACGCCAACGAGTCCTTGTTCGATTCGATGGTTTGCGACTCCAGTTCAAGACTGGTCCCAACTGGGCTTACGAGATCTGACAACGCAGAAGAGGAGTGTTTCATGTTTGTAAATGCGGGAGGGGATGCTTTTAGTGAAGCAGCTGGTGGAATAACGTTCCTGGGTGACACCTATTTTGATGGTGGCAACGTTATGCGTACCAATGAGCAAATAGTGGAGGGTGGAGACTACCCATTTATCTACCAATCAGCTCGGTTGGGAAGCTTTTGTTATAGGTTTGCTAATCTTCCTCCTGGAGACTACGTTGTTGATCTTCATTTT…
Chr01	GmHk_01G000203.1	2158498	2162404	+	At5g03795_0	putative glycosyltransferase At5g03795		IPR040911	PF03016			Exostosin	S	MMTVKQGFFSLRGSLLFFAILTLLSFTYLSLKYSTPTPQVAKLSVENLNDAPVSEKEEKEEVPDTYHSPRVFKLNYEEMEKKFKVYIYPDGDPNTFYQTPRKLTGKYASEGYFFQNIRESRFCTENPDEAHLFFIPISCHKMRGKGTSYENMTIIVQNYVESLISKYPYWNRTLGADHFFVTCHDVGVRATEGLEFLVKNSIRAVCSPSYDVGFIPHKDVALPQVLQPFALPAGGNDIENRTTLGFWAGHRNSKIRVILARVWENDTELDISNNRISRATGHLVYQKRFYRSKFCICPGGSQVNSARIADSIHYGCIPVILSNYYDLPFNDILDWNQFAVVLKESDVYQLKQILKNISDAEFVTLHNNLVKVQKHFQWNSPPIRFDAFHLVMYDLWLRH…	ATGATGACCGTGAAGCAAGGTTTCTTCTCTCTGCGAGGCTCACTCCTCTTCTTCGCAATCCTCACCCTTCTCTCCTTCACCTACCTTTCTCTCAAATACTCCACCCCAACACCCCAGGTTGCCAAGCTCTCGGTCGAGAACCTCAACGATGCGCCGGTAAGCGAGAAAGAAGAGAAAGAAGAGGTTCCGGACACGTACCACTCGCCGCGCGTGTTCAAGCTGAACTATGAGGAAATGGAGAAGAAGTTCAAGGTTTATATATACCCAGATGGGGATCCTAACACGTTCTACCAGACGCCGAGGAAGCTCACCGGAAAGTACGCCAGCGAAGGCTATTTCTTCCAGAACATCAGAGAGAGTCGCTTCTGCACCGAAAATCCCGATGAGGCACACCTCTTC…
Chr01	GmHk_01G000204.1	2169253	2173847	-	RCF3_0	RNA-binding KH domain-containing protein RCF3	GO:0003676;GO:0003723	IPR004088;IPR036612	PF00013	cd00105;cd02396		mRNA transport	S	MQDPATSDTDHQTTPSPKRSNTTTTNRSSKRPVFKVLPGQIAFRLVCHASTVGGLIGSSGSIVSQLRRETGCKIHCEDSLSSAEDRVILVIGSLSPRKGLLLGDGGEVEVSSAQEAVVRVFERVWDLEAEKGVNSNRAVNGEVFSKLLAHTSQIGAVVGKGGKNITAIRNNTGAKIRVFPPPQCATKDEELVQITGGILAVKKALISVSHCLQDCPPLCKVPVTSSTPTVSSSDRLSSDPNAELFPHLNSLLTSMEGLSIYERTTNSNETSNRDSKGAEHEVVFRLLCSNNVAGSVIGKRGAIVRALESKTGASIIFAAPLSEHAERIVTISAVESLESCNSPAQDAVILVFARIIEDHIGKGFLQVSSMESPVTARLLVATSTVNCFSGNEGQVISEL…	ATGCAAGACCCCGCCACCTCCGACACCGATCACCAAACGACGCCGTCGCCGAAGCGCAGCAACACCACCACGACTAACCGTTCTAGCAAGCGCCCCGTGTTCAAGGTCCTCCCGGGGCAGATCGCGTTCCGCCTCGTGTGCCACGCGTCCACCGTCGGCGGGCTCATCGGCAGCTCCGGCTCCATCGTGTCGCAGCTCCGCCGCGAGACCGGCTGCAAAATCCACTGCGAGGACTCCCTCTCCTCCGCCGAGGACCGCGTCATCCTCGTCATCGGCTCCCTCTCGCCGCGAAAGGGCCTCCTGCTCGGCGACGGCGGCGAGGTCGAGGTCTCCAGCGCGCAGGAGGCCGTCGTTAGGGTTTTCGAGAGGGTTTGGGACCTCGAAGCCGAGAAAGGCGTT…
Chr01	GmHk_01G000205.1	2181345	2184390	+	At5g65560_0	Pentatricopeptide repeat-containing protein At5g65560	GO:0005515	IPR011990	PF12854;PF13041;PF13812		TIGR00756	Pentatricopeptide repeat-containing protein	S	MRINGQSRRSWSDLESLKEKHFKANELVYTALIDGYCKAGEIEDAVSMFKRMLTEECLPNLITFNVLIDGLRKEGKVQDAMLLVEDMAKFDVKPTLHTYTILVEEVLKEYDFDRANEILNQIISSGYQPNVVTYTAFIKAYCSQGRLEEAEEMVVKIKNEGILLDSFIYNLLINAYGCMRLLDSAFGILKCMFDTSCEPSYQTYSILMKHLVIEKYKKEGSNPVGLNVSLTNISVDNADIWNKIDFEVTTVLFEKMAECGCVPNLNTYSKLIKGLCKVGLLDVAFSLYHHMRETGISPSEIIHNSLLSSCCKLGMFGEAVTLLDSMMECSHLAHLESYKLLICGMFEQMNKEKAEAVFCSLLRCGYNYDEVAWKVHIDGLAKNKYILSKHGLRGVQSSV…	ATGAGGATAAATGGGCAGAGTCGGAGAAGCTGGTCAGATTTGGAGTCCCTCAAGGAAAAACACTTCAAAGCAAATGAGCTTGTATATACAGCCTTGATTGATGGATACTGCAAAGCTGGGGAAATTGAAGATGCTGTTTCAATGTTCAAAAGGATGCTTACTGAGGAATGTTTGCCTAACTTGATCACATTCAATGTATTGATTGATGGCTTACGCAAAGAGGGTAAAGTGCAAGATGCAATGTTGTTAGTGGAAGACATGGCAAAGTTTGATGTGAAGCCCACTCTTCATACTTATACTATTCTTGTTGAGGAAGTACTGAAGGAATATGACTTCGACCGAGCTAATGAGATTCTCAACCAAATCATTTCATCAGGATATCAGCCTAATGTGGTCACC…
Chr01	GmHk_01G000206.1	2188078	2192030	-	-	hypothetical protein	GO:0046982					NA	S	MAMLGEDGRGYELARKLDTCGVWRTWLGDATYANFAPFLSSPSAWDSFITSTTHIPLQLRVRALLFDKATASLSPNPNPSLSIQRLNPSYLQLHADDIYFTLDADSKNQSKPSSSTGSRYVESELPETWYNLVIEKYKANKNLVSGESRSPADMASYINYVTNHKKRRVAFKEDVNSVTDHALQPNGGGGLVADDDSPVFPEIAYALNCVPDSALPLSERVENNSSNQKVVKVFSVLDTLPPIAATRSSVMMERLGVRPDIGSVEHGGGVSSGKFGAEGNGKVIGPEQAAKLSQKAVARILLGVGFEGAMEGSVEDFSEVLSKRISKIGSNLRVLADSYKKQCSAIELLKMLLKTVGFSNFTPLVDVVKDGSKNNVQQSQQQIHGMQPQLQQQQQSSLR…	ATGGCTATGCTGGGGGAGGACGGTCGCGGCTACGAACTGGCACGGAAGCTTGACACGTGCGGCGTGTGGCGAACCTGGCTCGGCGACGCCACCTACGCCAACTTCGCACCCTTCCTCTCTTCCCCTTCCGCCTGGGACTCCTTCATCACCTCCACCACTCACATCCCTCTCCAACTCAGAGTCCGCGCCCTCCTCTTCGACAAAGCCACCGCTTCCCTCTCCCCAAACCCTAATCCCTCTCTCTCTATCCAACGCCTCAACCCTAGTTACCTCCAACTGCACGCCGACGACATCTACTTCACCCTCGACGCCGACTCTAAGAATCAATCCAAGCCTTCTTCCTCGACTGGATCCAGGTATGTTGAATCTGAACTTCCGGAAACGTGGTATAATCTAGTA…
Chr01	GmHk_01G000206.2	2187599	2192030	-	-	hypothetical protein	GO:0046982					NA	S	MAMLGEDGRGYELARKLDTCGVWRTWLGDATYANFAPFLSSPSAWDSFITSTTHIPLQLRVRALLFDKATASLSPNPNPSLSIQRLNPSYLQLHADDIYFTLDADSKNQSKPSSSTGSRYVESELPETWYNLVIEKYKANKNLVSGESRSPADMASYINYVTNHKKRRVAFKEDVNSVTDHALQPNGGGGLVADDDSPVFPEIAYALNCVPDSALPLSERVENNSSNQKVVKVFSVLDTLPPIAATRSSVMMERLGVRPDIGSVEHGGGVSSGKFGAEGNGKVIGPEQAAKLSQKAVARILLGVGFEGAMEGSVEDFSEVLSKRISKIGSNLRVLADSYKKQCSAIELLKMLLKTVGFSNFTPLVDVVKDGSKNNVQQSQQQIHGMQPQLQQQQQSSLR…	ATGGCTATGCTGGGGGAGGACGGTCGCGGCTACGAACTGGCACGGAAGCTTGACACGTGCGGCGTGTGGCGAACCTGGCTCGGCGACGCCACCTACGCCAACTTCGCACCCTTCCTCTCTTCCCCTTCCGCCTGGGACTCCTTCATCACCTCCACCACTCACATCCCTCTCCAACTCAGAGTCCGCGCCCTCCTCTTCGACAAAGCCACCGCTTCCCTCTCCCCAAACCCTAATCCCTCTCTCTCTATCCAACGCCTCAACCCTAGTTACCTCCAACTGCACGCCGACGACATCTACTTCACCCTCGACGCCGACTCTAAGAATCAATCCAAGCCTTCTTCCTCGACTGGATCCAGGTATGTTGAATCTGAACTTCCGGAAACGTGGTATAATCTAGTA…
Chr01	GmHk_01G000207.1	2230971	2235994	+	RBK1_0	Receptor-like cytosolic serine/threonine-protein kinase RBK1	GO:0004672;GO:0005524;GO:0006468	IPR008271;IPR011009;IPR017441	PF00069			Serine Threonine protein kinase	T	MLRKENRSENKCGEEGKIEEKENPEMATTDNHVKEFTIDDESSPRAILETPVSGTESDNSGSSESFSSVSPEKSPAVTGKEVPKEGYVQQLKSMIDVFKFKSVRKLTAVPLLSVGHDISRKGFTKKLARIRSAEDSIDIGAFPTKPSWRNFDYEELAAATENLIGKGGHAEVYKGYLPDGQVIAVKRLMKNEKDAADRAGDFLTELGIIAHINHPNATRLVGFGVDCGLYFVLQLAPHGSLSSLLFGSECLDWKIRFKVAIGVAEGLHYLHKECPRRIIHRDIKASNILLNENFEAEISDFGLAKWLPSKWTNHVVFPIEGTFGYLAPEYFMHGVVDEKTDVFAFGVLLLELITGRRAVDSNSRQSLVIWAKPLLDTNNVKDLADPRLGEEYDLTEMKR…	ATGCTGAGAAAGGAAAATAGAAGTGAAAACAAGTGTGGAGAAGAGGGGAAAATAGAAGAGAAGGAAAACCCAGAAATGGCAACCACGGATAATCACGTGAAAGAGTTTACGATCGACGACGAGTCATCGCCGAGGGCGATTCTGGAAACCCCTGTTTCGGGAACAGAGTCCGACAACAGTGGAAGCAGCGAAAGCTTCAGTTCCGTCTCGCCGGAGAAGTCGCCGGCGGTGACCGGAAAAGAGGTTCCCAAGGAAGGTTACGTGCAACAGTTGAAGTCCATGATCGACGTTTTCAAGTTCAAGTCTGTGAGAAAGTTAACAGCCGTTCCTCTGCTTTCGGTGGGCCATGATATCTCTCGGAAAGGGTTCACCAAAAAACTTGCTCGTATTCGAAGTGCT…
Chr01	GmHk_01G000208.1	2241591	2246085	-	AIL6_0	AP2-like ethylene-responsive transcription factor AIL6	GO:0003677;GO:0003700;GO:0006355	IPR016177;IPR036955	PF00847	cd00018		Transcription factor	K	MARATNWLSFSLSPMEMLRTSEPQFLQYDAASATSSHHYYLDNLYTNGWGNGSLKFEQNLNHSDVSFVESSSQSVGHVPPPPPKLEDFLGDSSAVMRYSDSQTETQDSSLTHIYDHHHHHHHHHGSTSYFGGDQQDLKAITGFQAFSTNSGSEVDDSASIGKAQASEFGTHSIESSGNEFAAFSGGTTGTLSLAVALSSEKAVVAAESNSSKKIVDTFGQRTSIYRGVTRHRWTGRYEAHLWDNSCRREGQARKGRQGGYDKEEKAARAYDLAALKYWGPTATTNFPVSNYSKEVEEMKHVTKQEFIASLRRKSSGFSRGASIYRGVTRHHQQGRWQARIGRVAGNKDLYLGTFATEEEAAEAYDIAAIKFRGANAVTNFEMNRYDVEAIMKSSLPVGG…	ATGGCTCGTGCTACTAACTGGCTTTCGTTCTCTCTCTCCCCAATGGAAATGCTCCGAACCTCCGAACCTCAGTTCCTTCAATACGACGCCGCTTCCGCTACTTCCTCACATCACTACTACCTCGACAACTTGTACACCAACGGGTGGGGCAACGGGAGCCTCAAGTTTGAGCAGAATCTCAACCACAGTGACGTGAGTTTTGTTGAATCTTCGTCGCAGAGCGTCGGCCACGTGCCGCCGCCGCCGCCGAAGCTGGAGGATTTTCTCGGCGACTCCTCCGCCGTGATGCGTTACTCCGACAGCCAGACGGAGACGCAGGACTCGTCGCTGACGCACATCTACGACCACCACCACCACCACCACCACCACCACGGTTCTACTTCGTACTTCGGCGGTGAC…
Chr01	GmHk_01G000209.1	2258730	2262841	-	ZMYM1_0	Zinc finger MYM-type protein 1	GO:0046983	IPR008906;IPR012337;IPR025398	PF05699;PF14291			zinc finger MYM-type protein 1-like	S	MSLFSFNTNLLRGQFLQLPPSSPPPSSSPLCLLFPPSPTPSISSSPRRRRRLLFHNPIAAADMRRFLVDRENIENVNVVQPEAELEPPLNNVVNEFNPNEIVRDPGRRKQINEYAPDIQDQVRRAYILKGPMQPDLSNFPRTQFGSVKRAFSKSWYNNYTWLEYSEIKDAAYCFYCFLFKQPGRAEHFGFEVFTKSGYRDWKHASQGLKGHVGSHNSLHNSCVKHYNDYNNQRQSVTSKFAKATKESEELYKIRLTCSLDCSRYLIAQGMAFRGHDESSTSLNKGNFREMVDWVKSQNEQVRDAFDRGGKNCKMTCGDIQKELATCCAHEVTKVIMEELGDRQFSVLIDESRDISVKEQMAVMLRFLNDKGNVVERFIALHHVTDTSSKSLNDALYGIL…	ATGTCATTGTTCTCTTTTAACACAAACTTGTTACGTGGGCAGTTCCTCCAACTCCCTCCGTCGTCGCCGCCTCCCTCCTCCTCTCCTCTGTGTCTTCTCTTCCCTCCATCGCCGACTCCTTCTATTTCCTCCTCTCCGCGCCGTCGTCGCCGTCTTCTCTTCCATAATCCCATAGCAGCCGCAGATATGAGGAGATTTTTGGTTGATAGAGAAAATATTGAGAATGTGAATGTTGTGCAACCGGAAGCTGAATTAGAACCACCACTTAATAATGTGGTTAATGAGTTTAATCCAAATGAGATTGTGCGTGATCCAGGTCGTAGGAAACAAATTAATGAGTATGCTCCGGATATTCAAGACCAAGTGAGGAGGGCATATATATTGAAGGGTCCAATGCAA…
Chr01	GmHk_01G000210.1	2274287	2274469	-	-	hypothetical protein						-	-	MAQPSISLSAYLVLSETGDIGAKRDVKHESQNSRSARNRKQNPLSERSPLSARSNRSSKR	ATGGCCCAACCCAGCATCTCGCTTAGCGCGTACCTCGTGCTAAGCGAGACAGGAGACATAGGTGCTAAGAGAGACGTTAAGCACGAGAGTCAGAACTCGCGCTCAGCGCGCAACAGAAAACAGAACCCGCTAAGCGAGAGGAGCCCGCTAAGCGCGCGATCCAACAGAAGCAGCAAGCGCTAA
Chr01	GmHk_01G000211.1	2274679	2276081	+	Os03g0733400_0	Zinc finger BED domain-containing protein RICESLEEPER 2		IPR012337				Pfam:hATC	S	MSKKQKSNSSSTTITPSSSSMIDQEACQIALVKLFVALKLFFHTVEHEAFREFFSIIAPFRVVVSCTTLTRDVLSLWSSEKVKLKSFFLKIVKGVRVAIKYVKSSPSRLSKFKECVAQVNIEYKGLVCLYVETRWNSTYLMLEASLKHHKAFEEFKLRDKKFMGSDPTYYDWEFVRSILPFFEIFYDATLRISGSSYLARTMYMFEAFGIGMKIRKMSTSRGGELTYKLRDKMESSFRSLFEEYSSGGDEFKVSSQEARARPSERDENDPYGYSRYFQSTISSTSE	ATGAGCAAGAAGCAAAAATCAAATTCTTCTTCAACGACCATTACTCCTTCTTCCTCTTCCATGATTGACCAAGAAGCATGTCAGATTGCACTGGTGAAATTGTTTGTGGCATTGAAGCTCTTTTTCCATACAGTTGAGCATGAAGCCTTTCGAGAATTTTTTAGCATTATAGCACCTTTTCGTGTTGTCGTCTCATGCACTACCTTGACACGAGATGTTCTTAGTCTTTGGAGTAGTGAGAAAGTAAAATTGAAGAGCTTTTTTCTCAAGATTGTTAAAGGGGTTCGTGTTGCTATCAAGTATGTAAAATCCTCCCCTTCTAGATTGTCTAAATTCAAGGAATGTGTTGCACAAGTAAACATTGAATATAAAGGCCTTGTTTGCTTATATGTAGAAACT…
Chr01	GmHk_01G000212.1	2280141	2285255	+	PUB50_0	Putative U-box domain-containing protein 50	GO:0004672;GO:0004842;GO:0005524;GO:0006468;GO:0016567	IPR001245;IPR003613;IPR011009;IPR013083	PF04564;PF07714	cd16655		Ubox domain-containing protein	O	MDAIQTEKIYVAVGNDVQDGYKTLNWALKKWNSHPISIVILHLTHNSTKDYVHTPFGKLPARSVSEEKLQILRKDEQDKINKLLSKYIAFCGKVPAEILEVEKFDEPMQKRVIDLIFGLGITKLVMGFSFMKPSMKSKGAINGLFHVHEQKPSFCELFVICGGKQVFLRGKNDEKIMEDDQGVMVARMRDKITFKDWLDKWFKDKTNDSQDRIASLSSSNLESPVNRNQWEFYLQEIENYYQELLSSKPEEGSCVQENDDSQIGPIEPHVTEQNNYNMSTAEKIEILKNKLNEGQKTIQLKRKEAKDNIERHTKAEWAICLCNSRAEELESRIREEVSAREELKKESDAEKEQTEEMRTEVEERKRRLSSLTEVQSELSNRLQIWTLAKIRAETQLEKA…	ATGGATGCAATCCAAACCGAGAAAATCTATGTTGCTGTTGGGAATGATGTGCAGGATGGATATAAGACTTTGAATTGGGCTCTCAAGAAGTGGAATTCTCATCCAATTTCCATTGTTATTCTCCATCTCACACACAATAGTACCAAGGATTATGTCCATACACCATTTGGGAAACTTCCAGCAAGATCTGTGAGTGAGGAGAAACTACAAATTCTCAGGAAAGATGAGCAGGATAAAATCAACAAGCTGCTTTCCAAGTATATTGCTTTCTGTGGAAAGGTGCCAGCAGAGATTCTTGAAGTTGAGAAATTTGATGAACCTATGCAAAAGCGCGTCATAGACTTGATCTTTGGTCTAGGAATAACCAAATTGGTCATGGGATTTTCATTCATGAAGCCC…
Chr01	GmHk_01G000213.1	2286526	2291382	-	NAT11_0	Nucleobase-ascorbate transporter 11	GO:0016020;GO:0022857;GO:0055085		PF00860			permease	F	METGSKSESLNRNVAMSVRGGTGKKKQQGGVAGKVDSFVPRSEHNPRELRSWAKRTGFVSDYSGEAGTSGSAKFEALERRREGSSPKIEIDPVVGRTRQNEIVPESHGGATRGENGAVLDGRGRKEKENEGGERKVGFNGNGNGHGVSAVAPVNEEKEGEEGNGDVKVNVFPEGEEVGDGGWQGPLGLKCGLKENPGIVSLIYYGLQHYLSLAGSLVLIPLVMIPVMGGTDKDTATVISTMLFLSGITTILHSYLGTRLPLVQGSSFVYLAPALVIINAQEYRNLTEHKFRHIMRELQGAIIVGSVFQCILGFSGLMSILLRLINPIVVAPTVAAVGLAFFSYGFPQAGTCPEITIPQIALVLIFTLYLRGISIFGRHLFRIYAVPLSLTIIWIYASFL…	ATGGAAACTGGGTCGAAATCAGAATCACTGAACAGAAACGTGGCGATGAGTGTGAGGGGTGGCACTGGGAAGAAGAAACAGCAGGGTGGTGTAGCAGGCAAAGTGGACTCTTTTGTGCCGAGAAGTGAGCACAACCCGCGAGAGTTACGGTCGTGGGCGAAAAGAACGGGTTTTGTTTCTGATTACTCGGGGGAAGCAGGGACAAGTGGGAGTGCAAAGTTTGAAGCTTTAGAGAGGAGAAGAGAAGGGTCATCTCCGAAGATAGAGATAGATCCGGTGGTGGGGAGAACGAGGCAAAACGAGATCGTACCAGAGTCTCATGGAGGTGCAACGAGGGGTGAGAATGGTGCTGTTTTGGATGGGAGGGGGAGGAAAGAGAAGGAGAATGAGGGTGGTGAG…
Chr01	GmHk_01G000214.1	2296898	2302010	+	At5g65490_1	Protein ecdysoneless		IPR010770	PF07093			ecdysoneless homolog (Drosophila)	S	MEFPSSSSSSSIFSPRPSDDTVFYAIYPDSPTATTTVTLQSLHLKILETLSPFTQDYIWQHQPFALSVSTPPNPSCPCPSSSHLPHLHGHLRFGDNLDDEWFAVFLLFQISQRFPSLSIRLWDSDGDFLLIEAAFHLPRWLNPDSAHHRLFLRDGSLHIVPRNRLPNPSLIDSLNFIVNSPHESLASDGIQRAVRKRISNYPEQARKNMHRVRVRVPVSVAQVLKHEPRLISLAVEGFYDRDIDTMKFASRMERFVERGKAEELVCVSVKMSRAMYAQLVQQRFQAPKCYPGMPARSEKEGFAEAELGMKIACGLEMMYQQRKRDGVEGKGSSWEAFRKSLESSGYFQGMLPGSSEYQRLMQSAQEYYRNTSLHSKASDLLNAPVRRIDEILALPHLVD…	ATGGAGTTCCCTTCTTCTTCTTCTTCATCCTCCATCTTCTCCCCGCGCCCATCAGACGACACCGTTTTCTACGCCATATACCCTGACTCACCCACCGCAACCACCACCGTGACGCTCCAGTCCCTCCACCTCAAAATCCTCGAAACCCTATCTCCCTTCACCCAAGACTACATATGGCAGCACCAGCCCTTCGCTCTCTCCGTTTCAACTCCGCCGAACCCCTCCTGCCCCTGCCCCTCCTCCTCCCACCTCCCCCACCTCCACGGCCACCTCCGCTTCGGCGACAACCTCGACGACGAGTGGTTCGCCGTCTTCCTCCTCTTCCAAATCTCCCAACGCTTCCCCTCCCTCTCCATTCGCCTCTGGGACTCCGACGGCGACTTCCTCCTCATCGAGGCC…
Chr01	GmHk_01G000214.2	2296898	2302010	+	At5g65490_1	Protein ecdysoneless		IPR010770	PF07093			ecdysoneless homolog (Drosophila)	S	MEFPSSSSSSSIFSPRPSDDTVFYAIYPDSPTATTTVTLQSLHLKILETLSPFTQDYIWQHQPFALSVSTPPNPSCPCPSSSHLPHLHGHLRFGDNLDDEWFAVFLLFQISQRFPSLSIRLWDSDGDFLLIEAAFHLPRWLNPDSAHHRLFLRDGSLHIVPRNRLPNPSLIDSLNFIVNSPHESLASDGIQRAVRKRISNYPEQARKNMHRVRVRVPVSVAQVLKHEPRLISLAVEGFYDRDIDTMKFASRMERFVERGKAEELVCVSVKMSRAMYAQLVQQRFQAPKCYPGMPARSEKEGFAEAELGMKIACGLEMMYQQRKRDGVEGKGSSWEAFRKSLESSGYFQGMLPGSSEYQRLMQSAQEYYRNTSLHSKASDLLNAPVRRIDEILALPHLVD…	ATGGAGTTCCCTTCTTCTTCTTCTTCATCCTCCATCTTCTCCCCGCGCCCATCAGACGACACCGTTTTCTACGCCATATACCCTGACTCACCCACCGCAACCACCACCGTGACGCTCCAGTCCCTCCACCTCAAAATCCTCGAAACCCTATCTCCCTTCACCCAAGACTACATATGGCAGCACCAGCCCTTCGCTCTCTCCGTTTCAACTCCGCCGAACCCCTCCTGCCCCTGCCCCTCCTCCTCCCACCTCCCCCACCTCCACGGCCACCTCCGCTTCGGCGACAACCTCGACGACGAGTGGTTCGCCGTCTTCCTCCTCTTCCAAATCTCCCAACGCTTCCCCTCCCTCTCCATTCGCCTCTGGGACTCCGACGGCGACTTCCTCCTCATCGAGGCC…
Chr01	GmHk_01G000215.1	2302740	2306609	-	NET2D_0	Protein NETWORKED 2D	GO:0003779		PF07765			Kinase interacting	S	MLQRAASNAYSWWWVSHIRTKQSKWMEQNLLDMEEKVQTVLKLLEEEGDSFAKRAEMYYKRRPELISFVEESFKAYRALAERYDHISTELQNANNTIASVFPDRVPFMDEEDDDGSPRPSRKKAEGFKTNIPKPPIKDLKNVITTAAATRKFHSKKPAATAASAAPKVPKSGLSRKEALEEVDKLQKQILALQTVKEFVKNSYDNSIARYWETDEQIKELQERVSTLQDELGEGVDIEDDEARRLMAEAALKSCQEALTQLQEKQEKSLDETRIESKRVKDVKAKLGSLMDEFHYEQSNSEEPRVQRDLKEIAETKDLEENAGLAPKKQELQLLKENIKEHFETSSNSSLSVAEMAEKIDELVNKVISLETAVSSQTVMVTRLRTDTDELQEQIRTLEN…	ATGTTGCAGAGAGCGGCGAGCAATGCTTATTCATGGTGGTGGGTTAGCCACATCAGAACAAAACAATCAAAATGGATGGAGCAAAACCTTCTAGATATGGAGGAAAAAGTGCAAACTGTTTTGAAGCTCTTAGAGGAAGAGGGAGACTCTTTTGCTAAGAGAGCAGAAATGTATTACAAAAGGAGACCGGAACTGATAAGCTTTGTGGAGGAATCATTCAAGGCTTACCGAGCTTTAGCCGAAAGATATGATCACATATCAACAGAGTTGCAAAATGCCAACAACACCATTGCTTCTGTCTTTCCAGATCGTGTCCCATTTATGGATGAAGAAGATGATGATGGATCACCAAGGCCTTCAAGAAAAAAGGCAGAAGGGTTCAAAACAAATATTCCAAAG…
Chr01	GmHk_01G000216.1	2313139	2315003	-	-	hypothetical protein						expressed protein	S	MAVSLTRLSWWLWGRSNKEKEPVVSGGSTLNSSSEWSFKERESVKFPSVKGTKIAPSHRKVKRKWQSREERRHDREYDVVLVPSDGDGCLSSSESDDSDFSIGWLEPHGSDFLQSDDDLDNSFAVLVPCYRKEVESSNKELLSAIKNLPNEFSSDANALLSNYKCNAGKNYMEHWLASLKNLEA	ATGGCTGTCTCTCTGACACGTTTGTCATGGTGGTTGTGGGGTCGTAGCAACAAGGAGAAAGAGCCTGTTGTTTCTGGTGGCTCTACACTGAATTCATCTTCTGAATGGAGTTTTAAGGAAAGAGAGAGTGTTAAGTTTCCTTCAGTGAAGGGAACAAAGATAGCTCCTTCTCACAGGAAGGTTAAAAGGAAATGGCAGAGCAGGGAAGAGAGGAGACATGATAGAGAGTATGATGTTGTGTTGGTGCCATCTGATGGTGATGGTTGTTTGTCAAGCTCTGAATCTGATGACTCAGATTTTTCCATTGGGTGGTTGGAGCCTCATGGCTCTGATTTCCTTCAGAGTGATGATGATTTGGACAATAGTTTTGCTGTGCTAGTTCCTTGCTATAGGAAGGAG…
Chr01	GmHk_01G000217.1	2327278	2329518	+	At4g38062_0	Uncharacterized protein At4g38062						NA	S	MDVYEEMEEAKAEIEKLKVKLGDKTNTLQNIKKYYDAQVNKIQEAIFKVEKLNQEMLQKADDINDDLKESLNNKESIAKHLNAANDELGANCDDKFRKWHDEERGYVLALEEANEKLDNQEKQMHLSRQEIESMEGCFSVSYNKCLEIEKNLEASSKLGEANDMFQKLEEENMKVEEQLEWKEEHFKHLEEVHEKLIDQFKASKEWELEKPTLLDEISSLKSMLDYHKRISHDLQHQLQMCNQALAHEESLRKRLEDEVSNLNKEKEEKCFQLKQMELKDAALISSKKDISEEREQAACFMRQVESYGLANELLHLPHNEFDWHKDLHMEDGFKEQLNEVYDALDRANIELDERICEKSEMEFELRIWKSFVERLRNALEENLVMRKELENSLLAQVDF…	ATGGATGTTTATGAAGAAATGGAAGAAGCTAAAGCTGAAATTGAGAAACTCAAGGTAAAACTAGGAGACAAGACAAATACACTTCAGAACATAAAGAAATACTATGATGCACAGGTCAATAAGATACAGGAAGCTATTTTCAAAGTTGAGAAGCTGAATCAAGAAATGCTTCAAAAGGCAGATGATATCAATGATGATCTCAAAGAGAGTTTAAATAATAAAGAGTCCATCGCCAAACATCTCAATGCCGCAAATGATGAACTTGGAGCAAATTGTGATGATAAATTTAGAAAGTGGCATGATGAAGAAAGAGGGTATGTATTGGCGTTAGAGGAGGCAAATGAGAAACTGGATAACCAAGAAAAACAGATGCATCTGAGTAGACAAGAGATTGAAAGC…
Chr01	GmHk_01G000218.1	2331394	2337514	+	MSL2_0	Mechanosensitive ion channel protein 2, chloroplastic	GO:0016020;GO:0055085	IPR010920	PF00924			Mechanosensitive ion channel	M	MTLPGSLQLSHGLGLCRNLDCNKHSRAMGRGKLHLFSAGPSYPILFMRQEGRGFQHLRHINRPTHTLSCKSHSFKCHCFLVSGQPNNLPAVKVAATVLARSCNVLQNSPIIVKLIPAVGVIIFAIWGVGPLLFQTRKLLFQRSDSSWKKSTTYYIVASYLQPLLLWTGAILICRALEPLILPSETSQIVKERLLNFVRSLSTVLAFAYCLSSVIQQVQKFLAESTDASEARNMGFQFAGKAVYSAVWIAAFSLFMELLGFSTQKWVTAGGLGTVLLTLAGREIFTNFLSSVMIHATRPFVVNEWIQTKIEGYEVSGTVEHVGWWSPTIIRGEDREAVHIPNHKFTVNVVRNLSQKTHWRIKTHLAISHLDVNKINNIVADMRKVLAKNPQVEQQRLHRR…	ATGACTCTTCCTGGTTCCCTGCAGTTGTCCCATGGATTGGGACTTTGCAGGAACCTGGACTGCAATAAGCATTCGAGGGCCATGGGACGTGGCAAGTTACATTTATTTAGTGCAGGTCCTTCATATCCTATTTTGTTCATGAGACAGGAAGGCAGGGGTTTTCAACACCTTCGTCATATAAACAGGCCAACACATACATTATCTTGCAAATCCCACTCTTTTAAGTGTCATTGTTTTTTAGTGTCAGGTCAACCAAATAATCTTCCTGCTGTTAAGGTGGCTGCTACTGTGTTGGCTAGGTCTTGTAATGTATTGCAAAATAGTCCTATCATAGTAAAGTTGATTCCTGCAGTTGGCGTTATCATTTTTGCAATATGGGGTGTTGGTCCATTATTGTTT…
Chr01	GmHk_01G000219.1	2341294	2345417	-	OFUT39_2	O-fucosyltransferase 39		IPR019378;IPR024709	PF10250	cd11299		DUF246 domain-containing protein At1g04910-like	S	MMELGYLNQGQPSRGTTPLVTLPLLLSTLVFFSTFTHAFSSSVFPELNPIKPRHSRLLRSAVQRETPTSQLSELWSPLESQGWKPYVESNKPTALPEKSEGYIQVFLDGGLNQQKMGICDAVAVAKILNATLVIPYLELNPVWRDSSSFMDIFDVDHFIDVLKDDISIVKELPKEFAWSTREYYGLAIRETRIKAAPVHASAYWYLENVLPVLQSYGIAAISPFSHRLSFDNLPVDIQHLRCKVNFQALTFVSHIRTLGDALISRLRYPQGSAEEMGFNYLQEVTGAGARKNAGKFVVLHLRFDKDMAAHSACDFGGGKAEKLALAKYRQVIWQGRVLNSQFTDEELRSQGRCPMTPEEVGLLLAAMGFDNSTRLYLASHKVYGGEARISTLRELFPRM…	ATGATGGAGCTCGGATACCTGAATCAGGGTCAGCCTTCTAGAGGAACAACACCACTTGTCACTCTTCCATTGTTGCTTTCAACACTTGTGTTCTTCTCCACTTTCACACATGCCTTCTCTTCTTCTGTGTTTCCGGAATTGAATCCTATTAAACCTAGGCACTCACGTCTTCTCAGGAGTGCTGTGCAACGAGAAACTCCTACATCTCAGTTGTCTGAACTATGGTCACCTCTGGAAAGCCAAGGATGGAAACCTTATGTTGAATCAAATAAGCCAACAGCATTACCAGAGAAGTCAGAGGGATATATCCAGGTCTTTCTTGATGGAGGTTTGAACCAACAAAAGATGGGGATATGTGATGCAGTTGCTGTTGCAAAGATACTGAATGCTACTCTGGTG…
Chr01	GmHk_01G000219.2	2341294	2345417	-	OFUT39_2	O-fucosyltransferase 39		IPR019378;IPR024709	PF10250	cd11299		DUF246 domain-containing protein At1g04910-like	S	MMELGYLNQGQPSRGTTPLVTLPLLLSTLVFFSTFTHAFSSSVFPELNPIKPRHSRLLRSAVQRETPTSQLSELWSPLESQGWKPYVESNKPTLPEKSEGYIQVFLDGGLNQQKMGICDAVAVAKILNATLVIPYLELNPVWRDSSSFMDIFDVDHFIDVLKDDISIVKELPKEFAWSTREYYGLAIRETRIKAAPVHASAYWYLENVLPVLQSYGIAAISPFSHRLSFDNLPVDIQHLRCKVNFQALTFVSHIRTLGDALISRLRYPQGSAEEMGFNYLQEVTGAGARKNAGKFVVLHLRFDKDMAAHSACDFGGGKAEKLALAKYRQVIWQGRVLNSQFTDEELRSQGRCPMTPEEVGLLLAAMGFDNSTRLYLASHKVYGGEARISTLRELFPRME…	ATGATGGAGCTCGGATACCTGAATCAGGGTCAGCCTTCTAGAGGAACAACACCACTTGTCACTCTTCCATTGTTGCTTTCAACACTTGTGTTCTTCTCCACTTTCACACATGCCTTCTCTTCTTCTGTGTTTCCGGAATTGAATCCTATTAAACCTAGGCACTCACGTCTTCTCAGGAGTGCTGTGCAACGAGAAACTCCTACATCTCAGTTGTCTGAACTATGGTCACCTCTGGAAAGCCAAGGATGGAAACCTTATGTTGAATCAAATAAGCCAACATTACCAGAGAAGTCAGAGGGATATATCCAGGTCTTTCTTGATGGAGGTTTGAACCAACAAAAGATGGGGATATGTGATGCAGTTGCTGTTGCAAAGATACTGAATGCTACTCTGGTGATC…
Chr01	GmHk_01G000219.3	2341294	2345417	-	OFUT39_2	O-fucosyltransferase 39		IPR019378;IPR024709	PF10250	cd11299		DUF246 domain-containing protein At1g04910-like	S	MMELGYLNQGQPSRGTTPLVTLPLLLSTLVFFSTFTHAFSSSVFPELNPIKPRHSRLLRSAVQRETPTSQLSELWSPLESQGWKPYVESNKPTLPEKSEGYIQVFLDGGLNQQKMGICDAVAVAKILNATLVIPYLELNPVWRDSSSFMDIFDVDHFIDVLKDDISIVKELPKEFAWSTREYYGLAIRETRIKAAPVHASAYWYLENVLPVLQSYGIAAISPFSHRLSFDNLPVDIQHLRCKVNFQALTFVSHIRTLGDALISRLRYPQGSAEEMGFNYLQEVTGAGARKNAGKFVVLHLRFDKDMAAHSACDFGGGKAEKLALAKYRQVIWQGRVLNSQFTDEELRSQGRCPMTPEEVGLLLAAMGFDNSTRLYLASHKVYGGEARISTLRELFPRME…	ATGATGGAGCTCGGATACCTGAATCAGGGTCAGCCTTCTAGAGGAACAACACCACTTGTCACTCTTCCATTGTTGCTTTCAACACTTGTGTTCTTCTCCACTTTCACACATGCCTTCTCTTCTTCTGTGTTTCCGGAATTGAATCCTATTAAACCTAGGCACTCACGTCTTCTCAGGAGTGCTGTGCAACGAGAAACTCCTACATCTCAGTTGTCTGAACTATGGTCACCTCTGGAAAGCCAAGGATGGAAACCTTATGTTGAATCAAATAAGCCAACATTACCAGAGAAGTCAGAGGGATATATCCAGGTCTTTCTTGATGGAGGTTTGAACCAACAAAAGATGGGGATATGTGATGCAGTTGCTGTTGCAAAGATACTGAATGCTACTCTGGTGATC…
Chr01	GmHk_01G000220.1	2349554	2349802	-	-	hypothetical protein	GO:0003676;GO:0004523		PF13456			Retrotransposon protein	S	MSCLTRVRGWTSNLVINKIREYKSRDWNIKFTHTLGEGNNCANALAKMGSSSSSPMILWDNSPPQLHSHLLADALGVFFLRL	ATGAGTTGTCTAACTCGTGTTCGTGGTTGGACTAGTAATCTTGTGATCAACAAGATTAGAGAATATAAATCTAGAGATTGGAATATCAAATTTACCCACACTCTTGGAGAGGGTAACAATTGCGCAAATGCTCTTGCTAAGATGGGGTCATCATCTTCTTCGCCTATGATCTTATGGGATAATTCCCCACCTCAGCTTCATTCTCATTTGCTAGCTGATGCTTTAGGAGTCTTCTTCCTTAGATTGTAG
Chr01	GmHk_01G000221.1	2361015	2361975	+	PAS2_0	Very-long-chain (3R)-3-hydroxyacyl-CoA dehydratase PASTICCINO 2		IPR007482	PF04387			Protein tyrosine phosphatase-like	S	MAGFFSLLRRLYLTAYNFTFFFADLHKPLLFAQTAAVLEILHGIVGLVRSPVTATFPQIGSRLFLAWGILCLLPPYQSAGLSPRQVFHDCLLAVVFASCHVFSFLFVCLCILILTIIMENETAKTT	ATGGCGGGTTTTTTCTCCCTTCTCAGACGCCTCTACCTCACCGCCTACAACTTCACCTTCTTCTTTGCCGATTTACACAAGCCTTTGCTTTTTGCCCAAACCGCGGCTGTGCTTGAGATTCTTCATGGTATAGTAGGGCTGGTGCGGTCTCCAGTAACAGCAACCTTTCCACAGATAGGTTCGAGGTTGTTCCTGGCTTGGGGTATCTTGTGCTTGTTACCTCCCTATCAATCAGCTGGTCTATCACCGAGGCAAGTTTTTCATGATTGCTTGCTTGCTGTTGTGTTTGCATCTTGTCACGTTTTTTCATTTCTATTTGTCTGTTTATGTATTTTAATTTTAACTATCATAATGGAAAATGAAACTGCAAAAACCACATAA
Chr01	GmHk_01G000222.1	2365267	2370537	-	SVP_0	MADS-box protein SVP	GO:0000977;GO:0003677;GO:0003700;GO:0005634;GO:0006355;GO:0045944;GO:0046983	IPR002487;IPR033896;IPR036879	PF00319;PF01486	cd00265		Transcription factor	K	MAREKIQIKKIDNATARQVTFSKRRRGLFKKAEELSVLCDADVALIIFSSTGKLFEYSSSSMKEILERHHLHSKNLARMEQPSLELQLVENSNCSRLSKEVAEKSHQLRQLRGEDLQGLNIEELQQLEMSLETGLGRIIEKKGEKIMSEIADLQRKGMLLMEENERLKRHVAGIINGQRHGGAESENFVMDEGQSSESVTYVCNSTGLPQDYESSDTSLKLGLPYSG	ATGGCCAGGGAGAAGATTCAGATTAAGAAGATCGACAACGCCACCGCGAGGCAGGTCACGTTCTCCAAGCGTCGCAGAGGGCTCTTCAAGAAAGCTGAGGAGCTTTCGGTTCTGTGTGATGCTGATGTTGCCCTCATAATCTTCTCTTCCACTGGGAAACTCTTTGAGTACTCAAGCTCGAGCATGAAGGAAATACTTGAAAGGCATCATTTGCACTCAAAGAATCTAGCAAGGATGGAGCAACCATCTCTCGAGTTGCAGCTAGTTGAAAACAGCAACTGCTCCAGATTGAGCAAGGAAGTTGCCGAAAAGAGCCATCAACTAAGGCAGCTGAGAGGAGAGGATCTTCAAGGCTTAAACATAGAAGAATTGCAACAATTGGAGATGTCACTTGAAACT…
Chr01	GmHk_01G000223.1	2378878	2400048	+	KIN14B_1	Kinesin-like protein KIN-14B	GO:0003777;GO:0005524;GO:0007018;GO:0008017	IPR019821;IPR027417;IPR036961	PF00225			Kinesin family member	Z	MAEQGNRWSWDVAGFEPWKSPSPEQNDQKPTVPLARRNSTSSLVPPHSLASKVEGLREKVKVMRFHFHVYRVLLLSNSLAETEILVLSYFGESAYSGFCFRFGFICFVLDYFFWRISVTLKAVSVVLGNNKEYTEGNLARNDYLQLRQEASELQEYSNAKLDRVTRYLGVLAEKTHKLDQVALETEARMSSVINEKKKLFNDLLTSKGNIKVFCRTRPLFEDEGPSIVEFPDDYTIRVNTGDESLSNSKKEFEFDRVYGPHVGQADLFSDVQPMVQSALDGYNISLFAYGQTHSGKTHTMEGSSYDRGLYARCFEELFDLSNSDTTATSQCTFCITVFELYNEQIRDLLLESGKSLPKLCFGSPEYFIELMQEKVDNPLDFSRVLKAAFQSRGNNPLKI…	ATGGCGGAGCAGGGAAACCGTTGGAGCTGGGACGTCGCCGGCTTCGAGCCGTGGAAGTCGCCTTCGCCGGAGCAAAACGATCAGAAACCTACTGTGCCGTTGGCGAGGAGAAACTCCACCTCCTCCTTGGTTCCTCCGCATTCCTTGGCTTCCAAAGTTGAGGGATTAAGAGAAAAGGTTAAGGTAATGCGTTTTCATTTCCACGTGTATCGCGTTCTTCTTCTTTCGAATTCGCTAGCTGAAACTGAAATTTTGGTTTTGAGCTATTTCGGTGAGAGTGCTTATAGTGGTTTCTGCTTCCGCTTCGGTTTTATATGCTTCGTTTTGGATTATTTTTTTTGGCGAATTTCAGTGACTCTGAAAGCTGTTAGTGTTGTGTTGGGCAACAATAAAGAGTAT…
Chr01	GmHk_01G000223.2	2378878	2400048	+	KIN14B_1	Kinesin-like protein KIN-14B	GO:0003777;GO:0005524;GO:0007018;GO:0008017	IPR019821;IPR027417;IPR036961	PF00225			Kinesin family member	Z	MAEQGNRWSWDVAGFEPWKSPSPEQNDQKPTVPLARRNSTSSLVPPHSLASKVEGLREKVKVMRFHFHVYRVLLLSNSLAETEILVLSYFGESAYSGFCFRFGFICFVLDYFFWRISVTLKAVSVVLGNNKEYTEGNLARNDYLQLRQEASELQEYSNAKLDRVTRYLGVLAEKTHKLDQVALETEARMSSVINEKKKLFNDLLTSKGNIKVFCRTRPLFEDEGPSIVEFPDDYTIRVNTGDESLSNSKKEFEFDRVYGPHVGQADLFSDVQPMVQSALDGYNISLFAYGQTHSGKTHTMEGSSYDRGLYARCFEELFDLSNSDTTATSQCTFCITVFELYNEQIRDLLLESGKSLPKLCFGSPEYFIELMQEKVDNPLDFSRVLKAAFQSRGNNPLKI…	ATGGCGGAGCAGGGAAACCGTTGGAGCTGGGACGTCGCCGGCTTCGAGCCGTGGAAGTCGCCTTCGCCGGAGCAAAACGATCAGAAACCTACTGTGCCGTTGGCGAGGAGAAACTCCACCTCCTCCTTGGTTCCTCCGCATTCCTTGGCTTCCAAAGTTGAGGGATTAAGAGAAAAGGTTAAGGTAATGCGTTTTCATTTCCACGTGTATCGCGTTCTTCTTCTTTCGAATTCGCTAGCTGAAACTGAAATTTTGGTTTTGAGCTATTTCGGTGAGAGTGCTTATAGTGGTTTCTGCTTCCGCTTCGGTTTTATATGCTTCGTTTTGGATTATTTTTTTTGGCGAATTTCAGTGACTCTGAAAGCTGTTAGTGTTGTGTTGGGCAACAATAAAGAGTAT…
Chr01	GmHk_01G000224.1	2402970	2411906	+	GPI7	GPI ethanolamine phosphate transferase 2	GO:0003824;GO:0006506;GO:0051377	IPR017850;IPR037674	PF01663	cd16024		type i phosphodiesterase nucleotide pyrophosphatase	S	MSSISCTKLTLFSLAAVAIQFIGLSIFVFGFFPVKPLLSGYSGCESFRRPTCDNDGAANQSYASLSPDRRRFLYQEGSEIPPLYDRLVLMVIDGLPAEFVLGKKGQPPSKAFMEAMPYTQSLLASGMAVGYHAIAAAPTVTMPRLKAMVSGAIGGFLDVAFNFNTLAYLDDNLVAQFFKIGWKMVMHGDDTWLRLFPGLFARHDGVSSFFVKDTVQVDQNVSRHLGDELSRDDWNFLILHYLGLDHVGHIGGRNCVLMAPKLFEMDEVVKMIHINTLRNLENDQRKTLLVVVSDHGMTENGNHGGSSYEETDSIALFIGPKTHASGHSSSNHDTIFQVDIAPTIALLFGVPIPKNNIGVLISQMVDSLTDDQKLRALQLNSWQLFRLLQAQLPGLSCRN…	ATGTCTTCAATTTCATGCACGAAGCTGACACTGTTCAGCTTAGCAGCGGTTGCGATTCAGTTCATCGGTCTCTCCATCTTCGTTTTCGGCTTCTTCCCCGTCAAACCACTTCTCTCCGGTTACAGTGGCTGCGAGAGTTTCCGACGACCAACCTGCGATAACGATGGCGCTGCAAATCAGAGCTACGCGTCTCTCTCTCCAGATCGCCGCAGGTTTTTATATCAGGAAGGATCCGAGATTCCTCCTTTGTATGATCGACTTGTCTTAATGGTTATTGATGGTCTTCCAGCGGAATTTGTGCTTGGCAAGAAGGGTCAGCCTCCTAGCAAGGCTTTTATGGAAGCTATGCCATATACACAGTCATTATTGGCAAGTGGTATGGCTGTTGGATATCATGCA…
Chr01	GmHk_01G000225.1	2416406	2417131	-	-	hypothetical protein						NA	S	MNQDDTSKEVNYMANQNRRNFSQQRGNFSHNQDQGWRSHSGNKFNKDQEGPSNRPPNQGPNLYEWTTKLEDTLTQFMQSRENASGKGELEEEEKQEEGEQMREREISEKEEKNKKREIERVERKEIGERMTKSELARERKRKAVPNPVKEAPYPLVPSKKDNERYFALFLDIFKKLEIAIPFGEALQQKSLYIKFLKDLLTKKGKYINNESIMVEGNCSAVI	ATGAATCAAGATGATACATCTAAAGAGGTTAATTACATGGCAAATCAGAATAGGCGAAATTTTTCTCAGCAAAGGGGAAATTTTTCTCATAACCAAGATCAAGGTTGGCGATCACACTCTGGAAATAAGTTTAATAAAGACCAAGAAGGTCCATCCAATCGACCTCCCAACCAAGGCCCTAATTTGTATGAGTGGACCACCAAATTAGAGGACACACTGACTCAATTTATGCAATCAAGGGAGAATGCTAGTGGGAAAGGAGAGCTAGAAGAAGAGGAAAAACAGGAGGAAGGAGAGCAAATGAGAGAAAGAGAAATAAGTGAAAAAGAGGAGAAAAATAAAAAGAGAGAGATCGAACGAGTGGAGAGGAAAGAGATTGGAGAAAGGATGACTAAAAGT…
Chr01	GmHk_01G000226.1	2424413	2425210	+	-	hypothetical protein		IPR001623;IPR036869	PF00226	cd06257		DNAJ heat shock N-terminal domain-containing protein	O	MDPLRGSEPENPIATCLSMLSLRRFSACRDFARRLPPSDSVPRVLAVADVLSAADFYSVLQLRPSDGGNRDLARRQYAKLALLLDPTNPDKLPFSDEALARVQNAWHVLSHPERRALHDREQNANLNPNPMTASFWTACPYCWGLFEYEKRYEDRALLCHVCGKAFQGVPVKPPTKTGDAVMEGEELRQYYSCEASVPLMCYEVMGNNVLGGQNAAQYVYISDDNDNNDGGFVRNEGLQGSGEKRRMRVKTVANKVGGNRTRRHR	ATGGATCCGCTCAGAGGATCCGAACCCGAAAACCCTATTGCCACGTGTCTCTCCATGCTGTCCCTCCGCCGCTTCTCCGCGTGCCGCGACTTCGCCCGCCGCCTCCCCCCCTCCGACTCCGTCCCCCGCGTCCTAGCCGTCGCCGACGTCCTCTCCGCCGCCGACTTCTACTCCGTCCTACAGCTCCGCCCCTCCGACGGTGGCAACCGCGACCTCGCGCGGCGGCAGTACGCGAAGCTCGCGCTCCTCCTCGACCCAACGAACCCCGACAAGCTCCCGTTCTCCGACGAGGCCCTCGCACGTGTCCAGAATGCCTGGCACGTGCTCTCCCACCCCGAACGCCGCGCCCTCCACGACCGCGAGCAAAACGCAAACCTAAACCCGAACCCTATGACGGCG…
Chr01	GmHk_01G000227.1	2429814	2430863	+	BHLH131_0	Transcription factor bHLH131	GO:0046983	IPR036638	PF00010	cd00083;cd04873		Helix-loop-helix DNA-binding domain	S	MQHVRNYYNSDAQMIRGGFHQTFISRTYKTSFLKPRSKVEIKLLAAKKHSEAEKRRRMRINGQYETLRNILPNIIKKDKASVLAETIKQVKELKKKVSKLEQDSSSNPSKDVVKFPNGTDKLNLERCNNDEGIVKATLSCEDRLGLMSSISGALEQVKAKVVKAEIVSVGGRARSVLWVQGLGNDGTGTLKSKLRVAMQKPPKMQRFTQ	ATGCAACATGTTCGAAATTACTATAACTCAGATGCTCAAATGATAAGAGGTGGCTTCCATCAGACATTCATATCTAGGACATACAAAACCAGTTTCTTGAAGCCGAGATCAAAGGTAGAGATCAAACTATTGGCTGCTAAGAAACACAGTGAAGCAGAAAAGAGACGTAGAATGAGAATCAATGGTCAATATGAAACCCTCCGAAATATCCTCCCCAACATAATCAAAAAGGACAAGGCATCAGTATTGGCAGAGACTATCAAGCAAGTGAAGGAGTTGAAGAAAAAAGTATCAAAACTGGAACAAGATAGTTCTAGTAATCCATCAAAGGATGTTGTTAAGTTTCCTAATGGAACAGATAAGTTGAATTTGGAAAGATGTAACAACGACGAGGGCATA…
Chr01	GmHk_01G000228.1	2431800	2440007	-	UBP17_0	Ubiquitin carboxyl-terminal hydrolase 17	GO:0016579;GO:0036459	IPR002893;IPR028889;IPR038765	PF00443;PF01753			ubiquitin carboxyl-terminal hydrolase	O	MLVPGILGFPGLVYLVLALGFAVIRHVWRNAEAKREEEAVMMMRLVADADVTEMEVAEEAVAVASEVEYSSLAPVNGSRWYQCAMCCAPTTMRCSRCKAVRYCSGKCQISHWRQGHKDECCPPTTTMELKDENLSSRASVSKTESGLHEINGTHAGISSSNDSYSSLDPLVAARKSFDDNHRSRFAKPVCNDTTDDTSVASPHNKQTVNMKCSENIEVKDSSASKRSKSNHSNATDETRFKSKFPKTQSDTSHDEAANLGSHERRRKAAIVEKLAKDTSKCKTVPYLSGSSKYVVIDDVEEESHLPKYREARRSSSSSRERLSSATKGDFPSQSKCMETDNCHTLPAKVSAVPNLPQNVCSGLKISMQKVVQQFRSSKESRSNSISAENEMGFPYELFV…	ATGCTGGTGCCCGGGATTTTAGGGTTTCCGGGTCTGGTGTATCTAGTGTTGGCGTTGGGTTTCGCGGTGATTCGGCACGTGTGGAGAAATGCAGAGGCCAAGAGGGAGGAGGAGGCGGTGATGATGATGAGGTTGGTGGCAGATGCTGACGTGACGGAGATGGAGGTTGCTGAGGAGGCGGTGGCGGTGGCGTCGGAGGTGGAGTATTCTTCTCTGGCTCCGGTGAATGGTTCTCGGTGGTACCAATGTGCGATGTGTTGTGCACCCACTACCATGCGATGTTCTCGCTGCAAGGCCGTCAGATATTGTTCGGGTAAGTGTCAAATTAGTCACTGGAGACAAGGTCACAAGGACGAATGTTGTCCTCCAACTACCACCATGGAGCTCAAAGATGAAAAT…
Chr01	GmHk_01G000230.1	2453796	2454749	+	PUMP5_0	Mitochondrial uncoupling protein 5	GO:0022857;GO:0055085	IPR018108;IPR023395	PF00153			Mitochondrial	S	MGVKGFVEGGIASIIAGCSTHPLDLIKVRMQLQGENNLPKPVQNLRPALAFQTGSTLHVAAAVPPPRVGPISVGVRLVQQEGLAALFSGVSATVLRQTLYSTTRMGLYDVLKTKWTDSVTGTMPLGKKIEAGLIAGGIGAAVGNPADVAMVRMQADGRLPPAQRRNYKSVVDAITRMAKQEGVTSLWRGSSLTVNRAMLVTASQLASYDQFKEMILENGVMRDGLGTHVTASFAAGFVAAVASNPIDVIKTRVMNMRVEPGEAPPYAGALDCALKTVRAEGPMALYKGFIPTISRQGPFTVVLFVTLEQVRKLLKDF	ATGGGCGTCAAAGGTTTTGTTGAAGGAGGCATCGCTTCCATCATCGCAGGATGTTCCACACACCCACTTGATCTCATCAAGGTCCGCATGCAGCTCCAGGGTGAAAACAATTTGCCCAAACCGGTTCAAAATCTCCGACCCGCACTCGCCTTCCAAACCGGTTCGACCCTACACGTGGCAGCTGCAGTTCCGCCGCCCCGCGTGGGCCCCATCTCGGTTGGGGTTCGCCTCGTCCAGCAAGAGGGCCTCGCCGCCTTGTTCTCCGGCGTCTCCGCCACCGTCCTCCGCCAGACGCTCTACTCCACCACCCGCATGGGCCTCTACGACGTGCTCAAGACCAAGTGGACCGACTCCGTCACCGGCACCATGCCACTCGGAAAAAAGATCGAGGCCGGGCTC…
Chr01	GmHk_01G000231.1	2459964	2462999	+	ZMYM1_1	Zinc finger MYM-type protein 1		IPR012337;IPR025398	PF14291			zinc finger MYM-type protein 1-like	S	MDPIISGGSTMRPAGAYAQAHGQFLQLPPSPPPPSSSPLCLLFPPSPTPSISSSPRRHRRLLFHNPIAAADMRRFLVDRENIENVNVVQPEAELEPPLNNVVNEFNPNEIVRDPGRRKQINEYAPDIQDQVRRAYILKGPMQPDLSNFPRTQFGSQPGRAEHFGFEVFTKSGYRDWKHASQGLKGHVGSHNSLHNSCVKHYNDYNNQRQSVTSKFAKATKESEELYKIRLTCSLDCSRYLIAQGMAFRGHDESSTSLNKGNFREMVDWVKSQNEQVRDAFDRGGKNCKMTCGDIQKELATCCAHEVTKVIMEELGDRQFSVLIDESRDISVKEQMAVMLRFLNDKGNVVERFIALHHVTDTSSKSLKDALYGILDKYTLSISRIRGQGYDGASNMRGEF…	ATGGACCCTATAATCAGTGGCGGTTCTACCATGCGGCCAGCAGGGGCATATGCCCAGGCTCATGGGCAGTTCCTCCAACTCCCTCCGTCGCCGCCGCCTCCCTCCTCCTCTCCTCTGTGTCTTCTCTTCCCTCCATCGCCGACTCCTTCTATTTCCTCCTCTCCGCGCCGTCATCGCCGTCTTCTCTTCCATAATCCCATAGCAGCCGCAGATATGAGGAGATTTTTGGTTGATAGAGAAAATATTGAGAATGTGAATGTTGTGCAACCGGAAGCTGAATTAGAACCACCACTTAATAATGTGGTTAATGAGTTTAATCCAAATGAGATTGTGCGTGATCCAGGTCGTAGGAAACAAATTAATGAGTATGCTCCGGATATTCAAGACCAAGTGAGGAGG…
Chr01	GmHk_01G000232.1	2477601	2478409	-	-	hypothetical protein						NA	S	MDLVVFYWDDESEDQEIVSVFRKQEMGLGESMQRKMQGSKNKEIANVTKERNYIVYTKRKKISKFENEPRSLLNLEEVVEAMTLEKGKVKIEKFDGRDFSFWKMQIENYLYQKKLYQPLSGVKADDMKQEEWNLLD	ATGGACCTTGTTGTGTTCTACTGGGATGATGAGAGTGAAGATCAAGAAATTGTGTCCGTTTTTAGGAAACAAGAAATGGGGTTGGGAGAATCTATGCAGAGAAAGATGCAGGGGAGCAAGAACAAGGAGATTGCTAATGTAACAAAGGAGAGGAACTACATAGTCTACACTAAGAGAAAGAAGATTTCCAAGTTTGAGAATGAGCCAAGAAGTCTTCTCAATTTAGAGGAGGTAGTGGAAGCAATGACATTAGAAAAGGGAAAGGTAAAGATCGAGAAGTTCGATGGCAGAGATTTCAGCTTTTGGAAGATGCAGATAGAGAATTATCTATATCAGAAGAAGCTGTATCAACCCTTATCAGGGGTTAAGGCAGACGACATGAAGCAAGAAGAATGGAAC…
Chr01	GmHk_01G000233.1	2486912	2488475	-	-	hypothetical protein							R	MVKTRGLGRALGRIVARGLGRGDGDDSDGAPQHRRLTASARKRHLLVIVDDDVPAIPVDSPAVLEAEAAVVGDEPMDAVDEPEGFPGGTRDPSVLMEYADHVAASEHPELKLSSHGRKVHNLGRLVPAIEDMVAGTGLSPLIACSIDTGDHGLISSFVGEPLRSDEAVLLLVALLMVSPEVAMAEIGQCGGPYCWIYEHFSSIAECNADPNYDEVSPRACWWIATKKIVEKVSTTTYRTALLGACCCQIQTREGYAPVRLCPVHSCVHSWVSYDDVDDT	ATGGTTAAGACTAGAGGATTAGGCCGTGCGTTAGGTAGGATTGTTGCCAGAGGTCTAGGGAGAGGGGATGGTGATGATTCTGACGGTGCTCCCCAGCACCGAAGGCTGACCGCATCGGCACGCAAGCGACATCTACTTGTCATTGTTGACGATGATGTGCCTGCGATACCTGTAGACTCGCCTGCTGTACTAGAGGCAGAGGCTGCTGTAGTTGGGGATGAGCCCATGGATGCTGTAGATGAGCCTGAGGGATTTCCTGGTGGAACCAGGGACCCATCAGTGCTTATGGAGTATGCTGACCATGTTGCGGCCAGCGAACATCCTGAGTTGAAGTTATCCTCTCATGGAAGGAAGGTGCATAACTTAGGCAGGCTTGTTCCTGCAATTGAGGACATGGTT…
Chr01	GmHk_01G000234.1	2500348	2500611	-	-	hypothetical protein						-	-	MPSQVAYKHYLGPFHQQANEYEMTPFVDNHCHDKIIIFSTISCRSCCCPEKAQISGLPNNPDDRKPDHMPYTYGGDYAHCGYHSDTQ	ATGCCATCCCAGGTCGCATATAAACACTATCTAGGACCTTTCCACCAACAAGCTAATGAATATGAAATGACACCTTTTGTAGACAACCATTGCCACGACAAAATCATAATCTTTTCCACCATATCTTGCAGGTCTTGTTGCTGCCCTGAAAAAGCTCAAATTTCTGGTCTTCCAAATAACCCAGATGACAGAAAACCAGATCACATGCCATATACGTATGGGGGGGATTACGCTCACTGTGGTTACCATTCAGATACGCAATAA
Chr01	GmHk_01G000235.1	2501818	2503672	-	CURT1D_0	Protein CURVATURE THYLAKOID 1D, chloroplastic		IPR025564	PF14159			NA	S	MTHLTLQFKSLMSTTLSNLPNASSFLPKPKPKPSLPHPQTPLTHSAVLLSRSICLRNLLPKATSSEERSTGGSQFFNEKRDGVIILENVKEDNKNEFDKTVIEDTKEEELSDDGQGLSFDLMDKLNFDTDDTGSIVLYGGGALVALWLTSAVIGAIDSIPLIPKLLEVVGLAYTVWFTSRYLLFKQNRDELGAKIEELKGQIFGSEDN	ATGACTCATCTCACTCTTCAATTCAAATCCCTAATGTCTACCACTCTCTCGAACCTTCCTAACGCCTCCTCTTTTCTTCCTAAACCTAAACCTAAACCCTCTCTTCCTCACCCACAAACCCCTCTCACTCACTCCGCAGTACTTTTATCTCGGTCAATTTGCTTGAGGAATCTGTTGCCAAAGGCAACGTCTTCTGAAGAGCGATCCACTGGAGGAAGTCAATTTTTCAATGAGAAACGCGATGGTGTCATAATCCTGGAGAATGTTAAAGAGGATAATAAGAATGAGTTCGATAAAACGGTGATTGAAGACACAAAAGAAGAAGAGTTGTCTGATGATGGACAGGGTCTGTCATTTGATTTGATGGATAAGCTCAATTTTGATACAGATGACACTGGT…
Chr01	GmHk_01G000236.1	2506800	2507108	+	-	hypothetical protein						-	-	MIIALKSSSFSDNLCKKPPATLDELRAKVFKFIQMEKMTKGKEKVRVEPSRKPMKREVKIESDHNQRKSRADRPPRSKFSHYTLLIESRRRVGEEACITKLI	ATGATTATAGCACTGAAGTCAAGTTCCTTCTCGGACAACCTATGCAAGAAACCACCTGCAACATTGGATGAGTTAAGAGCAAAAGTTTTCAAATTCATTCAGATGGAAAAGATGACCAAAGGTAAGGAGAAAGTGCGCGTAGAGCCTTCCAGAAAACCAATGAAACGAGAGGTGAAAATCGAGAGCGACCATAATCAAAGAAAATCTAGAGCCGATAGACCGCCTCGGTCCAAGTTTAGCCATTACACCCTGCTAATAGAGAGTCGAAGGCGAGTAGGGGAAGAAGCTTGCATCACCAAGTTGATCTAG
Chr01	GmHk_01G000237.1	2526451	2528463	+	CYCD4-1_0	Cyclin-D4-1	GO:0005634	IPR006671;IPR013763;IPR036915;IPR039361	PF00134;PF02984	cd00043		(DC) complex that phosphorylates and inhibits members of the retinoblastoma (RB) protein family including RB1 and regulates the cell-cycle during G(1) S transition. Phosphorylation of RB1 allows dissociation of the transcription factor E2F from the RB E2F complex and the subsequent transcription of E2F target genes which are responsible for the progression through the G(1) phase. Hypophosphorylat…	D	MAHNSDSATSNLLLCSENSSTCFDDDLECCDAADGSNSRISHQFWDHHEGGGGGGSELLACFVAQSEETVRAMVEREREHLPRDDYLMRLRSGELDLGVRREAIDWICKAHSYFGFGPLSFCLAVNYLDRFLSVFDLPRGVTWTVQLLAVACLSIAAKMEEIKVPQSVDLQVGEPKFVFEARTIQKMELLVLSTLGWKMCAITPCSFIDYFLGKITCEQHPAKSSVSISVQLILGIIMGIDYLEFRPSEIAAAVAVSVLKELQAIEIDKAIIDLLVVEKWRVLKCVELIRDLSLINVAASLGSKVPYVPQSPIGVLDAGCLSYKSDELTVGSCPNSSHNISNPNPTKRSKPDGPSNGTSNS	ATGGCTCACAACTCAGACAGTGCCACCTCCAACCTTCTTCTCTGTTCGGAGAACAGCAGCACCTGCTTCGATGATGATTTGGAATGTTGTGATGCCGCAGATGGGTCCAACTCCAGAATCTCGCATCAGTTCTGGGACCACCATGAGGGTGGTGGTGGTGGTGGATCGGAGTTGTTGGCGTGTTTTGTGGCGCAGAGTGAGGAAACTGTGAGGGCTATGGTGGAGAGAGAGAGGGAGCATTTGCCGAGGGATGATTACTTGATGAGGCTGAGGAGTGGGGAGTTGGACTTGGGTGTTAGGAGGGAGGCTATTGATTGGATTTGTAAGGCTCATTCTTATTTTGGCTTTGGACCCTTGAGTTTTTGTTTAGCTGTGAACTACTTGGACCGCTTCCTATCG…
Chr01	GmHk_01G000238.1	2534900	2541799	-	PFK5_0	ATP-dependent 6-phosphofructokinase 5, chloroplastic	GO:0003872;GO:0005524;GO:0006002;GO:0006096	IPR012004;IPR022953;IPR035966	PF00365			phosphohexokinase	G	MPQTTTFVFDSSLSENPCFLMGSMSHMITLHGLTASSTRCSYAFNDSNSRFKALAVPTRVASVFAKVKSKSSTSSESNNSAIDFSDPDWKTKFKDDFEDRFRLPHVTDIFPDAVSMPSTFSPNMRNPTTSDFPGNYPLDEDWHGYINDNDRVLLKTIYYSSPTSAGAECIDPGCNWVEQWVHRAGPREKIYFHPEEVKAAIVTCGGLCPGLNDVIRQIVITLEIYGVTKIVGIPFGYRGFSDKELTEVPLSRKVVQNIHLSGGSLLGVSRGGPGVSEIVDNLKERGINMLFVLGGNGTHAGANAIHNECCKRRLKVSVIGVPKTIDNDILLMDKTFGFDTAVEEAQRAINSAYIEAHSAYHGIGIVKLMGRDSGFIAMHATLASGQIDICLIPEVPFNL…	ATGCCACAAACAACAACTTTTGTATTTGATTCATCACTCTCCGAAAACCCCTGTTTTTTGATGGGTAGCATGTCGCATATGATCACTCTTCATGGCCTAACAGCTTCTTCAACCCGTTGCTCCTACGCCTTTAATGACTCCAATTCTCGTTTCAAGGCATTGGCAGTTCCTACCAGAGTGGCTAGCGTCTTTGCCAAGGTTAAGAGTAAAAGTTCAACTTCCTCCGAGTCCAACAACTCCGCAATTGATTTCAGCGACCCTGATTGGAAAACCAAGTTCAAGGACGACTTTGAAGACCGTTTCAGACTCCCCCATGTCACTGATATCTTTCCGGATGCAGTTTCTATGCCCTCTACGTTCTCTCCCAACATGAGAAATCCTACGACTAGTGACTTTCCT…
Chr01	GmHk_01G000239.1	2547540	2548642	+	-	hypothetical protein						NA	S	MGHEGEYTEADILDLSAENCQDLEFDSSTWLSSTLDSQKQKTENGKRDCHYVKNNWNILAVPISAEELKIRSELGMQIERDLEEEIKEGIYHLALRLHRIYQQKKERSAKEACELYNKQARAVSEVNISIRMEGATKVEIKEINKEAAEKDSRNSRPQNVKEVKKVDWVKTLRAGSSPVCATRSSCVSSKNKNKKLGTDPNVFSNWKIHGGRGKNAGSTELVKQNASVDKKILQLVWKV	ATGGGTCATGAAGGAGAATACACCGAGGCAGATATCCTAGATTTATCAGCAGAGAATTGCCAAGATTTGGAATTTGACAGCAGTACTTGGCTCAGTTCAACGCTGGACTCACAAAAACAGAAAACTGAAAACGGTAAACGGGACTGCCATTACGTGAAGAACAATTGGAACATCCTCGCAGTTCCTATTTCGGCAGAGGAGCTGAAGATACGAAGTGAGCTAGGAATGCAGATTGAGAGGGACTTAGAAGAAGAGATCAAGGAGGGTATATACCACCTTGCTCTTCGGTTGCACCGGATTTACCAGCAGAAGAAGGAAAGAAGTGCAAAAGAAGCATGTGAACTCTACAATAAACAAGCTAGGGCAGTTTCTGAAGTGAACATAAGCATAAGAATGGAA…
Chr01	GmHk_01G000240.1	2555977	2557027	-	ZHD1_0	Zinc-finger homeodomain protein 1	GO:0003677	IPR006456;IPR009057	PF04770		TIGR01565;TIGR01566	ZF-HD homeobox protein	S	MEFEDQEEQEEELCMGGGAGYDPTQMKIPVAAEPVRSSSSNGGGCGRARYRECLKNHAVGIGGHALDGCGEFMAAGMEGTLDALKCAACSCHRNFHRKEADSSAVVSLSGGDPYFLPHHHHHHHPPPPQFSGYYRHPAGYLHMGGQLRSAVGGTLALPSTSGGGGTQSTREDQEDISNNPSAGGTGSKKRFRTKFTVEQKDKMLELAEKLGWRIQKHDEAVVQAFCDETGVKRHVLKVWMHNNKHTLVCYNGGA	ATGGAATTCGAGGATCAAGAGGAGCAGGAGGAGGAGCTGTGTATGGGTGGTGGAGCGGGCTACGATCCGACCCAGATGAAGATTCCGGTTGCGGCGGAGCCGGTGAGGAGCAGCAGCAGCAACGGCGGTGGCTGCGGAAGGGCGAGGTACAGGGAGTGTTTAAAGAACCACGCCGTCGGAATCGGAGGCCACGCGCTCGACGGCTGCGGCGAGTTCATGGCGGCGGGGATGGAGGGTACGCTGGACGCGCTGAAATGCGCCGCGTGCAGCTGCCACCGCAACTTCCACCGCAAGGAGGCGGATTCCTCCGCCGTGGTCTCCCTCTCCGGCGGGGACCCGTACTTTCTTCCCCATCATCACCACCACCACCACCCTCCGCCGCCGCAGTTTTCGGGGTAC…
Chr01	GmHk_01G000241.1	2599307	2599672	-	-	hypothetical protein		IPR005162	PF03732			Retrotransposon gag protein	S	MRSHQLTTWTSFLQVIEARFAHSPYEDLTEILFKLTQKGTVSDYLTQFETLANRIVGLSSPFLLSYFVSGLDLDIRRKVQALQPLTLVHAASLACLQEETLAEHRCGSRGRTFNGPSFSSL	ATGCGTAGCCATCAGCTCACCACCTGGACGAGCTTCCTGCAGGTAATCGAGGCCCGTTTCGCGCATTCCCCGTACGAGGACCTAACCGAAATTCTCTTCAAATTAACACAAAAAGGCACAGTTAGTGATTACCTGACTCAATTTGAAACTCTAGCCAATCGTATTGTCGGACTGTCGTCACCTTTCCTCCTAAGTTATTTTGTCTCGGGACTGGACCTTGACATTCGACGCAAGGTGCAGGCTCTTCAGCCTCTCACCTTGGTTCACGCCGCCAGTTTGGCCTGCCTTCAAGAAGAAACACTTGCAGAACATCGTTGTGGCTCTCGCGGTAGGACTTTCAATGGACCCAGTTTCTCTTCACTGTGA
Chr01	GmHk_01G000242.1	2604275	2608714	+	DTX27_2	Protein DETOXIFICATION 27	GO:0006855;GO:0015238;GO:0015297;GO:0016020;GO:0055085		PF01554	cd13132	TIGR00797	Mate efflux family protein	V	MPSKEDSPLVEAKLPLLEAHPLTDEREQDQSFPRRFWLESKRLWHIVGPSIFSRIASYSMLVITQAFAGHLGDLELAAISIANNVVVGFDFGLLLGMASALETLCGQAFGAKKYYMLGVYMQRSWIVLFICCIFLLPLYLFASPVLKLLGQPEELAELSGAVSIWMIPVHFAFAFQFPLQRFLQCQLKTAPIAWVSLVALVVHVFVSWLFVFKLQFGVVGAAATINFSWWVLTLGLFGYVVWGGCPHTWSGFSVEAFSGLWEFLKLSAAAGVMLCLENWYYKILIVMTGNLENAEIAVDALSICMTINSLELMIPLAFFAATGVRVANELGAGNGKGAKFATMVSVVTSVIIGLFFWMLILILHDKFGYIFSNSKAVLDEVNNLSLLLAFTILLNSVQP…	ATGCCAAGCAAAGAGGATTCACCTTTAGTAGAAGCAAAGCTTCCACTATTAGAAGCTCACCCTTTAACAGATGAAAGAGAACAAGACCAAAGTTTCCCACGAAGGTTTTGGCTTGAGTCAAAGAGGCTTTGGCACATAGTAGGCCCTTCAATTTTCAGCCGTATTGCATCCTACTCCATGTTAGTCATAACACAAGCCTTTGCAGGCCACCTTGGTGACCTCGAACTCGCTGCCATCTCCATTGCCAATAATGTCGTCGTTGGCTTCGACTTCGGCCTCTTGTTGGGTATGGCAAGCGCTTTAGAAACGCTATGCGGGCAAGCTTTTGGAGCGAAGAAGTACTACATGTTAGGCGTTTACATGCAGCGTTCATGGATCGTTCTTTTCATATGTTGCATC…
Chr01	GmHk_01G000242.2	2604275	2608714	+	DTX27_2	Protein DETOXIFICATION 27	GO:0006855;GO:0015238;GO:0015297;GO:0016020;GO:0055085		PF01554	cd13132		Mate efflux family protein	V	MPSKEDSPLVEAKLPLLEAHPLTDEREQDQSFPRRFWLESKRLWHIVGPSIFSRIASYSMLVITQAFAGHLGDLELAAISIANNVVVGFDFGLLLQFGVVGAAATINFSWWVLTLGLFGYVVWGGCPHTWSGFSVEAFSGLWEFLKLSAAAGVMLCLENWYYKILIVMTGNLENAEIAVDALSICMTINSLELMIPLAFFAATGVRVANELGAGNGKGAKFATMVSVVTSVIIGLFFWMLILILHDKFGYIFSNSKAVLDEVNNLSLLLAFTILLNSVQPVLSGVAVGSGWQSYVAYINLGCYYIIGVPLGILMGWVFNQGVMGIWAGMIFGGTATQTLILSLITIRCDWDKEAERAKLHLTKWTDPKQELN	ATGCCAAGCAAAGAGGATTCACCTTTAGTAGAAGCAAAGCTTCCACTATTAGAAGCTCACCCTTTAACAGATGAAAGAGAACAAGACCAAAGTTTCCCACGAAGGTTTTGGCTTGAGTCAAAGAGGCTTTGGCACATAGTAGGCCCTTCAATTTTCAGCCGTATTGCATCCTACTCCATGTTAGTCATAACACAAGCCTTTGCAGGCCACCTTGGTGACCTCGAACTCGCTGCCATCTCCATTGCCAATAATGTCGTCGTTGGCTTCGACTTCGGCCTCTTGCTTCAGTTTGGTGTTGTTGGTGCTGCTGCTACTATTAACTTCTCTTGGTGGGTCCTCACTTTGGGGCTTTTTGGCTACGTTGTTTGGGGTGGGTGCCCTCACACTTGGAGTGGTTTC…
Chr01	GmHk_01G000242.3	2604275	2608714	+	DTX27_2	Protein DETOXIFICATION 27	GO:0006855;GO:0015238;GO:0015297;GO:0016020;GO:0055085		PF01554			Mate efflux family protein	V	MPSKEDSPLVEAKLPLLEAHPLTDEREQDQSFPRRFWLESKRLWHIVGPSIFSRIASYSMLVITQAFAGHLGDLELAAISIANNVVVGFDFGLLLMIPLAFFAATGVRVANELGAGNGKGAKFATMVSVVTSVIIGLFFWMLILILHDKFGYIFSNSKAVLDEVNNLSLLLAFTILLNSVQPVLSGVAVGSGWQSYVAYINLGCYYIIGVPLGILMGWVFNQGVMGIWAGMIFGGTATQTLILSLITIRCDWDKEAERAKLHLTKWTDPKQELN	ATGCCAAGCAAAGAGGATTCACCTTTAGTAGAAGCAAAGCTTCCACTATTAGAAGCTCACCCTTTAACAGATGAAAGAGAACAAGACCAAAGTTTCCCACGAAGGTTTTGGCTTGAGTCAAAGAGGCTTTGGCACATAGTAGGCCCTTCAATTTTCAGCCGTATTGCATCCTACTCCATGTTAGTCATAACACAAGCCTTTGCAGGCCACCTTGGTGACCTCGAACTCGCTGCCATCTCCATTGCCAATAATGTCGTCGTTGGCTTCGACTTCGGCCTCTTGCTGATGATTCCTCTGGCTTTTTTTGCTGCAACAGGAGTGAGGGTTGCAAACGAGCTAGGAGCTGGGAACGGAAAAGGAGCCAAGTTTGCTACTATGGTATCTGTGGTGACATCGGTT…
Chr01	GmHk_01G000243.1	2635586	2638366	+	At1g67900_0	BTB/POZ domain-containing protein At1g67900		IPR011333;IPR027356	PF03000			BTB POZ domain-containing protein	S	MKFMKLGSRPDTFYTAEAVRSVSSEVSSDLIIQVKGSRYLLHKFPLLSKCLRLQKLCSESPESSSQHQIVQLPDFPGGVEAFELCAKFCYGISITLSPYNIVAARCGAEYLQMTEEVEKGNLIQKLEVFFNSCILRGWKDSIVSLQTTKASPMWSEDLGITSRCIEAVAAKVLSHPSKVSLSHSHSRRVRDDVSCNGNESVRHNKSGNKGWWAEDLAELSIDLYWRTMIAIKSGGKIPSNLIGDALKIYASRWLPNITNNGGHLKKQSVADSESDSVGEIASKHRLLLESVVSLLPAEKGAVSCGFLLKLLKASNILNASSSSKMELARRVGLQLEEATVNDLLIPSLSYTNDTVYDVELVRTILEQFMSQGQSPPTSPARSRFAFERRRSRSAENINL…	ATGAAGTTCATGAAACTAGGATCTCGTCCTGATACATTCTACACTGCAGAAGCAGTAAGGTCAGTCTCTTCTGAAGTTTCTAGTGACCTCATAATTCAAGTTAAGGGAAGTAGATATCTTCTTCACAAGTTTCCCTTGCTGTCAAAATGTTTGAGGCTACAAAAGCTATGTTCAGAATCTCCTGAATCATCTTCTCAGCACCAAATAGTCCAACTCCCTGATTTCCCTGGTGGGGTGGAGGCATTTGAGTTGTGTGCTAAGTTCTGCTATGGAATAAGCATCACTCTCAGCCCTTACAACATTGTGGCGGCACGATGTGGCGCCGAGTATCTTCAGATGACTGAGGAGGTTGAGAAGGGGAACTTAATTCAGAAGCTTGAGGTTTTCTTCAACTCATGC…
Chr01	GmHk_01G000244.1	2656735	2657067	+	-	hypothetical protein						Retrotransposon protein	S	MRMLRWMCGKTRQDKIRNRAIRERVRVAPIVEKMVENRLRWFLHVERRPVDSVVRRVDQMERRQTIRGRGRPKKTIREVIKKDLELNDLDRSMILDRTLWRKLIHVADPT	ATGAGGATGTTGCGGTGGATGTGTGGTAAGACTCGACAGGATAAAATTAGAAACAGAGCTATTAGAGAGAGGGTTAGAGTAGCGCCTATTGTAGAGAAGATGGTGGAAAATAGACTTAGGTGGTTTTTGCATGTAGAGAGAAGACCGGTAGACTCTGTAGTGAGGAGAGTAGACCAGATGGAGAGAAGACAAACAATTCGAGGCAGAGGAAGACCCAAAAAGACTATAAGAGAGGTTATCAAGAAGGATCTCGAACTTAATGATTTGGATAGAAGTATGATACTTGATAGAACATTATGGCGAAAGTTGATCCATGTAGCCGACCCCACCTAG
Chr01	GmHk_01G000245.1	2669840	2671045	+	ESR2_0	Ethylene-responsive transcription factor ESR2	GO:0003677;GO:0003700;GO:0006355	IPR016177;IPR036955	PF00847	cd00018		Ap2 domain containing protein	S	MEEAMRRLNGVAPILGPDPKADGGVVADNPKRSSAVNKRALREDGGGAMRYRGVRRRPWGRYAAEIRDPQSKERRWLGTFDTAEEAACAYDCAARAMRGLKARTNFVYPTSPQPSSATTEHFLPNFNNSNNFHKHSVFNHHHGNRHITGSTTCFDQPHAVDFLAPRNSSSSALNMLLFRDLVHSNPSLLSSSTTHNFHDQFYSKGASTFSSLPGVSSSSSSLVPCYSVNNSCGGSSSVKMNTHCGTNFSEKGDDGDGSGFFSRESSDSGLLEEIVNKFLPKTKPNKCESLPKMETFRNPQEESLLLPPLVSESTLVSTAQECYDDVTKKGFLKNDSLGVFSSDHQGFPMQQFDAFNGFSSVQAMALGNEQIMMNHAENCVVEDVFQYHELLNAFAIRMQ…	ATGGAGGAAGCAATGCGACGTCTAAACGGGGTAGCTCCGATTCTCGGACCCGACCCGAAAGCTGACGGAGGAGTCGTCGCTGATAACCCGAAGCGTTCCTCCGCCGTGAACAAGAGGGCCTTAAGAGAAGACGGCGGCGGAGCGATGAGGTACCGCGGCGTGAGGCGCAGGCCGTGGGGGCGTTACGCGGCGGAGATAAGGGACCCTCAGTCGAAGGAGCGGCGGTGGCTGGGAACCTTCGACACGGCCGAGGAAGCCGCCTGCGCCTACGACTGCGCCGCCAGAGCCATGCGCGGCCTCAAGGCTCGCACCAACTTCGTCTACCCAACTTCTCCGCAACCTTCTTCCGCCACCACCGAACACTTCTTACCTAACTTCAACAACAGCAACAACTTTCAC…
Chr01	GmHk_01G000246.1	2684975	2688546	+	FRS11_0	Protein FAR1-RELATED SEQUENCE 11		IPR004330	PF03101			protein FAR1-RELATED SEQUENCE 11-like	S	MDLSFLQSPHAQSFLRSSKAQYQMINNTMGEGNTSTRDMSTINNTMGEGSTSTRDMSTDKINVDLNEYPIEDISLENGYSGTVSEHFDHDIVANDNIEINEFAEEVDRDETYNETNIVPFVGQIFLSEEEAFAFYKRYAYQHGFSVRKGRFIKRNGIMRRRDFFCHREGRSSLKIIEPLKEQRNRESTRCECKAYLRISLQKSHDIFPSEWRVTKFVVEHNHVLLTQSEVRFLPANRTISEDDIERIFLLKEGGLSVRQLMCVIELEKNVKHGRPKRRRLKGGKELSHNMNTCGLFKDVGHNIVTCPLKENTQFSGHTNKKKKICKDANLNPILLPKEYVGNVACGMILQSLEKKADLSLWFDLDYYA	ATGGATTTGTCTTTTCTTCAAAGCCCACATGCACAGTCTTTTCTTCGTAGCTCAAAGGCACAATATCAGATGATAAATAACACAATGGGTGAAGGTAATACTAGTACTAGAGATATGAGCACCATAAATAACACAATGGGGGAAGGTAGTACTAGTACTAGAGATATGAGCACCGATAAAATAAATGTTGATTTAAATGAATATCCAATTGAAGATATTTCTTTAGAGAATGGTTATTCAGGAACAGTTAGTGAACATTTTGATCATGATATTGTGGCAAATGATAATATTGAGATAAATGAATTTGCAGAAGAAGTTGATAGAGATGAAACTTATAATGAGACAAATATTGTTCCTTTTGTTGGTCAAATTTTTCTTAGCGAGGAAGAAGCATTTGCA…
Chr01	GmHk_01G000247.1	2689576	2691672	-	DLO1_0	Protein DMR6-LIKE OXYGENASE 1	GO:0016491;GO:0055114	IPR026992;IPR027443	PF03171;PF14226			2OGFe(II) oxygenase	S	MKTFQLANESSSLLSLSPKFILPEDERPQLSEVTSLDSIPIIDLSDHSYDGNNHSSSLVVQKISQACEEYGFFQIVNHGIPEQVCNKMMTAITDLFNLPPEQTGQLYTTDHTKNTKLYNYYLNVEGGEKVKMWSECFSHYWYPIEDIIHLLPQEIGTQYGEAFSEYAREIGSLVRRLLGLLSIGLGIEEDFLLKIFGDQPRLRAQANFYPPCPDPELTLGLPVHTDFNALTIVLQSQVSGLQVIKDGKWIAVPVIPNAFVINLGDQIQVLSNGRFKSVHHRAVTNKLSPRVSMAMFYGPNVDTTIGPIQDLIDEEHPPRYRNYRFSEFLEEFFKQEGTRRMVKEVFELPC	ATGAAGACCTTTCAGTTAGCAAATGAGTCTTCTTCTCTACTTTCCTTATCTCCTAAATTTATCCTCCCAGAAGATGAAAGACCACAACTTTCAGAGGTTACTTCTCTGGACTCAATTCCCATAATTGATTTGAGTGATCACAGTTATGATGGTAATAACCATTCATCCTCATTGGTGGTTCAGAAGATTTCACAAGCTTGTGAGGAATATGGGTTCTTTCAGATAGTGAACCATGGTATTCCTGAACAAGTTTGCAACAAAATGATGACAGCAATTACTGACCTCTTTAATCTGCCTCCAGAGCAAACAGGACAGCTCTACACAACAGATCATACCAAGAACACAAAACTTTACAACTATTACCTTAATGTGGAGGGTGGAGAGAAGGTGAAAATGTGG…
Chr01	GmHk_01G000248.1	2692872	2695616	-	PIRL3	Plant intracellular Ras-group-related LRR protein 3	GO:0005515	IPR003591;IPR032675	PF13855			leucine Rich Repeat	S	MNPNPNTNDFPLLSHLLNHLDPQTHPPLPAELDQSLLTQFPHLNHPSVLSSLARHASTLNVTPTLSLLRTLGPRPDPSAVAAARARIADPHAREDGGEAHVVHALVRVDDTHEECVKQLRASEKKLLEAYAESVKGVVEEVSEGVVGVLKKAESEEVERVDLSGSHLRILPEAFGKIRGLVVLNLSQNQLEVIPDSIAGLQRLVELDVSSNVLESLPDSIGLLVNLKIFNVSANKLTALPESIALCRSLVELDASFNNLMCLPTNMGFGLVNLEKLLIHLNKIRFLPASIGEMKSLRHLDVHFNELHGLPQSIGKLTNLEYLNVSSNFSDMTELPETLGDLVNLRELDLSNNQIRALPYSFGRLEKLTKLNLDQNPIIVPPIEVVNQGAEAVKEFMAKW…	ATGAATCCCAATCCCAACACCAACGATTTCCCTCTCCTCTCCCACCTTCTTAACCACCTTGATCCCCAAACACACCCACCCCTCCCCGCAGAGCTAGACCAATCTCTATTAACCCAATTCCCTCACTTGAACCACCCCAGCGTGTTATCCTCACTCGCCCGTCACGCCTCCACCCTCAACGTCACCCCCACGCTCTCCCTCCTCCGCACCCTCGGCCCCCGCCCAGACCCCTCCGCTGTCGCCGCCGCGCGCGCCAGGATCGCCGACCCCCACGCGCGCGAGGACGGCGGCGAGGCCCACGTGGTCCACGCGCTGGTGCGCGTGGACGACACGCACGAGGAGTGCGTGAAGCAGCTGAGAGCCTCCGAGAAAAAGCTCCTCGAGGCCTATGCTGAATCG…
Chr01	GmHk_01G000249.1	2704742	2705548	-	-	hypothetical protein	GO:0005515		PF00564	cd06410		octicosapeptide Phox Bem1p (PB1) domain-containing protein	S	MFGPAQSTSEPPKSTLKFLCSYGGKILPRYPDGKLRYLGGHTRILAVDRSIPFSELLLKLEELCGASVRHLRCQLPSEDLDALVSITSDEDLANLIEEYDRVSSLKIRAFLSPPTPPRSPNKFSTAPSKSASISSSSASSSSSSSSYYSPTGSGESGRRYRAPALVSDCCVHQMSQPPAYPVGMEKSKSSGRNVPLPRYGYHHGNGGHVYLIHNGNHWQQRYGVV	ATGTTCGGACCAGCCCAATCCACTTCCGAACCTCCGAAATCCACTCTCAAATTCCTCTGTAGCTACGGCGGCAAAATCCTCCCTCGCTACCCCGACGGCAAGCTCCGCTACCTCGGCGGCCACACCCGCATCCTCGCCGTCGATCGCTCCATTCCATTCTCCGAGCTATTGCTGAAACTGGAGGAGCTCTGCGGCGCCTCCGTGAGGCACCTCCGCTGCCAATTACCCTCCGAAGACCTCGACGCTCTCGTCTCCATAACCTCCGACGAAGATCTCGCAAATCTCATCGAGGAATACGACCGTGTTTCGTCGCTGAAAATCAGAGCCTTCCTCTCGCCGCCCACGCCGCCGAGATCGCCGAACAAGTTTTCCACTGCTCCGTCGAAATCGGCGTCCATC…
Chr01	GmHk_01G000250.1	2721674	2722447	-	-	hypothetical protein		IPR025322	PF14009			Nucleotide-diphospho-sugar transferase	S	MLKRVVHSLGLVDKNPRRKSKVRGTMTPSDFGLRSKELYVRVVHQGGQQEVYHHAFPASKLTAKYPGMCVARAQVFMAPHQAVLRPEEHLLLGHKYVVISCTDVEKLKRKHPQQCKTKEHNGVVTSEVNIISECHLSGHKPKENDKLSVPNEMINTKITLSPTPSECKIHENGEVKEPNILGKEKVNAEKDVCQGGEDVEVHCSAKDFYVGKDKSSRYSRRKGIKVKKPFLPPLPKGRSYRGLGWQPSLVTVQELSL	ATGCTGAAGCGTGTTGTTCACTCGTTAGGCCTAGTGGATAAAAATCCAAGAAGAAAGAGCAAAGTGAGAGGAACCATGACACCTTCTGACTTTGGCTTGAGATCAAAGGAGTTATATGTGAGGGTAGTTCATCAGGGTGGACAACAAGAGGTGTATCACCATGCATTTCCGGCATCCAAGTTGACGGCGAAGTATCCCGGTATGTGTGTTGCAAGAGCACAAGTCTTCATGGCTCCTCATCAGGCAGTGCTAAGGCCTGAAGAGCATTTGCTGCTTGGTCACAAGTATGTCGTAATCTCGTGTACAGATGTGGAGAAACTGAAGCGTAAGCATCCTCAGCAATGCAAAACCAAAGAACATAATGGGGTGGTAACATCGGAGGTAAACATCATTAGTGAA…
Chr01	GmHk_01G000251.1	2723494	2731088	-	ABCB26_3	ABC transporter B family member 26, chloroplastic	GO:0005524;GO:0016021;GO:0016887;GO:0042626;GO:0055085	IPR003593;IPR011527;IPR017871;IPR027417;IPR036640	PF00005;PF00664			(ABC) transporter	V	MPLLLSRTPPSSFPLTPLRNARAPLITPSQKRFTLAATRIVLFTSRRRILASPPPPPKCASINGISVPNNPEASGEQQVYSASGLLDRIRKWVGFLPSILPGGRWWEFSGDVDVQVVAQPVTVWRALGKMWDLVARDRWVIFAAFSALIVAAVSEISIPHFLTASIFSAQSADLAVFHRNVRLLVLLCVASGICRSKPCMWDTRLLFWHRKHDSGEFLCLIFGDGDFYGSCKIHLSVKRMRETLYSSLLLQDISFFDNETVGDLTSRLGADCQQVSRVIGNDLNLIMRNVLQGGGSLIYLLILSWPLGLSTLVVCSILAAVMLRYGRYQKKAARLIQEVTASANDVAQETFSLIRTVRVYGTEEEEHGRYKWWLEKLADISLRQSAAYGVWNFSFNILY…	ATGCCTCTTCTTCTCTCACGCACCCCACCATCTTCTTTTCCTCTAACCCCTCTTAGAAACGCACGCGCGCCTCTAATCACACCCTCCCAGAAGCGCTTCACTCTCGCCGCAACGCGAATCGTTCTCTTCACTTCCCGCCGCCGCATTCTAGCATCCCCTCCTCCTCCTCCCAAGTGCGCCTCCATCAACGGAATCTCTGTCCCGAACAACCCAGAAGCTTCCGGAGAACAACAAGTCTATAGTGCTTCCGGGCTTCTCGACCGGATTCGGAAATGGGTCGGGTTTTTACCGTCGATTCTTCCCGGCGGACGGTGGTGGGAGTTCTCCGGCGACGTCGACGTTCAGGTGGTGGCGCAGCCGGTGACCGTGTGGCGCGCGCTCGGGAAAATGTGGGACCTT…
Chr01	GmHk_01G000251.2	2723494	2731088	-	ABCB26_3	ABC transporter B family member 26, chloroplastic	GO:0005524;GO:0016021;GO:0016887;GO:0042626;GO:0055085	IPR003593;IPR011527;IPR017871;IPR027417;IPR036640	PF00005;PF00664			(ABC) transporter	V	MPLLLSRTPPSSFPLTPLRNARAPLITPSQKRFTLAATRIVLFTSRRRILASPPPPPKCASINGISVPNNPEASGEQQVYSASGLLDRIRKWVGFLPSILPGGRWWEFSGDVDVQVVAQPVTVWRALGKMWDLVARDRWVIFAAFSALIVAAVSEISIPHFLTASIFSAQSADLAVFHRNVRLLVLLCVASGICSGIRGCFFGIANMILVKRMRETLYSSLLLQDISFFDNETVGDLTSRLGADCQQVSRVIGNDLNLIMRNVLQGGGSLIYLLILSWPLGLSTLVVCSILAAVMLRYGRYQKKAARLIQEVTASANDVAQETFSLIRTVRVYGTEEEEHGRYKWWLEKLADISLRQSAAYGVWNFSFNILYHSTQVIAVLFGGMSILAGHITAEKLTK…	ATGCCTCTTCTTCTCTCACGCACCCCACCATCTTCTTTTCCTCTAACCCCTCTTAGAAACGCACGCGCGCCTCTAATCACACCCTCCCAGAAGCGCTTCACTCTCGCCGCAACGCGAATCGTTCTCTTCACTTCCCGCCGCCGCATTCTAGCATCCCCTCCTCCTCCTCCCAAGTGCGCCTCCATCAACGGAATCTCTGTCCCGAACAACCCAGAAGCTTCCGGAGAACAACAAGTCTATAGTGCTTCCGGGCTTCTCGACCGGATTCGGAAATGGGTCGGGTTTTTACCGTCGATTCTTCCCGGCGGACGGTGGTGGGAGTTCTCCGGCGACGTCGACGTTCAGGTGGTGGCGCAGCCGGTGACCGTGTGGCGCGCGCTCGGGAAAATGTGGGACCTT…
Chr01	GmHk_01G000251.3	2723494	2731088	-	ABCB26_3	ABC transporter B family member 26, chloroplastic	GO:0005524;GO:0016021;GO:0016887;GO:0042626;GO:0055085	IPR003593;IPR011527;IPR017871;IPR027417;IPR036640	PF00005;PF00664			(ABC) transporter	V	MPLLLSRTPPSSFPLTPLRNARAPLITPSQKRFTLAATRIVLFTSRRRILASPPPPPKCASINGISVPNNPEASGEQQVYSASGLLDRIRKWVGFLPSILPGGRWWEFSGDVDVQVVAQPVTVWRALGKMWDLVARDRWVIFAAFSALIVAAVSEISIPHFLTASIFSAQSADLAVFHRNVRLLVLLCVASGICRSKPCMWDTRLLFWHRKHDSGEFLCLIFGDGDFYGSCKIHLSVKRMRETLYSSLLLQDISFFDNETVGDLTSRLGADCQQVSRVIGNDLNLIMRNVLQGGGSLIYLLILSWPLGLSTLVVCSILAAVMLRYGRYQKKAARLIQEVTASANDVAQETFSLIRTVRVYGTEEEEHGRYKWWLEKLADISLRQSAAYGVWNFSFNILY…	ATGCCTCTTCTTCTCTCACGCACCCCACCATCTTCTTTTCCTCTAACCCCTCTTAGAAACGCACGCGCGCCTCTAATCACACCCTCCCAGAAGCGCTTCACTCTCGCCGCAACGCGAATCGTTCTCTTCACTTCCCGCCGCCGCATTCTAGCATCCCCTCCTCCTCCTCCCAAGTGCGCCTCCATCAACGGAATCTCTGTCCCGAACAACCCAGAAGCTTCCGGAGAACAACAAGTCTATAGTGCTTCCGGGCTTCTCGACCGGATTCGGAAATGGGTCGGGTTTTTACCGTCGATTCTTCCCGGCGGACGGTGGTGGGAGTTCTCCGGCGACGTCGACGTTCAGGTGGTGGCGCAGCCGGTGACCGTGTGGCGCGCGCTCGGGAAAATGTGGGACCTT…
Chr01	GmHk_01G000251.4	2723494	2731088	-	ABCB26_3	ABC transporter B family member 26, chloroplastic	GO:0005524;GO:0016021;GO:0016887;GO:0042626;GO:0055085	IPR003593;IPR011527;IPR017871;IPR027417;IPR036640	PF00005;PF00664			(ABC) transporter	V	MPLLLSRTPPSSFPLTPLRNARAPLITPSQKRFTLAATRIVLFTSRRRILASPPPPPKCASINGISVPNNPEASGEQQVYSASGLLDRIRKWVGFLPSILPGGRWWEFSGDVDVQVVAQPVTVWRALGKMWDLVARDRWVIFAAFSALIVAAVSEISIPHFLTASIFSAQSADLAVFHRNVRLLVLLCVASGICSGIRGCFFGIANMILVKRMRETLYSSLLLQDISFFDNETVGDLTSRLGADCQQVSRVIGNDLNLIMRNVLQGGGSLIYLLILSWPLGLSTLVVCSILAAVMLRYGRYQKKAARLIQEVTASANDVAQETFSLIRTVRVYGTEEEEHGRYKWWLEKLADISLRQSAAYGVWNFSFNILYHSTQASVVQHVNFVVHPGEVVAIVGLS…	ATGCCTCTTCTTCTCTCACGCACCCCACCATCTTCTTTTCCTCTAACCCCTCTTAGAAACGCACGCGCGCCTCTAATCACACCCTCCCAGAAGCGCTTCACTCTCGCCGCAACGCGAATCGTTCTCTTCACTTCCCGCCGCCGCATTCTAGCATCCCCTCCTCCTCCTCCCAAGTGCGCCTCCATCAACGGAATCTCTGTCCCGAACAACCCAGAAGCTTCCGGAGAACAACAAGTCTATAGTGCTTCCGGGCTTCTCGACCGGATTCGGAAATGGGTCGGGTTTTTACCGTCGATTCTTCCCGGCGGACGGTGGTGGGAGTTCTCCGGCGACGTCGACGTTCAGGTGGTGGCGCAGCCGGTGACCGTGTGGCGCGCGCTCGGGAAAATGTGGGACCTT…
Chr01	GmHk_01G000252.1	2734458	2734904	+	RPL27AC_0	60S ribosomal protein L27a-3	GO:0003735;GO:0005840;GO:0006412;GO:0015934	IPR021131;IPR030878;IPR036227	PF00828			Binds to the 23S rRNA (By similarity)	J	MTTRFKKNRKKRGHVSAGHGRIGKHRKHPGGRGNAGGMHHHRILFDKYHPGFFGKVGMRYFHKLRNKFYSPIVNIDKLWSLIPQDAKDKALKSKDTAPLIDVTQHGYFKVLGKGVLPQNQPIVVKAKLISKIAEKKIKEAGGAVLLTA	ATGACAACCCGATTTAAGAAGAACCGCAAGAAGCGCGGCCACGTCAGCGCCGGCCACGGCCGTATTGGAAAGCACCGCAAGCACCCCGGCGGCCGGGGAAATGCCGGCGGCATGCACCACCACAGGATCCTCTTCGACAAGTACCACCCGGGGTTCTTCGGGAAGGTAGGGATGAGGTACTTTCATAAGCTCCGCAACAAATTCTACTCCCCCATCGTCAACATCGACAAGCTATGGTCTCTGATACCCCAAGACGCGAAGGACAAAGCCCTAAAATCGAAGGACACTGCCCCTCTAATCGACGTCACTCAGCACGGGTACTTCAAGGTTCTCGGAAAAGGTGTGCTGCCCCAAAACCAGCCCATTGTTGTGAAGGCCAAGCTTATTTCGAAGATCGCG…
Chr01	GmHk_01G000253.1	2738089	2745636	-	DTX29_0	Protein DETOXIFICATION 29	GO:0006855;GO:0015238;GO:0015297;GO:0016020;GO:0055085		PF01554	cd13132	TIGR00797	Mate efflux family protein	V	MKHSDGNSSTQPLLTARADEPHQIHPHPAETTAVFSAGTPDIAPITGAGDFYREFMVESKKLWYLAGPAIFSFVSKYSLGAFTQIFAGHVGTIDLAAVSVENSLIAGFSYGIMLGMGSALETLCGQAVGAGKLDMLGVYMQRSWVLLLSTACVLCPLYIFAGQVLKLIGQDTEISEAAGTFAIWMIPQLFAYALNFPVAKFLQAQSKVMVIAAIAGMAMVLHPVLSWLLMVKLEWGLVGAAVVLNGSWWFVVVAQLVYVFGGWCWPAWNGFSWEAFRSLWGFFRLSLASAVMLCLETWYFMALILFAGYLKNAQVSVDAFSICMNILGWTIMVSFGMNAATSVRISNELGARHPRTALFSLVVAVITSVLIGVLLAIVLMISRNEYPSLFSNDTEVQDL…	ATGAAACACTCAGATGGCAACTCCTCCACACAGCCACTTCTCACGGCCAGGGCAGACGAACCCCATCAAATCCACCCACACCCAGCAGAAACAACCGCAGTTTTTAGCGCCGGCACCCCTGACATAGCTCCGATCACCGGCGCTGGCGACTTCTATAGGGAATTCATGGTGGAGTCAAAGAAGCTCTGGTACCTCGCCGGCCCCGCCATCTTCTCCTTCGTCTCAAAGTACTCCCTCGGCGCCTTCACTCAAATCTTTGCCGGCCACGTTGGCACCATTGACCTCGCCGCCGTCTCCGTTGAAAACTCCCTCATCGCCGGCTTCTCCTACGGCATAATGCTAGGGATGGGAAGCGCGTTGGAAACGCTGTGCGGACAAGCGGTGGGGGCAGGGAAGCTG…
Chr01	GmHk_01G000254.1	2748096	2750768	+	AMOH	Histamine oxidase	GO:0005507;GO:0008131;GO:0009308;GO:0048038;GO:0055114	IPR036460	PF01179			amine oxidase	Q	MILIVLDFLLIKLNLKVGVSVMLLRDINQLNASKEDEKNVIQYQILTKNNDGKIETEVKLTGILSLGALQPGENRKYGTTIAPGLYAPSEGMFWLTHTSMFLARVTLPPISNFILKKKNCMKIYCLCSLHSVTEVTVLFPLQVVEVDVKVEEPGKNNVYNNAFYAEEKLLKSELEAQCVIVTLYLLDTGSNTRKVPGSNCLPLAGSEAKFLRRSAFLKHNLWVTPYAPDKMHPGGEFSNQNPRNYSRYVFGVTHIPRLEDWLVMPVERIGFTLMPHGFFNCSPAVDFPPSASDLDDKENGMSAKPIQNGMVALL	ATGATATTAATTGTTTTGGATTTTCTCCTCATAAAACTGAATTTGAAGGTTGGAGTGTCTGTGATGTTGTTGAGGGATATTAATCAATTAAATGCGAGTAAGGAGGATGAAAAAAATGTTATCCAATATCAAATTCTTACTAAAAACAATGATGGAAAAATAGAAACTGAGGTCAAGCTCACGGGAATTCTCAGTTTAGGAGCATTGCAACCAGGTGAAAATCGAAAATATGGCACGACTATTGCACCTGGATTATATGCACCTTCTGAAGGAATGTTTTGGTTGACTCATACTTCAATGTTTTTAGCTCGTGTAACATTGCCGCCCATCTCAAATTTTATTCTTAAGAAAAAAAATTGCATGAAAATCTACTGTTTATGTAGCTTGCATTCTGTAACA…
Chr01	GmHk_01G000256.1	2755814	2757649	+	-	hypothetical protein	GO:0005515	IPR016024				Armadillo beta-catenin repeat family protein	U	MASSEQEKRVEDELSYPIMVAERVRSAVDESDSFKLECSEVGKHVDRILQMLRTLVRFATATATSAATPPLYDRPIRRVAAETAKNLERALALVSKCKRRSILRRVVSIVGAADFLKVLTHLDASGGDMKWLLSILDGGGGIVVSLPPIASNDPILSWVWSFIASIQMGQLNDRIEAANELASLAQDNDRNKKIIVEECGVPPLLKLFKEGTSPLAQIAAANALCHLANDLDRVRVIVSEHGVPAVVQILSDSPMRVQTLAANLVARMAKHDPVAQEDFARENAIRPLVTLLSFDTFVDDPLGHLGKQSIHSIVQINKELGKGGQGGWKFASSYSNSYLFMEGSSRGGNHRKERGNEDPAVKLQLKVSCAEALWMLARGSVTNSRKITETKGMLCLAKI…	ATGGCATCATCGGAGCAGGAGAAGCGAGTGGAGGACGAGTTGTCGTACCCTATTATGGTGGCGGAGCGAGTTCGCTCGGCGGTGGACGAGTCCGACTCGTTCAAACTCGAGTGCTCCGAGGTTGGGAAGCACGTCGATCGCATCCTCCAAATGCTCCGAACCCTCGTTCGCTTCGCCACCGCCACCGCCACCTCCGCCGCCACGCCGCCCCTCTACGATCGTCCCATCCGCCGCGTCGCCGCGGAGACGGCGAAAAACCTCGAGCGCGCCCTCGCCCTCGTCAGCAAGTGCAAGCGCCGCAGCATCCTCCGCCGCGTCGTCTCCATCGTCGGCGCCGCCGATTTCCTGAAGGTCCTCACCCACCTGGACGCCTCCGGCGGCGACATGAAGTGGCTCCTC…
Chr01	GmHk_01G000257.1	2759444	2761751	-	At1g70590_1	F-box protein At1g70590	GO:0005515	IPR006597;IPR011990;IPR036047	PF00646;PF08238			Sel1 domain protein repeat-containing protein	S	MKHRTWPRAFSSLPFSNRSEFSAARSTRLCARPPPPSPPGVGGEFSSLPYDVLAKIAASFDDPNLRAASLVCRAWCEALRPLREAMVLLRWGKRFKHGRRGVRPNVDKALDSFTKAAVRGSALAMVDAGLIYWERGEKPKAMELYLKAAELGNPSAQCNLGLSYLQAEPPNTEKAVKWLRKASVCGNVRAQYQLALCLHRSGGRVRSNLKEAVVALSFSSPLLILSEVVNLFFQGCFFLEQAKWYMKAAEGGYVRAMYNISLCFSFGEGLASNHQLARKWMKRAADRGHSKAQFEHGLALFSEGDMMKAVVYLELATRAGEKGAAHVKNAVLHRLSSVSRDHAMHLANSWRALPSS	ATGAAGCACCGAACATGGCCTCGCGCCTTCTCCTCCCTCCCTTTCTCCAACCGTTCCGAATTCTCCGCCGCACGCTCCACGCGCCTCTGTGCGCGTCCTCCTCCGCCGTCCCCTCCCGGCGTCGGCGGCGAATTCTCGTCGCTCCCCTACGACGTGCTGGCGAAGATCGCCGCCTCCTTCGACGACCCCAATCTCCGCGCGGCGTCGCTGGTGTGTCGCGCGTGGTGCGAGGCGCTGCGGCCGCTGCGGGAGGCCATGGTGCTGCTCCGCTGGGGGAAGCGCTTCAAGCACGGCCGCCGCGGCGTCCGCCCCAACGTCGACAAGGCCCTAGACTCCTTCACCAAAGCCGCCGTGCGCGGCTCCGCCCTCGCCATGGTCGACGCCGGCCTCATCTACTGG…
Chr01	GmHk_01G000257.2	2759444	2761751	-	At1g70590_1	F-box protein At1g70590	GO:0005515	IPR006597;IPR011990;IPR036047	PF00646;PF08238			Sel1 domain protein repeat-containing protein	S	MKHRTWPRAFSSLPFSNRSEFSAARSTRLCARPPPPSPPGVGGEFSSLPYDVLAKIAASFDDPNLRAASLVCRAWCEALRPLREAMVLLRWGKRFKHGRRGVRPNVDKALDSFTKAAVRGSALAMVDAGLIYWERGEKPKAMELYLKAAELGNPSAQCNLGLSYLQAEPPNTEKAVKWLRKASVCGNVRAQYQLALCLHRSGGRVRSNLKEAAKWYMKAAEGGYVRAMYNISLCFSFGEGLASNHQLARKWMKRAADRGHSKAQFEHGLALFSEGDMMKAVVYLELATRAGEKGAAHVKNAVLHRLSSVSRDHAMHLANSWRALPSS	ATGAAGCACCGAACATGGCCTCGCGCCTTCTCCTCCCTCCCTTTCTCCAACCGTTCCGAATTCTCCGCCGCACGCTCCACGCGCCTCTGTGCGCGTCCTCCTCCGCCGTCCCCTCCCGGCGTCGGCGGCGAATTCTCGTCGCTCCCCTACGACGTGCTGGCGAAGATCGCCGCCTCCTTCGACGACCCCAATCTCCGCGCGGCGTCGCTGGTGTGTCGCGCGTGGTGCGAGGCGCTGCGGCCGCTGCGGGAGGCCATGGTGCTGCTCCGCTGGGGGAAGCGCTTCAAGCACGGCCGCCGCGGCGTCCGCCCCAACGTCGACAAGGCCCTAGACTCCTTCACCAAAGCCGCCGTGCGCGGCTCCGCCCTCGCCATGGTCGACGCCGGCCTCATCTACTGG…
Chr01	GmHk_01G000258.1	2772397	2772720	-	SMR6_0	Cyclin-dependent protein kinase inhibitor SMR6						NA	S	MGFSEKPQVEESDSTRKWVIAGIPSRAPLKPIFTTKEEEKDEEGDLEECSTTPKGEEAKIPTTLKCPPAPRKRKPSLKCNYRGGGAREFFTPPDLETVFIRHVERTS	ATGGGGTTCTCAGAGAAGCCACAAGTGGAAGAGTCAGATAGTACTAGAAAATGGGTCATCGCTGGAATCCCTTCACGAGCGCCATTGAAGCCAATATTTACCACCAAAGAAGAAGAAAAAGATGAAGAAGGTGACTTGGAAGAGTGTTCAACGACACCAAAAGGGGAAGAAGCAAAGATTCCAACCACGTTGAAGTGTCCACCAGCTCCTAGGAAGAGAAAACCTTCTTTGAAGTGCAACTATCGTGGTGGTGGAGCAAGAGAGTTCTTCACTCCACCGGACTTAGAAACTGTGTTTATACGCCATGTTGAAAGGACTAGCTAA
Chr01	GmHk_01G000259.1	2792635	2798771	-	GGAT2_3	Glutamate--glyoxylate aminotransferase 2	GO:0003824;GO:0009058;GO:0030170	IPR015421;IPR015422;IPR015424	PF00155	cd00609		aminotransferase	E	MPPKPLDYGSINENVKKSQYAVRGELYLRASELQKEGKKIIFTNVGNPHALGQKPLSFPRQVVALCQAPFLLDDPNVGLLFPADAIARAKHYLSLTSGGLGAYSDSRGLPGVRKEVAEFILRRDGYPTDPELIYLTDGASKGVMQILNTIIRGQDDGILVPVPQYPLYSATIALLGGTLVPYYLEETANWGLDVNELRQSVEQARFKGITVKAMVIINPGNPTGQCLSEANLREVLQFCYQENLALLGDEVYQTNIYQDERPFISSRKVLMDLGPPISKEVQLISFHSVSKGYYGECGQRGGYFEMTNIPPETVDEIYKVASISLSPNVPAQIFMGVMLHPPQPGDISYDKFVRESTGILESLRRRARLMTDGFNSCRNVVCNFTEGAMYSFPQIRLPP…	ATGCCACCAAAGCCTTTAGACTATGGGTCAATAAATGAAAACGTGAAGAAGAGTCAATATGCTGTCAGAGGTGAATTATACCTTCGAGCTTCTGAGCTTCAGAAAGAGGGCAAAAAGATTATATTTACTAATGTTGGCAACCCACATGCATTGGGACAGAAACCACTGAGCTTCCCTCGTCAGGTTGTTGCTTTGTGCCAAGCTCCATTCCTACTTGATGATCCTAATGTTGGACTGCTATTCCCTGCTGATGCAATTGCAAGAGCTAAACACTATCTTTCATTGACCTCGGGCGGTTTAGGCGCTTATAGTGACTCCCGCGGCCTTCCAGGAGTGAGGAAGGAAGTGGCTGAGTTCATACTCAGGCGTGATGGTTATCCAACTGATCCAGAACTCATA…
Chr01	GmHk_01G000259.2	2792635	2798771	-	GGAT2_3	Glutamate--glyoxylate aminotransferase 2	GO:0003824;GO:0009058;GO:0030170	IPR015421;IPR015422;IPR015424	PF00155	cd00609		aminotransferase	E	MPPKPLDYGSINENVKKSQYAVRGELYLRASELQKEGKKIIFTNVGNPHALGQKPLSFPRQVVALCQAPFLLDDPNVGLLFPADAIARAKHYLSLTSGGLGAYSDSRGLPGVRKEVAEFILRRDGYPTDPELIYLTDGASKGVMQILNTIIRGQDDGILVPVPQYPLYSATIALLGGTLVPYYLEETANWGLDVNELRQSVEQARFKGITVKAMVIINPGNPTGQCLSEANLREVLQFCYQENLALLGDEVYQTNIYQDERPFISSRKVLMDLGPPISKEVQLISFHSVSKGYYGECGQRGGYFEMTNIPPETVDEIYKVASISLSPNVPAQIFMGVMLHPPQPGDISYDKFVRESTGILESLRRRARLMTDGFNSCRNVVCNFTEGAMYSFPQIRLPP…	ATGCCACCAAAGCCTTTAGACTATGGGTCAATAAATGAAAACGTGAAGAAGAGTCAATATGCTGTCAGAGGTGAATTATACCTTCGAGCTTCTGAGCTTCAGAAAGAGGGCAAAAAGATTATATTTACTAATGTTGGCAACCCACATGCATTGGGACAGAAACCACTGAGCTTCCCTCGTCAGGTTGTTGCTTTGTGCCAAGCTCCATTCCTACTTGATGATCCTAATGTTGGACTGCTATTCCCTGCTGATGCAATTGCAAGAGCTAAACACTATCTTTCATTGACCTCGGGCGGTTTAGGCGCTTATAGTGACTCCCGCGGCCTTCCAGGAGTGAGGAAGGAAGTGGCTGAGTTCATACTCAGGCGTGATGGTTATCCAACTGATCCAGAACTCATA…
Chr01	GmHk_01G000259.3	2792635	2798771	-	GGAT2_3	Glutamate--glyoxylate aminotransferase 2	GO:0003824;GO:0009058;GO:0030170	IPR015421;IPR015422;IPR015424	PF00155	cd00609		aminotransferase	E	MPPKPLDYGSINENVKKSQYAVRGELYLRASELQKEGKKIIFTNVGNPHALGQKPLSFPRQVVALCQAPFLLDDPNVGLLFPADAIARAKHYLSLTSGGLGAYSDSRGLPGVRKEVAEFILRRDGYPTDPELIYLTDGASKGVMQILNTIIRGQDDGILVPVPQYPLYSATIALLGGTLVPYYLEETANWGLDVNELRQSVEQARFKGITVKAMVIINPGNPTGQCLSEANLREVLQFCYQENLALLGDEVYQTNIYQDERPFISSRKVLMDLGPPISKEVQLISFHSVSKGYYGECGQRGGYFEMTNIPPETVDEIYKVASISLSPNVPAQIFMGVMLHPPQPGDISYDKFVRESTGILESLRRRARLMTDGFNSCRNVVCNFTEGAMYSFPQIRLPP…	ATGCCACCAAAGCCTTTAGACTATGGGTCAATAAATGAAAACGTGAAGAAGAGTCAATATGCTGTCAGAGGTGAATTATACCTTCGAGCTTCTGAGCTTCAGAAAGAGGGCAAAAAGATTATATTTACTAATGTTGGCAACCCACATGCATTGGGACAGAAACCACTGAGCTTCCCTCGTCAGGTTGTTGCTTTGTGCCAAGCTCCATTCCTACTTGATGATCCTAATGTTGGACTGCTATTCCCTGCTGATGCAATTGCAAGAGCTAAACACTATCTTTCATTGACCTCGGGCGGTTTAGGCGCTTATAGTGACTCCCGCGGCCTTCCAGGAGTGAGGAAGGAAGTGGCTGAGTTCATACTCAGGCGTGATGGTTATCCAACTGATCCAGAACTCATA…
Chr01	GmHk_01G000259.4	2792635	2798771	-	GGAT2_3	Glutamate--glyoxylate aminotransferase 2	GO:0003824;GO:0009058;GO:0030170	IPR015421;IPR015422;IPR015424	PF00155	cd00609		aminotransferase	E	MPPKPLDYGSINENVKKSQYAVRGELYLRASELQKEGKKIIFTNVGNPHALGQKPLSFPRQVVALCQAPFLLDDPNVGLLFPADAIARAKHYLSLTSGGLGAYSDSRGLPGVRKEVAEFILRRDGYPTDPELIYLTDGASKGVMQILNTIIRGQDDGILVPVPQYPLYSATIALLGGTLVPYYLEETANWGLDVNELRQSVEQARFKGITVKAMVIINPGNPTGQCLSEANLREVLQFCYQENLALLGDEVYQTNIYQDERPFISSRKVLMDLGPPISKEVQLISFHSVSKGYYGECGQRGGYFEMTNIPPETVDEIYKVASISLSPNVPAQIFMGVMLHPPQPGDISYDKFVRESTGILESLRRRARLMTDGFNSCRNVVCNFTEGAMYSFPQIRLPP…	ATGCCACCAAAGCCTTTAGACTATGGGTCAATAAATGAAAACGTGAAGAAGAGTCAATATGCTGTCAGAGGTGAATTATACCTTCGAGCTTCTGAGCTTCAGAAAGAGGGCAAAAAGATTATATTTACTAATGTTGGCAACCCACATGCATTGGGACAGAAACCACTGAGCTTCCCTCGTCAGGTTGTTGCTTTGTGCCAAGCTCCATTCCTACTTGATGATCCTAATGTTGGACTGCTATTCCCTGCTGATGCAATTGCAAGAGCTAAACACTATCTTTCATTGACCTCGGGCGGTTTAGGCGCTTATAGTGACTCCCGCGGCCTTCCAGGAGTGAGGAAGGAAGTGGCTGAGTTCATACTCAGGCGTGATGGTTATCCAACTGATCCAGAACTCATA…
Chr01	GmHk_01G000260.1	2808669	2812381	+	PRS3_0	Ribose-phosphate pyrophosphokinase 3, mitochondrial	GO:0009116	IPR029057;IPR029099	PF00156;PF13793	cd06223		Phosphoribosyl pyrophosphate synthase	F	MAATPPLQSFSVLHSNKPSHSLLRPSSNKNRTFFSFTSNLRCEIKGFDFESHRGWTIERVSDMSKESTNSHTNPSSPLLSVSAVTSASQFPTKNAKKVVLFYCAETKALAEKIAAETDAIELRSISWGKFPDGFPNIFIPNAQGIRGMHVAFLASFSSPAVIFEQIPVIYALPKLFIASFTLVLPFFPTGTSERMEDEGDIATAFTLARLLSNIPISRGGPTSLVTFDIHALQERFYFGDNILPCFESGIPLLKRRLQDLPDSDNISVAFPDDGAWKRFHKQLQHFPTIVCAKVREGDQRIVRIKEGDPRGRHIVIVDDLVQSGGTLIECQKVLAAHGATKISAYVTHGIFPNKSWARFGHDNGGHPESAFTYFWITDSCPLTVKDVMNRPPFEILSLA…	ATGGCGGCCACGCCACCCCTTCAGTCTTTTTCGGTTCTTCATTCAAACAAACCCTCTCACTCTCTGCTTCGCCCCTCTTCTAACAAAAACAGAACCTTTTTCTCTTTCACTTCGAATCTGAGGTGTGAGATCAAAGGCTTTGACTTCGAGAGCCACCGTGGTTGGACCATCGAGCGCGTCTCCGACATGAGCAAAGAATCCACCAATTCTCACACCAACCCTTCTTCTCCGTTGCTCTCCGTCTCCGCTGTCACCTCCGCCTCCCAATTCCCCACCAAAAATGCCAAAAAAGTTGTCCTTTTCTACTGCGCCGAGACCAAGGCCCTCGCCGAGAAAATCGCTGCCGAAACTGATGCCATTGAACTTCGTAGCATCTCTTGGGGCAAGTTTCCTGATGGC…
Chr01	GmHk_01G000261.1	2826204	2827993	-	PER37_0	Peroxidase 37	GO:0004601;GO:0006979;GO:0020037;GO:0042744;GO:0055114	IPR002016;IPR010255;IPR019793;IPR033905	PF00141	cd00693		peroxidase	G	MKMTRIFLTTLSLWLLVLAPSKAEEGFPDKLPSTFHSLFPFLGRQDDLNKPQKGPNDESQQQNVPQQAADQNPQILSQDFYIKTCPNAQKIVADALAKIVKTNPGALGNLLRLQFHDCFVNGCDASILLDYSPSGDAVEKSSMVNGLLLKGADMIDEIKLKLEEQCPQTVSCADTLAFTANEVMTMAGLAPQKPLGGRRDALVSLATAAETDNIPMPNWTMEQMVKLFNKKGFNIEEMVILLGAHSIGMAHCDLFIERAYNFQNTGKPDPSLTVEVLEELRKACPNLNTPKYRNPPVNFDATPTVLDNLFYKDMVERKRTLLITDSHILEDPRTLPIVQQFAHDASLFPRRFPEVMLKMSSLNVLTGNEGEVRKICRSTN	ATGAAAATGACACGGATCTTCCTTACGACCCTTTCATTGTGGCTCTTGGTCCTCGCTCCTTCCAAGGCCGAGGAGGGATTTCCCGACAAACTTCCATCAACATTTCATTCTCTATTTCCGTTTCTCGGTCGTCAAGATGACCTGAACAAGCCACAAAAGGGTCCTAATGACGAGTCTCAACAACAGAACGTGCCTCAACAAGCGGCTGACCAAAATCCTCAGATACTCAGCCAAGATTTCTACATAAAGACTTGCCCTAATGCACAAAAAATCGTGGCCGATGCACTTGCCAAGATTGTTAAGACCAATCCGGGCGCACTCGGAAACTTACTCCGCCTTCAATTCCATGACTGCTTCGTTAATGGATGCGATGCATCCATCTTGCTAGATTACTCGCCA…
Chr01	GmHk_01G000262.1	2831226	2835663	+	LYK3_0	LysM domain receptor-like kinase 3	GO:0004672;GO:0005524;GO:0006468	IPR008271;IPR011009;IPR017441;IPR018392;IPR036779	PF00069;PF01476			LysM domain	T	MASSLVALLSLLLTLLATSCLSATVFSLQVSIKTTYLEPFKCSPKITTCNASLYHISYGNNIDDIATFYSVSTSQIKPIMRTTEQDYLITVPCSCNDTNGLGGYFYDTTYKVKSNDTFVNINNFVYSGQAWPINGELDQNEELTIHLPCGCSEKSDSQIVVTYTVQRNDTPVSIAALLNATLDDMVSMNEVLAQNPSFIDVTWVLYVPRELNGLPLSKGKDKKQKLEIIIGILAGVTLLSIITLIILSVVLRRSRANKTAKNDPSVVSKRSITNRTISIKNRDFHTEYIEDATTFESERPVIYALEEIEDATNNFDETRRIGVGGYGTVYFGMLEEKEVAVKKMRSNKSKEFYAELKALCRIHHINIVELLGYASGDDHLYLVYEFVPNGSLCEHLHDP…	ATGGCTTCTTCTCTAGTGGCACTTCTTTCTCTTCTCCTCACTCTTCTTGCAACTTCATGTCTAAGTGCAACTGTGTTTTCCCTCCAAGTTTCAATCAAAACAACTTACTTGGAACCTTTCAAATGCTCCCCTAAGATCACCACATGCAATGCCTCACTCTACCACATAAGCTACGGCAACAACATAGACGACATAGCAACCTTTTACTCCGTTAGTACCTCCCAAATCAAACCGATAATGCGCACTACCGAGCAAGATTACCTCATAACAGTGCCTTGCTCTTGCAATGACACCAATGGACTTGGCGGATATTTCTATGATACAACCTACAAGGTGAAGTCCAATGACACGTTTGTGAATATTAACAACTTTGTTTACAGTGGTCAAGCCTGGCCTATT…
Chr01	GmHk_01G000263.1	2841839	2846090	+	AP1M2_0	AP-1 complex subunit mu-2	GO:0006886;GO:0016192;GO:0030131	IPR011012;IPR018240;IPR022775;IPR028565;IPR036168	PF00928;PF01217	cd09250		Adaptor-related protein complex	U	MAGAASALFLLDIKGRVLIWRDYRGDVSALDAERFFTKLIEKQADPQAQDPVVHDNGVTYMFIQHSNVYLMIATRQNCNAASLLFFLHRIVDVFKHYFEELEEESLRDNFVVVYELLDEIMDFGYPQYTEAQILSEFIKTDAYRMEVTQRPPMAVTNAVSWRSEGINYKKNEVFLDVVESVNILVNSNGQIIRSDVVGALKMRTYLSGMPECKLGLNDRVLLEAQGRTTKGKAIDLEDIKFHQCVRLARFENDRTISFIPPDGSFDLMTYRLSTQVKPLIWVEASVEKHSKSRIEIMVKARSQFKERSTATNVEIELPVPVDATNPNVRTSMGSASYAPEKDALIWKIRSFPGGKEYMLRAEFRLPSITDEEATPERKAPIRVKFEIPYFTVSGIQVRY…	ATGGCAGGGGCAGCCTCTGCTCTGTTCCTCCTCGACATCAAAGGCCGCGTCCTCATCTGGCGCGACTACCGCGGCGATGTCTCCGCCCTCGACGCCGAACGCTTCTTCACCAAACTCATCGAAAAACAGGCCGATCCGCAAGCTCAAGATCCGGTTGTGCACGACAACGGCGTGACCTACATGTTCATCCAACACAGCAACGTGTACCTCATGATAGCCACCAGACAGAACTGCAATGCCGCCAGCCTCCTCTTCTTCCTGCACCGAATCGTCGATGTGTTCAAGCACTACTTTGAAGAATTGGAAGAGGAATCGCTCAGGGACAACTTCGTCGTCGTGTATGAGCTACTTGATGAGATTATGGACTTTGGCTACCCTCAGTACACTGAGGCGCAGATT…
Chr01	GmHk_01G000264.1	2848906	2852569	-	TAA1_0	L-tryptophan--pyruvate aminotransferase 1	GO:0003824;GO:0016846	IPR015421;IPR015422;IPR015424	PF04864	cd00609		tryptophan aminotransferase	E	MVVATNSFPSSSVTIPPTNISPNAILPLERGDPIVFGEYWKKMSETCTVVIKGWELMSYLSDMNNVCWYMLPETKEAIKRLHHVVGNAVTEDRYIVVGNGATQLLQGAVFALTPSEASKPINVVVAAPYYSEYQDEVDILRSGLYQWAGDAALYEKNEPYIEVVTSPNNPDGTMRGPVVKSEAEGKLIHDLAYYWPHYTPITHQADHDIMIFTFSKCTGHAGSRIGWAIVKDIEVAKKMTRYVQMSSIGVSKESQTRVAKIMGVICDGYQNFESMESELFFEYSKRILKKRWEKLWEVIDESKVFSVAKYPKAFCNFTNESSESFPGFIWLKCEEGIEDCGSYLLEKLKIRARGGERFGVSPKYARISMIGTDDEFHEFLNRVSNAKKECD	ATGGTGGTGGCAACAAACAGCTTCCCTTCTTCCAGTGTCACAATTCCCCCAACAAATATCTCACCTAATGCCATCCTACCTCTTGAGAGGGGTGATCCAATAGTGTTTGGTGAATACTGGAAAAAGATGAGTGAGACTTGCACCGTAGTTATCAAAGGGTGGGAGCTTATGAGCTATCTGAGTGACATGAACAACGTGTGCTGGTACATGTTACCAGAGACGAAGGAAGCCATTAAAAGGCTCCACCACGTGGTGGGAAATGCTGTTACCGAAGACAGATACATTGTGGTGGGGAATGGAGCCACACAACTCCTCCAGGGTGCTGTTTTTGCTCTCACTCCTTCAGAGGCTTCTAAACCCATCAACGTTGTGGTTGCTGCTCCATACTACTCGGAATAC…
Chr01	GmHk_01G000265.1	2862234	2867217	-	lip_2	Lipase		IPR029058				Triacylglycerol Lipase	S	MMRLWISYLQLVELFVSSLVHMLYGFYIFSSAVAGDLSQALNEYFHKVNNVNVEVREEISKPNQANDLPPIVLVHGIFGFGKGRLGALSYFAGAEKKDERVLVPDLGSLTSIYDRARELFYYLKGGQVDYGEEHSKACGHSQFGRIYEQGHYPEWDEDHPIHFVGHSAGAQVIRVLQQMLADKAFKGYENTSENWVLSVTSLSGAFNGTTRTYADGMLPEDGRTLKPICLLQLCRIGVIIYDWFDISWLKNYYNFGFDHYNMSWRKMGIWGLVDCLLGNAGPFASGDWILPDLTIQGSIRLNYHIRTFPNTYYFSYATKRTTKIMGVKVPSSILGIHPLLFIRVLQMCQWRFPPDVPPPYKGYRDEDWQDNDGALNTISMTHPRLPIEHPNCLVEKESD…	ATGATGAGGCTATGGATTTCTTATCTGCAATTGGTGGAACTTTTTGTGAGTTCATTGGTTCATATGCTTTATGGGTTTTACATATTTAGCTCCGCTGTGGCTGGGGATCTCTCACAGGCTCTCAATGAATATTTTCACAAGGTTAATAATGTGAATGTTGAGGTCAGAGAGGAAATTTCCAAGCCCAATCAGGCTAATGATCTTCCTCCTATTGTACTTGTTCATGGGATTTTTGGATTTGGCAAAGGGAGATTGGGGGCTTTATCATACTTTGCTGGGGCAGAGAAGAAGGATGAAAGGGTTCTTGTCCCTGATTTGGGGTCCTTAACCAGTATCTATGATAGGGCACGAGAATTGTTCTATTATTTAAAAGGTGGGCAAGTTGATTATGGTGAGGAG…
Chr01	GmHk_01G000265.2	2864428	2867217	-	lip_2	Lipase		IPR029058				Triacylglycerol Lipase	S	MMRLWISYLQLVELFVSSLVHMLYGFYIFSSAVAGDLSQALNEYFHKVNNVNVEVREEISKPNQANDLPPIVLVHGIFGFGKGRLGALSYFAGAEKKDERVLVPDLGSLTSIYDRARELFYYLKGGQVDYGEEHSKACGHSQFGRIYEQGHYPEWDEDHPIHFVGHSAGAQVIRVLQQMLADKAFKGYENTSENWVLSVTSLSGAFNGTTRTYADGMLPEDGRTLKPICLLQLCRIGVIIYDWFDISWLKNYYNFGFDHYNMSWRKMGIWGLVDCLLGNAGPFASGDWILPDLTIQGSIRLNYHIRTFPNTYYFSYATKRTTKIMGVKVPSSILGIHPLLFIRVLQMCQWRFPPDVPPPYKGYRDEDWQDNDGALNTISMTHPRLPIEHPNCLVEKESD…	ATGATGAGGCTATGGATTTCTTATCTGCAATTGGTGGAACTTTTTGTGAGTTCATTGGTTCATATGCTTTATGGGTTTTACATATTTAGCTCCGCTGTGGCTGGGGATCTCTCACAGGCTCTCAATGAATATTTTCACAAGGTTAATAATGTGAATGTTGAGGTCAGAGAGGAAATTTCCAAGCCCAATCAGGCTAATGATCTTCCTCCTATTGTACTTGTTCATGGGATTTTTGGATTTGGCAAAGGGAGATTGGGGGCTTTATCATACTTTGCTGGGGCAGAGAAGAAGGATGAAAGGGTTCTTGTCCCTGATTTGGGGTCCTTAACCAGTATCTATGATAGGGCACGAGAATTGTTCTATTATTTAAAAGGTGGGCAAGTTGATTATGGTGAGGAG…
Chr01	GmHk_01G000265.3	2864428	2867217	-	lip_2	Lipase		IPR029058				Triacylglycerol Lipase	S	MMRLWISYLQLVELFVSSLVHMLYGFYIFSSAVAGDLSQALNEYFHKVNNVNVEVREEISKPNQANDLPPIVLVHGIFGFGKGRLGALSYFAGAEKKDERVLVPDLGSLTSIYDRARELFYYLKGGQVDYGEEHSKACGHSQFGRIYEQGHYPEWDEDHPIHFVGHSAGAQVIRVLQQMLADKAFKGYENTSENWVLSVTSLSGAFNGTTRTYADGMLPEDGRTLKPICLLQLCRIGVIIYDWFDISWLKNYYNFGFDHYNMSWRKMGIWGLVDCLLGNAGPFASGDWILPDLTIQGSIRLNYHIRTFPNTYYFSYATKRTTKIMGVKVPSSILGIHPLLFIRVLQMCQWRFPPDVPPPYKGYRDEDWQDNDGALNTISMTHPRLPIEHPNCLVEKESD…	ATGATGAGGCTATGGATTTCTTATCTGCAATTGGTGGAACTTTTTGTGAGTTCATTGGTTCATATGCTTTATGGGTTTTACATATTTAGCTCCGCTGTGGCTGGGGATCTCTCACAGGCTCTCAATGAATATTTTCACAAGGTTAATAATGTGAATGTTGAGGTCAGAGAGGAAATTTCCAAGCCCAATCAGGCTAATGATCTTCCTCCTATTGTACTTGTTCATGGGATTTTTGGATTTGGCAAAGGGAGATTGGGGGCTTTATCATACTTTGCTGGGGCAGAGAAGAAGGATGAAAGGGTTCTTGTCCCTGATTTGGGGTCCTTAACCAGTATCTATGATAGGGCACGAGAATTGTTCTATTATTTAAAAGGTGGGCAAGTTGATTATGGTGAGGAG…
Chr01	GmHk_01G000266.1	2876337	2878016	-	OXR1_0	Oxidation resistance protein 1		IPR006571	PF07534			Oxidation resistance	S	MGLILHPSLRFSVLCCLLRIPGIRLVKLMRRMMVAGDDSATKESFVVKKSLFSRGKHSLGRAIHQVARMGGFRNKDGNYTDEGVEMKHIVKTPVAVAVARIGDHLPEISEPSMLVSEDVRNVVYASLPALIHGRKWLMLYSTWKHGISLSTLYRRSMFWPGLSLLVVGDRKGAVFGGLVEAPLRPSNKRKYQGTNNSFVFTNTSELYFYIYCQCFVHIQQFDVRIFFTMLRRMTH	ATGGGCCTGATACTTCATCCTTCACTGCGTTTCTCTGTTCTTTGTTGTCTACTTCGGATTCCGGGGATAAGGTTGGTGAAGCTGATGAGAAGAATGATGGTGGCAGGTGATGACTCTGCCACAAAGGAAAGTTTTGTTGTGAAGAAAAGTTTGTTTTCCAGGGGCAAGCACTCACTTGGTAGGGCCATTCACCAAGTTGCCAGAATGGGCGGATTTCGCAACAAGGATGGTAATTACACCGATGAAGGCGTTGAGATGAAGCACATTGTGAAAACGCCTGTGGCTGTGGCTGTGGCTCGGATTGGTGATCACCTGCCTGAAATTTCTGAGCCTTCAATGCTCGTTTCTGAGGATGTGAGGAATGTGGTGTATGCTTCACTGCCGGCACTTATTCACGGC…
Chr01	GmHk_01G000267.1	2879639	2882516	-	-	hypothetical protein		IPR027973	PF15375			NA	S	MSFSNSKQTQTLTFEFSHLARFSPFSAPVPPRLETVRPLHGATEQFRRTLSLQLQHAVVPEAVPSDSRPSLCIFVFQSSFSAATKILFRRDDYIFVSVLMGKMHKNRKQAGGHGTPREETDMQEQEMDIRKIMKDVENFSYSHMSWKERKKIENRNVVSLGGKPQKNQRLPLSVARPMMKKQKEREQKMLQERLILGQFGGKLGGSSKRSAGKHKPENRGLKSSEGHFRNGILNVKHLLNSAPSRDRETGTNMSNAWKGKGGKKKNSNKGGGKKHR	ATGTCATTTTCGAATTCGAAGCAAACACAAACCCTAACTTTCGAGTTCTCTCATCTCGCGCGGTTCTCTCCGTTCTCGGCGCCGGTGCCGCCGCGTCTCGAGACTGTTCGTCCATTGCACGGAGCCACGGAGCAATTCCGTCGCACTCTAAGCCTGCAGCTTCAACACGCCGTCGTACCTGAAGCAGTTCCGTCGGACTCACGCCCTAGTCTCTGCATCTTTGTTTTTCAGAGTAGTTTCTCTGCTGCAACAAAGATCCTATTCAGAAGGGATGATTATATTTTTGTCAGTGTATTGATGGGAAAGATGCACAAGAATAGGAAACAAGCTGGTGGGCATGGAACTCCAAGAGAAGAAACCGATATGCAGGAACAAGAAATGGACATAAGGAAGATTATG…
Chr01	GmHk_01G000267.2	2879639	2882516	-	-	hypothetical protein		IPR027973	PF15375			NA	S	MSFSNSKQTQTLTFEFSHLARFSPFSAPVPPRLETVRPLHGATEQFRRTLSLQLQHAVVPEAVPSDSRPSLCIFVFQSSFSAATKILFRRDDYIFVSVLMGKMHKNRKQAGGHGTPREETDMQEQEMDIRKIMKDVENFSYSHMSWKERKKIENRNVVSLGGKPQKNQRLPLSVARPMMKKQKEREQKMLQERLILGQFGGKLGGSSKRSAGKHKPENRGLKSSEGHFRNGILNVKHLLNSAPSRDRETGTNMSNAWKGKGGKKKNSNKGGGKKHR	ATGTCATTTTCGAATTCGAAGCAAACACAAACCCTAACTTTCGAGTTCTCTCATCTCGCGCGGTTCTCTCCGTTCTCGGCGCCGGTGCCGCCGCGTCTCGAGACTGTTCGTCCATTGCACGGAGCCACGGAGCAATTCCGTCGCACTCTAAGCCTGCAGCTTCAACACGCCGTCGTACCTGAAGCAGTTCCGTCGGACTCACGCCCTAGTCTCTGCATCTTTGTTTTTCAGAGTAGTTTCTCTGCTGCAACAAAGATCCTATTCAGAAGGGATGATTATATTTTTGTCAGTGTATTGATGGGAAAGATGCACAAGAATAGGAAACAAGCTGGTGGGCATGGAACTCCAAGAGAAGAAACCGATATGCAGGAACAAGAAATGGACATAAGGAAGATTATG…
Chr01	GmHk_01G000268.1	2886138	2890451	-	-	hypothetical protein		IPR004314;IPR025521	PF03080;PF14365			carboxyl-terminal peptidase	S	MCWIDLVESKPRNTHFCFVHGRRKRRRRRQGQCEQSHTDLSIETKRQNLSSMDFSLCLSSPIISTLVHFLLVASLFCPVCSSDIGNIGNTPVANQTFKPQEEAHKMNIIRTRLQQINKPAVKTIQSPDGDVIDCVVSHQQPAFDHPMLKGHKPLDPPERPKGHNQMDMSENFQLWTMSGESCPEGTIPIRRTTEQDMLRASSVSRFGRKIRRRVRRDTNSNGHEHAVGYVSGEQYYGAKASINVWAPRVANQDEFSLSQMWVISGSFGDDLNTIESGQPRALRGQIPEILYSDAYQATGCYNLLCSGFVQTNNRIAIGAAISPTSSYAGGQFDISLLIWKDPKHGNWWLEFGSGILVGYWPSFLFTHLRDHASMVQFGGEIVNSRQSGSHTSTQMGSGH…	ATGTGTTGGATAGATTTGGTGGAATCAAAGCCTAGGAACACACACTTTTGTTTTGTGCATGGAAGAAGAAAAAGAAGAAGAAGAAGACAAGGCCAATGTGAACAAAGTCACACGGATTTGTCAATAGAAACAAAGAGGCAAAATCTCTCAAGCATGGATTTTAGCTTGTGTTTGAGCTCCCCAATCATTTCCACACTTGTACATTTTCTCCTTGTTGCTTCTTTGTTTTGTCCTGTTTGTTCCTCAGATATTGGCAATATTGGCAACACCCCAGTTGCCAATCAGACTTTCAAGCCGCAAGAAGAGGCTCACAAGATGAACATCATAAGAACTCGTCTTCAACAGATCAACAAGCCCGCCGTTAAGACAATTCAGAGTCCTGATGGTGATGTAATAGAC…
Chr01	GmHk_01G000269.1	2902703	2905622	-	At1g48100_0	Polygalacturonase At1g48100	GO:0004650;GO:0005975	IPR006626;IPR011050;IPR012334	PF00295			Glycoside hydrolase family 28	M	MKRNRSFSLLFFLSLLVIIFVTFSIVSVEARKTNIKKKLHKRHKGGHTQGSHSPCPVPTPQGSTFDVLSFGAKGNGVSDDSEAFLAAWNGACKVAGATVKIPAQLKFLIKPVTLQGPCISDLTLQIDGTLLAPPEASTWPKSSLFQWINFKWVRNFTIKGSGTVDGQGYNWWSSSEFYDIQKSYSKHIPGMKPTAIRFYSSNFVTVRDIRIINSPLCHLKFDNSKGIKVNNITISSPENSPNTDGIHLQNTQDVEIQRSIISTGDDCVSIQTGCSNIHVHHINCGPGHGISLGGLGKDKSAACVSDITVEDISMKNTLYGARIKTWQGGIGMVKNVTFSRIQVYDVMYPIMIDQYYCDKQICKNHTSTVVISGVKFDQIHGTYGMQPVHLACSNSIPCT…	ATGAAGAGGAACAGAAGTTTTTCCTTACTCTTTTTCCTGTCCTTGTTGGTGATTATCTTTGTCACCTTCTCTATAGTTTCTGTGGAAGCAAGGAAGACAAACATCAAGAAAAAACTTCACAAACGTCACAAAGGTGGTCACACTCAAGGGTCACATTCTCCATGCCCAGTGCCAACCCCTCAAGGGAGCACCTTTGACGTTTTGTCTTTTGGCGCCAAGGGAAATGGAGTTTCTGATGATTCAGAGGCATTTCTAGCTGCATGGAATGGTGCATGTAAAGTTGCTGGTGCTACAGTTAAAATTCCAGCACAACTCAAGTTCCTCATCAAACCTGTTACTTTACAAGGCCCTTGTATATCTGACCTTACTCTTCAGATAGATGGAACTCTGTTGGCACCT…
Chr01	GmHk_01G000270.1	2914012	2916934	+	CRK3_0	Cysteine-rich receptor-like protein kinase 3	GO:0004672;GO:0005524;GO:0006468	IPR001245;IPR002902;IPR011009;IPR017441;IPR038408	PF01657;PF07714			Serine Threonine protein kinase	T	MSLASFFLIFLCYHALPALADPSATEVAVLSTNTTAPIPQRQAFLTNFYDALEALTALVTRQKYALIVKGTTQNNATVYAFGECAKDLTKPDCDVCFAQYKTRVLRCSQFQRGINGGIPQDLTVCGTEDFCGNWSVYKANTVELVRNLSIEAPKNEGFFVGYVSQRNKFVNGSACQNCLDEAVTRINSCAPKVEGKALNVGCYLRYSIHNFYNSSNNNAPQENHASASLASADCCNYDFLCEDKITEAEESDSNKLGEGGSGSVYKGALPDGTTMAIKRLSFNTSQWAYHFFNEVNLISGIHHKNLVKLLGCSITGPESLLVYEFVPNHSLYDHLSEDKSHLSTAICGTLGYMAPEYVVLGKLTEKADVYSFGVLIMEIISGKKSKSFLRDFSFLLLYK…	ATGTCCCTTGCATCGTTTTTTCTTATCTTCCTTTGTTACCATGCACTTCCTGCTCTTGCTGATCCAAGTGCCACGGAGGTAGCAGTGTTGAGCACCAACACAACAGCCCCAATACCTCAGCGACAAGCTTTCTTAACAAACTTCTATGATGCCTTGGAAGCCTTAACCGCTTTGGTTACAAGGCAAAAGTATGCTCTTATTGTTAAAGGGACTACTCAAAATAATGCCACTGTCTATGCTTTTGGTGAGTGCGCGAAAGATCTTACAAAACCAGATTGTGATGTGTGCTTTGCACAGTACAAGACACGTGTCCTTAGGTGCTCTCAATTTCAGAGAGGCATTAACGGTGGCATCCCTCAGGACTTGACTGTTTGTGGAACCGAAGATTTTTGTGGGAAT…
Chr01	GmHk_01G000271.1	2921203	2924227	+	CRK2_0	Cysteine-rich receptor-like protein kinase 2	GO:0004672;GO:0005524;GO:0006468	IPR001245;IPR002902;IPR008271;IPR011009;IPR017441;IPR038408	PF01657;PF07714	cd14066		Serine Threonine protein kinase	T	MKKLVSLISFQCNFFLLIKLLLLSKTIIAEPRAKTVLITCGHELEHNTTIFVPNFVATMEKISDEMRKTGFGTAIVGTGPDTNYGLAQCYGDLSLLDCVLCYAEARTVLPQCFPYNSGRIFLDGCFMRAENYSFFNEYTGPGDRAVCGNTTRKNSSFHAAAMQAVLRAVQDAPNNKGYAKGNVAVAGTTNQSAYVLADCWRTLDKSSCKACLENASSSILGCLPWQEGRALNTGCFMRYSDTDFLNKEQENGSSRGNVVVIVIAVVSSVTVLVVGVTIGVYIWKQRYIQKKRRGSNDAKKLAKTLQNNNLNFKYSTLDKATESFHENNKLGQGGFGTVYKGVLADGREIAVKRLFFNNRHRAADFYNEVNIISSVEHKNLVRLLGCSCSGPESLLVYEF…	ATGAAGAAACTAGTCTCTCTCATCTCTTTTCAATGCAACTTTTTCCTTCTCATCAAGTTACTACTACTATCGAAGACTATAATAGCAGAACCAAGGGCCAAGACAGTCCTAATAACATGTGGCCATGAACTAGAGCACAACACTACTATCTTTGTTCCAAATTTTGTTGCAACTATGGAGAAGATCAGTGATGAGATGCGCAAAACTGGCTTTGGCACCGCAATTGTAGGGACTGGACCCGATACTAACTATGGCCTTGCCCAGTGTTATGGAGATCTTTCATTACTTGACTGTGTATTATGCTATGCTGAGGCACGCACGGTTCTTCCTCAGTGCTTCCCTTATAATTCTGGTCGCATTTTCCTTGACGGTTGCTTCATGAGAGCTGAGAATTATAGT…
Chr01	GmHk_01G000272.1	2925270	2928497	-	MENG_0	2-phytyl-1,4-beta-naphthoquinone methyltransferase, chloroplastic	GO:0008168;GO:0042372;GO:0052624	IPR023576;IPR029063;IPR032904	PF01209	cd02440	TIGR01934	Methyltransferase required for the conversion of demethylmenaquinone (DMKH2) to menaquinone (MKH2)	H	MAMTFVPSSTSSTFRPTLIRCASANERQALFSRIAPVYDNLNDLLSLGQHRIWKRMAVSWTGAKMGDCVLDVCCGSGDLSFLLSDKVGSHGKVIGLDFSKDQLSFALSRQQSLSKNCFMNIEWVEGDALDLPFSDGWFDAITMGYGLRNVVDKQKAMQEIFRVLKTGSTVSILDFNKSNELLTSAVTEWMIDNIVVPVATGYGLSEEYRYLKRSIREFLTGKELEKLALGVGFSAARHYEIGGGLMGCLVAKR	ATGGCGATGACGTTTGTTCCTTCTTCAACTTCTTCCACTTTCCGACCAACGTTGATTCGCTGCGCCAGCGCCAATGAGCGGCAGGCGCTGTTTAGCCGCATTGCTCCTGTCTATGATAACCTGAATGATTTGCTGAGCCTTGGGCAACACCGGATTTGGAAGAGAATGGCAGTGTCCTGGACTGGAGCGAAAATGGGAGACTGTGTGTTGGATGTTTGCTGTGGAAGTGGGGACTTATCCTTTCTCTTGTCCGACAAAGTTGGCTCTCATGGCAAGGTGATTGGTCTTGATTTCTCGAAGGATCAGCTATCCTTTGCCTTATCTCGGCAGCAATCACTTTCAAAGAATTGCTTCATGAATATCGAGTGGGTTGAAGGTGATGCTCTTGACTTGCCATTT…
Chr01	GmHk_01G000273.1	2938957	2947339	-	KNAT6_0	Homeobox protein knotted-1-like 6	GO:0003677;GO:0005634;GO:0006355;GO:0043565	IPR005539;IPR005540;IPR005541;IPR008422;IPR009057;IPR017970	PF03789;PF03790;PF03791;PF05920	cd00086		homeobox	K	MDGMYGVPPEYADKALMTPENLIFPPDYHHAFLSAGRIPLFGSDELFSSADGIHRQQDEDDVATTTVMKAKIASHPQYSRLLQAYIDCQKVGAPPEIARLLEEIRRENDLCKSDVVSSSTCFGADPELDEFMETYCDMLVKYKSDLARPFEEATTFLNKIEMQLSHLCTGASVSNVSDDGGVSSDEDLSTGDGDAQDGQLKGEDRELKDRLLRKFGSHIGTLKLEFSKKKKKGKLPKEARQTLLQWWNVHYKWPYPTEADKIELAKSTGLDQKQINNWFINQRKRHWKPSENMQFSMMENLNGRFLADE	ATGGATGGAATGTACGGAGTGCCGCCGGAGTACGCCGACAAGGCCCTCATGACGCCGGAGAATCTGATTTTCCCGCCGGACTACCACCACGCCTTCCTCTCCGCCGGCCGGATTCCGCTGTTCGGATCCGACGAGCTCTTCTCTTCCGCCGACGGAATTCACAGGCAGCAGGACGAAGATGACGTGGCAACCACCACCGTCATGAAGGCCAAAATCGCCTCTCATCCTCAGTACTCTCGCCTCCTCCAAGCTTACATCGACTGCCAGAAGGTTGGGGCGCCTCCGGAAATAGCGCGTTTGTTGGAGGAAATCCGGCGAGAAAACGACCTATGCAAGAGCGACGTCGTTTCTTCTTCCACGTGCTTTGGAGCCGATCCCGAGCTTGACGAGTTCATGGAA…
Chr01	GmHk_01G000274.1	2965030	2965470	+	-	hypothetical protein							R	MGEFVDGRWEWKLSWRRDFFDYEIQMAADFVDEIHSGHIHVICNSTMTRRLWWEPLRWVNRVGPFSTDPKNHFLQFTQWNNKASINNRWKFVWLALSFFVWHHRNAMIFKNHPFDPEKVIDDTLFHTWSLLKCAEKDYTRDYTIHM	ATGGGAGAATTTGTGGACGGCAGATGGGAATGGAAGTTATCTTGGAGAAGGGACTTTTTTGACTATGAAATACAAATGGCAGCTGACTTTGTAGATGAGATTCATTCTGGTCACATACATGTTATTTGCAACTCTACAATGACAAGGAGACTTTGGTGGGAGCCTTTGAGATGGGTTAATAGAGTGGGTCCTTTTTCCACAGACCCAAAGAACCACTTTTTGCAATTCACTCAATGGAACAACAAAGCTAGTATAAACAACAGATGGAAATTTGTGTGGTTAGCTCTATCCTTCTTCGTCTGGCATCATAGAAATGCTATGATTTTCAAGAACCACCCGTTTGATCCTGAAAAGGTTATCGATGATACCTTGTTCCACACTTGGTCTTTGTTAAAATGT…
Chr01	GmHk_01G000275.1	2992724	2997008	-	TBL2_1	Protein trichome birefringence-like 2		IPR025846;IPR026057	PF13839;PF14416			Pfam:DUF231	S	MDSSKRLTFSEPFMSQGRKVISGFSLGVGVSLLFLTLILLNSTSLSVPKVQVFLQGSDSNSTSSFSWRFPFTTALSSNGSVSSLHRVDVRVSSSEGSEKTLLGNLTGDQKNASLYDGHEEDEHCCSLKNVTLAGKENAHVGNSSCNGDGVGKCEDGLLFKESNNDSVSVGGLLGECDIFDGKWVRDEFKPYYPLGSCPNVDRDFDCHLNGRPDSDYVKWKWQPNGCDIPSLNATDFLEKLRGQKLVFVGDSLNRNMWESMVCILRQSVKDKKRVFEISGKTEFKKKGVYAFRFEASFWYIHEIFLSIYLDYNCSVDFVSSPFIVQESTFKGINGSFETLRLDLMDQTSTTYHDADIIVFNTGHWWTHEKTSRGEDYYQVGNHVYPRLKVLDAYTRALTT…	ATGGACTCTTCTAAGAGACTTACATTTTCGGAACCCTTTATGTCACAGGGGAGAAAGGTGATTTCTGGGTTCAGTTTGGGCGTTGGAGTTTCTCTCCTTTTCCTCACTCTTATCTTGCTCAACAGCACTTCCCTCTCCGTTCCCAAGGTTCAAGTGTTTCTCCAAGGATCCGATTCCAATTCCACTTCTTCGTTCTCGTGGCGTTTTCCCTTCACAACCGCTCTTTCTTCCAACGGTTCCGTGAGTTCTCTGCATAGGGTTGACGTGAGGGTGTCGTCAAGTGAGGGTTCGGAGAAAACCCTTTTGGGAAATCTCACTGGGGATCAGAAAAACGCAAGCTTGTATGATGGGCATGAGGAAGATGAACATTGTTGTTCTTTGAAGAATGTTACTTTGGCA…
Chr01	GmHk_01G000275.2	2992724	2997008	-	TBL2_1	Protein trichome birefringence-like 2		IPR025846;IPR026057	PF13839;PF14416			Pfam:DUF231	S	MDSSKRLTFSEPFMSQGRKVISGFSLGVGVSLLFLTLILLNSTSLSVPKVQVFLQGSDSNSTSSFSWRFPFTTALSSNGSVSSLHRVDVRVSSSEGSEKTLLGNLTGDQKNASLYDGHEEDEHCCSLKNVTLAGKENAHVGNSSCNGDGVGKCEDGLLFKESNNDSVSVGGLLGECDIFDGKWVRDEFKPYYPLGSCPNVDRDFDCHLNGRPDSDYVKWKWQPNGCDIPSLNATDFLEKLRGQKLVFVGDSLNRNMWESMVCILRQSVKDKKRVFEISGKTEFKKKVDFVSSPFIVQESTFKGINGSFETLRLDLMDQTSTTYHDADIIVFNTGHWWTHEKTSRGEDYYQVGNHVYPRLKVLDAYTRALTTWARWVDKNIDANRTQVFFRGYSVTHFRG…	ATGGACTCTTCTAAGAGACTTACATTTTCGGAACCCTTTATGTCACAGGGGAGAAAGGTGATTTCTGGGTTCAGTTTGGGCGTTGGAGTTTCTCTCCTTTTCCTCACTCTTATCTTGCTCAACAGCACTTCCCTCTCCGTTCCCAAGGTTCAAGTGTTTCTCCAAGGATCCGATTCCAATTCCACTTCTTCGTTCTCGTGGCGTTTTCCCTTCACAACCGCTCTTTCTTCCAACGGTTCCGTGAGTTCTCTGCATAGGGTTGACGTGAGGGTGTCGTCAAGTGAGGGTTCGGAGAAAACCCTTTTGGGAAATCTCACTGGGGATCAGAAAAACGCAAGCTTGTATGATGGGCATGAGGAAGATGAACATTGTTGTTCTTTGAAGAATGTTACTTTGGCA…
Chr01	GmHk_01G000276.1	3000880	3001441	+	-	hypothetical protein						-	-	MCPPPKKIRTKSAPKFVKSTKCAPSMSEQVDEMNTLVVWLAKMSITKNGQKISYMNEFLDPLQQFIVKIIDSFGTQDRLVKLLYFLYVQPGLIASVDKRIITYNMDDAIISQYNVFLVPLSMLQNWTFLRLGVRHHL	ATGTGTCCCCCTCCAAAAAAAATAAGAACAAAGAGTGCACCGAAGTTTGTGAAATCTACTAAATGTGCACCTTCAATGTCGGAGCAAGTTGATGAAATGAACACATTGGTTGTGTGGCTCGCAAAGATGTCAATAACAAAAAATGGACAAAAAATCTCTTATATGAATGAATTTCTCGATCCGTTGCAACAATTCATTGTAAAAATTATTGACTCGTTTGGCACACAGGACAGATTGGTTAAATTGTTATATTTTTTGTATGTCCAACCCGGCCTAATAGCATCTGTTGACAAGAGGATAATCACTTATAACATGGATGATGCCATTATTAGTCAATATAATGTTTTCTTGGTCCCCTTATCTATGCTCCAAAATTGGACTTTTCTTCGCTTGGGAGTT…
Chr01	GmHk_01G000277.1	3004554	3009657	-	NIK3_0	Protein NSP-INTERACTING KINASE 3	GO:0004672;GO:0005515;GO:0005524;GO:0006468	IPR001611;IPR008271;IPR011009;IPR013210;IPR017441;IPR032675	PF00069;PF08263;PF13855			NSP-interacting kinase	T	MEHSSLVFWLLGFLLLLLMEISSAALSPSGINYEVVALMAIKNGLIDPHNVLENWDINSVDPCSWRMITCSPDGSVSVLGLPSQNLSGTLSPGIGNLTNLQSVLLQNNAISGRIPAAIGSLEKLQTLDISNNAFSGEIPSSLGGLKNLNYLRLNNNSLTGSCPQSLSNIEGLTLVDLSYNNLSGSLPRISARTLKIVGNPLICGPKANNCSTVLPEPLSFPPDALRGQSDSGKKSHHVALAFGASFGAAFVLVIIVGFLVWWRYRRNQQIFFDVNEHYDPEVRLGHLKRFSFKELRAATDHFNSKNILGRGGFGIVYKACLNDGSVVAVKRLKDYNAAGGEIQFQTEVETISLAVHRNLLRLSGFCSTQHERLLVYPYMSNGSVASRLKDHIHGRPALD…	ATGGAGCATAGTAGTTTGGTTTTCTGGCTATTGGGGTTTCTGCTTCTGCTGTTGATGGAAATTTCTTCTGCTGCGCTTTCTCCTTCTGGCATAAACTATGAAGTTGTAGCTCTGATGGCCATAAAGAATGGCTTGATTGATCCTCACAATGTTCTGGAAAATTGGGATATTAATTCTGTTGATCCATGTAGCTGGAGGATGATTACTTGTTCCCCTGATGGTTCTGTTTCAGTATTGGGATTGCCTAGTCAGAACTTGTCTGGTACACTATCTCCTGGGATCGGAAACCTTACTAACTTACAATCTGTCTTGCTTCAGAATAATGCTATTTCTGGTAGAATTCCTGCTGCAATAGGAAGCTTGGAAAAGCTTCAGACACTCGATATTTCCAATAATGCA…
Chr01	GmHk_01G000278.1	3027462	3028577	-	At1g23390_0	F-box/kelch-repeat protein At1g23390	GO:0005515	IPR015915;IPR036047	PF00646			F-box Kelch-repeat protein	S	MSSTGEAPIHGDILEAIFSHVPLIHLVPASHVSNSWKRAVSSSLAHVRPIKPWLIVLTQSLRHSHVTTLHAYDPRSHVWLQIKNTARSHASPVRSSHSTLFYALTPSEFSFSLDALHLKWHYAPSPRVWRTNPVVARVGSRVVVAGGACEFEDDPLAVEMYDVNSQAWEACPSMPALLKSSTASSWLSVAVAGEIMHVTEKHSGVTYSFETISKTWKGPFSLRPHESVFHCVTGTLGERLMVAGLIGKVGNVKGVKLWEVRVRGGLGSGMEEVGEMPKEMVRKLFSGSELGSVEVTWIGDFVYVRNTSEPEELVLCEVLNHLNGVGCEWRSVRNAAVRCGARMVFCGGSVCMEDLQRAVMSENPTFSMKHV	ATGTCATCAACAGGAGAAGCACCCATCCATGGGGACATCTTAGAGGCCATATTCTCGCACGTGCCACTCATCCACCTTGTGCCCGCCTCTCACGTGTCAAATTCCTGGAAGCGTGCGGTCTCCTCCTCCCTCGCTCACGTCAGACCCATCAAGCCATGGCTCATAGTCCTCACCCAGAGCCTCCGCCACTCGCACGTGACAACTCTCCACGCCTACGACCCCCGCTCGCACGTGTGGCTCCAAATAAAAAACACCGCACGTTCCCACGCTTCCCCCGTGCGATCCTCCCACTCGACGCTGTTCTACGCGCTCACCCCATCCGAGTTCAGCTTCTCCCTCGACGCGCTGCACCTGAAATGGCACTACGCGCCCTCCCCGCGCGTGTGGCGCACCAATCCC…
Chr01	GmHk_01G000279.1	3036404	3036805	-	-	hypothetical protein	GO:0003676;GO:0004523		PF13456				R	MIIWSIWHDKNEKIWSDTEVHPQQSISRALQFLHKWKHARKSQLHSTPHTPQHAPNMKKPQIGFWKCNVDAAIFTSSNKFGVALCLSDHHGQFIQAKCICTDGTLEPKEVEAWGLLHALSKTGKLRKENIIIA	ATGATCATTTGGAGCATTTGGCATGATAAAAATGAAAAGATTTGGTCTGATACTGAAGTTCATCCTCAACAATCTATCTCACGTGCACTTCAGTTTTTACACAAGTGGAAGCATGCTCGAAAATCTCAGTTACATTCTACTCCACACACACCCCAACATGCTCCCAACATGAAGAAACCGCAAATTGGATTTTGGAAATGTAATGTTGACGCTGCAATCTTCACCTCAAGCAACAAATTTGGTGTTGCCCTATGCTTGAGTGATCACCATGGTCAATTCATCCAAGCAAAATGCATATGTACTGATGGCACACTAGAACCGAAAGAGGTAGAGGCTTGGGGCCTTCTTCATGCACTATCCAAGACAGGGAAATTGAGAAAGGAGAATATTATCATAGCT…
Chr01	GmHk_01G000280.1	3050448	3053876	-	ACLA-1_1	ATP-citrate synthase alpha chain protein 1	GO:0005524	IPR013815;IPR016102;IPR032263	PF08442;PF16114			Succinyl-CoA synthetase subunit beta	C	MARKKIREYDSKRLLKEHFKRLSGKELPIKSAQITASTDFTELQEKEPWLSSSKLVVKPDMLFGKRGKSGLVALNLDFAQVVSFVKERLGKEVEMSGCKGPITTFIVEPFIPHNEEFYLNIVSERLGNSISFSECGGIEIEDNWDKVKTAFVPTGVSLTSEIVAPLVATLPLEIKGEIEEFLKVVFTLFQDLDFTFLEMNPFTLVDGKPYPLDMRGELDDTAAFKNFKKWGDIEFPLPFGRVMSATESFIHGLDEKTSASLKFTVLNPKGRIWTMVAGGGASVIYADTVGDLGFASELGNYAEYSGAPKEEEVLQYARVVIDCATANPDDQKRALVIGGGIANFTDVAATFSGIIRALKEKESKLKAARMHIFVRRGGPNYQKGLALMRALGEDIGIPI…	ATGGCGCGTAAGAAGATCAGAGAGTATGACTCAAAGAGGTTGTTGAAGGAGCACTTTAAGAGACTTTCTGGCAAGGAGTTGCCGATCAAGTCTGCACAAATTACTGCATCAACTGATTTCACTGAGCTACAAGAGAAGGAACCCTGGCTTTCATCTTCTAAATTGGTTGTGAAACCTGACATGTTATTTGGAAAGCGTGGCAAAAGTGGTTTGGTTGCCTTAAATTTGGATTTTGCACAAGTTGTTTCGTTTGTGAAGGAGCGTCTTGGAAAAGAGGTTGAGATGAGTGGATGCAAAGGACCCATAACAACTTTCATTGTCGAACCTTTCATCCCACACAATGAAGAGTTTTACCTTAACATTGTCTCCGAGAGACTTGGGAACAGCATAAGCTTTTCA…
Chr01	GmHk_01G000280.2	3050448	3053876	-	ACLA-1_1	ATP-citrate synthase alpha chain protein 1	GO:0005524	IPR013815;IPR016102;IPR032263	PF08442;PF16114			Succinyl-CoA synthetase subunit beta	C	MARKKIREYDSKRLLKEHFKRLSGKELPIKSAQITASTDFTELQEKEPWLSSSKLVVKPDMLFGKRGKSGLVALNLDFAQVVSFVKERLGKEVEMSGCKGPITTFIVEPFIPHNEEFYLNIVSERLGNSISFSECGGIEIEDNWDKVKTAFVPTGVSLTSEIVAPLVATLPLEIKGEIEEFLKVVFTLFQDLDFTFLEMNPFTLVDGKPYPLDMRGELDDTAAFKNFKKWGDIEFPLPFGRVMSATESFIHGLDEKTSASLKFTVLNPKGRIWTMVAGGGASVIYADTVGDLGFASELGNYAEYSGAPKEEEVLQYARVVIDCATANPDDQKRALVIGGGIANFTDVAATFSGIIRALKEKESKLKAARMHIFVRRGGPNYQKGLALMRALGEDIGIPI…	ATGGCGCGTAAGAAGATCAGAGAGTATGACTCAAAGAGGTTGTTGAAGGAGCACTTTAAGAGACTTTCTGGCAAGGAGTTGCCGATCAAGTCTGCACAAATTACTGCATCAACTGATTTCACTGAGCTACAAGAGAAGGAACCCTGGCTTTCATCTTCTAAATTGGTTGTGAAACCTGACATGTTATTTGGAAAGCGTGGCAAAAGTGGTTTGGTTGCCTTAAATTTGGATTTTGCACAAGTTGTTTCGTTTGTGAAGGAGCGTCTTGGAAAAGAGGTTGAGATGAGTGGATGCAAAGGACCCATAACAACTTTCATTGTCGAACCTTTCATCCCACACAATGAAGAGTTTTACCTTAACATTGTCTCCGAGAGACTTGGGAACAGCATAAGCTTTTCA…
Chr01	GmHk_01G000281.1	3062986	3063802	+	-	hypothetical protein		IPR038765				CACTA, En Spm sub-class	S	MQRIDEENLNNTLKNGLRNRTERGHWQLFVLCPTNNLVVWFFSLHRKLDVHIKAAINNAFKTLKTTYEGKFDETTPRWIEVKSHVPSGGYECDYYVMHWMWNIIGWELKTDWMLWFAEGMPLDINTITTLWKKWTEYFFKT	ATGCAAAGGATAGACGAGGAGAATCTCAACAATACATTGAAAAATGGCTTAAGGAATCGCACCGAGAGGGGCCATTGGCAGCTCTTTGTTTTGTGTCCAACAAACAATCTTGTTGTGTGGTTTTTTTCTTTGCATAGAAAGCTAGATGTTCATATAAAAGCTGCAATTAACAATGCATTTAAGACATTAAAAACGACTTATGAGGGGAAATTTGATGAAACTACACCACGGTGGATTGAAGTGAAGAGTCACGTTCCAAGCGGAGGCTATGAGTGTGACTATTATGTCATGCATTGGATGTGGAACATAATCGGTTGGGAGTTGAAGACTGATTGGATGCTGTGGTTCGCTGAAGGCATGCCACTAGACATCAACACCATTACAACATTATGGAAAAAA…
Chr01	GmHk_01G000282.1	3069804	3072080	+	srprb_0	Signal recognition particle receptor subunit beta		IPR019009;IPR027417	PF09439	cd04105		atp gtp-binding protein	S	MEELEQWKEQLSHFANLALDRLLEVPPNQLYAAAAIVIFTTLLLLSIRLFKRAKSNTVVLAGLSGSGKTVIFYQLRDGSTHQGTVTSMEPNEGTFILHNEKTRKGKIKPVHVVDVPGHSRLRPKLDEYLPQAAGIVFVVDALDFLPNCRAASEYLYDLLTKGSVVRKKIPVLILCNKTDKVTAHTKEFIRKQMEKEIDKLRASRSAISAADIANEFTLGVPGEPFFFTQCSNKVTTADASGLTGEISQLEEFIREHVKQ	ATGGAAGAGTTGGAGCAGTGGAAGGAACAACTTTCTCACTTCGCTAACCTAGCTTTGGATCGTCTTCTCGAGGTTCCTCCGAATCAGCTCTACGCAGCTGCTGCAATCGTGATTTTCACAACGCTGCTTCTTCTCTCAATTCGGTTGTTCAAGCGTGCGAAGTCAAACACTGTTGTGTTGGCCGGGCTCAGCGGGAGTGGAAAAACTGTTATCTTCTATCAGCTTAGGGATGGCTCTACTCATCAGGGTACTGTTACATCAATGGAGCCTAATGAAGGCACTTTTATTCTTCACAACGAGAAAACAAGGAAGGGCAAGATAAAACCTGTTCATGTTGTTGATGTTCCTGGGCATTCTCGGCTTCGACCCAAACTGGATGAGTACTTGCCTCAAGCAGCT…
Chr01	GmHk_01G000283.1	3074501	3078623	-	-	hypothetical protein						NA	S	MAPDTTALSYWLNWRFFLCALFILLTMGLASFLIWKYEEFNKSRNERRERQRETAGSLYEYEAWNTCLKGIHPAWLLAYRIISFLVLFSLLTANVVADGGGIFYFYTQWTFTLVTIYFGLGSCVSIYGCRYKHNKIDCTTVNRADLDTEEGTYVAPTLDGTPELPNLYKNSNANQEPFTRNTAGVWGYIFQITFQTCAGAVVLTDVVFWLVLYPTYLNTKDFHLHFMDVCLHSLNAVFLLGDASLNCMRFPVFRFAYFILWTALFVIFQWIIHACVSLWWPYPFLDLSSPYAPLWYFGVGVMHIPCYGFFALIMKLKHLWLSKLFPGSCQFVR	ATGGCACCAGATACTACTGCCTTAAGTTATTGGTTGAATTGGAGGTTCTTCCTCTGTGCACTATTTATTTTATTAACTATGGGCCTAGCGTCATTTTTGATATGGAAGTATGAAGAATTCAATAAATCAAGGAATGAGAGAAGAGAAAGGCAGCGAGAAACGGCTGGATCGCTTTATGAGTATGAAGCATGGAATACATGTCTTAAAGGAATTCATCCTGCTTGGCTGCTTGCTTACAGGATAATTTCTTTTCTTGTGCTTTTTTCTTTGCTGACTGCCAATGTGGTTGCTGATGGAGGTGGCATATTTTATTTCTACACTCAGTGGACATTTACTTTGGTCACTATTTACTTTGGGCTTGGGTCTTGTGTCTCCATATATGGGTGTCGCTATAAACAC…
Chr01	GmHk_01G000284.1	3083417	3089250	+	RS27A	Ubiquitin-40S ribosomal protein S27a	GO:0003735;GO:0005515;GO:0005840;GO:0006412	IPR002906;IPR011332;IPR019954;IPR019956;IPR029071;IPR038582	PF00240;PF01599	cd01803		ubiquitin	O	MGQKVVKRKIKDKGDGTSSPIVDLSGMEATIREEIVATKKLAKKKEMKNLHSLAKWIETLTSIDFGDKNIDGTLEDNDKEEIMRNPSHSPGVTMQIFVKTLTGKTITLEVESSDTIDNVKAKIQDKEGIPPDQQRLIFAGKQLEDGRTLADYNIQKESTLHLVLRLRGGAKKRKKKTYTKPKKIKHKHKKVKLGILQFYKVDDSGKVQRLRKECPNAECGAGTFMANHFDRHYCGKCGLTYVYQKADA	ATGGGACAGAAGGTAGTCAAGAGGAAGATCAAGGACAAAGGAGATGGAACGTCTTCACCAATTGTGGACTTGTCAGGCATGGAAGCTACAATCAGGGAAGAAATTGTTGCCACCAAAAAGTTAGCAAAGAAAAAAGAGATGAAGAACCTCCATTCATTGGCAAAATGGATAGAAACTCTTACTTCAATAGACTTTGGAGATAAAAATATTGATGGAACACTTGAAGACAATGATAAAGAAGAAATCATGAGAAACCCTAGCCACTCTCCCGGCGTCACGATGCAGATCTTCGTGAAAACCCTAACGGGTAAAACGATCACGTTGGAGGTGGAGTCTTCGGACACCATCGACAACGTGAAGGCCAAGATCCAGGACAAGGAAGGCATCCCTCCGGACCAG…
Chr01	GmHk_01G000285.1	3097182	3099387	+	YAB4_1	Axial regulator YABBY 4	GO:0007275	IPR036910	PF04690			axial regulator YABBY	K	MMIDYECPSSTINASLCQKNYNFISLSLLSLPLSHTHSLTYKLQIQTDMSTLNHLFDLPEQICYVECGFCATILMVSVPSSSLSMVVTVKCGHCTSVLSVNMMKASFVPFHLLASLSHLETVSTLQPKESSSEQDANKTLKRHNASMMTYSDCEEEDAIPMSNVVNKPPEKRQRTPSAYNCFIKEEIKRLKAENPDMAHREAFSTAAKNWANFPPTQCKEDEESCSSQTDQHVDLDSQVDPNAVVNEEEGQGLRGRKVPKNSILERTPFE	ATGATGATTGATTATGAGTGTCCATCTTCAACTATAAATGCTTCCTTGTGTCAAAAGAACTACAATTTTATCTCTCTATCTCTTCTTTCTCTTCCTCTATCACATACACACTCTCTCACTTACAAGTTACAAATTCAGACAGATATGTCAACACTGAACCATCTTTTTGATCTTCCAGAACAGATATGTTATGTAGAATGTGGATTCTGTGCCACCATTTTAATGGTAAGTGTCCCAAGCAGCAGTTTGTCAATGGTGGTGACAGTAAAATGCGGACACTGCACAAGCGTCCTTTCTGTTAACATGATGAAAGCTTCTTTTGTCCCTTTCCACCTTTTAGCATCTCTTAGCCATCTTGAGACTGTCTCCACTCTCCAGCCAAAAGAAAGTAGTTCAGAA…
Chr01	GmHk_01G000285.2	3097182	3099387	+	YAB4_1	Axial regulator YABBY 4	GO:0007275	IPR036910	PF04690			axial regulator YABBY	K	MMIDYECPSSTINASLCQKNYNFISLSLLSLPLSHTHSLTYKLQIQTDMSTLNHLFDLPEQICYVECGFCATILMVSVPSSSLSMVVTVKCGHCTSVLSVNMMKASFVPFHLLASLSHLEPKESSSEQDANKTLKRHNASMMTYSDCEEEDAIPMSNVVNKPPEKRQRTPSAYNCFIKEEIKRLKAENPDMAHREAFSTAAKNWANFPPTQCKEDEESCSSQTDQHVDLDSQVDPNAVVNEEEGQGLRGRKVPKNSILERTPFE	ATGATGATTGATTATGAGTGTCCATCTTCAACTATAAATGCTTCCTTGTGTCAAAAGAACTACAATTTTATCTCTCTATCTCTTCTTTCTCTTCCTCTATCACATACACACTCTCTCACTTACAAGTTACAAATTCAGACAGATATGTCAACACTGAACCATCTTTTTGATCTTCCAGAACAGATATGTTATGTAGAATGTGGATTCTGTGCCACCATTTTAATGGTAAGTGTCCCAAGCAGCAGTTTGTCAATGGTGGTGACAGTAAAATGCGGACACTGCACAAGCGTCCTTTCTGTTAACATGATGAAAGCTTCTTTTGTCCCTTTCCACCTTTTAGCATCTCTTAGCCATCTTGAGCCAAAAGAAAGTAGTTCAGAACAAGATGCTAACAAGACT…
Chr01	GmHk_01G000286.1	3113356	3114750	-	NRPB10L_0	DNA-directed RNA polymerase subunit 10-like protein	GO:0003677;GO:0003899;GO:0006351;GO:0008270	IPR020789;IPR023580	PF01194			DNA-dependent RNA polymerase catalyzes the transcription of DNA into RNA using the four ribonucleoside triphosphates as substrates	K	MIIPVRCFTCGKVIGNKWDTYLDLLQSDYSEGSVVTLWSCVITLIAGDALDALGLVRYCCRRMLMTHVDLIEKLLNYNTLDKSDPS	ATGATCATCCCCGTTCGTTGTTTCACCTGCGGAAAGGTCATTGGAAACAAATGGGATACCTATTTGGACCTTCTGCAGTCAGATTACAGTGAAGGGTCGGTTGTTACTCTTTGGTCATGTGTAATAACTTTAATTGCTGGAGATGCACTGGATGCTTTGGGACTGGTTCGATATTGCTGTAGGCGCATGCTTATGACCCATGTCGATCTCATTGAGAAGTTACTGAATTACAACACTCTGGACAAGTCTGATCCCAGTTAA
Chr01	GmHk_01G000287.1	3123163	3125292	+	BOI_2	E3 ubiquitin-protein ligase BOI		IPR001841;IPR013083;IPR017066	PF13920			protein binding zinc ion binding	S	MLGGNNGNRLLPVFLDETQFRHQTNVSNQLQLFGNLQAGCSVDPVNYFGNEHISSMIQPNKQSKEMEDISKQRLQISLNYNVHQDDADQLASIPNPNPVSTGLRLSYDDDERNSSVTSASGSMTATPSIILSFGDNIRTELDRQQEELDQYVKLQKEQLSKGVRDMKQKHVAALLTSIEKGINTKLKEKDVEIENMNRKNRELAERIKQVAVEAQSWHYRAKYNESVVNTLRNNLQQAISQGAEQGKEGFGESEVDDDASYIDPNNFLNIPAAPINSTHKSYQDMENLTCRACKTKTVSMLLMPCRHLCLCKDCEGFINVCPVCQLIKTASVEVYLS	ATGTTGGGAGGCAACAATGGAAATCGCTTGCTTCCTGTTTTCTTGGACGAAACTCAATTTCGGCATCAAACTAATGTGTCAAATCAGTTGCAGTTGTTTGGAAATTTACAAGCTGGATGTAGTGTTGACCCAGTTAATTACTTTGGAAATGAGCATATCAGCTCCATGATTCAGCCTAATAAACAAAGCAAGGAAATGGAAGATATATCGAAACAAAGGCTTCAGATTTCCTTAAACTACAATGTTCATCAAGATGATGCTGATCAATTAGCAAGTATTCCAAATCCTAACCCTGTGTCAACAGGATTGAGGCTTTCATATGATGATGATGAGCGTAACTCATCTGTTACTTCTGCAAGTGGCAGCATGACTGCCACACCGTCTATCATATTGTCTTTT…
Chr01	GmHk_01G000287.2	3123163	3125292	+	BOI_2	E3 ubiquitin-protein ligase BOI		IPR001841;IPR013083;IPR017066	PF13920			protein binding zinc ion binding	S	MLGGNNGNRLLPVFLDETQFRHQTNVSNQLQLFGNLQAGCSVDPVNYFGNEHISSMIQPNKQSKEMEDISKQRLQISLNYNVHQDDADQLASIPNPNPVSTGLRLSYDDDERNSSVTSASGSMTATPSIILSFGDNIRTELDRQQEELDQYVKLQKEQLSKGVRDMKQKHVAALLTSIEKGINTKLKEKDVEIENMNRKNRELAERIKQVAVEAQSWHYRAKYNESVVNTLRNNLQQAISQGAEQGKEGFGESEVDDDASYIDPNNFLNIPAAPINSTHKSYQDMENLTCRACKTKTVSMLLMPCRHLCLCKDCEGFINVCPVCQLIKTASVEVYLS	ATGTTGGGAGGCAACAATGGAAATCGCTTGCTTCCTGTTTTCTTGGACGAAACTCAATTTCGGCATCAAACTAATGTGTCAAATCAGTTGCAGTTGTTTGGAAATTTACAAGCTGGATGTAGTGTTGACCCAGTTAATTACTTTGGAAATGAGCATATCAGCTCCATGATTCAGCCTAATAAACAAAGCAAGGAAATGGAAGATATATCGAAACAAAGGCTTCAGATTTCCTTAAACTACAATGTTCATCAAGATGATGCTGATCAATTAGCAAGTATTCCAAATCCTAACCCTGTGTCAACAGGATTGAGGCTTTCATATGATGATGATGAGCGTAACTCATCTGTTACTTCTGCAAGTGGCAGCATGACTGCCACACCGTCTATCATATTGTCTTTT…
Chr01	GmHk_01G000287.3	3123163	3125292	+	BOI_2	E3 ubiquitin-protein ligase BOI		IPR001841;IPR013083;IPR017066	PF13920			protein binding zinc ion binding	S	MLGGNNGNRLLPVFLDETQFRHQTNVSNQLQLFGNLQAGCSVDPVNYFGNEHISSMIQPNKQSKEMEDISKQRLQISLNYNVHQDDADQLASIPNPNPVSTGLRLSYDDDERNSSVTSASGSMTATPSIILSFGDNIRTELDRQQEELDQYVKLQKEQLSKGVRDMKQKHVAALLTSIEKGINTKLKEKDVEIENMNRKNRELAERIKQVAVEAQSWHYRAKYNESVVNTLRNNLQQAISQGAEQGKEGFGESEVDDDASYIDPNNFLNIPAAPINSTHKSYQDMENLTCRACKTKTVSMLLMPCRHLCLCKDCEGFINVCPVCQLIKTASVEVYLS	ATGTTGGGAGGCAACAATGGAAATCGCTTGCTTCCTGTTTTCTTGGACGAAACTCAATTTCGGCATCAAACTAATGTGTCAAATCAGTTGCAGTTGTTTGGAAATTTACAAGCTGGATGTAGTGTTGACCCAGTTAATTACTTTGGAAATGAGCATATCAGCTCCATGATTCAGCCTAATAAACAAAGCAAGGAAATGGAAGATATATCGAAACAAAGGCTTCAGATTTCCTTAAACTACAATGTTCATCAAGATGATGCTGATCAATTAGCAAGTATTCCAAATCCTAACCCTGTGTCAACAGGATTGAGGCTTTCATATGATGATGATGAGCGTAACTCATCTGTTACTTCTGCAAGTGGCAGCATGACTGCCACACCGTCTATCATATTGTCTTTT…
Chr01	GmHk_01G000288.1	3127205	3130145	+	TIF3I1_0	Eukaryotic translation initiation factor 3 subunit I	GO:0003743;GO:0005515;GO:0005737;GO:0005852	IPR015943;IPR017986;IPR019775;IPR027525;IPR036322	PF00400	cd00200		Component of the eukaryotic translation initiation factor 3 (eIF-3) complex, which is involved in protein synthesis and, together with other initiation factors, stimulates binding of mRNA and methionyl-tRNAi to the 40S ribosome (By similarity)	J	MRPILMKGHERPLTFLKYNRDGDLLFSCAKDHNPTVWFADNGERLGTYRGHNGAVWCCDVSSKLFITTAKLWNVQTGQQLFTFNFDSPARSVDFAVGDKLAVITTDPFMELPSAIHVKRIANDPAEQTGESVLLIKGPQGRINRAIWGPLNRTIISAGEDAVIRIWDSETGKLLKESDKESGHKKTVTSLAKSADGSHFLTGSLDKSARLWDTRTLTLIKTYVTERPVNAVAMSPLLDHVVLGGGQDASAVTTTDHRAGKFEAKFYDKILQEEIGGVKGHFGPINALAFNPDGKSFSSGGEDGYVRLHHFDPDYFNIKI	ATGAGGCCGATTCTGATGAAAGGCCACGAGAGGCCACTGACGTTCCTCAAGTACAACAGGGACGGCGATCTCCTCTTCTCCTGCGCCAAGGACCACAACCCCACCGTCTGGTTCGCCGACAACGGCGAACGCCTCGGCACCTACCGCGGCCACAACGGCGCCGTTTGGTGCTGCGACGTCTCAAGCAAGCTCTTCATCACTACCGCCAAGCTATGGAACGTGCAGACCGGTCAGCAGTTGTTCACCTTCAATTTCGATTCCCCGGCGAGGTCCGTGGATTTCGCGGTCGGCGATAAGCTTGCCGTTATAACCACTGATCCCTTTATGGAATTGCCCTCTGCAATCCATGTCAAACGCATTGCTAACGATCCTGCTGAACAGACTGGGGAATCTGTGCTT…
Chr01	GmHk_01G000289.1	3139413	3141812	+	ARF_0	ADP-ribosylation factor 2	GO:0005525	IPR006689;IPR027417	PF00025	cd04150	TIGR00231	GTP-binding Protein	S	MGLTFTKLFSRLFAKKEMRILMVGLDAAGKTTILYKLKLGEIVTTIPTIGFNVETVEYKNISFTVWDVGGQDKIRPLWRHYFQNTQGLIFVVDSNDRDRVVEARDELHRMLNEDELRDAVLLVFANKQDLPNAMNAAEITDKLGLHSLRQRHWYIQSTCATSGEGLYEGLDWLSNNIANKDISVLNCSRILLLGMRNTLIFLLGLDAMSITVMDTNSMRHRVLSDL	ATGGGGCTGACATTCACAAAGCTTTTCAGTCGGCTTTTCGCGAAGAAGGAAATGCGAATTCTGATGGTTGGTCTTGATGCTGCTGGTAAGACCACTATCCTGTACAAGCTCAAGCTCGGAGAGATCGTTACCACAATTCCTACCATCGGGTTCAATGTTGAGACTGTGGAATACAAGAACATTAGCTTCACTGTTTGGGATGTTGGTGGCCAGGACAAGATTCGTCCCTTGTGGAGGCACTACTTCCAGAACACCCAGGGTCTTATTTTTGTTGTAGACAGCAATGATAGGGACAGAGTTGTTGAGGCCAGAGATGAGTTGCATAGGATGTTGAATGAGGATGAACTGAGAGATGCAGTATTGCTTGTGTTTGCCAATAAACAAGATCTTCCTAATGCA…
Chr01	GmHk_01G000290.1	3142352	3147575	-	MTOPVIB_0	Type 2 DNA topoisomerase 6 subunit B-like						NA	S	MADIQSKQEASSSTTFVSNSIFVCKRISYLLVFASARSQKFQCNVRILDYGSVKPIHTLMGLAIGSYHGPTDLTYQRCRLSEQICRLAVILTRSSSSHPSLQISISDTGIGSCLEEFQDLRFSSTDMECFLSKPPSLDIVGISDTEIHNYQINLKGSVCMYSFVSLDLLLADIHTFLQKMLILKIPNVAIQLVAEDCDVPESRYEKVFLTNECKKLPMSASNLELLKSGIEDYVLKHGNNLSNKEQRKVGSGEACCTDNRLHIELVMEAAIVISNISMQNTTCFREYGNKTEVLYFKDFSPCTISQSSVKALQSIDWKTYGLNLGGIVEQDGVTLLEWENFPTDTHIDIVLHSYHKQYPALNRSFLSLSETFEVLKHTTIPAPRKMSPLVRNLVKKAVK…	ATGGCAGATATTCAGTCAAAACAAGAAGCATCGTCATCAACAACATTTGTCAGCAATAGCATATTTGTCTGCAAAAGGATTTCATACTTGCTTGTCTTTGCGAGTGCAAGAAGTCAGAAATTTCAGTGTAACGTCCGAATACTTGATTATGGATCAGTGAAGCCCATCCACACGTTAATGGGCCTGGCTATCGGGTCGTACCATGGGCCCACCGATTTAACGTATCAGAGATGCCGATTATCGGAGCAGATTTGCAGACTCGCGGTTATTCTCACTCGTTCTTCATCTTCGCATCCTTCTCTTCAAATCTCTATCTCTGATACTGGCATTGGGAGCTGCTTGGAGGAATTTCAGGACTTGAGGTTTTCTTCCACGGATATGGAATGCTTTCTCTCAAAA…
Chr01	GmHk_01G000291.1	3150465	3150914	+	-	hypothetical protein						NA	S	MSLQVQPQTQPQPLMQQQQQPVQVYPTSVTYESPPHHSNGSFGSVFVVLAIIIVISAVACCLGRLCNRRGGHSHNQKHVKPQKKQQQQQNHHNFRPKEVDIEFGFDKRIAASKPNGHGAGRGIKPLPHHGDVKTFEMKLGHQGKIRPGP	ATGTCTTTACAAGTTCAGCCACAGACACAGCCACAGCCACTGATGCAGCAGCAACAGCAACCTGTCCAGGTCTATCCTACCAGTGTCACATATGAGTCACCACCCCACCATTCAAATGGCTCTTTTGGGTCAGTTTTTGTTGTTTTGGCTATAATTATAGTCATTTCTGCAGTTGCTTGCTGCCTTGGAAGGCTTTGCAACCGTCGCGGTGGCCACAGCCACAACCAGAAACATGTTAAGCCACAAAAGAAGCAGCAGCAGCAGCAGAACCACCACAACTTCCGTCCAAAAGAAGTGGACATCGAATTCGGGTTTGACAAGAGAATCGCAGCTTCCAAGCCTAATGGACATGGAGCAGGCAGGGGAATCAAGCCACTTCCTCATCATGGTGACGTGAAA…
Chr01	GmHk_01G000292.1	3153577	3154765	+	RGA3_0	Putative disease resistance protein RGA3		IPR038005;IPR041118	PF18052	cd14798		leucine Rich Repeat	S	MVEAALKGVFENLSSLIGKELGLFLGFDQDLKKRLASLLTAILAMHEDAEEKQFSDISLKDWLLKLRDAAHELDDIMDEYAYEKLQLEYEGVNSCLSEFVKISCLSSFHPMHVFSYYKTVKKMKSLGRLRKTTLVQLIFNHEKVVNHSELRIWMLEMLVPGGVWNELYWRSFFQDIETHTFGKITRFKMHDLIHDLAQFVVKERVVVAFRMTMV	ATGGTTGAGGCTGCACTTAAAGGTGTGTTTGAAAATTTGAGTTCTCTCATTGGAAAAGAGCTGGGACTATTTCTGGGTTTTGATCAAGACTTGAAAAAAAGGCTTGCTAGCTTACTCACTGCTATCTTGGCTATGCATGAAGATGCCGAGGAGAAACAATTCTCAGACATATCTTTAAAGGATTGGCTGCTAAAGCTAAGAGATGCAGCTCATGAGCTGGATGACATCATGGACGAGTATGCCTATGAAAAACTGCAGTTGGAATATGAAGGAGTCAACTCTTGTCTATCAGAATTTGTAAAAATCTCTTGCTTATCCTCTTTTCATCCTATGCACGTTTTTTCCTATTACAAAACTGTTAAGAAAATGAAAAGTCTTGGCAGACTTAGAAAAACAACA…
Chr01	GmHk_01G000293.1	3158033	3162699	-	PERK13_0	Proline-rich receptor-like protein kinase PERK13	GO:0004672;GO:0005524;GO:0006468	IPR001245;IPR008271;IPR011009	PF07714	cd14066		Serine Threonine protein kinase	T	MAKNTSSNESSSLNSDKDKASAPLPSSDDSESPKSTPPKSPPPSPPLPPSPPKKSAPPPTESPPAPAHSSPPTPSQSPPPTPPHSPPPSPSPPTPPPEKSPPSPSNSPPPPSTPPPSKDSAPPPSPSEPPPSPPPSPPPPPPQNSPPSPQSLTPPPHSLSPPTAISTPPSPASHVTPPPAPLGSGPNHPSPPRPPPSTQPKPRGTPPKSDPPSSSPSSGNNTGEIVGLALAGVFIIAFLALVIFFMFGRKQKRASVYAMPPPRKSHMKGGDVHYYVEEPGFGSGALGAMNLRTPSETTQHMNTGQLVFTYEKVAEITNGFASENIIGEGGFGYVYKASMPDGRVGALKLLKAGSGQGEREFRAEVDIISRIHHRHLVSLIGYCISEQQRVLIYEFVPNG…	ATGGCTAAGAATACATCGTCAAATGAGTCGTCTTCATTGAATTCCGACAAGGACAAGGCTTCCGCTCCGTTGCCGTCATCGGATGACTCAGAGTCTCCGAAAAGCACACCACCAAAGTCTCCGCCACCATCGCCGCCGCTGCCACCATCACCGCCGAAAAAATCTGCTCCTCCGCCAACAGAATCTCCGCCGGCGCCGGCGCATTCTTCACCGCCAACTCCGTCACAATCCCCGCCACCAACTCCGCCTCATTCTCCACCACCTTCCCCTTCTCCGCCAACTCCACCGCCGGAAAAATCACCACCGTCTCCGTCTAATTCTCCGCCGCCTCCATCAACTCCCCCGCCGTCAAAAGATTCAGCTCCTCCACCCTCTCCGTCAGAACCACCACCTTCGCCA…
Chr01	GmHk_01G000294.1	3168665	3169420	+	-	hypothetical protein		IPR012442	PF07816			Protein of unknown function (DUF1645)	S	MQAVSLSPLSFRDSSDEFAGKFEHDFMAKLKINEEKVENENEEKHNEDEIEEEEEEEEEEEEEEFSFVLTNSDGSPISADDAFDNGQIRPIFPIFNQDLLFSDDYDGGEGLRQPIKVFVEHKDEFLSEAAPAEGAYCEWNPKAAVKSNSTGFSKLWRFRDVKLRSNSDGKDAFVFLNHAAPAKPAEKARSVVVKKGKTTTTTAAASAHEKHYIMSRARKESDKRKSYLPYKQNMLGFFANANGLSRNVHPY	ATGCAAGCCGTTTCGCTCTCACCTTTGTCGTTTAGGGATTCTTCCGACGAGTTCGCTGGAAAGTTCGAACACGATTTCATGGCCAAGCTCAAAATCAACGAAGAGAAAGTCGAAAACGAAAACGAAGAGAAGCATAACGAAGATGAGATAGAAGAAGAAGAAGAAGAAGAAGAAGAAGAAGAAGAGGAAGAGTTTAGCTTCGTTCTCACGAATTCCGATGGATCGCCGATCTCCGCCGACGACGCGTTCGACAACGGCCAGATTCGTCCGATTTTTCCGATTTTCAACCAGGATCTTCTGTTCTCCGACGATTACGACGGCGGAGAAGGTCTCCGGCAGCCGATAAAGGTCTTCGTCGAACATAAGGATGAATTTCTGTCGGAGGCGGCGCCGGCGGAA…
Chr01	GmHk_01G000295.1	3173608	3177064	-	AMSH2_2	AMSH-like ubiquitin thioesterase 2	GO:0005515		PF01398			Component of the eukaryotic translation initiation factor 3 (eIF-3) complex, which is involved in protein synthesis and, together with other initiation factors, stimulates binding of mRNA and methionyl-tRNAi to the 40S ribosome (By similarity)	S	MYKRSNEEKDVSSKKVRNCDTAESNIQSAIVDGEDTSEIPSFPLGNLSTSWCSLVCKPAAIKTANRYFLLQKVTQSWPSPALCFVETVPQDAQSSHVTAFNSGDGSSKSDNERDVHISMRLMEDFLDLAKENTEKDLETCGILGAYLEKGTLYLTTLIIPKQESASNSCQATNEEEVFKILNERSLYPVGWIHVCLPTYFAIDSVNVGWVRFGEKISIQTNLTCQLLGSKYHQIRDETQQLTACFDHIYVTSYWWSKTTILIRKTNVPLHTCEVAVGNILSIYLRVGWVRPRGLDSGLIGEAYPNRPSLCWEHVLGTGCDIKNSKLTIDLVLVGLSLNTSFSKLFHVIGGSAHSIFLPDHVWTHSLVLFYQVMIPEAFAIVLAPNDTSRSCGLFRLTKP…	ATGTACAAAAGGTCTAATGAAGAAAAGGATGTAAGTAGTAAGAAGGTTAGAAATTGTGATACAGCAGAAAGCAATATTCAAAGCGCGATTGTCGATGGCGAGGACACATCTGAGATTCCATCATTCCCATTAGGAAATTTGAGTACTAGTTGGTGCTCACTGGTTTGTAAACCGGCTGCTATTAAGACAGCCAACAGATACTTCTTGCTTCAAAAAGTAACTCAGTCCTGGCCTTCCCCTGCCTTGTGTTTTGTGGAGACAGTGCCTCAAGATGCACAAAGTTCTCATGTTACAGCTTTTAATTCAGGTGATGGATCCTCAAAGTCGGACAACGAACGGGATGTTCATATTTCAATGCGGTTAATGGAGGACTTTCTTGATCTTGCTAAAGAAAATACA…
Chr01	GmHk_01G000295.2	3173608	3177064	-	AMSH2_2	AMSH-like ubiquitin thioesterase 2	GO:0005515		PF01398			Component of the eukaryotic translation initiation factor 3 (eIF-3) complex, which is involved in protein synthesis and, together with other initiation factors, stimulates binding of mRNA and methionyl-tRNAi to the 40S ribosome (By similarity)	S	MYKRSNEEKDVSSKKVRNCDTAESNIQSAIVDGEDTSEIPSFPLGNLSTSWCSLVCKPAAIKTANRYFLLQKVTQSWPSPALCFVETVPQDAQSSHVTAFNSGDGSSKSDNERDVHISMRLMEDFLDLAKENTEKDLETCGILGAYLEKGTLYLTTLIIPKQESASNSCQATNEEEVFKILNERSLYPVGWIHVCLPTYFAIDSVNVGWVRFGEKISIQTNLTCQLLGSKYHQIRDETQQLTACFDHIYVTSYWWSKTTILIRKTNVPLHTCEVAVGNILSIYLRVGWVRPRGLDSGLIGEAYPNRPSLCWEHVLGTGCDIKNSKLTIDLVLTHPSQSCFMSSVDLHTQYSYQVMIPEAFAIVLAPNDTSRSCGLFRLTKPEGMNILKNCQETGFHPHK…	ATGTACAAAAGGTCTAATGAAGAAAAGGATGTAAGTAGTAAGAAGGTTAGAAATTGTGATACAGCAGAAAGCAATATTCAAAGCGCGATTGTCGATGGCGAGGACACATCTGAGATTCCATCATTCCCATTAGGAAATTTGAGTACTAGTTGGTGCTCACTGGTTTGTAAACCGGCTGCTATTAAGACAGCCAACAGATACTTCTTGCTTCAAAAAGTAACTCAGTCCTGGCCTTCCCCTGCCTTGTGTTTTGTGGAGACAGTGCCTCAAGATGCACAAAGTTCTCATGTTACAGCTTTTAATTCAGGTGATGGATCCTCAAAGTCGGACAACGAACGGGATGTTCATATTTCAATGCGGTTAATGGAGGACTTTCTTGATCTTGCTAAAGAAAATACA…
Chr01	GmHk_01G000295.3	3173608	3177064	-	AMSH2_2	AMSH-like ubiquitin thioesterase 2	GO:0005515	IPR037518	PF01398	cd08066		Component of the eukaryotic translation initiation factor 3 (eIF-3) complex, which is involved in protein synthesis and, together with other initiation factors, stimulates binding of mRNA and methionyl-tRNAi to the 40S ribosome (By similarity)	S	MYKRSNEEKDVSSKKVRNCDTAESNIQSAIVDGEDTSEIPSFPLGNLSTSWCSLVCKPAAIKTANRYFLLQKVTQSWPSPALCFVETVPQDAQSSHVTAFNSGDGSSKSDNERDVHISMRLMEDFLDLAKENTEKDLETCGILGAYLEKGTLYLTTLIIPKQESASNSCQATNEEEVFKILNERSLYPVGWIHTHPSQSCFMSSVDLHTQYSYQVMIPEAFAIVLAPNDTSRSCGLFRLTKPEGMNILKNCQETGFHPHKEPDNGSPVYEHCSNVYKNSNLRFEIFDLRQK	ATGTACAAAAGGTCTAATGAAGAAAAGGATGTAAGTAGTAAGAAGGTTAGAAATTGTGATACAGCAGAAAGCAATATTCAAAGCGCGATTGTCGATGGCGAGGACACATCTGAGATTCCATCATTCCCATTAGGAAATTTGAGTACTAGTTGGTGCTCACTGGTTTGTAAACCGGCTGCTATTAAGACAGCCAACAGATACTTCTTGCTTCAAAAAGTAACTCAGTCCTGGCCTTCCCCTGCCTTGTGTTTTGTGGAGACAGTGCCTCAAGATGCACAAAGTTCTCATGTTACAGCTTTTAATTCAGGTGATGGATCCTCAAAGTCGGACAACGAACGGGATGTTCATATTTCAATGCGGTTAATGGAGGACTTTCTTGATCTTGCTAAAGAAAATACA…
Chr01	GmHk_01G000296.1	3179908	3188608	+	CAHC_0	Carbonic anhydrase, chloroplastic	GO:0004089;GO:0008270;GO:0015976	IPR015892;IPR036874	PF00484			carbonic anhydrase	P	MFVVLKVKRVMAGALKKCMMLCCTSKIVSKEEMAGESYEEAITSLTKLLSEKAELGGVAAAKIKELTAELDAAGSKPFNPEERIRTGFIHFKNEKFEKNPYLYGELAKGQSPKFMVFACSDSRVCPSHILDFQPGEAFMVRNIANMVPPYDKTKYSGAGAAIEYAVLHLKVENIVVIGHSCCGGIKGLMSIPDDGTTARQVLYVAIACVS	ATGTTTGTTGTTCTAAAGGTAAAGAGAGTCATGGCTGGAGCATTAAAAAAGTGCATGATGCTGTGTTGCACGAGCAAGATTGTCTCGAAGGAAGAGATGGCAGGAGAATCATACGAGGAAGCCATCACGAGTCTGACCAAGCTTCTCAGTGAGAAAGCTGAGCTCGGTGGCGTTGCCGCCGCAAAGATAAAGGAGCTGACGGCGGAGCTTGATGCCGCCGGTTCGAAGCCGTTTAACCCGGAGGAGAGGATCAGAACCGGGTTTATTCACTTTAAGAATGAGAAATTTGAGAAAAATCCTTATCTATATGGTGAGCTTGCCAAAGGCCAGAGCCCAAAGTTTATGGTATTTGCATGCTCAGACTCGAGAGTTTGTCCATCTCATATTCTGGATTTCCAA…
Chr01	GmHk_01G000297.1	3193373	3195679	-	At4g28440_0	Uncharacterized protein At4g28440		IPR012340		cd04491		DNA-binding protein-related	S	MADSKSGLRKPVFIKVDQLRPGTSGHTLTVKVVNAKMVMQRGRSDGPQSRQMRIAECLVGDETGMIIFTARNDQVDTMTEGATVILRNAKIDMFKGSMRLAVDKWGRVELTEPASFTVKEDNNLSLIEYELVNVVVE	ATGGCAGATTCAAAATCAGGATTGAGGAAACCAGTGTTCATCAAGGTTGATCAGCTTCGCCCGGGGACAAGTGGGCACACTTTAACTGTGAAGGTAGTCAATGCTAAGATGGTGATGCAGAGAGGTCGTTCTGATGGTCCTCAATCCCGGCAAATGCGAATTGCTGAGTGCTTGGTTGGTGATGAGACTGGAATGATCATATTCACTGCCAGAAATGATCAAGTGGATACGATGACAGAGGGTGCTACTGTGATCCTGCGTAATGCCAAAATTGACATGTTCAAAGGATCAATGAGGCTTGCTGTGGACAAGTGGGGCCGTGTAGAACTCACAGAACCTGCTAGTTTCACTGTGAAGGAAGATAATAACTTGTCTCTCATTGAGTATGAATTGGTGAAT…
Chr01	GmHk_01G000298.1	3224631	3226627	+	PGL3_0	Polygalacturonase 1 beta-like protein 3		IPR004873	PF03181			Noncatalytic subunit	S	MNKQLTLLCLFILFSFLSVGFAGAGDAAEKNPFTPKAFAIRYWDKEIRSGLAKPQFLLSKASPLNAAEAAAFVKLASGNALSTRLPEFCAAAKLLCFPEVGSSLEKHDKDANFAVYRDKNFTNYGTGRPGGLDSFKNYSEGENIPVNDFRRYSRDSAGHKDGFLSYGTSGNVVQQSFHTYAAGATGGAGEFKRYADETNVPNLGFTSYSDNANGRTQSFTSYSENGNAGEQTFTSYGKNGNGPTNVFTSYGTESNVVGSGFSNYVETANAANDTFKGYGVDMNNPTNTFSNYAGGGNGAVERFSSYRDKANVGADSFTSYAKSANAADIGFSNYGKSFNEGTDTFTSYAKSSDGETKVGFTSYGVNNTFKDYEKKGTTVSFARYTNISTTLSASASASS…	ATGAACAAACAACTCACGCTGCTCTGTCTCTTTATCCTCTTCTCATTTCTCAGTGTGGGTTTCGCCGGCGCCGGAGACGCGGCGGAGAAAAACCCTTTCACCCCAAAAGCCTTCGCCATTCGTTATTGGGACAAAGAGATCCGCAGCGGGTTGGCGAAGCCACAGTTTCTTCTGTCTAAGGCGTCGCCGCTAAACGCGGCGGAGGCGGCGGCGTTTGTGAAGCTTGCCTCCGGCAACGCGCTCTCCACGCGGCTGCCGGAATTCTGCGCCGCCGCGAAGCTCCTCTGCTTCCCGGAGGTGGGGTCCAGCCTCGAGAAGCACGACAAAGACGCAAACTTTGCAGTGTACAGAGACAAGAACTTCACCAACTATGGAACGGGTCGACCCGGTGGGCTCGAC…
Chr01	GmHk_01G000299.1	3233585	3235152	+	-	hypothetical protein						transposon protein	S	MNDLLEQFKSNTCEDDELIEQASYLAVFIGKYAIKNLCKESCRTNKQTRHAWVQEVLQGHLIRCYEMFRMEKNIFYKLCYELADQGLKPTNCIHVHKVLIALLKLFMEYIRPLDPLFHDSHVKIENDTQYWSFFKNAIKAIDGTHVPCVVTPSEQARFIGRKARWKGTAHDARIFDHALTTSNMNFPHPPKGIIFLYHYN	ATGAATGACTTGCTTGAACAATTTAAATCAAATACCTGTGAAGATGATGAACTTATAGAGCAAGCATCTTATTTGGCAGTGTTTATTGGTAAATATGCAATAAAAAATCTATGTAAAGAGTCATGTAGAACCAACAAACAAACAAGGCATGCATGGGTGCAAGAAGTATTGCAAGGTCATCTTATTCGTTGTTATGAGATGTTTCGTATGGAAAAAAATATTTTTTATAAGCTTTGCTATGAATTGGCTGATCAGGGTTTAAAGCCCACTAATTGCATACATGTCCACAAGGTATTAATTGCTCTCCTTAAGTTGTTTATGGAATATATTAGGCCACTAGATCCTTTATTTCATGATAGTCATGTCAAAATAGAAAATGATACACAATATTGGTCATTT…
Chr01	GmHk_01G000300.1	3247383	3249682	+	-	hypothetical protein		IPR010341	PF06075			expressed protein	S	MATLAPGILLKLLNGLNTGVKPTSEHRSSLLQVTDIVPADLDEKNLIPKQGFYIKVSDSSHSIYASLPSDQDDVVLSNKMQLGQFIYVDRLEPGSPVPVLKGAKPLPGRHPLVGTPEPLMGLRDQNQNQNQNQKLNSAPRRGSWGTSCDGGFNFKPVNLDFEQCTPVKVRNGGFQPVSSSPLIRGKVGREGTTPGSGVRSSVGGGLLAKISDAKVESPALLRKSCVVATSNSKFTRSRSVSEREHRIPASPFKSAEKKSGTPPPRLRNARVITPSSSSSFSSGDAQGHNTDTSVASQPQSQSTTNSAFDNCNNLSLPMNLPGKLSSLGKEAMQQREVAQKIALQALRDASATETVVRSLKMFSNLCKSARTDAPLACFERFLEFHNEIVQAVNEMVSIQ…	ATGGCAACACTCGCTCCCGGGATTTTGTTGAAGCTCCTCAACGGATTGAACACCGGCGTGAAACCCACGAGCGAGCACCGTAGCTCACTCCTGCAAGTCACCGACATCGTCCCCGCCGATCTCGACGAAAAAAACCTAATCCCCAAACAGGGTTTTTACATAAAGGTTTCTGATTCCTCTCACTCTATCTACGCGAGTCTTCCCTCGGACCAAGACGACGTCGTTCTCAGCAACAAGATGCAGCTCGGGCAGTTCATCTACGTCGACCGGCTCGAACCGGGCTCTCCGGTTCCCGTCCTGAAAGGGGCCAAGCCCCTCCCCGGAAGACACCCTCTGGTCGGCACGCCAGAACCCTTAATGGGACTCAGAGACCAAAACCAAAACCAAAACCAAAACCAA…
Chr01	GmHk_01G000301.1	3254137	3260173	+	RBM25_1	RNA-binding protein 25	GO:0003676;GO:0006397	IPR002483;IPR012677;IPR034268;IPR035979;IPR036483	PF00076;PF01480	cd12446		RNA binding motif protein 25	S	MADSASSPATLPPNPQPSQSAPDLLSQSATPPSSTPLATNPNPNPTLLPPPPTLHFLAGTPPQVPGVLPPSFRPLGPQVPQFSPVPAPNPAYQNPAVPPPGVPGATVAVPPPQMQAMMSYQVQPGNPAMRPFAPIPNGYAAAPNVTPAEYFPFNGFMNSRSRQCLQLNECTRWPCVMRLSFQLLIVGCAAISVMLLMCGIPRYPPPYGTMVRPVFPARPPGAVNIPTISRPPVAGIPAVRPIIPPVVRPVVAPSVTPAEKPQNTVYIGKIAPTVENEFMLSLLQLCGTIKTWKRPQDLSTGTPTSFGFYEFESAEGVLRALRLLTKLNIDGQELKVNVNQAMKEILELYVKTKTENLKNKETQEVGEKNEGEQPSNANEDAKVDTEPSNKEASESSNKE…	ATGGCGGATTCCGCCTCTTCCCCCGCAACCCTTCCTCCCAATCCCCAACCCTCCCAATCCGCACCCGATCTACTCTCCCAATCCGCAACACCACCCTCATCCACTCCCCTCGCCACAAACCCTAATCCCAACCCAACGCTGCTTCCTCCGCCGCCCACTCTCCACTTTCTGGCGGGCACTCCGCCGCAGGTCCCCGGCGTCCTCCCTCCCTCTTTCCGGCCGCTCGGGCCTCAGGTGCCGCAATTCTCCCCCGTCCCGGCGCCCAACCCGGCCTACCAAAACCCTGCTGTCCCGCCGCCCGGCGTTCCCGGCGCCACCGTGGCAGTTCCGCCGCCGCAGATGCAGGCTATGATGTCGTACCAGGTTCAGCCCGGTAACCCGGCCATGCGGCCCTTCGCT…
Chr01	GmHk_01G000301.2	3254137	3260173	+	RBM25_1	RNA-binding protein 25	GO:0003676;GO:0006397	IPR002483;IPR012677;IPR034268;IPR035979;IPR036483	PF00076;PF01480	cd12446		RNA binding motif protein 25	S	MADSASSPATLPPNPQPSQSAPDLLSQSATPPSSTPLATNPNPNPTLLPPPPTLHFLAGTPPQVPGVLPPSFRPLGPQVPQFSPVPAPNPAYQNPAVPPPGVPGATVAVPPPQMQAMMSYQVQPGNPAMRPFAPIPNGYAAAPNVTPAGIPRYPPPYGTMVRPVFPARPPGAVNIPTISRPPVAGIPAVRPIIPPVVRPVVAPSVTPAEKPQNTVYIGKIAPTVENEFMLSLLQLCGTIKTWKRPQDLSTGTPTSFGFYEFESAEGVLRALRLLTKLNIDGQELKVNVNQAMKEILELYVKTKTENLKNKETQEVGEKNEGEQPSNANEDAKVDTEPSNKEASESSNKESHDVANFGIVTDEDREADCEALEKITKMIEERLKTRPLPTPPAQPTGDGS…	ATGGCGGATTCCGCCTCTTCCCCCGCAACCCTTCCTCCCAATCCCCAACCCTCCCAATCCGCACCCGATCTACTCTCCCAATCCGCAACACCACCCTCATCCACTCCCCTCGCCACAAACCCTAATCCCAACCCAACGCTGCTTCCTCCGCCGCCCACTCTCCACTTTCTGGCGGGCACTCCGCCGCAGGTCCCCGGCGTCCTCCCTCCCTCTTTCCGGCCGCTCGGGCCTCAGGTGCCGCAATTCTCCCCCGTCCCGGCGCCCAACCCGGCCTACCAAAACCCTGCTGTCCCGCCGCCCGGCGTTCCCGGCGCCACCGTGGCAGTTCCGCCGCCGCAGATGCAGGCTATGATGTCGTACCAGGTTCAGCCCGGTAACCCGGCCATGCGGCCCTTCGCT…
Chr01	GmHk_01G000302.1	3268206	3272081	-	ALDH2B7_0	Aldehyde dehydrogenase family 2 member B7, mitochondrial	GO:0016491;GO:0016620;GO:0055114	IPR016160;IPR016161;IPR016162;IPR016163;IPR029510	PF00171	cd07142		Dehydrogenase	C	MASSMRISRLLSRSFLSASSTSLFSRGGSGALGAGLSKFSTAAAIEEPIKPPVKVEHTQLLIDGKFVDAATGKTFPTLDPRTGDVISHVAEGDHEDVDRAVAAARKAFDHGPWPKMTAYERQRILLRAADLFEKHNDELAALETWDNGKPYEQSAQIEIPMLVRLFRYYAGWADKIHGLTVPADGPYHVQTLHEPIGVAGQIIPWNFPLVMFAWKVGPALACGNTIVLKTAEQTPLSALYASKLLHEAGLPPGVLNVISGFGPTAGAAIASHMDIDKLAFTGSTETGKVVLELAARSNLKPVTLELGGKSPFIVCEDADVDEAVELAHFALFFNQGQCCCAGSRTFVHERVYDEFIEKAKARALKRAVGDPFKGGIEQGPQIDSEQFQKILKYIRSGVE…	ATGGCTTCATCAATGAGGATCTCAAGGCTGCTCTCTCGTTCTTTTCTTTCTGCTTCCAGTACTTCTTTGTTCTCTAGAGGTGGAAGTGGTGCTCTTGGTGCAGGGCTCAGTAAATTCAGCACTGCTGCTGCAATTGAAGAACCAATCAAACCACCAGTTAAAGTAGAACACACCCAGCTCTTAATCGATGGAAAATTCGTTGATGCTGCTACTGGCAAAACTTTTCCAACGTTGGACCCCAGGACAGGAGATGTGATTTCTCATGTTGCTGAGGGTGACCATGAAGATGTTGATCGAGCAGTTGCAGCTGCTCGCAAAGCCTTCGACCATGGACCTTGGCCAAAGATGACAGCCTATGAAAGACAAAGGATATTGCTGCGTGCTGCTGATCTGTTTGAA…
Chr01	GmHk_01G000303.1	3281455	3283071	-	-	hypothetical protein	GO:0046983	IPR008906;IPR012337	PF04937;PF05699			transposon protein	S	MLDGVVTFVGEENVVQVITDNATNFKVVRELLMHTWLNLYWTPCVVHCIGLILEDLEKHLKIHEVTIKKGREITTYIYGRTMFISMLKKYTNGRDLVRPGMTKFEIAYLTLACLHEMKTSLMRLFNFKEWKKSKFGTSQEEGKVENSVLDSRFWKNVSICLKVVAPLMVVLRLVDSDQQPAMDFIYVEMDYAKERIKNNFNNVKKRWENQLYRHLHAVAYYLNPQLHFEDDFKKDNGEVKELLFICMMRLVKNVGVRNKINGQLLHFILPKFAIRVLSLTCSSYGCERNWSSFEMVHTKRRNRLHKKKMNDLVYVMYNLKLKSRQTRKIIVLSFEDRGSDDEWLTEERDDIFYEDNLQVDGSNIDLVGESLTDPTLDAFDINNLVLNDNEELEDDCGGG…	ATGTTAGATGGTGTTGTCACATTTGTTGGAGAAGAGAATGTAGTTCAGGTGATTACTGATAATGCTACGAATTTCAAAGTAGTAAGAGAATTATTGATGCATACTTGGTTGAATTTGTATTGGACTCCATGTGTTGTCCATTGCATTGGTCTGATACTTGAGGACTTGGAGAAACATTTAAAGATTCATGAAGTTACTATAAAGAAGGGAAGGGAGATAACCACTTATATATATGGTAGAACAATGTTCATCAGCATGCTCAAGAAGTACACAAATGGGAGGGACTTGGTTAGACCTGGTATGACTAAATTTGAAATTGCTTACTTGACTTTAGCTTGTCTCCATGAAATGAAAACATCTTTGATGAGGTTGTTCAATTTTAAAGAGTGGAAAAAAAGT…
Chr01	GmHk_01G000304.1	3288439	3291263	+	SPDSYN1_0	Spermidine synthase 1	GO:0003824;GO:0006595	IPR029063;IPR030373;IPR030374;IPR030668;IPR035246;IPR037163	PF01564;PF17284	cd02440	TIGR00417	Catalyzes the production of spermidine from putrescine and decarboxylated S-adenosylmethionine (dcSAM), which serves as an aminopropyl donor (By similarity)	E	MAAENVVEFTDLPVKRPREEEEGTNGVSNDAVSALPNDPQYPGISAVIPGWFSEISPMWPGEAHSLKMEKILFQGKSDYQNVMVFQSSTYGKVLVLDGVIQLTERDECAYQEMITHLPLCSIPNPKKVLVIGGGDGGVLREVARHASVEKIDICEIDKMVVDVSKQFFPDIAVGFEDPRVTLTVGDGVAFLKDVPEGTYDAVIVDSSDPIGPAQELFEKPFFASVAKALRPGGVVCTQAESIWLHMHIIEDIVANCRQIFKGSVNYAWTTVPTYPSGMIGFMLCSTEGPLVDFKHPVNPLSENDSQQSRPLKFYNSEIHTAAFCLPSFAKRKIGSKTN	ATGGCTGCGGAAAACGTTGTTGAGTTCACAGACTTACCCGTCAAGAGGCCAAGAGAAGAAGAAGAAGGAACCAATGGCGTCTCCAACGACGCCGTTTCAGCGCTCCCCAATGACCCTCAATACCCTGGCATCTCTGCGGTTATTCCCGGTTGGTTCTCCGAAATCAGCCCAATGTGGCCCGGGGAGGCACATTCCTTGAAGATGGAAAAGATTTTGTTTCAAGGGAAGTCTGACTATCAGAATGTCATGGTCTTCCAGTCATCAACATATGGCAAAGTTCTTGTTTTGGATGGAGTCATTCAGCTTACAGAAAGGGATGAGTGTGCCTACCAAGAGATGATCACTCATCTTCCTCTTTGCTCTATTCCAAATCCCAAAAAGGTTTTGGTTATTGGTGGA…
Chr01	GmHk_01G000305.1	3318358	3324004	+	POT6_0	Potassium transporter 6	GO:0015079;GO:0016020;GO:0071805		PF02705		TIGR00794	Transport of potassium into the cell (By similarity)	P	MRLTNTHAMDLEGGTTRRNSVKRESWRTVVTLAYQSLGVVYGDLSISPLYVFRSTFAEDIKHTESNEEVFGVLSLVFWTITLVPLLKYVFVVLKADDNGEGGTFALYSLLCRHARVSSLPNCQVADEELSEYRKDSRGAAPESSFAARLRSTFEKHKVLQRVLLVLALIGTCMVIGDGIFTPAISVFSAVSGLELSMSKEKHAYVEVPAACIILIGLFALQHYGTHRVGFLFAPVIITWLFCLSTIGIYNIFYWNPHVYKALSPYYAFQLLRKTQKGGWMALGGILLCITGSEAMFADLGHFTQLSIKIAFTSVVYPSLIFAYMGQAAYLSKHHNIEQDYHFGFYESVPEKLRWPVLVIAILAAVVGSQAIITGTFSIIKQCSALSCFPRVKVIHTSSK…	ATGAGACTCACGAATACGCATGCGATGGATCTAGAAGGTGGAACAACTCGTCGAAACTCCGTTAAGAGAGAGTCGTGGAGAACGGTTGTGACTCTGGCGTACCAGAGTTTAGGAGTGGTGTACGGTGATTTGAGCATTTCGCCGTTGTACGTTTTCAGAAGCACGTTTGCGGAGGACATTAAGCACACGGAGAGCAACGAGGAGGTTTTCGGCGTTTTGTCGCTGGTTTTCTGGACCATAACGCTGGTCCCGCTGCTCAAGTACGTTTTCGTGGTGTTAAAAGCTGACGATAACGGCGAAGGAGGCACTTTCGCGCTTTATTCCTTGTTGTGCCGCCACGCCAGAGTGAGTTCTCTCCCGAATTGCCAGGTGGCGGACGAGGAGCTGTCGGAGTACAGA…
Chr01	GmHk_01G000306.1	3334574	3337364	+	TPS9_0	putative alpha,alpha-trehalose-phosphate synthase [UDP-forming] 9	GO:0003824;GO:0005992	IPR003337;IPR006379;IPR023214;IPR036412	PF00982;PF02358	cd01627;cd03788	TIGR00685;TIGR01484	trehalose biosynthetic process	G	MASRSYVNLLDLAGGLLDIPHTPKTIPRIMTVPGVISDLDVCGRYDGDSDVSSSGYRERKILVANMLPLQAKRDIQTGKWCFSLDEDSILLQLKDGFSCDTEVIYVGSLKVEIDAHEQEEVAQKLLEDFNCIPTFLPHDVQKKFYYGFCKQQLWPLFHYMLPMFPDHGDRFDRSLWQAYVSANKIFADKVMEIINPDDDFVWVQDYHLMVLPTFLRKRYNRVKLGFFLHSPFPSSEIYRTLPVRDEILRGLLNSDLIGFHTFDYARHFLSCCKRMLGLDYESKRGHIGLDYFGRTIFIKILPVGIHMGRLESVLNLQSTSAKLKEIREEFKGRKVILGVDDMDIFKGISLKLLAVEQLLQQNQDLKGKVVLVQIVNPARSSGKDVQEAKKETNLIAQRI…	ATGGCATCAAGATCATATGTTAATCTACTAGACTTAGCTGGAGGTTTACTGGATATTCCTCACACGCCAAAAACTATTCCAAGGATTATGACAGTTCCTGGAGTTATTTCTGATCTGGATGTTTGTGGTAGATATGATGGGGATTCTGATGTTAGCTCTTCTGGTTATCGGGAGCGGAAAATCCTTGTGGCAAACATGTTGCCATTGCAGGCCAAAAGAGATATTCAAACTGGTAAATGGTGTTTCAGTTTAGATGAGGATTCTATTCTGTTACAATTAAAAGATGGTTTTTCTTGTGACACTGAGGTGATCTATGTGGGATCCCTCAAGGTTGAAATAGATGCTCATGAGCAGGAAGAAGTTGCTCAGAAATTACTGGAGGACTTTAATTGCATACCT…
Chr01	GmHk_01G000307.1	3353806	3356433	+	-	hypothetical protein		IPR011042				Nhl repeatcontaining protein	S	MAKLHFALSFTLLLLLCNASAAPSTTLPAKIVSGFLSNAVPAFTKWVWSLKAPTKTAIGAKSMMKFESGYTVETVFDGSKLGIEPYAVEVLPNGELLILDSANSNIYRISSSLSLNSRPKLVAGSAEGYSGHVDGRFREARMNHPKGITVDNRGNIYVADIMNMAIRKISDSGKHYLRFLFSGVTTIAGGKWSRGGGHVDGPSEEAKFSNDFDVVYVGSSCSLLVIDRGNQAIREIQLHFDDCAYQYENGFPLGIAVLIGAGFFGYMLALLQRRLGTIVASQDAEGAAMSGISPSPYQKPLNSARPPLIPSEDESDKQEESFFGSIGKLLTNAGASVVEIMGALFPGFRKNPPQSYEFQSPPLFQQPQKQVNAWPVQESFVIPDEDEPPSIDPRTPTPR…	ATGGCAAAGCTCCATTTTGCGTTGAGTTTCACACTTTTGCTTCTACTCTGCAATGCCTCAGCTGCACCATCCACTACTTTACCCGCCAAGATTGTTAGTGGGTTTCTCTCAAATGCCGTGCCTGCATTCACCAAATGGGTGTGGTCACTCAAAGCACCCACCAAAACCGCGATTGGTGCGAAGTCGATGATGAAGTTCGAGAGTGGGTACACTGTGGAAACCGTGTTTGATGGAAGCAAGCTTGGAATTGAGCCTTATGCAGTTGAGGTGTTGCCTAATGGGGAGCTTCTCATTCTGGATTCGGCTAATAGTAACATTTATAGGATTTCGTCCTCGCTTTCTTTGAATAGCAGACCGAAGCTGGTGGCAGGATCTGCTGAAGGATATTCTGGACATGTT…
Chr01	GmHk_01G000308.1	3362788	3375007	+	At1g60070_1	AP-1 complex subunit gamma-2	GO:0005794;GO:0006886;GO:0016192;GO:0030117;GO:0030121	IPR008152;IPR008153;IPR011989;IPR013041;IPR016024;IPR017107	PF01602;PF02883			Adaptor-related protein complex	U	MNPFSSGTRLRDMIRAIRACKTAAEERAVVRKECAAIRAAINENDNDYRHRNLAKLMFIHMLGYPTHFGQMECLKLIASPGFPEKRIGYLGLMLLLDERQEVLMLVTNSLKQDLNHTNQYIVGLALCALGNICSAEMARDLAPEVERLLQFRDPNIRKKAALCSIRIIKKVPDLAENFINPATSLLREKHHGVLITGVQLCTDLCKISTEALEHIRKKCTDGLVRTLKDLANSPYSPEYDIAGITDPFLHIRLLKLLRVLGEGNADASDTMNDILAQVATKTESNKVAGNAILYECVQTIMSIEDNGGLRVLAINILGRFLSNRDNNIRYVALNMLMKAVTADAQAVQRHRATIIECVKDSDASIQKRALELVYVLVNETNVKPLAKELIDYLEVSDLD…	ATGAACCCGTTCTCTTCAGGAACGCGTTTGAGGGACATGATTCGGGCCATACGTGCTTGTAAGACTGCAGCAGAAGAACGAGCTGTTGTAAGAAAAGAATGTGCTGCCATTCGTGCTGCAATAAATGAAAATGATAATGACTATAGGCATCGAAACCTGGCTAAGCTAATGTTCATCCACATGCTTGGTTACCCCACACATTTTGGTCAAATGGAATGCCTCAAGTTGATAGCATCTCCTGGATTTCCAGAGAAGAGAATAGGCTATCTTGGCCTCATGTTGCTTCTTGATGAAAGACAAGAAGTTCTAATGTTGGTCACCAATTCTTTGAAACAAGATCTTAATCACACAAATCAGTATATAGTGGGACTTGCTCTTTGTGCTTTAGGAAACATTTGT…
Chr01	GmHk_01G000308.2	3362788	3375007	+	At1g60070_1	AP-1 complex subunit gamma-2	GO:0005794;GO:0006886;GO:0016192;GO:0030117;GO:0030121	IPR008152;IPR008153;IPR011989;IPR013041;IPR016024;IPR017107	PF01602;PF02883			Adaptor-related protein complex	U	MNPFSSGTRLRDMIRAIRACKTAAEERAVVRKECAAIRAAINENDNDYRHRNLAKLMFIHMLGYPTHFGQMECLKLIASPGFPEKRIGYLGLMLLLDERQEVLMLVTNSLKQDLNHTNQYIVGLALCALGNICSAEMARDLAPEVERLLQFRDPNIRKKAALCSIRIIKKVPDLAENFINPATSLLREKHHGVLITGVQLCTDLCKISTEALEHIRKKCTDGLVRTLKDLANSPYSPEYDIAGITDPFLHIRLLKLLRVLGEGNADASDTMNDILAQVATKTESNKVAGNAILYECVQTIMSIEDNGGLRVLAINILGRFLSNRDNNIRYVALNMLMKAVTADAQAVQRHRATIIECVKVFPREDLAGNFVKDEVWYALIVVITNASELHGYTVRALYR…	ATGAACCCGTTCTCTTCAGGAACGCGTTTGAGGGACATGATTCGGGCCATACGTGCTTGTAAGACTGCAGCAGAAGAACGAGCTGTTGTAAGAAAAGAATGTGCTGCCATTCGTGCTGCAATAAATGAAAATGATAATGACTATAGGCATCGAAACCTGGCTAAGCTAATGTTCATCCACATGCTTGGTTACCCCACACATTTTGGTCAAATGGAATGCCTCAAGTTGATAGCATCTCCTGGATTTCCAGAGAAGAGAATAGGCTATCTTGGCCTCATGTTGCTTCTTGATGAAAGACAAGAAGTTCTAATGTTGGTCACCAATTCTTTGAAACAAGATCTTAATCACACAAATCAGTATATAGTGGGACTTGCTCTTTGTGCTTTAGGAAACATTTGT…
Chr01	GmHk_01G000309.1	3380676	3382572	-	ATL46_0	RING-H2 finger protein ATL46		IPR001841;IPR013083	PF13639	cd16454		zinc ion binding	O	MYRVHSKILKSNGAITNPPIFARYSSSSSSPSVPYVSNYQKQTAPSPTSSSGNRISPAILVIIVILAVVFFILGFLHLLVRFLIKQRSSSNSSISQSNRYPDMSESDAYQRQLQQLFHLHDSGLDQAFIDALPVFFYKEIIGLKEPFDCAVCLCEFLEQDKLRLLPMCNHAFHIECIDTWLLSNSTCPLCRGTLYSPGFAFENSVFDFESQLKEDGVSGSGGVGSVNKTTESYIVNGKRVFSVRLGNFRSTNNQDVVVERGEGESSSVNLDVRRCYSMGSFQYIVADSDLRVALGPSSGSMRQLLKGRAATNGSSFLDGDAVEGKKINIARKGESFSVSKIWQCSRKDKLTGSSDAHFHNSTVTSTLPWMNKVRVTELQFLSRSREMKVKSNWGCFLDA…	ATGTATAGGGTTCACTCTAAAATCCTTAAAAGCAATGGTGCTATCACCAACCCCCCTATTTTTGCTCGATATTCTTCTTCTTCTTCTTCACCCTCAGTGCCTTATGTTTCTAACTACCAGAAACAAACAGCTCCATCCCCAACTTCTTCATCTGGGAATAGAATAAGCCCTGCAATTCTTGTCATCATAGTAATTTTAGCAGTGGTGTTTTTCATCTTGGGTTTCCTTCACTTGCTTGTTAGATTTCTCATAAAGCAAAGGTCTTCCTCCAATTCATCAATTTCCCAATCAAATAGATACCCTGACATGTCTGAATCAGATGCTTACCAGAGGCAGTTACAGCAGCTCTTCCATCTTCATGACTCAGGTCTGGATCAGGCTTTCATAGATGCTCTCCCA…
Chr01	GmHk_01G000310.1	3385953	3388170	-	-	hypothetical protein						-	-	METKDFVGQTIRRRDGNTKRTNHPFSSFLGLILEGSASRDQHGLISSRKLTHVVIASGIRGPDPPQSRKDKEEEDNVGLDNLPLGLSFSLHPPFLFFIQTLVFFFLNTFFYILCTRIIIPLTLQVLPTLIKSD	ATGGAGACAAAGGATTTTGTGGGGCAAACCATACGAAGAAGAGATGGCAACACCAAGAGAACTAATCATCCATTCTCATCTTTTTTGGGCTTGATTTTGGAGGGATCAGCCTCTCGTGATCAACATGGCTTGATCTCCTCAAGAAAGCTAACACATGTGGTGATAGCTTCTGGAATTCGAGGTCCAGATCCTCCACAGAGCAGAAAAGATAAAGAAGAAGAAGATAATGTTGGGCTTGATAATCTTCCTCTTGGGCTTTCCTTCTCCTTGCACCCCCCTTTTCTCTTCTTTATTCAGACTCTGGTCTTCTTCTTCCTCAACACCTTCTTCTACATTCTCTGTACTCGTATCATTATCCCTTTGACACTTCAAGTACTACCAACATTGATTAAATCAGAC…
Chr01	GmHk_01G000311.1	3393481	3399619	+	N_0	TMV resistance protein N	GO:0005515;GO:0007165;GO:0043531	IPR002182;IPR011713;IPR027417;IPR032675;IPR035897;IPR036390	PF00931;PF01582;PF07725				R	MANQQIINHASSSSCVASLKRYDVFLSFRGEDTRKNITSHLYHALFQAKLEIYIDYRLQKGDEISQALIEAIEESQVSVIIFSEKYATSKWCLDEITKIIECKEGQGQVVIPVFYKIDPSHIRKQQGSFKQAFVEHEQDLKITTDRVQKWREALTKAANLAGWDFQTYRTEAEFIKDIVKDVLLKLNLIYPIELKGLIGIEGNYTRIESLLKIDSRKVRVIGIWGMGGIGKTTLATALYAKLFSRFEGHCFLGNVREQAEKQGLDFLRTKLFSELLPGENHLHENMPKVEYHFITRRLKRKKVFLVLDDVASSEQLEDLIDDFNCFGPGSRVIVTTRDKHIFSQVDEIYEVKELNDLDSLQLFCLNAFREKHPKNGFEELSESVIAYCKGNPLALKVLG…	ATGGCTAATCAGCAAATAATCAACCATGCTTCTTCTTCTTCTTGTGTGGCCTCTCTCAAAAGATATGATGTTTTTCTTAGCTTTCGAGGAGAGGACACTCGCAAAAACATCACAAGCCATCTCTACCATGCTCTCTTCCAAGCCAAACTGGAAATCTACATAGACTACAGGCTTCAAAAGGGTGATGAGATCTCGCAAGCTCTCATTGAAGCCATTGAAGAGTCACAGGTATCCGTCATCATCTTCTCAGAAAAGTATGCTACCTCCAAATGGTGCTTGGATGAAATCACCAAGATTATAGAATGCAAGGAGGGTCAAGGACAAGTTGTTATACCCGTCTTCTATAAAATAGATCCATCACATATAAGGAAGCAACAAGGGTCTTTCAAGCAAGCGTTT…
Chr01	GmHk_01G000312.1	3403626	3413620	+	THRRS_0	Threonine--tRNA ligase, mitochondrial 1	GO:0000166;GO:0004812;GO:0004829;GO:0005524;GO:0005737;GO:0006418;GO:0006435	IPR002320;IPR004095;IPR004154;IPR006195;IPR012675;IPR012676;IPR018163;IPR033728;IPR036621	PF00587;PF02824;PF03129	cd00771;cd00860;cd01667	TIGR00418	threonine-tRNA ligase activity	J	MLCSLIRIRRHAPFHHTLRSLLPINRFSSSSSSSASAAAAAAMVAHAKDEAYLSAAIPKRVRLFETIQAEQRTQRLSLSPDPIKVTLPDGNVKDAKKWLSTPLDVAREISKNLANSALIAKVNGVLWDMTRPLEDDCQLQIFKFDDDEGRDTFWHSSAHILGQSLETEYGCKLCIGPCTTRGEGFYYDAFYGDLGLNDDHFKQIEAGALKAVAEKQPFERIEVTRDQALEMFSDNKSRLSMICLPTKLSQYTDVVPWWICVVGPIYLIHPLSKQLRASSAYWRGDKDRESLQRVYGISYPDQKSLKEYLHRLEEAKKYDHRILGVKQELILHHEWSPGSWFFLPHGARIYNKLMDFIRNQYRDRGYQEVISPNVFNMDLWVQSGHAANYREDMFILEVD…	ATGCTATGCTCTCTAATCCGTATCCGCCGTCACGCTCCTTTCCACCACACTCTCCGCTCTCTCTTGCCGATTAACCGTTTCTCCTCCTCCTCCTCCTCCTCCGCCTCCGCCGCCGCCGCCGCCGCCATGGTTGCTCACGCGAAGGACGAGGCGTACCTTAGCGCGGCGATTCCGAAGCGCGTCCGTCTCTTCGAGACCATCCAGGCGGAGCAGCGCACGCAGCGCCTCTCGCTTTCGCCGGATCCTATCAAGGTCACTCTCCCCGACGGCAACGTCAAGGACGCGAAGAAGTGGCTCTCGACGCCGCTCGACGTGGCGCGCGAAATCTCGAAGAATTTGGCCAACAGCGCGCTCATCGCGAAGGTCAATGGCGTGCTCTGGGACATGACGCGCCCTCTC…
Chr01	GmHk_01G000313.1	3407033	3407272	-	-	hypothetical protein							R	MATHPYHYTDPLNTIKMSYSFTLRSSSVAASNWCTFMCANQVQDLTFYIYKIKKPWIGSINQTVSSLHDLTGSPPVLRF	ATGGCCACACACCCCTACCACTACACAGATCCATTAAATACCATAAAGATGAGTTACAGCTTCACTCTAAGAAGTTCAAGTGTAGCAGCAAGTAACTGGTGCACTTTCATGTGTGCAAACCAAGTTCAAGACTTAACATTTTACATTTACAAAATAAAGAAGCCATGGATTGGTTCAATTAACCAAACTGTGAGCAGTCTGCATGATTTGACTGGTTCACCACCAGTTCTGCGTTTTTGA
Chr01	GmHk_01G000314.1	3416738	3418751	-	RSS3_0	Protein RICE SALT SENSITIVE 3		IPR025610	PF14215			expressed protein	S	MEEHLTPLAVTHLLQHTLRSLCIHENSQWVYAVFWRILPRNYPPPKWEGQGAYDRSRGNRRNWILVWEDGFCNFAASAAPEVNSGDCSTPPVYGNCEFQPYQGLQPELFFKMSHEIYNYGEGLIGKVAADHSHKWINKEPNDQEINFLSAWHNSADSHPRTWEAQFLSGIKTIALIAVREGVVQLGAVHKVIEDLSYVVLLRKKFSYIESIPGVLLPHPSSSAYPYKIEGGGYGAPEQWHYQGGNNHHHLASPQQTELYDHHGHFNLPLKITPSMSSLEALLSKLPSVVPPTTTQQQPLLPSNSQQQQRRPLEFIMGMQKVAKEELEQEEVYRPELDIGESSSSLPGGGYHQHQHQHHFHQDQNNNVTRSGANNGF	ATGGAAGAACATCTCACTCCATTGGCTGTTACCCATCTCCTTCAACACACTCTCAGAAGTTTGTGCATCCATGAAAATTCTCAATGGGTCTACGCAGTCTTCTGGAGGATCTTGCCTAGAAACTACCCTCCACCCAAGTGGGAAGGACAAGGGGCTTATGATAGATCAAGAGGAAACAGAAGGAATTGGATATTGGTGTGGGAAGATGGTTTCTGCAATTTTGCTGCATCAGCAGCACCTGAAGTTAACTCTGGTGATTGTTCTACCCCACCTGTTTATGGGAACTGTGAATTTCAGCCCTACCAAGGGCTGCAACCGGAGCTCTTCTTCAAGATGTCACATGAGATCTATAACTATGGAGAAGGGTTGATAGGAAAAGTGGCTGCAGATCACAGCCAC…
Chr01	GmHk_01G000315.1	3431665	3431856	+	-	hypothetical protein							R	MECNGKQDGQMHEKVCDLVVFPMEKTSKASREASDCKSPSWPRKALPTHYSSLPRPKGKKASV	ATGGAGTGTAATGGGAAACAAGATGGTCAAATGCATGAAAAAGTCTGCGACTTGGTAGTTTTTCCAATGGAGAAAACCTCCAAAGCATCACGTGAAGCATCGGATTGCAAGTCACCATCTTGGCCAAGAAAAGCTTTGCCTACCCACTATAGTAGTCTTCCACGACCCAAAGGAAAAAAGGCAAGTGTATGA
Chr01	GmHk_01G000316.1	3446965	3450410	+	N_1	TMV resistance protein N	GO:0005515;GO:0007165;GO:0043531	IPR002182;IPR003593;IPR011713;IPR027417;IPR032675;IPR035897	PF00931;PF01582;PF07725			leucine Rich Repeat	S	MAGSSSSAAGSLLPVIRHHVFLNFRGEDTRDNFIRHIYEQLQRKKIETYIDYRLSRGQEISPALHRAIEESMIYVVVFSENYASSTWCLDELTKILDCKKRYGRVVIPVFYKVDPSIVRNQRETYAEAFVKHEHRFQDKFDKVHGWKAALTEAAGLSGWDSQVTRPEATLVAEIVKDILEKLDSSSISDHQGIVGIENHITRIQSLMNLESPDIRIIGIWGLGGIGKTTIARKIYHKLAPHFGSSSLVLNVQEEIQRHGIHHSRSKYISELLGKEKSFSNERLKQKKVLLILDDVNDSGQLKDLIGGRGDFGQGSRIILTSRGMQVLKNAEADEIYEVKEMNFQNSLNLFSIHAFHQNHPRETYMDLSIKVLHYAKGIPLALQSLGSLLYDRTKEAWES…	ATGGCGGGGAGTTCTTCATCAGCTGCTGGGTCTCTTCTTCCTGTAATTAGGCATCATGTGTTCCTCAACTTCAGAGGGGAAGACACCCGTGACAACTTCATTAGACACATTTATGAACAACTACAGAGGAAAAAGATTGAAACATATATAGATTACAGACTATCCAGAGGCCAAGAGATTTCACCTGCACTCCACAGAGCAATAGAAGAATCTATGATTTATGTTGTCGTTTTCTCTGAGAACTATGCATCTTCCACATGGTGTTTGGATGAACTCACAAAGATACTCGATTGCAAGAAGAGATATGGAAGGGTTGTGATCCCAGTTTTCTATAAGGTGGATCCATCAATTGTTAGGAATCAGAGAGAGACGTATGCAGAAGCATTCGTTAAGCATGAA…
Chr01	GmHk_01G000317.1	3496080	3532148	+	At5g40240_0	WAT1-related protein At5g40240	GO:0016020;GO:0016021		PF00892			auxin-induced protein	S	MQGAGVTFVMVVVQVLSVGLNTMIKASLSKGMSIFVFVAYSNLFAFCFLLLATTIRHRNSAPTPINNSILFRIFVLGLLSVSIQTLIYTGLGYSSPTLTSTMEDLIPAYTFIIAIISRMEKLDLKLQSCQAKSIGTVISIAGALIMTLYKGLPMTSDVMPNNVFLSSQQSKWLLGGFLLASRLLFSVALSPHIIKIVVFLCIMHTWTIKDYPEELMLITISTSLSVILSFIVAFIAEENPKAWTLKLDMELVCILYSAIFVMSTRNVVNVWACRKKGPVYVAMFSPLGIVIALAMGIVFLGDALYLGSLIGAAIIAIGFYAVTWGQAQEETMGYEKHGTCSIISSPSSETPLLLNKSKDSKKERERGEVNEMQGAVTAAMVVCLFLTVGLNTLIKANMS…	ATGCAGGGCGCAGGGGTAACCTTTGTAATGGTTGTGGTTCAGGTCTTGAGTGTGGGTTTGAACACTATGATCAAAGCATCATTGTCCAAAGGGATGAGCATTTTTGTTTTTGTTGCGTATTCAAACCTTTTCGCATTCTGTTTTCTGCTTCTAGCAACCACAATTCGTCACAGAAACAGTGCTCCCACACCGATCAATAATTCCATACTCTTCAGAATTTTTGTTCTTGGCTTGCTCAGCGTTTCCATACAGACGCTTATTTATACTGGACTTGGGTATAGCTCTCCCACTCTGACTTCAACCATGGAAGATCTTATTCCAGCTTATACTTTCATAATTGCCATTATTTCCAGGATGGAAAAGTTGGATCTAAAACTACAAAGCTGCCAAGCAAAATCC…
Chr01	GmHk_01G000318.1	3536004	3537657	-	MLP423_0	MLP-like protein 423	GO:0006952	IPR023393	PF00407	cd07816		MLP-like protein	S	MATRGKLEVDVDLKSNADKYWKTLRNSTEIFPKAFPNDYKSIEVLEGDGKSPGSIRHISYGEGSPLVKSSFEKIEAVDEEKKVVSYTIIDGELLQHYKTFKGDISVTPVGDGCEVKWSAVYEKVSHDVSDPTLVKDFAVKNFLEVDAYVQANA	ATGGCTACTCGAGGAAAGCTTGAGGTTGACGTTGATCTCAAGTCTAACGCAGACAAGTACTGGAAAACCCTTAGGAACTCCACTGAAATATTCCCCAAGGCCTTCCCCAATGATTACAAAAGCATTGAGGTTCTTGAGGGTGATGGCAAATCACCTGGTTCTATCCGCCACATAAGTTATGGTGAAGGTTCACCACTTGTGAAGTCATCCTTTGAGAAGATTGAGGCTGTTGATGAAGAAAAGAAGGTAGTGTCGTACACTATCATTGATGGAGAACTCCTCCAGCACTACAAAACATTCAAGGGAGACATTTCTGTGACTCCAGTTGGCGATGGATGCGAGGTGAAGTGGAGTGCTGTGTACGAAAAGGTTAGCCATGATGTTTCTGATCCAACCCTC…
Chr01	GmHk_01G000319.1	3547724	3551761	+	PBL28_3	putative serine/threonine-protein kinase PBL28	GO:0004672;GO:0005524;GO:0006468	IPR008271;IPR011009;IPR017441	PF00069	cd14066		Serine Threonine protein kinase	T	MPFGLVSLSAWNKRRRSKSQDHTDPWVYKPAQLWQLEDQMPRPTKRLHGSSVYTLKEMEEATCSFSDENLLGKGGFGKVYRGTLRSGEVVAIKKMELPAIKAAEGEREFRVEVDILSRLDHPNLVSLIGYCADGKHRFLVYEYMRRGNLQDHLNGIGERNMDWPRRLQVALGAAKGLAYLHSSSDVGIPIVHRDFKSTNILLDDNFEAKISDFGLAKLMPEGQETHVTARVLGTFGYFDPEYTSTGKLTLQSDVYAFGVVLLELLTGRRAVDLNQGPNDQNLVLQVRHILNDRKKLRKVIDPEMARNSYTIQSIVMFANLASRCVRTESNERPSMAECIKELLMIIYTNSKGLGMVMHSLRMI	ATGCCATTTGGTTTGGTCTCACTCTCAGCCTGGAACAAGCGTCGTAGAAGCAAATCACAAGATCATACAGATCCCTGGGTTTACAAACCTGCACAGCTTTGGCAACTTGAAGATCAAATGCCACGACCTACAAAAAGGCTACATGGATCATCTGTTTACACACTCAAGGAGATGGAGGAGGCAACATGTTCATTCAGTGATGAGAATCTGCTTGGTAAAGGAGGATTTGGCAAAGTCTACCGGGGAACTTTGCGGTCAGGAGAGGTTGTAGCAATCAAGAAAATGGAGTTGCCAGCAATTAAAGCAGCAGAGGGGGAACGTGAGTTTCGTGTTGAAGTTGACATCTTGAGCAGACTTGACCACCCAAATCTTGTTTCTTTGATAGGCTACTGTGCTGAT…
Chr01	GmHk_01G000319.2	3547724	3551761	+	PBL28_3	putative serine/threonine-protein kinase PBL28	GO:0004672;GO:0005524;GO:0006468	IPR008271;IPR011009;IPR017441	PF00069	cd14066		Serine Threonine protein kinase	T	MPFGLVSLSAWNKRRRSKSQDHTDPWVYKPAQLWQLEDQMPRPTKRLHGSSVYTLKEMEEATCSFSDENLLGKGGFGKVYRGTLRSGEVVAIKKMELPAIKAAEGEREFRVEVDILSRLDHPNLVSLIGYCADGKHRFLVYEYMRRGNLQDHLNGIGERNMDWPRRLQVALGAAKGLAYLHSSSDVGIPIVHRDFKSTNILLDDNFEAKISDFGLAKLMPEGQETHVTARVLGTFGYFDPEYTSTGKLTLQSDVYAFGVVLLELLTGRRAVDLNQGPNDQNLVLQVRHILNDRKKLRKVIDPEMARNSYTIQSIVMFANLASRCVRTESNERPSMAECIKELLMIIYTNSKGLGMVMHSLRMI	ATGCCATTTGGTTTGGTCTCACTCTCAGCCTGGAACAAGCGTCGTAGAAGCAAATCACAAGATCATACAGATCCCTGGGTTTACAAACCTGCACAGCTTTGGCAACTTGAAGATCAAATGCCACGACCTACAAAAAGGCTACATGGATCATCTGTTTACACACTCAAGGAGATGGAGGAGGCAACATGTTCATTCAGTGATGAGAATCTGCTTGGTAAAGGAGGATTTGGCAAAGTCTACCGGGGAACTTTGCGGTCAGGAGAGGTTGTAGCAATCAAGAAAATGGAGTTGCCAGCAATTAAAGCAGCAGAGGGGGAACGTGAGTTTCGTGTTGAAGTTGACATCTTGAGCAGACTTGACCACCCAAATCTTGTTTCTTTGATAGGCTACTGTGCTGAT…
Chr01	GmHk_01G000319.3	3546446	3551761	+	PBL28_3	putative serine/threonine-protein kinase PBL28	GO:0004672;GO:0005524;GO:0006468	IPR008271;IPR011009;IPR017441	PF00069	cd14066		Serine Threonine protein kinase	T	MYACQFHSSLGPKSKSHFSRELRKKYSEEASAENCGVYKPAQLWQLEDQMPRPTKRLHGSSVYTLKEMEEATCSFSDENLLGKGGFGKVYRGTLRSGEVVAIKKMELPAIKAAEGEREFRVEVDILSRLDHPNLVSLIGYCADGKHRFLVYEYMRRGNLQDHLNGIGERNMDWPRRLQVALGAAKGLAYLHSSSDVGIPIVHRDFKSTNILLDDNFEAKISDFGLAKLMPEGQETHVTARVLGTFGYFDPEYTSTGKLTLQSDVYAFGVVLLELLTGRRAVDLNQGPNDQNLVLQVRHILNDRKKLRKVIDPEMARNSYTIQSIVMFANLASRCVRTESNERPSMAECIKELLMIIYTNSKGLGMVMHSLRMI	ATGTATGCTTGTCAATTCCATTCTTCCCTGGGTCCAAAATCAAAATCCCACTTCTCCCGTGAACTCCGAAAGAAATATAGTGAAGAAGCAAGTGCCGAAAATTGTGGGGTTTACAAACCTGCACAGCTTTGGCAACTTGAAGATCAAATGCCACGACCTACAAAAAGGCTACATGGATCATCTGTTTACACACTCAAGGAGATGGAGGAGGCAACATGTTCATTCAGTGATGAGAATCTGCTTGGTAAAGGAGGATTTGGCAAAGTCTACCGGGGAACTTTGCGGTCAGGAGAGGTTGTAGCAATCAAGAAAATGGAGTTGCCAGCAATTAAAGCAGCAGAGGGGGAACGTGAGTTTCGTGTTGAAGTTGACATCTTGAGCAGACTTGACCACCCAAAT…
Chr01	GmHk_01G000319.4	3546446	3551761	+	PBL28_3	putative serine/threonine-protein kinase PBL28	GO:0004672;GO:0005524;GO:0006468	IPR008271;IPR011009;IPR017441	PF00069	cd14066		Serine Threonine protein kinase	T	MYACQFHSSLGPKSKSHFSRELRKKYSEEASAENCGVYKPAQLWQLEDQMPRPTKRLHGSSVYTLKEMEEATCSFSDENLLGKGGFGKVYRGTLRSGEVVAIKKMELPAIKAAEGEREFRVEVDILSRLDHPNLVSLIGYCADGKHRFLVYEYMRRGNLQDHLNGIGERNMDWPRRLQVALGAAKGLAYLHSSSDVGIPIVHRDFKSTNILLDDNFEAKISDFGLAKLMPEGQETHVTARVLGTFGYFDPEYTSTGKLTLQSDVYAFGVVLLELLTGRRAVDLNQGPNDQNLVLQVRHILNDRKKLRKVIDPEMARNSYTIQSIVMFANLASRCVRTESNERPSMAECIKELLMIIYTNSKGLGMVMHSLRMI	ATGTATGCTTGTCAATTCCATTCTTCCCTGGGTCCAAAATCAAAATCCCACTTCTCCCGTGAACTCCGAAAGAAATATAGTGAAGAAGCAAGTGCCGAAAATTGTGGGGTTTACAAACCTGCACAGCTTTGGCAACTTGAAGATCAAATGCCACGACCTACAAAAAGGCTACATGGATCATCTGTTTACACACTCAAGGAGATGGAGGAGGCAACATGTTCATTCAGTGATGAGAATCTGCTTGGTAAAGGAGGATTTGGCAAAGTCTACCGGGGAACTTTGCGGTCAGGAGAGGTTGTAGCAATCAAGAAAATGGAGTTGCCAGCAATTAAAGCAGCAGAGGGGGAACGTGAGTTTCGTGTTGAAGTTGACATCTTGAGCAGACTTGACCACCCAAAT…
Chr01	GmHk_01G000320.1	3552666	3555270	-	-	hypothetical protein		IPR000182;IPR016181	PF00583	cd04301		Acetyltransferase (GNAT) family	S	MAAAASSTLFSLSFPFHPQIQTLSFPFSPTKPSLSPKLFSTFKLSSSHSSLTVSDDPFHTGRFLSNDELRRLRLLETFLYRPDLPSGSLSVRVMRPHETDPTVLLLAESFAESMLLPQPYVKFLAFLVKQYLLDRRSLMPHTATLVAFYTQTTAAGADQEEEEACLAGMVELCFDKRGANASIPSPAPPRDKPYICNMAVQKSLRRRGIGWHLLKASEELISQMSSSREVYLHCRIIDEAPFNMYTKADYKIVKTDSIFVLLTLQRRKHLMCKKLPLLSTPPETDLSVSDE	ATGGCTGCAGCAGCATCATCAACACTATTTTCCCTCTCCTTCCCCTTCCACCCTCAAATCCAAACCCTCTCCTTCCCCTTCTCCCCCACCAAACCCTCCCTCTCCCCCAAACTCTTCTCCACTTTCAAACTCTCCTCTTCCCACTCCTCCCTCACTGTTTCCGACGACCCCTTCCACACGGGCCGCTTCCTCTCCAACGACGAGCTCCGCCGCCTCCGCCTCCTCGAGACATTCCTCTACCGCCCTGACCTCCCCTCCGGCTCCCTCTCCGTCCGCGTCATGCGGCCCCACGAGACCGACCCCACCGTCCTCCTCCTCGCCGAGTCCTTCGCCGAGTCCATGCTCCTCCCCCAACCCTACGTCAAATTCCTCGCCTTCCTTGTCAAACAGTACCTCCTC…
Chr01	GmHk_01G000321.1	3573273	3596100	-	AXY4_3	Protein ALTERED XYLOGLUCAN 4		IPR025846;IPR026057	PF13839;PF14416				R	MQDFSKRFSKKLLPSASYALPPIVLLCFSLYFYCLSFTSSPANEPPHSLSITNHSSLELHSISITNHSSLSSSPPPPVYEKPCDYTNGRWVRTKRGPLYNATNCPNMKEKQNCIANGRPDLGYLNWRWKPSECHLPRNHLQSLLCMLNTVTEPNGLSNEGSNQWHFPSHNAMLSFYWSPFLVHGVDRKIRRPPHYNKIYLDRVNIRWEKDIDQMDIIVLSLGHWFLVPSVIYWGDKVIGCLNRPVSNFSNCTTEIGFYGPIRRALRTSLNSIIKRKVKKGNGIDVIVRTYSPSHFEGAWDKGGICSKTKPYREGERQLEGEDAEIRRIQLEELERAKEKAKKFRRFRLEVLDVTKLALLRPDGHPGAYRNPFPFANGVPKSVQNDCVHWCLPGPIDTWN…	ATGCAAGACTTCAGTAAGAGATTTAGCAAGAAGCTTCTTCCTTCTGCTTCCTATGCTCTTCCACCCATTGTGCTGCTTTGCTTTTCCCTTTACTTTTACTGTCTCTCCTTTACTTCATCTCCAGCAAATGAGCCTCCTCATTCCCTCTCCATCACCAACCACTCTTCTCTTGAGCTTCATTCCATCTCCATCACTAATCATTCTTCTCTTTCCTCTTCTCCCCCTCCACCAGTTTATGAGAAGCCATGTGACTACACCAATGGCAGATGGGTCCGTACCAAAAGAGGTCCTCTATATAATGCTACTAACTGTCCCAACATGAAAGAAAAACAGAATTGTATAGCCAATGGTAGGCCTGATTTGGGGTACCTTAATTGGAGATGGAAACCAAGTGAATGC…
Chr01	GmHk_01G000321.2	3573273	3597991	-	AXY4_3	Protein ALTERED XYLOGLUCAN 4		IPR025846;IPR026057	PF13839;PF14416				R	MGGTNPFKDKLVSFTKRIVPSTLYALLPIVLLCTYFDLLSLTPHSTTTTYHLSLSPPPPPPPSSSSSFSTEKNKTYQNPCDYSNGDWVRDTRGPLYNVTSCGTIKESEKCVSNGRPDSGYLYWRWQPSECNLPRFEPLTFLQLVQNKHIAFVGDSLARNQLESLLCMLSTVSSPNLVYQSANDNKFRRWHFPSHNANFSLYWSPFLVQGVERSNEGPYYNTMYLDHVNERWARDLDWFDMVVVSFGHWFLLPSVYYENGSVIGSLNCHDLNHTKMDFYVPLRKVLRTTLSSIIERKRGKGNNGVDVIVKTFSPAHFEGDWNKAGTCSKTKPYKKEEKELEGMDAEIRKIEIEEVENAKAKASELGGFRFEVLDVTKLALLRPDGHPGAYRNPFPFANGV…	ATGGGAGGCACAAATCCTTTCAAAGACAAATTGGTTTCTTTCACAAAGAGAATTGTTCCTTCCACTCTCTATGCTCTGCTTCCCATTGTTCTGCTTTGTACATACTTCGACCTTCTCTCCCTCACTCCACATTCCACCACCACCACCTACCACCTTTCTCTTTCTCCTCCTCCACCTCCTCCACCTTCATCATCTTCTTCTTTTTCTACAGAAAAGAACAAAACTTACCAAAACCCATGTGACTACTCTAATGGTGATTGGGTACGTGACACAAGAGGCCCTTTATACAATGTAACTAGTTGTGGTACAATCAAAGAGAGTGAGAAATGCGTATCCAATGGAAGGCCTGACTCAGGCTATCTATATTGGAGATGGCAACCCAGTGAGTGCAATCTTCCA…
Chr01	GmHk_01G000321.3	3559919	3573270	-	AXY4_3	Protein ALTERED XYLOGLUCAN 4		IPR025846;IPR026057	PF13839;PF14416			Pfam:DUF231	S	MRITDQFKDNKSLALTKRLIPWTICVLLPIALIHSFFYPLPFSPSPKTDLPHSTNNNITYRSSLSASPPSSAEKGKTNETKCDYCNGEWVSDSGSPLYNDTTCGTIKEGRNCITHGRPESGYLHWRWKPTQCNLPRFEPQTFLQHIKNKHVAFVGDSMARNQLESLLCMLATASTPNLVYNHKTGKDNQFSRWHFPSHNASVSLYWSPFLVHGVEKSSTNPNNNLYLDHVDERWANDMDQMDLIVLSFGHWLLLPAVYHEGDSVLGCHYCPGLNHTEIGFYIVLRKALRTTLNSIIERRGDKGNGIDVIVTTFSPHHFEGEWDKAGACPKTKPYRNEEKQLEGMDAEMRKIEIEEVEYAKAKAKRRLRLEALDVTKLALLRPDGHPGPYMNPFPFVNGN…	ATGCGAATTACTGACCAATTCAAAGACAACAAATCCCTCGCCCTCACCAAGAGACTTATTCCATGGACCATTTGTGTTCTGCTTCCTATAGCTCTGATTCATTCATTCTTTTACCCTTTACCCTTTTCTCCATCTCCTAAAACTGATCTTCCACATTCCACCAATAATAACATCACGTACCGTTCTTCTCTTTCAGCTTCTCCTCCTTCTTCTGCAGAAAAGGGAAAAACTAACGAGACCAAATGTGACTATTGCAATGGTGAATGGGTGAGTGACAGTGGAAGCCCTTTGTACAATGATACAACATGTGGAACAATCAAAGAGGGCAGAAATTGCATCACACATGGCAGGCCTGAATCTGGCTATCTTCACTGGAGATGGAAACCAACTCAATGCAAT…
Chr01	GmHk_01G000321.4	3559919	3573270	-	AXY4_3	Protein ALTERED XYLOGLUCAN 4		IPR025846;IPR026057	PF13839;PF14416			Pfam:DUF231	S	MRITDQFKDNKSLALTKRLIPWTICVLLPIALIHSFFYPLPFSPSPKTDLPHSTNNNITYRSSLSASPPSSAEKGKTNETKCDYCNGEWVSDSGSPLYNDTTCGTIKEGRNCITHGRPESGYLHWRWKPTQCNLPRFEPQTFLQHIKNKHVAFVGDSMARNQLESLLCMLATASTPNLVYNHKTGKDNQFSRWHFPSHNASVSLYWSPFLVHGVEKSSTNPNNNLYLDHVDERWANDMDQMDLIVLSFGHWLLLPAVYHEGDSVLGCHYCPGLNHTEIGFYIVLRKALRTTLNSIIERRGDKGNGIDVIVTTFSPHHFEGEWDKAGACPKTKPYRNEEKQLEGMDAEMRKIEIEEVEYAKAKAKRRLRLEALDVTKLALLRPDGHPGPYMNPFPFVNGN…	ATGCGAATTACTGACCAATTCAAAGACAACAAATCCCTCGCCCTCACCAAGAGACTTATTCCATGGACCATTTGTGTTCTGCTTCCTATAGCTCTGATTCATTCATTCTTTTACCCTTTACCCTTTTCTCCATCTCCTAAAACTGATCTTCCACATTCCACCAATAATAACATCACGTACCGTTCTTCTCTTTCAGCTTCTCCTCCTTCTTCTGCAGAAAAGGGAAAAACTAACGAGACCAAATGTGACTATTGCAATGGTGAATGGGTGAGTGACAGTGGAAGCCCTTTGTACAATGATACAACATGTGGAACAATCAAAGAGGGCAGAAATTGCATCACACATGGCAGGCCTGAATCTGGCTATCTTCACTGGAGATGGAAACCAACTCAATGCAAT…
Chr01	GmHk_01G000322.1	3607903	3612221	+	NAT7_0	Nucleobase-ascorbate transporter 7	GO:0016020;GO:0022857;GO:0055085		PF00860			permease	F	MDIYETFCFCFFPHSVLLNQEIILHLLHCITLLKGSSSMAGAAPPPKPEELQPHPVKDQLPNVSYCITSPPPWPEAILLGFQHYLVMLGTTVLIPTTLVTQMGGGNEEKAKMIQTLLFVAGINTFFQTLFGTRLPAVIGGSYTFVPTTISIILAGRYSDIVNPQERFERIMRGTQGALIVASTLQIVVGFSGLWRNVVRFLSPLSAVPLVALSGFGLYELGFPVLAKCVEIGLPEIVLLIVFSQYIPHVMKAEKPIFDRFAVIFSVTIVWIYAHLLTVGGAYKNVPQTTQNTCRTDRAGIISGAPWIRIPYPFQWGAPTFDAGEAFATMAASFVALVESTGAFIAVSRYASATPLPPSVLSRGVGWQGVGILLSGIFGTGNGSSVSVENAGLLALTRVG…	ATGGATATTTATGAAACATTTTGCTTTTGCTTTTTTCCACATTCTGTTTTGTTGAACCAAGAAATCATCCTGCATTTGCTGCACTGCATAACGTTACTGAAAGGTTCAAGTAGCATGGCAGGAGCTGCACCACCACCCAAGCCAGAAGAGCTTCAGCCACACCCAGTGAAAGATCAACTTCCAAATGTTTCATACTGCATCACAAGTCCTCCTCCATGGCCGGAGGCAATACTACTTGGTTTCCAACATTACTTGGTGATGCTTGGCACAACTGTTCTTATACCAACCACTCTTGTTACTCAGATGGGAGGAGGAAATGAAGAGAAAGCAAAAATGATCCAGACTCTGTTGTTTGTAGCTGGCATAAACACATTTTTCCAAACACTGTTTGGGACTCGT…
Chr01	GmHk_01G000323.1	3617965	3620913	+	SMO2-2_1	Methylsterol monooxygenase 2-2	GO:0005506;GO:0008610;GO:0016491;GO:0055114		PF04116			fatty acid hydroxylase	I	MASLIESGWQYLITHFSDFQLACLGSFFLHEGVFFLSGLPFIWLERAGWMSKYKIQAKNNTPAAQEKCIVRLLLYHFGVNLPVMIFSYPVFTYMGMRSSLPLPSCLFSKIGFWSCRKVVLIQIIFYFILEDFIFYWGHRILHTKWLYKHVHSVHHEYATPFGLTSEYAHPAEILFLGFATIFGPAITGPHLITLWLWMVLRVLETVEAHCGYHFPWSLSNFLPLYGGADFHDYHHRLLYTKSGNYSSTFTYMDRIFGTDIGYRKLKALKSIGVEDSSEQKKQ	ATGGCGTCCCTCATCGAATCTGGCTGGCAGTACTTGATCACACATTTCAGTGACTTTCAACTGGCGTGTTTGGGAAGTTTCTTTCTACATGAAGGCGTTTTCTTCTTGTCTGGACTTCCCTTTATATGGCTTGAGAGGGCAGGGTGGATGAGCAAGTACAAAATTCAGGCCAAAAATAACACCCCTGCAGCTCAGGAGAAATGTATTGTTCGTCTGTTGCTTTACCATTTTGGTGTCAATCTACCTGTTATGATTTTTTCATATCCTGTCTTCACATACATGGGCATGCGGAGTAGTCTTCCCCTACCGTCCTGCTTATTTAGCAAGATTGGATTTTGGTCTTGCAGGAAAGTAGTTCTAATTCAAATAATCTTTTACTTCATTTTGGAGGACTTTATA…
Chr01	GmHk_01G000323.2	3617965	3620913	+	SMO2-2_1	Methylsterol monooxygenase 2-2	GO:0005506;GO:0008610;GO:0016491;GO:0055114		PF04116			fatty acid hydroxylase	I	MASLIESGWQYLITHFSDFQLACLGSFFLHEGVFFLSGLPFIWLERAGWMSKYKIQAKNNTPAAQEKCIVRLLLYHFGVNLPVMIFSYPVFTYMGMRSSLPLPSWKVVLIQIIFYFILEDFIFYWGHRILHTKWLYKHVHSVHHEYATPFGLTSEYAHPAEILFLGFATIFGPAITGPHLITLWLWMVLRVLETVEAHCGYHFPWSLSNFLPLYGGADFHDYHHRLLYTKSGNYSSTFTYMDRIFGTDIGYRKLKALKSIGVEDSSEQKKQ	ATGGCGTCCCTCATCGAATCTGGCTGGCAGTACTTGATCACACATTTCAGTGACTTTCAACTGGCGTGTTTGGGAAGTTTCTTTCTACATGAAGGCGTTTTCTTCTTGTCTGGACTTCCCTTTATATGGCTTGAGAGGGCAGGGTGGATGAGCAAGTACAAAATTCAGGCCAAAAATAACACCCCTGCAGCTCAGGAGAAATGTATTGTTCGTCTGTTGCTTTACCATTTTGGTGTCAATCTACCTGTTATGATTTTTTCATATCCTGTCTTCACATACATGGGCATGCGGAGTAGTCTTCCCCTACCGTCCTGGAAAGTAGTTCTAATTCAAATAATCTTTTACTTCATTTTGGAGGACTTTATATTCTACTGGGGACATAGAATACTGCACACAAAG…
Chr01	GmHk_01G000324.1	3623141	3624090	-	cbh2_0	CENP-B 2		IPR006600				tigger transposable element derived	S	MKLVYPHDDSNFNFSIGWLGKFKHRHGIKSFRRFGESESVYVQDMKQKLVSIWEKIDQFIMKDVFNMDETELFYRLQANHSLATKQLEGRKQDKERLTVVICCNEDGSEANCFRHYKIRSASDVARNLDESTFDEETQDLETMINQCGYHNKMDIDNLMNYPGENEACSEVQSLEDIVGTIIENNAEDDGEDDTVSLEPVT	ATGAAACTCGTGTACCCTCATGATGATTCAAATTTTAACTTCTCTATAGGATGGCTAGGGAAATTCAAGCACCGACATGGCATAAAGTCATTTCGTCGTTTTGGCGAGAGTGAGTCTGTTTATGTACAAGACATGAAGCAGAAATTGGTATCGATTTGGGAGAAAATTGATCAGTTCATTATGAAAGATGTTTTCAATATGGATGAAACTGAGTTGTTTTATAGGCTACAAGCTAATCATTCACTGGCAACAAAACAACTTGAAGGAAGAAAACAAGATAAAGAAAGGTTGACGGTAGTTATTTGTTGCAATGAAGATGGCTCTGAAGCGAATTGCTTTCGACACTATAAAATTCGTTCAGCTAGTGACGTTGCAAGAAATTTGGATGAATCCACTTTT…
Chr01	GmHk_01G000325.1	3653043	3654290	+	-	hypothetical protein		IPR025322	PF14009			expressed protein	S	MGNCQAVDGAVLVIQHPCGKIERLYWPVTASEVMRTNPGHYVSLIIPLPVPPQEQNQEKKTVRFTRVKLLRPNETLNLGHAYRLITTQEVMKVLKAKKHAKTRKPQAAETEKPHTVLPEKQSSASEAHTGGDSTHQGMRAERHRPRTASANPAVVRSKSWRPSLQSISESAS	ATGGGGAATTGCCAAGCTGTGGATGGTGCAGTGCTTGTGATCCAACACCCTTGTGGGAAGATAGAGAGGTTGTATTGGCCAGTCACTGCAAGTGAGGTCATGAGGACTAATCCTGGCCACTATGTTTCTTTGATAATACCATTGCCTGTGCCACCACAGGAGCAGAATCAAGAGAAGAAAACTGTGCGTTTCACACGCGTTAAGCTGCTCCGGCCTAATGAGACTCTCAACCTTGGCCATGCTTACAGGCTCATCACCACTCAAGAGGTTATGAAGGTGTTGAAAGCAAAGAAGCATGCAAAGACAAGGAAGCCACAGGCTGCGGAGACCGAGAAGCCGCATACGGTGCTGCCGGAGAAGCAGAGTTCAGCTAGTGAGGCACACACAGGAGGGGATTCT…
Chr01	GmHk_01G000326.1	3667287	3669872	+	RGA2_0	Disease resistance protein RGA2	GO:0043531	IPR027417;IPR032675;IPR038005;IPR041118	PF00931;PF18052	cd14798		leucine Rich Repeat	S	MAEAVVEIVLEKLNSLIQKELGLFFGFDEDMKRIASLLTTIKATLEDAEEKKFSNIGIKYWLGKLKDAARILDDILDECGPSNKVQSSYLSSFLPKHVVFHYKIVKKMKRVREMLEEISDERNKFNLTEMVLERSRVIEWRKTTSSITDRQIYGREEDKDKIVNFLVDDAPQSEDLSVYPIVGLGGLGKTTLAQLVFNHKKVVSHFELRFWVCVSEDFSLRRMIKAIIKAASGHACEDLDLEPQQRRLQDLLQRKRYLLVLDDVWDDKQENWQKLKSLLACGAKGASILVTTRLSKVAEIMGTIKIPHELSLLSDNDCWELFKHQAFGPNEVELENMGKEIVKKCRGLPLAAKALGSLLHSARKKHEWFMNVKGRNLLELSLEDNSIMASLRLSYFKLP…	ATGGCTGAGGCTGTTGTTGAAATTGTGCTTGAGAAATTGAACTCGCTCATTCAAAAGGAGCTAGGACTATTCTTTGGTTTCGATGAAGACATGAAAAGGATTGCCAGCTTGCTCACTACAATCAAGGCTACGCTTGAAGATGCTGAGGAGAAAAAATTCTCAAACATAGGTATTAAATATTGGCTGGGAAAGCTAAAGGATGCAGCTCGCATCCTGGATGACATCTTGGACGAGTGTGGTCCATCAAACAAGGTACAAAGCTCTTACTTATCCTCTTTTCTTCCCAAGCATGTTGTTTTCCATTACAAAATTGTTAAGAAAATGAAAAGGGTAAGAGAGATGTTAGAAGAAATTTCTGATGAAAGGAATAAGTTTAATTTGACTGAGATGGTTCTTGAG…
Chr01	GmHk_01G000327.1	3691483	3694270	-	CYCD1-1_1	Cyclin-D1-1	GO:0005634	IPR006671;IPR013763;IPR036915;IPR039361	PF00134;PF02984	cd00043		(DC) complex that phosphorylates and inhibits members of the retinoblastoma (RB) protein family including RB1 and regulates the cell-cycle during G(1) S transition. Phosphorylation of RB1 allows dissociation of the transcription factor E2F from the RB E2F complex and the subsequent transcription of E2F target genes which are responsible for the progression through the G(1) phase. Hypophosphorylat…	D	MKEATRIFHQQLHSLFLHSSPQLTLPAKPPRKPWPENESPPIAMSVSCSNCFPDDDHSFLLCGEDSSGIMDSSPECSSDLDSSPPSEAESIAGFMEDERNFVPGFEYLNRFQSRSLDASAREESVAWILKVQAYYAFQPVTAYLSVNYLDRFLNSRPLPPKTNGWPLQLLSVACLSLAAKMEESLVPSLLDLQVEGAKYVFEPKTIRRMELLVLGVLDWRLRSVTPFSFLDFFACKLDSTGTFTGFLISRATQIILSNIQEASFLAYWPSCIAAAAILHAANEIPNWSLVRPEHAESWCEGLRKEKIIGCYQLMQELVIDNNQRKPPKVLPQLRVTISRPIMRSSVSSFLASSSSPSSSSLSCRRRKLNNSLWVDDDKGNSQ	ATGAAGGAAGCGACCCGTATCTTTCATCAACAGCTACACTCTCTCTTTCTTCACTCTTCACCGCAACTCACACTTCCGGCGAAACCTCCCCGGAAGCCATGGCCAGAGAATGAGTCTCCGCCGATTGCCATGTCGGTCTCCTGCTCCAACTGCTTCCCCGACGACGACCACTCCTTCCTCCTCTGCGGCGAGGACTCCTCCGGAATCATGGATTCCTCGCCGGAGTGTTCCTCCGACCTCGATTCCTCGCCGCCGTCGGAGGCGGAGTCCATCGCCGGATTCATGGAAGACGAGCGCAACTTCGTCCCCGGATTCGAATACCTCAATAGGTTCCAATCTCGCTCTCTCGACGCCTCTGCCAGAGAAGAATCCGTTGCATGGATTCTCAAGGTGCAGGCT…
Chr01	GmHk_01G000327.2	3691483	3694270	-	CYCD1-1_1	Cyclin-D1-1	GO:0005634	IPR006671;IPR013763;IPR036915;IPR039361	PF00134;PF02984	cd00043		(DC) complex that phosphorylates and inhibits members of the retinoblastoma (RB) protein family including RB1 and regulates the cell-cycle during G(1) S transition. Phosphorylation of RB1 allows dissociation of the transcription factor E2F from the RB E2F complex and the subsequent transcription of E2F target genes which are responsible for the progression through the G(1) phase. Hypophosphorylat…	D	MKEATRIFHQQLHSLFLHSSPQLTLPAKPPRKPWPENESPPIAMSVSCSNCFPDDDHSFLLCGEDSSGIMDSSPECSSDLDSSPPSEAESIAGFMEDERNFVPGFEYLNRFQSRSLDASAREESVAWILKKTNGWPLQLLSVACLSLAAKMEESLVPSLLDLQVEGAKYVFEPKTIRRMELLVLGVLDWRLRSVTPFSFLDFFACKLDSTGTFTGFLISRATQIILSNIQEASFLAYWPSCIAAAAILHAANEIPNWSLVRPEHAESWCEGLRKEKIIGCYQLMQELVIDNNQRKPPKVLPQLRVTISRPIMRSSVSSFLASSSSPSSSSLSCRRRKLNNSLWVDDDKGNSQ	ATGAAGGAAGCGACCCGTATCTTTCATCAACAGCTACACTCTCTCTTTCTTCACTCTTCACCGCAACTCACACTTCCGGCGAAACCTCCCCGGAAGCCATGGCCAGAGAATGAGTCTCCGCCGATTGCCATGTCGGTCTCCTGCTCCAACTGCTTCCCCGACGACGACCACTCCTTCCTCCTCTGCGGCGAGGACTCCTCCGGAATCATGGATTCCTCGCCGGAGTGTTCCTCCGACCTCGATTCCTCGCCGCCGTCGGAGGCGGAGTCCATCGCCGGATTCATGGAAGACGAGCGCAACTTCGTCCCCGGATTCGAATACCTCAATAGGTTCCAATCTCGCTCTCTCGACGCCTCTGCCAGAGAAGAATCCGTTGCATGGATTCTCAAGAAAACGAAT…
Chr01	GmHk_01G000328.1	3709267	3712479	+	-	hypothetical protein	GO:0003676	IPR035979		cd00590		NA	S	MLRSTPIPAPYNSVPVLSIARTCHSLAPARAVHSHSSFVSRLVFPQFRQYIVNVPGRVFVAAAAKKQRRGGAELAVTDDGFDDDEEYDDDDFYDEYDDDDDDEEEEFDDDEDDEGMLSLEKMNKWFEKKPRGFGEGKVYDTSVEDKLLEEMRQSRIAQAENLKKLMSNPVKHASNESVQKKKDAELVPIGGRVCLVNLPKKKNIHKDLKSALQGIPGIINIVPAVTGNKKTRDPICKGFAYVDFKREEDAVRFVELYTGQTITFGKIQKQIKCELLNVQSSSSLKLSKNLSAAPQLVAAAFEEDSNEDSNLDGSARSSWDETNSSDDLDDLDYQMNGEEQEDDEDNQESVTALGVDHDDNVEMRIDPENISLPSEQVDRNPAAVQKSSAKVKQENARKK…	ATGCTCCGTTCAACTCCAATTCCGGCACCGTACAATTCGGTGCCAGTTCTCTCTATCGCCCGCACGTGTCACTCTCTAGCACCTGCACGTGCCGTTCATTCCCATTCCTCTTTCGTTTCGCGGCTCGTGTTCCCACAATTCCGGCAATACATCGTAAATGTTCCCGGCCGAGTGTTTGTCGCGGCAGCCGCAAAGAAGCAACGGCGCGGCGGCGCTGAACTCGCTGTAACGGACGACGGTTTCGACGATGACGAGGAGTACGACGACGACGATTTTTATGATGAGTACGATGATGATGATGATGATGAAGAAGAAGAGTTTGATGATGATGAAGATGATGAGGGGATGCTTTCATTGGAGAAGATGAATAAATGGTTTGAGAAGAAGCCGAGGGGTTTT…
Chr01	GmHk_01G000329.1	3721097	3736119	+	RGA3_1	Putative disease resistance protein RGA3	GO:0043531	IPR027417;IPR036388;IPR038005;IPR041118	PF00931;PF18052	cd14798		leucine Rich Repeat	S	MAEAVLETVLENLNSLIQKELGLFLGFDQDVKRLVSLFTTIKATLADAEERQFSDRSIKDWLQKLKDAAHVLDDILDECAYEAWRLEYQGVKCCLSDKVQCSCLSSFHPEHVVFRYKLAKKMKRISERLEEIADERTKFHFTEMVTDKRNGVLEWRQTTSFITEPEVYGREEDQDKIIDFLVGDASHSEDLSVYPIIGLGGLGKTTLAQLIFNHERVVNNFEPRIWVCVSEDFSLKRMTKAIIEVASGRACEDLLLEILQRRLQDLLQSKRYLLVLDDVWDDEQENWQKLKSILACGAQGASVLVTTRLSKVAAIMGTMPPHELAMLSDNDCWKLFKHRAFGPNEVEQEKLVILGKEIVKKCGGVPLAAKALGGLLRFKREEREWLKIKESNLWSLPHN…	ATGGCTGAGGCTGTTCTTGAGACTGTGCTTGAGAATTTGAACTCACTCATTCAAAAGGAATTGGGACTATTTCTGGGTTTTGACCAAGACGTGAAAAGGCTGGTCAGCTTGTTCACTACAATCAAGGCTACGCTTGCAGATGCTGAAGAGAGACAATTCTCAGACAGATCTATAAAGGATTGGCTGCAAAAGCTTAAAGATGCAGCTCACGTCCTGGATGACATCTTGGATGAGTGTGCCTATGAAGCATGGAGGTTGGAGTACCAAGGAGTCAAGTGTTGTCTATCAGACAAGGTACAATGCTCTTGCCTGTCCTCTTTTCATCCCGAGCATGTTGTTTTCCGTTACAAACTTGCTAAGAAAATGAAAAGGATAAGTGAGAGATTAGAAGAAATTGCT…
Chr01	GmHk_01G000330.1	3724786	3726026	-	-	hypothetical protein		IPR005162	PF03732			Retrotransposon protein	L	MNRWNSLRTWDEVVEKFLKKYFPESKTIEGKVEISSFHQHPHESLSEALDRFHGLLWKIPTHGFSEPVQLNIFMDGLQPHSKQLLDASAGGKIELKTPEEAIELIKNMAANDYVILRDQEPRPQEERSRLEELLVQFMQETRSHQKSTDAAIRNLEVQLAKLVAERPTETFTVNTEMKPKKECKVILTEEDVEEEKKEEIERNEEKAQQWEKYSQVEIQQESILQVNTTPHQLIVKEERHGKHDKPLSVLLSLTTNTFLATIWKVFPAYMSFMASLAKRRKCKEDVFFVTFMPP	ATGAATAGATGGAATAGCCTGCGGACATGGGACGAGGTGGTGGAGAAATTCTTGAAGAAATATTTCCCAGAGTCCAAGACCATTGAGGGAAAGGTGGAAATCTCATCCTTCCACCAACACCCTCATGAATCATTGAGTGAAGCCCTTGATCGCTTTCATGGGTTACTTTGGAAGATTCCTACACATGGGTTTAGTGAGCCAGTCCAGCTCAACATCTTTATGGATGGCTTGCAACCCCATTCCAAGCAGCTCCTTGACGCCTCAGCCGGTGGGAAGATCGAGTTAAAGACTCCAGAAGAAGCTATTGAGCTAATAAAGAATATGGCGGCCAATGATTATGTCATTCTACGTGACCAAGAGCCCAGGCCACAGGAAGAAAGGAGTAGGCTAGAAGAATTG…
Chr01	GmHk_01G000331.1	3736481	3738448	-	UGT74B1_0	UDP-glycosyltransferase 74B1	GO:0016758	IPR035595	PF00201	cd03784		Transferase	S	MVHQRQNNIHVLVLPYPAQGHINPLVQFAKRLASKGVKATVATTHYTANSINAPNITVEAISDGFDQAGFAQTNNNVQLFLASFRTNGSRTLSELIKKHQQTPSPVTCIVYDSFFPWVLDVAKQHGIYGAAFFTNSAAVCNIFCRLHHGFIQLPVKMEHLPLRVPGLPPLDSRALPSFVRFPESYPAYMAMKLSQFSNLNNADWMFVNTFEALESEVLKGLTELFPAKMIGPMVPSGYLDGRIKGDKGYGASLWKPLTEECSNWLESKPPQSVVYISFGSMVSLTEEQMEEVAWGLKESGVSFLWVLRESEHGKLPCGYRESVKDKGLIVTWCNQLELLAHQATGCFVTHCGWNSTLESLSLGVPVVCLPQWADQLPDAKFLDEIWEVGVWPKEDEKGI…	ATGGTTCATCAGAGGCAAAACAACATCCATGTTCTTGTTCTTCCATACCCTGCCCAAGGCCACATCAACCCCCTTGTCCAATTCGCAAAAAGATTAGCTTCAAAGGGTGTCAAAGCCACAGTTGCCACCACCCACTACACTGCCAACTCCATCAATGCACCCAACATCACGGTCGAAGCCATCTCCGATGGTTTCGACCAAGCCGGCTTCGCCCAGACCAACAACAACGTGCAACTCTTCCTTGCCTCCTTCAGAACAAACGGCTCCAGGACCTTGTCTGAGCTCATCAAAAAACACCAACAAACTCCCTCCCCCGTCACCTGCATTGTCTATGACTCATTTTTCCCCTGGGTTCTCGACGTGGCGAAGCAGCATGGCATTTACGGAGCCGCCTTTTTC…
Chr01	GmHk_01G000332.1	3752423	3753663	-	RGA4_2	Putative disease resistance protein RGA4		IPR032675				leucine Rich Repeat	S	MVVALQKLRTTSSSLRISEVINIKYIYEECYDGREVFKTLEYLSLSSLLNLTRLSRENGENMFPRFSTIYIFECHKFLAKEVLVQELHSLKKLKIYGCGKFNVLASSHCLTCLEDLTFDNYREVEGLQHLTAMKNLTVYDLRNLESLPGCLGNLSLLKSLTLKDLPKLESFPDCFENLPLLLKLTILRCPKLRCLSESLSFNNIKILWIICCCPKLRKRSEKKTGEDWPKIAHISLIHIKLLELSDNENSIMSILRLSYLILPIKLRQCFAFCSIFPKDAEIRKQY	ATGGTGGTGGCGCTGCAAAAGTTGCGTACAACTTCCAGTAGTCTAAGGATATCTGAGGTGATTAATATAAAATACATATACGAGGAGTGCTATGATGGTAGAGAAGTTTTCAAGACTTTAGAATATCTTTCACTCTCTTCTCTGCTAAATCTAACAAGGTTATCAAGGGAGAATGGGGAAAACATGTTCCCACGCTTTTCCACAATATATATTTTTGAATGTCATAAATTTTTGGCGAAGGAAGTATTGGTGCAAGAGTTGCACTCTCTTAAGAAATTAAAAATTTATGGGTGTGGGAAGTTCAATGTGTTGGCAAGTTCTCATTGCCTGACTTGTCTTGAGGATTTGACATTTGACAATTACAGAGAGGTGGAAGGTTTACAACATCTGACTGCCATG…
Chr01	GmHk_01G000333.1	3768076	3775804	+	-	hypothetical protein						Retrotransposon protein	S	MVVVIFLIEVSDTDDGEIEGDVNHRIQAGWMKWRKASGVLCDAKVPIKLKGKFYRTAVRPAILYGTECWAVKSQHENKVGVAEMRMLRWMCGKTRQDKIRNEAIRERVGVAPIVEKMVENRLRWFGHVERRPVDSVVRRVDQMERRQTIRGRGRPKKTIREVIKKDLELNDLDRSMVSDTVVVAPAEDATMLDSLTSSVKFVLNMDTLSISVVSSSSVANLWHARLGHSNGHSYIYRIPSSRARHEDFRCLSHESRGYGKNTTENKVYEFQNFKGNKGSPGKLLGKGRNFFLSRNE	ATGGTCGTGGTGATTTTTCTGATCGAGGTGTCGGACACGGATGATGGGGAAATTGAAGGGGATGTGAATCATCGCATTCAAGCAGGATGGATGAAATGGAGAAAAGCATCGGGGGTGTTATGTGATGCAAAGGTACCGATCAAGCTAAAGGGAAAGTTTTATCGGACTGCGGTAAGACCAGCGATTTTGTACGGAACAGAATGTTGGGCGGTCAAGAGCCAACATGAGAATAAAGTAGGTGTAGCGGAGATGAGGATGTTGCGGTGGATGTGTGGTAAGACTCGACAGGATAAAATTAGAAACGAAGCTATTAGAGAGAGGGTTGGAGTAGCGCCTATTGTAGAGAAGATGGTGGAAAATAGACTTAGGTGGTTTGGGCATGTAGAGAGAAGACCGGTA…
Chr01	GmHk_01G000334.1	3756325	3777554	-	NLRC3_0	NLR family CARD domain-containing protein 3	GO:0005515	IPR032675	PF13516			leucine Rich Repeat	S	MAFTSTLSLYSHPQVRLRCQRLQSLAFTAAGVAQFAPLPPLNCRRTCSPRSFVVRASSSVEGSRARAGGSRRVYRQSQANAPLSSAPVKQIANVVAPVAAFFALTFVIWKLVEKLLVPTPKQLKYSTGESQSPSQGLKWSFAAGTNLLSQLGEKIERQSRQKLNEFARELRSFPSIDMSGRNFGDEGLFFLAESLAFNQTAEEVSFAANGITAAGLRAFDGVLQSNITLKTLDLSGNLVGDEGAKCLCDILVNNSSIEKLQLNSADLGDVGAKAIAEMLKKNSSLRVVELNNNMIEYSGFSSLAGALLENNSIRNIHLNGNYGGALGANALAKALESNKSIRELHLHGNSIGDEGICSLMTGLSSHKGKLTLLDIGNNSLTAKGSFHVAEYIRKSRNLL…	ATGGCCTTCACTTCCACTCTCTCTCTCTACTCTCACCCGCAGGTTCGCCTCCGCTGCCAGCGGCTGCAATCGCTGGCCTTCACCGCCGCCGGCGTCGCTCAATTTGCGCCGCTTCCGCCTCTGAACTGCCGGAGAACGTGTTCTCCGAGAAGCTTCGTGGTTAGGGCTTCTTCGAGCGTGGAAGGAAGTCGCGCGCGTGCCGGTGGTTCTCGCAGAGTCTATCGCCAGTCTCAGGCCAACGCGCCGCTATCCAGTGCGCCGGTGAAACAGATTGCCAACGTTGTTGCTCCCGTCGCCGCGTTCTTCGCCCTCACTTTTGTTATCTGGAAATTAGTGGAGAAACTTCTTGTTCCAACTCCAAAGCAATTGAAATATTCAACTGGGGAGAGTCAATCCCCT…
Chr01	GmHk_01G000335.1	3779847	3780113	+	-	hypothetical protein							R	MLKAEATKELYTFNHLIEGIASMASGVKFSFFIALFIVLVAVGAAHEGHDHMAPAEPPSNHASSLKNHAVVGGLFPLLLTLLIARERL	ATGTTGAAGGCAGAAGCAACTAAAGAATTATATACCTTCAATCATCTGATCGAGGGCATTGCTAGTATGGCTTCAGGAGTCAAATTCTCATTCTTCATAGCTCTTTTCATTGTTTTGGTTGCAGTTGGAGCTGCTCACGAGGGGCATGATCACATGGCTCCAGCAGAACCACCTTCTAATCATGCAAGCAGCCTCAAAAACCATGCAGTGGTTGGTGGACTCTTTCCCCTTCTGCTTACACTTCTCATTGCCAGAGAGAGGCTTTGA
Chr01	GmHk_01G000336.1	3783485	3783706	+	-	hypothetical protein							R	MASPLKFTVFSACVLVLCVVVAAQYDGPGNGSDMPKDMPMGPAPHSNASLTCPAIITILLPFMLAFLAAKERI	ATGGCTTCACCACTCAAGTTCACTGTGTTCTCAGCTTGTGTTTTGGTTTTGTGTGTGGTGGTTGCTGCTCAATATGATGGGCCTGGCAATGGCTCTGACATGCCCAAGGACATGCCTATGGGTCCTGCACCACATTCCAATGCTTCTCTTACTTGTCCTGCAATCATAACTATTCTCCTTCCCTTTATGCTTGCCTTTCTTGCTGCTAAGGAGAGAATTTAA
Chr01	GmHk_01G000337.1	3788071	3791780	-	ATJ16_2	Chaperone protein dnaJ 16		IPR001623;IPR018253;IPR036869	PF00226	cd06257		DNAj domain protein	O	MPGHRSKSEKHGGGGEKPLRRDPYEVLGVSRNSTDQEIKTAYRKMALKYHPDKNANDPKAADMFKEATFSYNILSDPDKRRQYDSAGFEAVESDNQELELDLSSLGAVNTMFAALFSKLGVPIKTTVSATVLEEALNGLVTIRPLPLGHNIAKRVEKQCAHFYSVTITEEEAQAGFVCRVQSPDKSKFKLLYFDQEDNSGLSLALQEDSAKTGKVTSAGMYFLGFPVYRLDQTMNSIAAAKDPDTSFFRKLDAFQPCELTELKAGTHVFAVYGDNFFKSANYTIEALCAAPFSEEKENLRNIEAQILSKRAEISKFEAEYREVLAQFSDMTNRYAHEMQAIDELLKNRNEIQASYTSAPLKRTTSRSRSKNSAKEAKEDGQAKEKRSTRERPKKKKWYN…	ATGCCGGGGCACCGCTCGAAATCGGAGAAGCATGGCGGCGGCGGCGAGAAGCCGCTCCGGCGGGACCCCTACGAGGTCCTCGGCGTCTCGCGCAACTCCACGGATCAGGAAATCAAAACCGCCTACCGCAAAATGGCGCTCAAATATCATCCGGACAAGAATGCAAATGATCCTAAAGCAGCTGATATGTTTAAAGAGGCTACCTTCTCTTATAATATCCTGTCAGATCCTGATAAACGGCGTCAGTACGACTCAGCTGGCTTTGAGGCTGTTGAATCAGACAACCAAGAGTTGGAGTTAGATCTTTCAAGTTTAGGTGCTGTCAATACAATGTTTGCAGCACTTTTTAGTAAACTTGGTGTTCCAATTAAGACAACTGTATCTGCAACTGTTTTGGAA…
Chr01	GmHk_01G000337.2	3788071	3791780	-	ATJ16_2	Chaperone protein dnaJ 16		IPR001623;IPR018253;IPR036869	PF00226	cd06257		DNAj domain protein	O	MPGHRSKSEKHGGGGEKPLRRDPYEVLGVSRNSTDQEIKTAYRKMALKYHPDKNANDPKAADMFKEATFSYNILSDPDKRRQYDSAGFEAVESDNQELELDLSSLGAVNTMFAALFSKLGVPIKTTVSATVLEEALNGLVTIRPLPLGHNIAKRVEKQCAHFYSVTITEEEAQAGFVCRVQSPDKSKFKLLYFDQEDNSGLSLALQEDSAKTGKVTSAGMYFLGFPVYRLDQTMNSIAAAKDPDTSFFRKLDAFQPCELTELKAGTHVFAVYGDNFFKSANYTIEALCAAPFSEEKENLRNIEAQILSKRAEISKFEAEYREVLAQFSDMTNRYAHEMQAIDELLKNRNEIQASYTSAPLKRTTSRSRSKNSAKEAKEDGQAKEKRSTRERPKKKKWYN…	ATGCCGGGGCACCGCTCGAAATCGGAGAAGCATGGCGGCGGCGGCGAGAAGCCGCTCCGGCGGGACCCCTACGAGGTCCTCGGCGTCTCGCGCAACTCCACGGATCAGGAAATCAAAACCGCCTACCGCAAAATGGCGCTCAAATATCATCCGGACAAGAATGCAAATGATCCTAAAGCAGCTGATATGTTTAAAGAGGCTACCTTCTCTTATAATATCCTGTCAGATCCTGATAAACGGCGTCAGTACGACTCAGCTGGCTTTGAGGCTGTTGAATCAGACAACCAAGAGTTGGAGTTAGATCTTTCAAGTTTAGGTGCTGTCAATACAATGTTTGCAGCACTTTTTAGTAAACTTGGTGTTCCAATTAAGACAACTGTATCTGCAACTGTTTTGGAA…
Chr01	GmHk_01G000337.3	3788071	3791780	-	ATJ16_2	Chaperone protein dnaJ 16		IPR001623;IPR018253;IPR036869	PF00226	cd06257		DNAj domain protein	O	MPGHRSKSEKHGGGGEKPLRRDPYEVLGVSRNSTDQEIKTAYRKMALKYHPDKNANDPKAADMFKEATFSYNILSDPDKRRQYDSAGFEAVESDNQELELDLSSLGAVNTMFAALFSKLGVPIKTTVSATVLEEALNGLVTIRPLPLGHNIAKRVEKQCAHFYSVTITEEEAQAGFVCRVQSPDKSKFKLLYFDQEDNSGLSLALQEDSAKTGKVTSAGMYFLGFPVYRLDQTMNSIAAAKDPDTSFFRKLDAFQPCELTELKAGTHVFAVYGDNFFKSANYTIEALCAAPFSEEKENLRNIEAQILSKRAEISKFEAEYREVLAQFSDMTNRYAHEMQAIDELLKNRNEIQASYTSAPLKRTTSRSRSKNSAKEAKEDGQAKEKRSTRERPKKKKWYN…	ATGCCGGGGCACCGCTCGAAATCGGAGAAGCATGGCGGCGGCGGCGAGAAGCCGCTCCGGCGGGACCCCTACGAGGTCCTCGGCGTCTCGCGCAACTCCACGGATCAGGAAATCAAAACCGCCTACCGCAAAATGGCGCTCAAATATCATCCGGACAAGAATGCAAATGATCCTAAAGCAGCTGATATGTTTAAAGAGGCTACCTTCTCTTATAATATCCTGTCAGATCCTGATAAACGGCGTCAGTACGACTCAGCTGGCTTTGAGGCTGTTGAATCAGACAACCAAGAGTTGGAGTTAGATCTTTCAAGTTTAGGTGCTGTCAATACAATGTTTGCAGCACTTTTTAGTAAACTTGGTGTTCCAATTAAGACAACTGTATCTGCAACTGTTTTGGAA…
Chr01	GmHk_01G000338.1	3815432	3816157	-	GIS3_0	Zinc finger protein GIS3	GO:0003676	IPR036236	PF13912			zinc finger protein	S	MEKDIILLSPTWDGDNGNSTEKRLRLFGFELNPSKDGYAKESGEGDESVNSSNSVSSGGDKTVQEKPSAKDSDERKFECQYCYKEFANSQALGGHQNAHKKERMKKKRLQLQSINRYLQHPFQSKHGFAYPSDTPWFYDPSTYNNSEFTLSEEPQISFNSNVLDANFSCDQKSSWYSLASHPSNSQQDTCMFTFSNASNNSPFIFKPCHFPASNQSHKSKALDLQLGLNLQSNTRSSLRRM	ATGGAAAAGGATATCATTCTTCTTTCTCCAACATGGGATGGTGACAATGGCAATTCCACTGAGAAAAGGCTCAGGCTATTTGGTTTTGAGCTAAACCCTTCTAAAGATGGTTATGCCAAAGAATCTGGTGAAGGAGATGAAAGTGTGAACTCCTCTAACTCAGTTTCTTCTGGAGGAGACAAAACTGTGCAAGAGAAACCCTCTGCCAAAGACTCTGATGAGAGAAAGTTTGAGTGCCAATATTGTTACAAGGAATTTGCAAACTCACAAGCCCTAGGAGGCCACCAAAATGCTCACAAGAAAGAGAGAATGAAGAAGAAGAGGTTGCAGCTTCAATCCATAAACCGCTACCTACAACACCCTTTCCAATCCAAGCATGGCTTTGCTTACCCTTCTGAT…
Chr01	GmHk_01G000339.1	3820298	3828438	-	Sec23ip_0	SEC23-interacting protein	GO:0005515	IPR013761	PF00536			Sterile alpha motif (SAM) domain-containing protein	S	MCCNLKDSTKLNTKRSPQDYPSWTFKQGCLQSVHLNPNSNRGGDVFFSASASSRGNGIRVRVTVRVSVIVMSDPSRGRVTITLGRSGHVVKRDASAVDVSSFSSIHSAGTKRSVRDRIGSNADSSGWHGNGHSGNKRHRGDVSMQNGLDGNDLRLKLMRKSALGQADSNGSKRHMDLREKLSKASHPLANTYNSKQHGPDSRETSLRQIPSARSSDKLLRMESMRSSYSPWTLDHIRRRSPDGFPSTSRGISPQRDVQDLHRRPVSRTYDGVRSVSYVGRDVLETSRPPISTPQSFMSRSTMSTLPPVTVKPVASHPGQLPPSGSVAQRPSYVGDEQVQVQQSHQTVDGLLHALGLQKYAILFKAEEVDMTALKQMGENDLKELGIPMGPRKKILLAVL…	ATGTGTTGCAACCTTAAGGATTCCACAAAACTCAACACCAAGAGGAGTCCCCAAGATTATCCTTCATGGACATTCAAGCAAGGTTGCCTGCAATCTGTCCACCTGAATCCGAATTCAAACCGTGGTGGTGACGTGTTTTTCTCTGCCTCTGCTTCTAGTCGCGGCAATGGGATTAGGGTTAGGGTTACGGTTAGGGTTTCGGTTATCGTCATGTCCGATCCTTCGAGGGGTCGCGTTACCATTACACTAGGGCGTAGCGGTCATGTTGTGAAGAGGGATGCATCTGCTGTAGATGTTTCTTCTTTCTCTTCTATTCATTCAGCTGGCACTAAGCGGTCTGTAAGAGACAGAATTGGAAGTAATGCAGATAGTTCTGGGTGGCATGGAAATGGACATAGC…
Chr01	GmHk_01G000340.1	3834555	3836561	-	-	hypothetical protein		IPR004252	PF03004			NA	S	MGNRKKLNIIQNDGQSQAKEQSIESSTEVNQNNNYILEENAQFEGEQHIQEDSHVQSHTSLESASESSTKGKKKTRGYTHMLDVWDLLDGEFILVEVNHWGNPMRWEGKTLLNATGSLSKFRFVPELTEQIKKILIDDMSLKWRQFKYELKSKGYDESKTKEEMVAHIPDPRVDPSQYRDLVHYWCSEKGQKISNINKRSRSKYEDLRCMGTNNLPRRIHEMTTKAKGVQPSRTKIYIDTRTRKDGSIVTEKAAIVIDELKKKMVEAESLQNLQSTQDSTNWTNDIYSKVKGPEKRGRVCCLGKLPHQASSSQSSYANNRIQKLENLLGNLVAVLKVRFAEDPQINQVLEAIDQEVPTNGSTSKDHQTTNNLN	ATGGGAAATCGCAAAAAGTTGAATATCATTCAGAATGATGGTCAATCACAAGCAAAAGAGCAATCAATTGAAAGCTCTACTGAAGTGAACCAAAATAACAACTATATACTTGAAGAAAATGCACAATTTGAAGGAGAACAACACATACAAGAAGATAGTCATGTTCAGTCTCATACTTCTCTTGAAAGTGCAAGTGAAAGTTCAACTAAAGGTAAAAAGAAAACTAGAGGTTATACACATATGCTAGATGTGTGGGACTTGCTAGATGGAGAATTCATACTTGTTGAAGTAAATCATTGGGGCAATCCTATGCGTTGGGAAGGGAAAACTCTACTGAATGCAACTGGGAGCTTGAGTAAGTTTCGATTTGTTCCTGAATTAACTGAACAAATAAAGAAA…
Chr01	GmHk_01G000340.2	3834555	3836561	-	-	hypothetical protein						NA	S	MGNRKKLNIIQNDGQSQAKEQSIESSTEVNQNNNYILEENAQFEGEQHIQEDSHVQSHTSLESASESSTKGKKKTRGYTHMLDVWDLLDGEFILVEVNHWGNPMRWEGKTLLNATGSLSKFRFVPELTEQIKKILIDDMSLKWRQFKYELKSKGYDESKTKEEMVAHIPDPRVDPSQYRDLVHYWCSEKGQKISNINKRSRSKYEDLRCMGTNNLPRRIHEMDELKKKMVEAESLQNLQSTQDSTNWTNDIYSKVKGPEKRGRVCCLGKLPHQASSSQSSYANNRIQKLENLLGNLVAVLKVRFAEDPQINQVLEAIDQEVPTNGSTSKDHQTTNNLN	ATGGGAAATCGCAAAAAGTTGAATATCATTCAGAATGATGGTCAATCACAAGCAAAAGAGCAATCAATTGAAAGCTCTACTGAAGTGAACCAAAATAACAACTATATACTTGAAGAAAATGCACAATTTGAAGGAGAACAACACATACAAGAAGATAGTCATGTTCAGTCTCATACTTCTCTTGAAAGTGCAAGTGAAAGTTCAACTAAAGGTAAAAAGAAAACTAGAGGTTATACACATATGCTAGATGTGTGGGACTTGCTAGATGGAGAATTCATACTTGTTGAAGTAAATCATTGGGGCAATCCTATGCGTTGGGAAGGGAAAACTCTACTGAATGCAACTGGGAGCTTGAGTAAGTTTCGATTTGTTCCTGAATTAACTGAACAAATAAAGAAA…
Chr01	GmHk_01G000341.1	3853315	3853494	-	-	hypothetical protein							R	MSSPLFFPSLLDPRFHHPHRIFYLPPTAPKPSSSSASNITTTRRRRRRRRKRSKEKEKG	ATGTCCTCTCCTCTCTTCTTCCCCTCATTATTAGACCCTCGCTTTCATCATCCCCACCGCATCTTTTACCTCCCACCAACCGCACCAAAGCCATCATCCTCCTCTGCCTCTAACATCACCACCACAAGAAGAAGAAGAAGAAGAAGAAGAAAGAGAAGCAAGGAGAAAGAGAAGGGTTAG
Chr01	GmHk_01G000342.1	3871842	3873143	-	JGB_0	Protein JINGUBANG	GO:0005515	IPR015943;IPR017986;IPR019775;IPR036322	PF00400	cd00200		wD repeat domain	S	MGLLQRPLCCHTQQPQSHHHLHSESSTSSSLSSQPSLPSVPSLTPQKPHFLEEQPQTTHHRLITAVKGHTSPIFSLALHGKSLYSASSGGEIRACNRNPTSANDIITLKYISNVNTNTVVATSNAPIKSLIVSHDKLFTAHQDHKIRVWKTTTDQPGNNNNNNPNYYKCVATLPTLHDRISKLFSSKNYVEIRRHKKRTWVHHVDTVSALALSRDGSLLYSASWDRTFKIWRTSDFKCLESVKNAHEDAINSLVLSNNGFVYTGSADTRIKMWKKLEGEKKHSLIGTLEKHKSAVNALALNSDGSVLYSGACDRSILVWESDQNENNNTMVLVGALRGHTKAILCLVVVADLVCSGSADNSVRVWRRGAEKSYSCLAVFEGHRRPVKCLAMAVDSNSGG…	ATGGGACTTCTTCAACGTCCCTTGTGTTGCCACACACAACAACCACAATCCCATCATCACCTTCATTCCGAGTCATCAACTTCATCCTCCCTCTCTTCACAACCAAGCCTCCCTTCTGTCCCCTCCCTCACCCCACAAAAACCGCATTTCCTCGAAGAACAACCCCAAACCACCCACCACAGACTCATCACCGCCGTCAAGGGCCACACCTCACCAATCTTCTCCCTCGCCCTCCACGGCAAGTCCCTCTATAGCGCCTCCTCCGGCGGCGAAATAAGAGCATGCAATAGAAATCCCACATCGGCTAATGATATAATCACATTAAAATATATAAGTAATGTCAACACCAACACTGTTGTCGCGACCAGCAACGCGCCAATCAAGTCCCTCATCGTATCC…
Chr01	GmHk_01G000343.1	3877776	3878849	-	5MMP_0	Metalloendoproteinase 5-MMP	GO:0004222;GO:0006508;GO:0008237;GO:0008270;GO:0031012	IPR002477;IPR006026;IPR021190;IPR024079;IPR036365	PF00413;PF01471			matrix metallopeptidase	O	MMKSSSHLSAIFLLFFLLTALSPSDGVSFSSFLKQLKQKLEKSPTLKDFLKPTTIGDIYYTLNFTEIFSSEERSAPPVSLIKDYLSNYGYIESSGPLSNSMDQETIISAIKTYQQYFSLQPTGKLNNETLQQMSFLRCGVPDINIDYNFTDDNMSYPKAGHRWFPHTNLTYGFLPENQIPANMTKVFRDSFARWAQASGVLNLTETTYDNADIQVGFYNFTYLGIDIEVYGGSLIFLQPDSTKKGVILLDGTNKLWALPSENGRLSWEEGVLDLESAAMHEIGHLLGLDHSNKEDSVMYPCILPSHQRKVQLSKSDKTNVQHQFANVEDSAGHVGRLGVSLITTLSLGFAYLLLLLY	ATGATGAAATCTTCTTCACATCTTTCTGCAATATTCCTATTGTTCTTTCTCCTTACTGCCCTATCCCCTTCGGATGGAGTTTCATTCTCTTCATTCCTAAAGCAATTAAAACAGAAGCTGGAGAAGAGTCCCACCCTAAAAGATTTCCTGAAACCCACCACTATAGGGGATATTTATTATACGTTGAATTTCACAGAAATCTTCTCTTCCGAAGAGAGAAGCGCACCACCGGTGTCTCTCATCAAAGATTACTTATCAAACTACGGCTACATTGAATCCTCTGGGCCATTGAGCAATTCGATGGACCAAGAAACAATAATATCAGCCATTAAGACCTACCAGCAATATTTCAGTTTGCAACCCACCGGCAAACTAAACAACGAGACTCTTCAGCAAATG…
Chr01	GmHk_01G000344.1	3882815	3883168	+	-	hypothetical protein	GO:0008237	IPR024079;IPR036365	PF01471			matrix metallopeptidase	O	MKSYLSAFLLFLLLLKLVDKSISARVPPSSTKVIFKKIGENSLDNVKQKFSPQQPNSPPKQIEGLSFFKGYLSNFGYLQSSEPFNDYLDEETITAIKTYQQYFNPQPTVDINNETLH	ATGAAATCATACCTTTCTGCATTCCTATTATTCCTTCTCCTCCTTAAGCTTGTTGATAAATCCATCTCTGCACGTGTTCCTCCTTCTTCAACCAAAGTAATATTCAAGAAGATTGGTGAGAATTCATTGGACAATGTCAAACAAAAGTTCTCTCCCCAACAGCCAAACTCACCACCGAAGCAAATCGAAGGCCTATCTTTCTTCAAAGGGTACTTATCTAACTTCGGCTACCTCCAATCCTCCGAGCCATTCAACGATTATTTGGACGAGGAAACCATAACAGCTATTAAGACCTACCAGCAATATTTCAATCCTCAACCTACTGTTGACATAAACAACGAGACACTTCATTAA
Chr01	GmHk_01G000345.1	3887357	3888379	+	5MMP_1	Metalloendoproteinase 5-MMP	GO:0004222;GO:0006508;GO:0008237;GO:0008270;GO:0031012	IPR002477;IPR006026;IPR021190;IPR024079;IPR036365	PF00413;PF01471			matrix metallopeptidase	O	MKSYLSAFLLFLLLLKLVDKSISSRVPPSSTKVIFKKIGENSLDNAKQKFSPQQPNSPPKQIEGLSFLKDYLSNFGYLQSSEPFNDYLDEETITAIKTYQQYFNLQPTGNINNETLHQILLPRCAVPDMNFYYNFTDLKSWPKAGNQWFPMGKSLLTYGFQPMNEMTAEMKKVFTDAFTRWVRATAGVLKLTETTYDNADIKVGFYRFDGRFKNLLFGGSVIRYQPDSNVTTGEIRLDLTDLWALPREEDMLSQDGVLDLESAAMHQIGHLLGLDHSNKEDSVMYPYMLPSQKRKVELSVSDKDNILQQYANGNSGHGGRWGVLLFTILSLGFAFFVLGY	ATGAAATCATACCTTTCTGCATTCCTATTATTCCTTCTCCTCCTTAAGCTTGTTGATAAATCCATCTCTTCACGTGTCCCTCCTTCTTCAACCAAAGTAATATTCAAGAAGATTGGTGAGAATTCATTGGACAATGCCAAACAAAAGTTCTCTCCCCAACAGCCAAACTCACCACCGAAGCAAATCGAAGGCCTATCTTTCTTGAAAGACTACTTATCTAACTTCGGCTACCTTCAATCCTCCGAGCCATTCAACGATTATTTGGACGAGGAAACCATAACAGCTATTAAGACCTACCAGCAATATTTCAATCTTCAACCTACTGGTAACATAAACAACGAGACACTTCATCAAATCTTACTACCACGATGTGCTGTTCCCGACATGAATTTCTACTAC…
Chr01	GmHk_01G000346.1	3900935	3903078	-	3MMP	Metalloendoproteinase 3-MMP	GO:0004222;GO:0006508;GO:0008237;GO:0008270;GO:0031012	IPR002477;IPR006026;IPR021190;IPR024079;IPR033739;IPR036365	PF00413;PF01471	cd04278		matrix metallopeptidase	O	MSTSHQQRYLLFAFTTLIVFFSFNTTPVSARLFPNVSSIPRWNTSHAPPDSAWNAYRNFTGCRPGKTYNGLSNLKNYFHYFGYISDVSSKSSNFSDDFDDALEAAVRAYQKNFNLNITGELDDPTMNQIVKPRCGVADIINGTTTMNSGKTNTTDSPTFHTVAHYSFFDGQPRWPVGTQELTYAFDPDNALDDVIKTVFGNAFSRWSEVTTISFRETASYVAADIRIGFYGGDHGDGEPFDGVLGTLAHAFSPTNGMFHLDSAEDWVASGDVTKASLSNAVDLESVAVHEIGHLLGLGHSSVEDAIMYPTITARTRKVELNEDDIQGIQVLYGSNPNFTGTPATSSRESDTSDGGVRHVGATCAHIRVYNIRSMYCCRLVSSWSSFKLSYD	ATGAGCACTTCTCATCAACAACGTTATCTCCTCTTCGCTTTCACTACGTTAATAGTTTTCTTCAGCTTCAACACTACACCAGTTTCGGCTCGTTTGTTCCCCAACGTTTCCTCCATCCCAAGGTGGAACACATCCCACGCGCCACCTGATAGCGCGTGGAACGCGTATCGCAATTTCACTGGGTGCCGCCCGGGAAAAACATATAACGGTCTTTCGAATCTGAAAAACTACTTTCATTATTTTGGCTACATCTCCGACGTGTCCTCGAAGTCGTCGAATTTTAGCGACGATTTCGATGATGCGTTGGAGGCAGCCGTTAGAGCCTACCAGAAGAACTTCAACCTCAACATCACAGGGGAGCTCGACGACCCCACGATGAACCAAATCGTCAAGCCACGC…
Chr01	GmHk_01G000347.1	3912505	3912792	+	MEP1_0	Metalloendoproteinase 1	GO:0008237	IPR024079;IPR036365	PF01471			matrix metallopeptidase	O	MDNIEQKFPLQLHSNASLRQIKGLSLIKDYFSNYGYINNESSAPFNDSLDQQTISAIKTYHQYFNLQITGNLNNETIQQLSLLRCSVPDINFTII	ATGGACAACATTGAACAAAAGTTTCCCCTACAATTACATTCAAACGCATCACTAAGGCAAATCAAAGGCTTATCTCTCATCAAAGACTACTTCTCCAATTACGGCTACATTAACAATGAATCCTCTGCACCATTCAACGATTCTCTTGACCAACAAACAATATCAGCCATCAAGACCTACCATCAATATTTCAATCTTCAAATTACTGGTAACCTTAACAACGAAACTATTCAGCAACTCTCGCTGCTACGATGCAGCGTCCCCGACATTAATTTTACTATTATTTAA
Chr01	GmHk_01G000348.1	3913620	3917737	-	-	hypothetical protein						NA	S	MARSSLHALSTILFLLRLLLSPSTHALKLPFRVNDVLPVLPHGISWPLLNNLHSAVDLLPSFVGAVTPDNGSLQWKGACFYDNQASLEFTAPGGAVLHLKTEAAHSWTCMDLYVFATPYRITWDYYFSAREHTLQFDSWEEPAELEYVKLHGVSVFLMPSGMLGTLLSLVDVLPLFSNTAWGQNANLDFLKKHMGATFEKRNQPWRATIDPADVHSGDFLAVSKIRGRWGGFETLEKWVTGAFAGHTAVCLKDEIGNLWVGESGHENEKGEEIIVVIPWHEWWTLALKDNSNPQIALLPLHPELRARFNSTAAWEYARSMSGKPYGYHNMIFSWIDTVADNYPPPLDAHLVISVMSMWTRMQPAYAANMWNEALNKRLGTEDLDLHDILIETEKRGIAF…	ATGGCTCGCTCTTCTCTCCACGCGCTCTCCACCATTCTCTTCCTACTACGCTTGTTGTTATCTCCTTCCACACACGCCCTTAAACTCCCCTTCCGAGTCAACGATGTTCTCCCCGTTCTCCCCCACGGAATCTCCTGGCCCCTCCTCAACAACCTCCACAGCGCCGTCGACTTGCTCCCTTCCTTCGTCGGCGCCGTCACGCCCGACAACGGTTCCCTTCAGTGGAAGGGCGCCTGCTTTTACGATAATCAAGCCTCCCTCGAGTTCACCGCCCCCGGCGGCGCCGTGCTCCATCTCAAGACAGAAGCTGCACACAGTTGGACCTGCATGGATCTGTATGTTTTTGCAACACCTTATAGGATTACATGGGACTACTATTTCTCTGCGCGAGAACATACT…
Chr01	GmHk_01G000348.2	3913620	3917737	-	-	hypothetical protein						NA	S	MARSSLHALSTILFLLRLLLSPSTHALKLPFRVNDVLPVLPHGISWPLLNNLHSAVDLLPSFVGAVTPDNGSLQWKGACFYDNQASLEFTAPGGAVLHLKTEAAHSWTCMDLYVFATPYRITWDYYFSAREHTLQFDSWEEPAELEYVKLHGVSVFLMPSGMLGTLLSLVDVLPLFSNTAWGQNANLDFLKKHMGATFEKRNQPWRATIDPADVHSGDFLAVSKIRGRWGGFETLEKWVTGAFAGHTAVCLKDEIGNLWVGESGHENEKGEEIIVVIPWHEWWTLALKDNSNPQIALLPLHPELRARFNSTAAWEYARSMSGKPYGYHNMIFSWIDTVADNYPPPLDAHLVISVMSMWTRMQPAYAANMWNEALNKRLGTEDLDLHDILIETEKRGIAF…	ATGGCTCGCTCTTCTCTCCACGCGCTCTCCACCATTCTCTTCCTACTACGCTTGTTGTTATCTCCTTCCACACACGCCCTTAAACTCCCCTTCCGAGTCAACGATGTTCTCCCCGTTCTCCCCCACGGAATCTCCTGGCCCCTCCTCAACAACCTCCACAGCGCCGTCGACTTGCTCCCTTCCTTCGTCGGCGCCGTCACGCCCGACAACGGTTCCCTTCAGTGGAAGGGCGCCTGCTTTTACGATAATCAAGCCTCCCTCGAGTTCACCGCCCCCGGCGGCGCCGTGCTCCATCTCAAGACAGAAGCTGCACACAGTTGGACCTGCATGGATCTGTATGTTTTTGCAACACCTTATAGGATTACATGGGACTACTATTTCTCTGCGCGAGAACATACT…
Chr01	GmHk_01G000349.1	3925487	3929381	-	Zmynd15_1	Zinc finger MYND domain-containing protein 15		IPR002893	PF01753			zinc finger MYND domain-containing protein 15-like	S	MECAAKGSGGRCGGSGSGGATRLCARCEAVAYCSLSHQIAHWSRHKHECDRLQQQLKSVEVLNNFPFTFSRESTFQVCVKQETRCSFFSKRGLHQVGMWMHECHCGASSTSFDCLGLNNGWDLPSSLCPCCEPSSPVSEQLHCWRDYYKWRCIPLDSPVALLLQWPLTIYHAARLVGITALNPEISDKLYIHYLGPEKELLQLAVFGELLALFPGVRIHIELVGPAIPPQRDGEMIHISKYPCCNEDECECKIGSKNTFLETQSGITSTLTLQLWQGFYHDRYRDIVKDSFPHLIIAPNGGIAAYSSWLPSIELIKKIDVPVVFTDYCEEACHLAANCIETVTGSPLKLPVQLNPFRQPMAVEDSVLLLPCYSNCYLFGM	ATGGAGTGCGCGGCGAAGGGGAGCGGAGGAAGGTGCGGCGGCAGCGGCAGCGGCGGTGCCACAAGACTCTGCGCTCGCTGCGAAGCCGTTGCATATTGCTCTCTCTCTCACCAGATTGCACACTGGAGTCGTCACAAACACGAGTGCGATAGGTTGCAACAGCAATTGAAGAGTGTCGAAGTCCTCAATAATTTTCCCTTCACTTTCTCTCGCGAATCCACGTTTCAGGTTTGTGTGAAGCAGGAAACTAGGTGTTCATTTTTTAGCAAGAGAGGCCTTCATCAAGTGGGAATGTGGATGCATGAATGCCATTGTGGAGCATCATCTACTTCATTTGATTGTTTAGGGTTAAACAATGGTTGGGATCTCCCAAGTAGTTTATGTCCCTGTTGTGAGCCT…
Chr01	GmHk_01G000349.2	3925487	3929381	-	Zmynd15_1	Zinc finger MYND domain-containing protein 15		IPR002893	PF01753			zinc finger MYND domain-containing protein 15-like	S	MECAAKGSGGRCGGSGSGGATRLCARCEAVAYCSLSHQIAHWSRHKHECDRLQQQLKSVEVLNNFPFTFSRESTFQVCVKQETRCSFFSKRGLHQVGMWMHECHCGASSTSFDCLGLNNGWDLPSSLCPCCGNFISQASSSTSNFYLLLPLTIYHAARLVGITALNPEISDKLYIHYLGPEKELLQLAVFGELLALFPGVRIHIELVGPAIPPQRDGEMIHISKYPCCNEDECECKIGSKNTFLETQSGITSTLTLQLWQGFYHDRYRDIVKDSFPHLIIAPNGGIAAYSSWLPSIELIKKIDVPVVFTDYCEEACHLAANCIETVTGSPLKLPVQLNPFRQPMAVEDSVLLLPCYSNCYLFGM	ATGGAGTGCGCGGCGAAGGGGAGCGGAGGAAGGTGCGGCGGCAGCGGCAGCGGCGGTGCCACAAGACTCTGCGCTCGCTGCGAAGCCGTTGCATATTGCTCTCTCTCTCACCAGATTGCACACTGGAGTCGTCACAAACACGAGTGCGATAGGTTGCAACAGCAATTGAAGAGTGTCGAAGTCCTCAATAATTTTCCCTTCACTTTCTCTCGCGAATCCACGTTTCAGGTTTGTGTGAAGCAGGAAACTAGGTGTTCATTTTTTAGCAAGAGAGGCCTTCATCAAGTGGGAATGTGGATGCATGAATGCCATTGTGGAGCATCATCTACTTCATTTGATTGTTTAGGGTTAAACAATGGTTGGGATCTCCCAAGTAGTTTATGTCCCTGTTGTGGTAAC…
Chr01	GmHk_01G000350.1	3940180	3941364	+	ARR3_0	Two-component response regulator ARR3	GO:0000160	IPR011006	PF00072	cd00156		response regulator	T	MDTDGVVSLNHVSPEDSHEVHVLAVDDSLVDRKVIERLLKISACKVTAVDSGIRALQFLGLDEQRRTSESDGFVPDLKVDLIITDYCMPEMTGYELLKKIKESTMFREIPVVIMSSENILPRIDRCLEEGAEDFIVKPVKLSDVKRLKGYLTPKEVIKVDRRSDGYVNGGCKGGDGGGGGGVEINNNKRKLEEQDTSDVSTSPPSTSTLSSSPSVSSPSPSSSPTSSPSVLASPIRRLKMTSTD	ATGGACACGGACGGTGTCGTTTCGCTCAACCATGTCTCGCCGGAGGATTCCCACGAGGTTCATGTCTTGGCCGTCGACGACAGCCTCGTTGATCGAAAGGTCATTGAGCGCTTGCTCAAAATCTCAGCTTGTAAAGTTACGGCTGTGGATAGTGGAATCAGAGCACTGCAATTTCTGGGGCTGGATGAGCAGAGAAGGACCTCTGAATCTGATGGTTTTGTCCCGGATTTGAAGGTGGATCTAATTATCACAGACTACTGCATGCCCGAAATGACCGGTTACGAGTTGCTCAAGAAAATCAAGGAATCGACCATGTTCAGAGAAATTCCAGTAGTGATCATGTCTTCCGAAAACATTTTGCCGCGCATAGACAGATGTTTGGAGGAAGGTGCAGAGGAT…
Chr01	GmHk_01G000351.1	3955805	3958327	+	FH8_0	Formin-like protein 8		IPR015425	PF02181			FH2	U	MSVNMMLLLVILFVLQSFLIPTCYCQTNTPQNIEIFYPIQTPKPPFPIQPPESQPKPQASPPSPGPVAASKTSSSSSKIGTAVAATAAGTLVVSGLIFCLVQRCFRARKRKEVTNNTASAVDRRVAPQVNVFERMEGNVKGLIVDEDGLDVVYWRKLEGKKLPDKDFQREVLDGTQDKIEDDHEENQRKRSESIQEIPLLRDRSSTSHMNIFLPEESYTIMRIPPPAPPPSVPSSIGGSSTQSPSPPFTPSSPKPLNTSFSSISNITSPALPITDINNQAPAPPPPPPIAGIKSSALPPPPPPIPVKKNSAAAPPPPPPIPNKKNSAAAPPPPPIPPRKSPAPPPPPPKASGLKSSSKPPPTPIERTPSTTTRQGNTSPEVKLKPLHWDKVTTNLDHSM…	ATGTCTGTGAACATGATGCTTCTTCTTGTGATCCTTTTTGTTTTACAAAGTTTTCTAATACCAACATGCTATTGCCAAACCAATACTCCTCAGAATATCGAAATATTTTATCCAATCCAAACTCCAAAACCACCCTTTCCAATCCAACCTCCTGAGTCACAACCAAAGCCACAAGCATCACCACCATCACCAGGACCAGTAGCTGCATCAAAAACCTCTTCATCAAGCAGTAAGATCGGAACAGCGGTGGCTGCAACTGCAGCAGGTACTCTAGTTGTTTCTGGTTTGATTTTCTGCTTGGTCCAAAGGTGCTTCAGAGCAAGGAAGAGAAAGGAGGTCACAAACAACACTGCTTCTGCCGTAGATAGGCGCGTTGCACCTCAGGTCAACGTGTTTGAG…
Chr01	GmHk_01G000352.1	3959435	3963603	-	WDL7_0	Protein WVD2-like 7						NA	S	MGEFLVDATVFEDKKMGEGAAASNPALQVSVSFGRFENDSLSWERWSSFSPNKYLEEVEKCATPGSVAQKKAYFEAHYKKVAARKAELLAQEKQREKDSFGSEEHSGIDLSGNTDAEHDISNNTQGSSEGVEHETSSAGEIHKTHVNESEEEFAVSRDYQSSSVQVENKELESRSHSSYQIDEPENVCKKQVESPNNNIEAEDVKEISHVVYKETGKASEGEVKDVKLNHPKESKVKSVSKGSNAARTKKKSMLPTSKASPISTPKSSKPASTTPTKTVTPASSTRKGSSPSLTRRQITSSGESRKFANKPLHMSLSLAPSNPDPAPQSTMRRSLIMENMGDKDIVKRAFKTFQNSFNQPKTSVEDKSLIKKQVPSRGTVSKVPTSTTLRKENGRPTKV…	ATGGGTGAATTTCTTGTGGATGCAACAGTGTTTGAAGATAAGAAGATGGGAGAGGGTGCTGCTGCTTCCAATCCTGCTTTGCAAGTGTCTGTTTCGTTTGGTAGATTTGAGAACGATTCCTTGTCTTGGGAGAGATGGTCCTCTTTCTCTCCAAACAAGTACTTGGAAGAGGTTGAGAAGTGTGCCACACCTGGATCAGTGGCCCAGAAGAAAGCCTACTTTGAAGCACATTACAAGAAGGTTGCCGCCCGGAAAGCCGAATTGCTGGCTCAGGAGAAGCAAAGGGAGAAAGATTCTTTCGGATCAGAAGAACATAGTGGAATAGATCTGAGTGGTAACACTGATGCAGAACATGATATATCCAACAACACTCAAGGTTCCAGTGAAGGGGTTGAGCAT…
Chr01	GmHk_01G000353.1	3965335	3965997	+	GLP7_0	Germin-like protein subfamily 1 member 1	GO:0030145;GO:0045735	IPR006045;IPR011051;IPR014710;IPR019780	PF00190			germin-like protein	S	MRTHFHSLPLIFLFTLSLLLGKTRPDPDPLQDYCVADSKSEFFINGVPCIDPDKVSSSHFVTSALSKTGNTSNQFGFSVTATTTANLPGLNTLGLVLVRVDIAGNGIVPPHSHPRASEVTTCLKGMLLVGFVDTSNRVFTQNLRPGESFVFPKGLVHFLFNSDSREPAIAISGLNSQNPGAQIASLATFASKPPIPDDILKKAFQISKGEVETIRRNLGG	ATGAGAACCCATTTTCACTCTCTCCCATTGATTTTTTTGTTCACCCTTTCCCTTCTATTGGGTAAAACCCGACCCGACCCTGATCCACTTCAAGATTATTGTGTAGCAGATAGCAAAAGTGAATTTTTCATTAATGGGGTGCCTTGCATTGACCCAGATAAAGTTTCCTCCTCCCATTTTGTCACATCTGCTTTATCAAAAACTGGCAACACTAGCAACCAATTTGGCTTCAGTGTCACAGCCACCACCACTGCTAATCTTCCTGGGCTTAACACCTTGGGCCTGGTACTGGTCCGGGTTGACATAGCGGGCAATGGGATCGTGCCACCTCACTCACATCCACGGGCCTCGGAAGTGACAACTTGCCTTAAGGGAATGCTTCTTGTGGGCTTTGTTGAC…
Chr01	GmHk_01G000354.1	3968537	3969673	-	GATL9_0	putative galacturonosyltransferase-like 9	GO:0016757	IPR029044	PF01501			galacturonosyltransferase-like 9-like	M	MLPLRLSAVVSSLILCFLFPPLLCLGIRSFPTTADDGAFFHYSEAPEYRNGAGCPVSSTRVSLPSCDPSLVHIAMTLDSGYLRGSIAAVNSVLRHSSCPENVFFHFIAAEFDPASPRVLTRLVGSIFPSLNFKVYIFREDTVINLISSSIRQALENPLNYARNYLGDMLDACVSRVIYLDSDVVVVDDVGKLWRAPITRERVIAAPEYCHANFTKYFTDEFWNDPLLSRVFSTRKPCYFNTGVMVMDLAKWREGNYRRKIENWMELQRKKRIYELGSLPPFLLVFGGNVEAIDHRWNQHGLGGDNLNGVCRSLHPGPVSLLHWSGKGKPWVRLDEKKPCPLDSLWEPYDLYKQVKDRVRDQNWGFSSSILVGYAHDLL	ATGCTTCCCCTCCGCCTAAGCGCCGTCGTTTCCTCACTCATTCTCTGCTTCCTCTTCCCGCCACTGCTCTGCCTCGGAATCCGCTCTTTTCCCACCACCGCAGACGACGGCGCGTTCTTCCACTATTCAGAAGCGCCGGAGTACCGAAACGGAGCGGGTTGCCCCGTTTCGTCAACCCGTGTTTCCCTCCCTTCATGCGACCCTTCTCTGGTCCACATCGCCATGACCCTCGACTCCGGCTACCTCCGCGGCTCCATCGCCGCCGTGAACTCCGTCCTCCGCCACTCCTCGTGCCCGGAAAACGTCTTCTTCCACTTCATCGCCGCCGAGTTCGACCCGGCTAGCCCGCGGGTCCTGACCCGACTCGTCGGCTCCATTTTCCCCTCTCTGAACTTCAAA…
Chr01	GmHk_01G000355.1	3980134	3985586	-	ODPA_0	Pyruvate dehydrogenase E1 component subunit alpha, mitochondrial	GO:0016624	IPR029061	PF00676	cd02000		Dehydrogenase	C	MLLSRISHRCIGSTLTKPFSAVISTSDTPLTIETSIHSTAHNCEPPSRAVATSSSELLTFFLDMALMRRMEIAADSLYKAKLIRGFCHLYDGQEAVAVGMEAAITKMDSIITAYRDHCTFLGRGGTLLEVFAELMGRRDGCSKGKGGSMHFYKKESGFYDGAANQGQLFEALSIAALWDLPAILVCENNHYGMGTAEWRAAKSPAYYKRGDYVPGLKRAVCSKEISKFSLLVMKRYKVIYMVTRRKPGLSLVDGMDVLAVKQACKFAKEHALKNGLLILEMDTYRYHGHSMSDHGSTYCTRDEISGVRQERDPIERVRKLLLSHDIAAKKELKDIEKEVRKEVDEAIAKAKENPMPDPSDLFTIVYIKGYGVETFGADRKEVRATLP	ATGCTTCTGTCACGCATATCCCACCGCTGCATCGGATCCACTCTCACAAAACCCTTCTCCGCCGTCATCTCCACCTCCGACACCCCCCTCACCATCGAGACCTCCATCCACTCCACCGCGCACAACTGCGAACCCCCCTCGCGCGCCGTGGCAACCTCCTCCTCGGAGCTCCTCACCTTCTTCCTCGATATGGCCCTGATGCGGCGCATGGAGATCGCCGCGGACTCCCTCTACAAGGCCAAGCTCATCCGCGGCTTCTGCCACCTCTACGACGGCCAGGAGGCTGTCGCCGTCGGCATGGAGGCCGCCATCACAAAAATGGACTCCATCATCACCGCTTACCGCGACCACTGCACCTTCCTCGGCCGCGGTGGCACGCTCCTCGAGGTCTTCGCCGAG…
Chr01	GmHk_01G000356.1	3987359	3994551	-	ISE2_0	DExH-box ATP-dependent RNA helicase DExH15 chloroplastic	GO:0003676;GO:0005524	IPR011545;IPR012961;IPR014001;IPR027417	PF00270;PF08148	cd00046;cd00079		helicase	L	MASNTELLLQRYPFSSSFRFLPLTTTTTLSFSLLRPRSLPFPLKFHASFSFKSPTSTLRAFSDAEEDEEDDEEDDEEEDQDHDQDNVSADEYDDVLGEASDDEADVFSPHDGFKWQRVDKLCNEVREFGADLIDVDELASVYDFRIDKFQRQAILAFLRGFSVVVSAPTSSGKTLIAEAAAVATVARGRRIFYTTPLKALSNQKFREFRETFGGSNVGLLTGDSAVNKDAQVLIMTTEILRNMLYQSVGNVSSGSGLVNVDVIVLDEVHYLSDISRGTVWEEIVIYCPKEVQLICLSATVANPDELAGWIGQIHGETELVTSSKRPVPLTWHFSLKNSLLPLLNEKGTHMNRKLSLNYLQLQAAVAKPYKDDWSRKRNPRKRGTLSGYDSDDNMFEQRS…	ATGGCCAGCAACACTGAACTCCTCCTCCAACGTTACCCTTTTTCTTCTTCTTTTAGATTTCTTCCCTTAACAACAACCACCACTCTCTCATTCTCTCTCCTTCGCCCTCGATCCCTTCCTTTTCCCCTCAAATTCCATGCCTCCTTCTCCTTCAAGTCCCCGACCTCAACCCTCCGCGCCTTCTCCGACGCCGAGGAGGACGAAGAAGACGATGAAGAAGATGATGAAGAAGAAGACCAAGACCATGACCAAGACAACGTTTCTGCCGACGAATACGACGACGTTTTGGGTGAGGCTTCCGACGACGAGGCCGACGTGTTCTCTCCGCACGATGGATTCAAGTGGCAGAGAGTCGACAAGCTATGCAACGAAGTCAGGGAGTTCGGCGCCGATCTCATC…
Chr01	GmHk_01G000357.1	3999684	4011113	-	SNL4_2	Paired amphipathic helix protein Sin3-like 4	GO:0006355	IPR013194;IPR031693;IPR036600	PF02671;PF08295;PF16879			Paired AMPhipathic helix protein	B	MKRSRDEVLTSCSQLKRPVLSSRGEASGQPQMMNGGAQKLTTNDALAYLKAVKDIFQDKRDKYDDFLEVMKDFKAQRIDTVGVIARVKELFKGHRDLILGFNTFLPKGYEITLPSEDDQPAPKKPVEFEEAINFVNKIKTRFQGDDHVYKSFLDILNMYRKEDKSITEVYQEVAAIFQDHPDLLDEFTHFLPDASAAASTHYASARNSMLRDRSSAMPTIRQLHVEKLLIKLTFYSSACQRERTIVSHGDHDPSVDRPDPDHDRGLLRIEKERRRVEKEKERREDRDKRERERDDRDYEHDGARDRERFSHKRNRKAEDSGAEPLLDADENFGVRPMSSTCDDKNSLKSMYSQEFAFCEKVKEKLRNPDDYQEFLKCLHIYSREIITRHELQSLVGDLL…	ATGAAGAGGTCCAGAGATGAAGTTCTCACGAGTTGTTCTCAATTGAAACGGCCTGTGTTGTCTTCACGAGGAGAAGCGTCTGGGCAACCGCAGATGATGAATGGAGGTGCTCAGAAACTGACAACTAATGATGCCCTTGCATATCTCAAGGCAGTGAAGGATATATTTCAAGATAAGAGGGACAAGTATGATGACTTTTTGGAGGTTATGAAAGATTTCAAGGCTCAAAGAATTGATACTGTGGGTGTCATTGCAAGAGTGAAGGAACTGTTTAAAGGCCACAGAGATCTTATATTGGGATTTAACACCTTCTTGCCTAAGGGTTACGAAATCACACTTCCATCAGAGGATGATCAACCTGCCCCAAAGAAACCCGTTGAATTTGAAGAGGCTATAAAT…
Chr01	GmHk_01G000357.2	3999684	4011113	-	SNL4_2	Paired amphipathic helix protein Sin3-like 4	GO:0006355	IPR013194;IPR031693;IPR036600	PF02671;PF08295;PF16879			Paired AMPhipathic helix protein	B	MKRSRDEVLTSCSQLKRPVLSSRGEASGQPQMMNGGAQKLTTNDALAYLKAVKDIFQDKRDKYDDFLEVMKDFKAQRIDTVGVIARVKELFKGHRDLILGFNTFLPKGYEITLPSEDDQPAPKKPVEFEEAINFVNKIKTRFQGDDHVYKSFLDILNMYRKEDKSITEVYQEVAAIFQDHPDLLDEFTHFLPDASAAASTHYASARNSMLRDRSSAMPTIRQLHVEKRERTIVSHGDHDPSVDRPDPDHDRGLLRIEKERRRVEKEKERREDRDKRERERDDRDYEHDGARDRERFSHKRNRKAEDSGAEPLLDADENFGVRPMSSTCDDKNSLKSMYSQEFAFCEKVKEKLRNPDDYQEFLKCLHIYSREIITRHELQSLVGDLLGKYPDLMEGFNEF…	ATGAAGAGGTCCAGAGATGAAGTTCTCACGAGTTGTTCTCAATTGAAACGGCCTGTGTTGTCTTCACGAGGAGAAGCGTCTGGGCAACCGCAGATGATGAATGGAGGTGCTCAGAAACTGACAACTAATGATGCCCTTGCATATCTCAAGGCAGTGAAGGATATATTTCAAGATAAGAGGGACAAGTATGATGACTTTTTGGAGGTTATGAAAGATTTCAAGGCTCAAAGAATTGATACTGTGGGTGTCATTGCAAGAGTGAAGGAACTGTTTAAAGGCCACAGAGATCTTATATTGGGATTTAACACCTTCTTGCCTAAGGGTTACGAAATCACACTTCCATCAGAGGATGATCAACCTGCCCCAAAGAAACCCGTTGAATTTGAAGAGGCTATAAAT…
Chr01	GmHk_01G000357.3	3999684	4011113	-	SNL4_2	Paired amphipathic helix protein Sin3-like 4	GO:0006355	IPR013194;IPR031693;IPR036600	PF02671;PF08295;PF16879			Paired AMPhipathic helix protein	B	MKRSRDEVLTSCSQLKRPVLSSRGEASGQPQMMNGGAQKLTTNDALAYLKAVKDIFQDKRDKYDDFLEVMKDFKAQRIDTVGVIARVKELFKGHRDLILGFNTFLPKGYEITLPSEDDQPAPKKPVEFEEAINFVNKIKTRFQGDDHVYKSFLDILNMYRKEDKSITEVYQEVAAIFQDHPDLLDEFTHFLPDASAAASTHYASARNSMLRDRSSAMPTIRQLHVEKRERTIVSHGDHDPSVDRPDPDHDRGLLRIEKERRRVEKEKERREDRDKRERERDDRDYEHDGARDRERFSHKRNRKAEDSGAEPLLDADENFGVRPMSSTCDDKNSLKSMYSQEFAFCEKVKEKLRNPDDYQEFLKCLHIYSREIITRHELQSLVGDLLGKYPDLMEGFNEF…	ATGAAGAGGTCCAGAGATGAAGTTCTCACGAGTTGTTCTCAATTGAAACGGCCTGTGTTGTCTTCACGAGGAGAAGCGTCTGGGCAACCGCAGATGATGAATGGAGGTGCTCAGAAACTGACAACTAATGATGCCCTTGCATATCTCAAGGCAGTGAAGGATATATTTCAAGATAAGAGGGACAAGTATGATGACTTTTTGGAGGTTATGAAAGATTTCAAGGCTCAAAGAATTGATACTGTGGGTGTCATTGCAAGAGTGAAGGAACTGTTTAAAGGCCACAGAGATCTTATATTGGGATTTAACACCTTCTTGCCTAAGGGTTACGAAATCACACTTCCATCAGAGGATGATCAACCTGCCCCAAAGAAACCCGTTGAATTTGAAGAGGCTATAAAT…
[truncated: 79,419 more rows]

## Sheet: Summary
Num Gene	60356
Num CDS	79870
Avg CDS (aa)	451.0
Avg mRNA (bp)	1721.0
Avg exons per gene	7.0
Num exon	538894
Avg exon (bp)	255.0
Num intron	459024
Avg intron (bp)	537.0
Num tRNA	1051
[truncated: 1 more rows]
